# Supplementary material for: Comprehensive Analysis and Identification of Prognostic Biomarkers and Therapeutic Targets Among FAM83 Family Members for Gastric Cancer
Source: Frontiers journal article supplement (doi:10.3389/fcell.2021.719613), 2021-11-19

FAM83C Expression Level (log2 TPM)

STAD

Purity

Rho = -0.032  
p = 5.35e-01

0.25

0.50

0.75

1.00

Purity

T cell CD4+\_TIMER

Rho = -0.055  
p = 2.88e-01

0.0

0.5

1.0

1.5

2.0

Infiltration Level

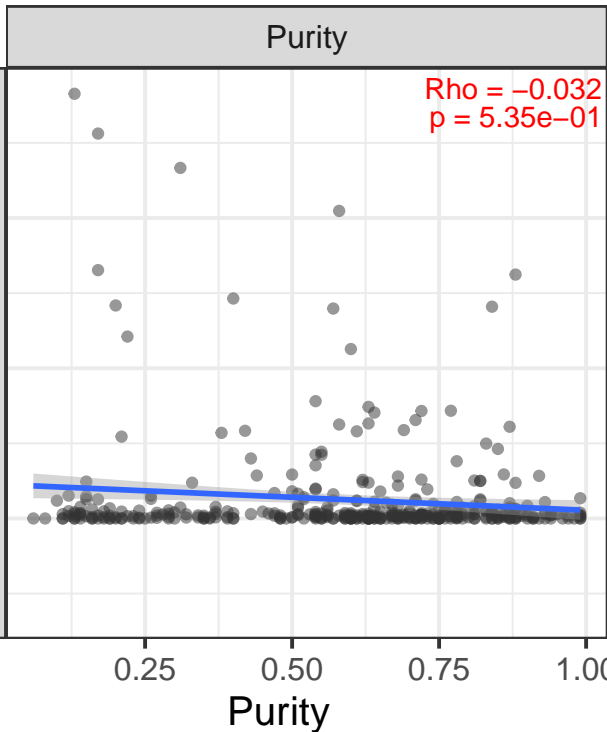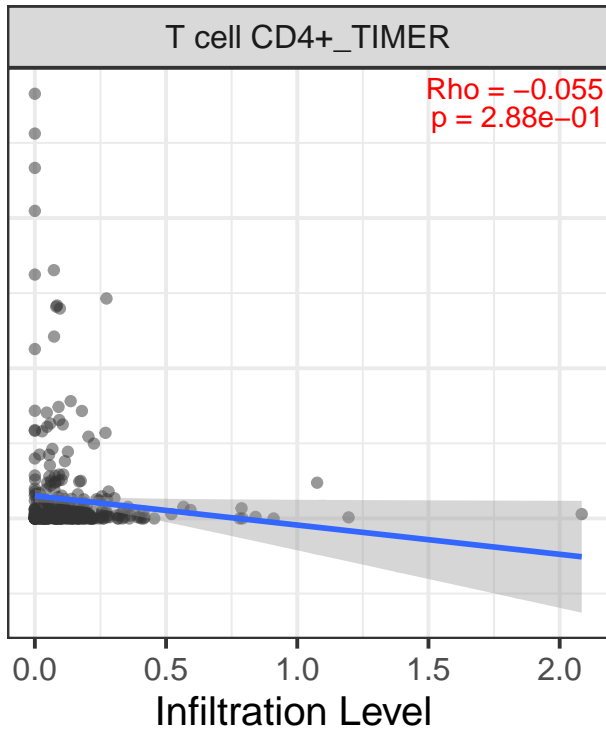

Supplement: Data_Sheet_12.ZIP [file Data_Sheet_12.ZIP]
