# Supplementary material for: Comprehensive Analysis and Identification of Prognostic Biomarkers and Therapeutic Targets Among FAM83 Family Members for Gastric Cancer
Source: Frontiers journal article supplement (doi:10.3389/fcell.2021.719613), 2021-11-19

FAM83H Expression Level (log2 TPM)

STAD

Purity

$\text{Rho} = 0.128$   
 $p = 1.24\text{e-}02$

0.25

0.50

0.75

1.00

Purity

T cell CD8+\_TIMER

$\text{Rho} = -0.141$   
 $p = 6.07\text{e-}03$

0.0

0.5

1.0

1.5

Infiltration Level

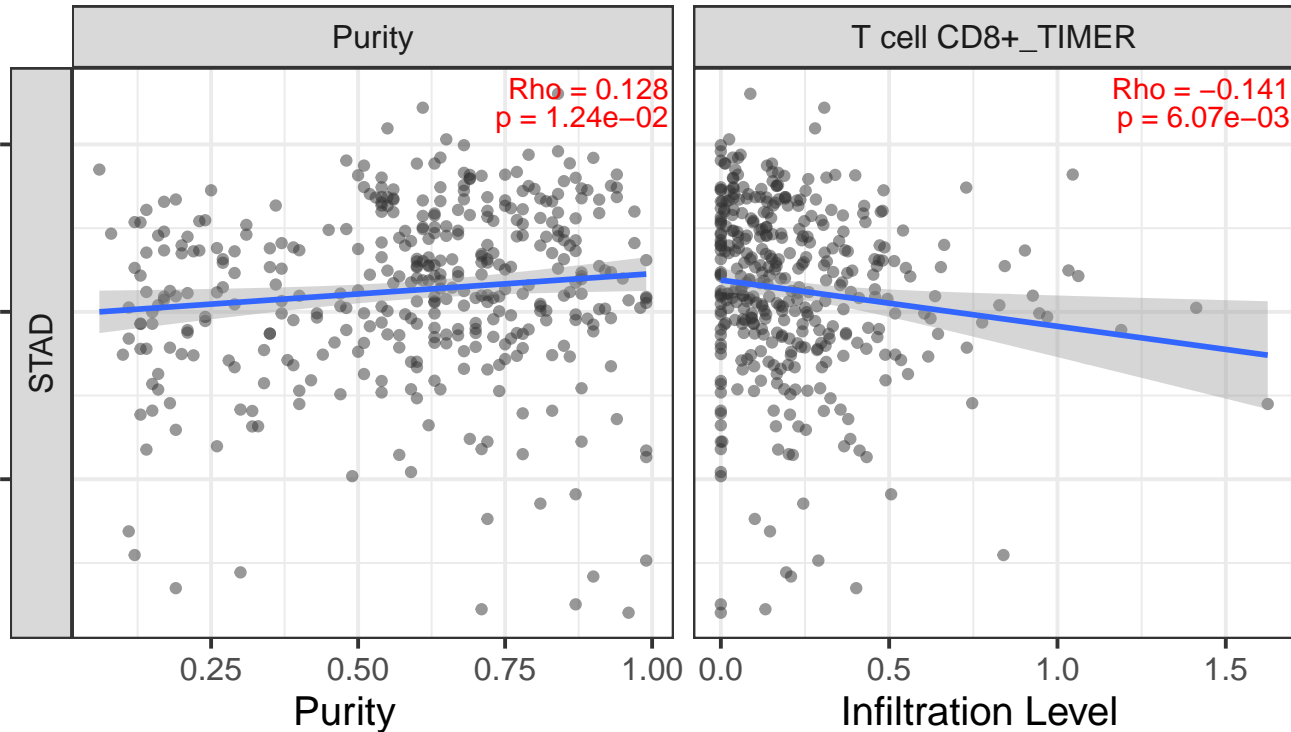

Supplement: Data_Sheet_12.ZIP [file Data_Sheet_12.ZIP]
