# Supplementary figures and images for: Comprehensive Analysis and Identification of Prognostic Biomarkers and Therapeutic Targets Among FAM83 Family Members for Gastric Cancer (part 2 of 2)
Source: Frontiers journal article supplement (doi:10.3389/fcell.2021.719613), 2021-11-19

# FAM83H (226129\_at)

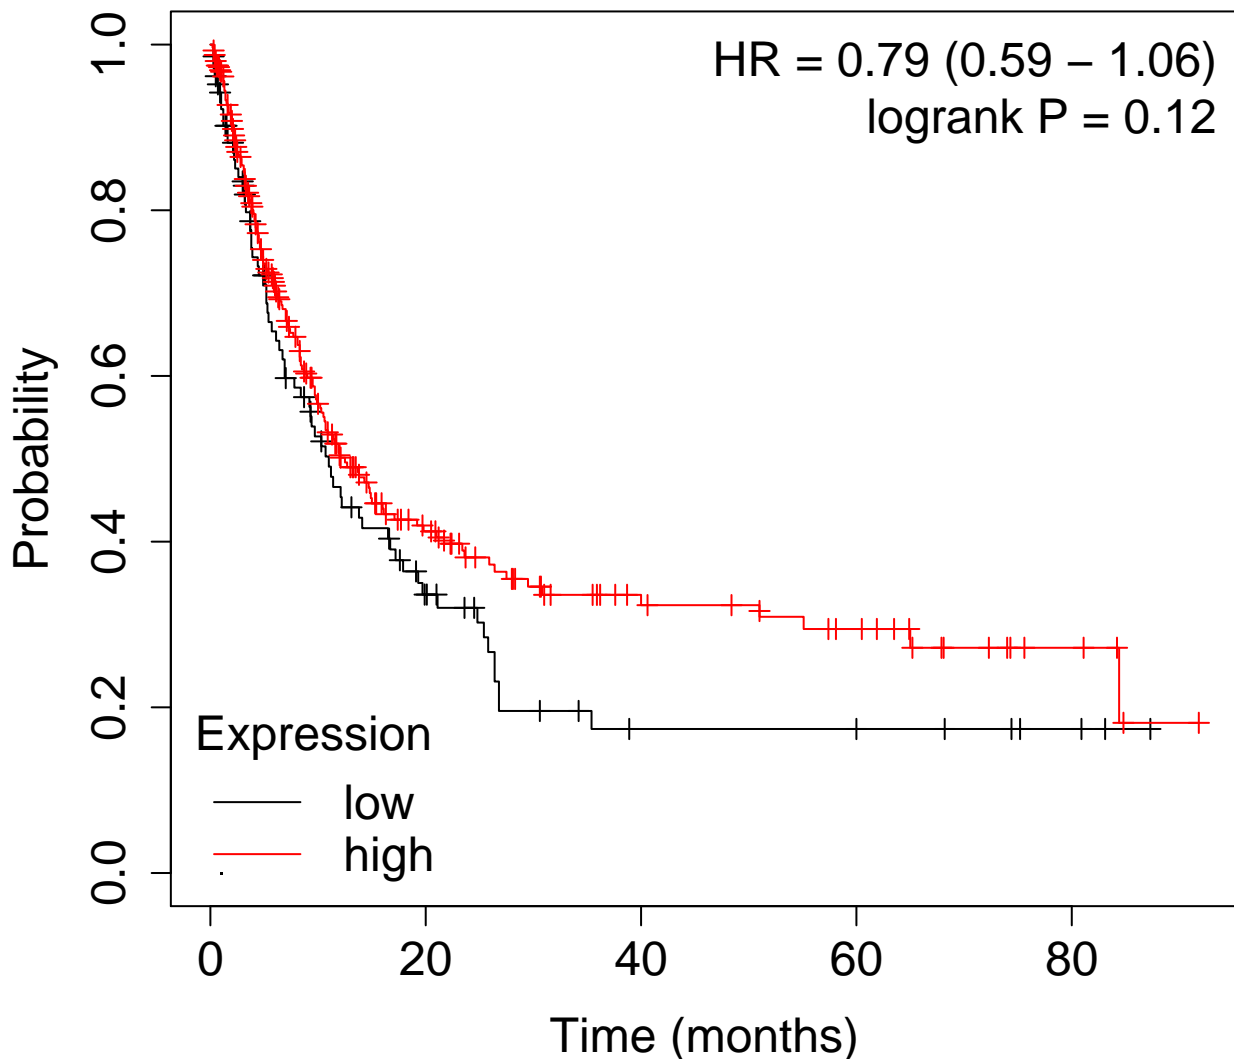

Number at risk

|      |     |    |    |    |   |
|------|-----|----|----|----|---|
| low  | 105 | 23 | 7  | 7  | 3 |
| high | 279 | 58 | 27 | 17 | 5 |

Supplement: Data_Sheet_8.ZIP [file Data_Sheet_8.ZIP]

# FAM83C (1556793\_a\_at)

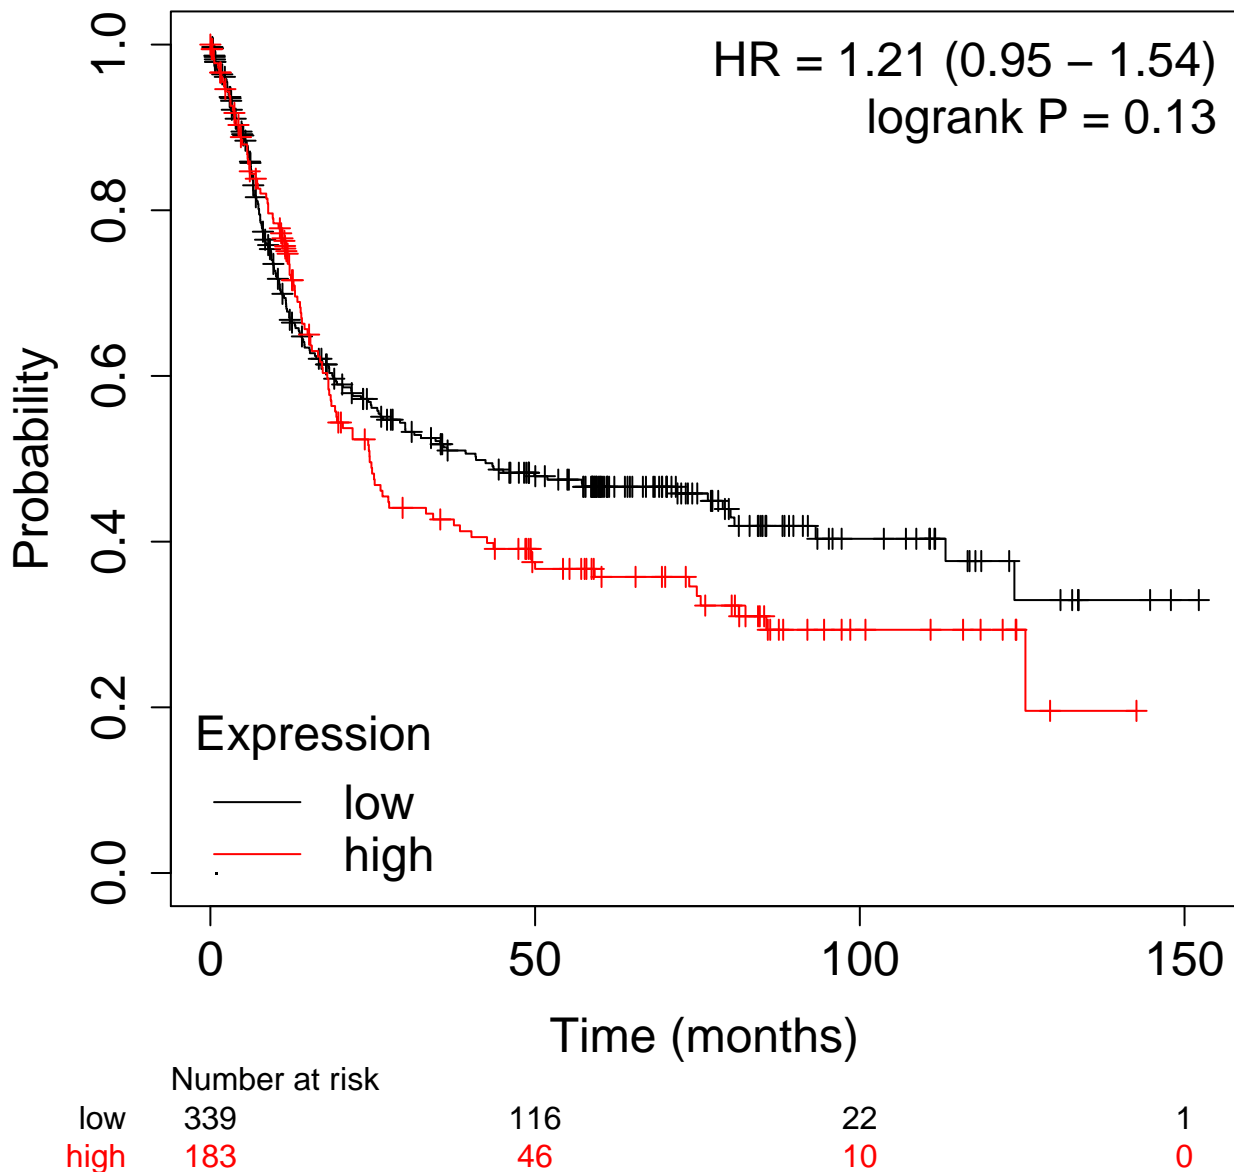

Supplement: Data_Sheet_8.ZIP [file Data_Sheet_8.ZIP]

# FAM83C (1556793\_a\_at)

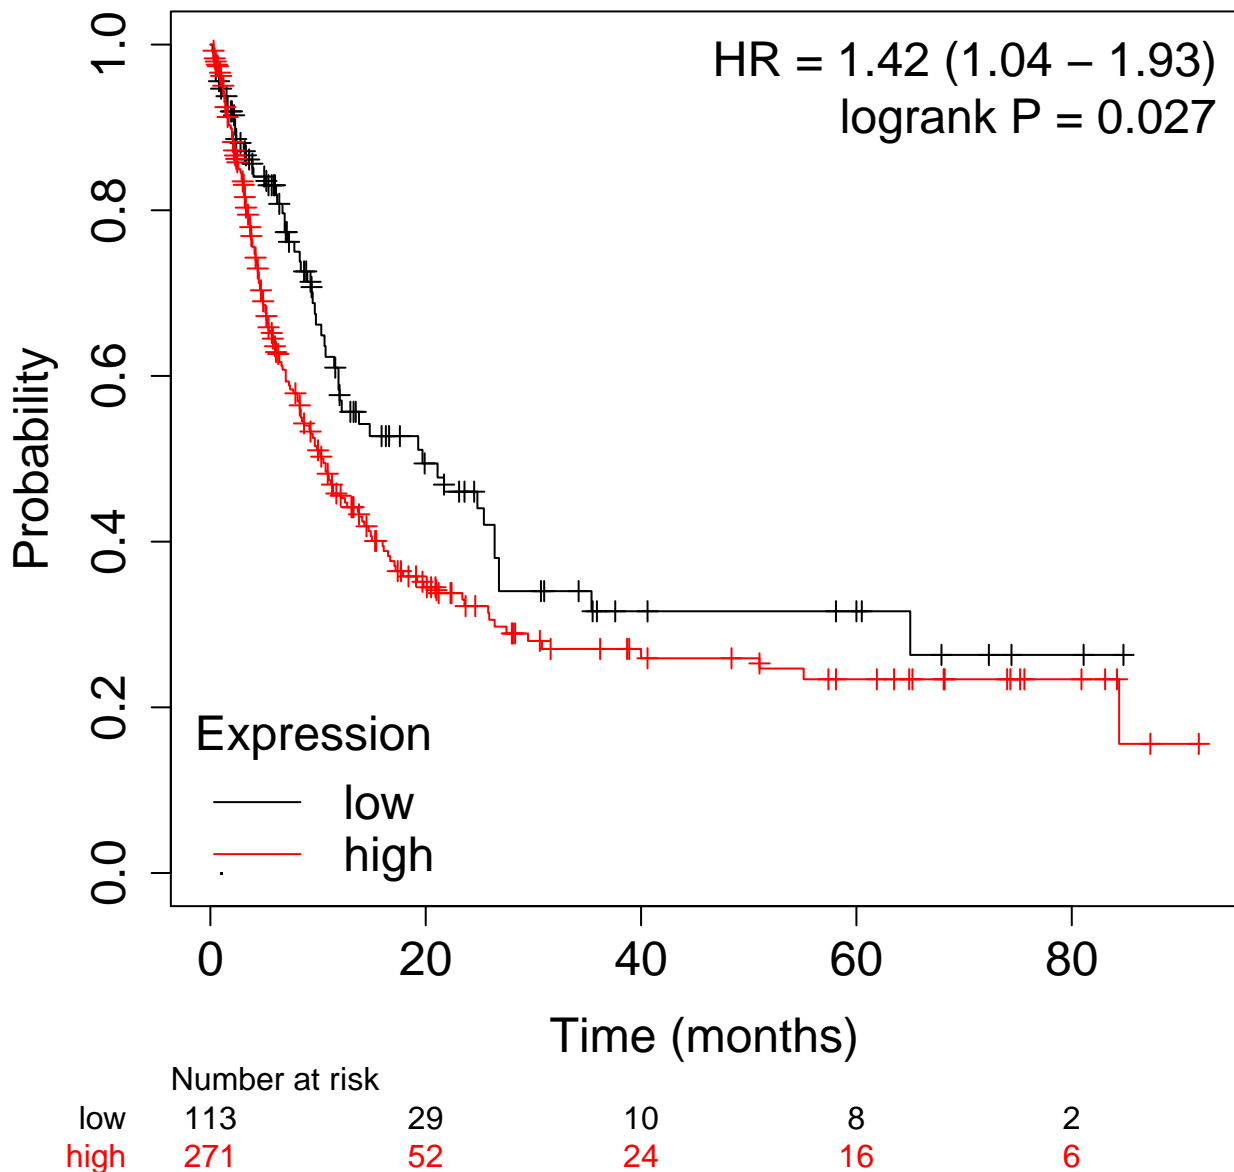

Supplement: Data_Sheet_8.ZIP [file Data_Sheet_8.ZIP]

# FAM83F (235269\_at)

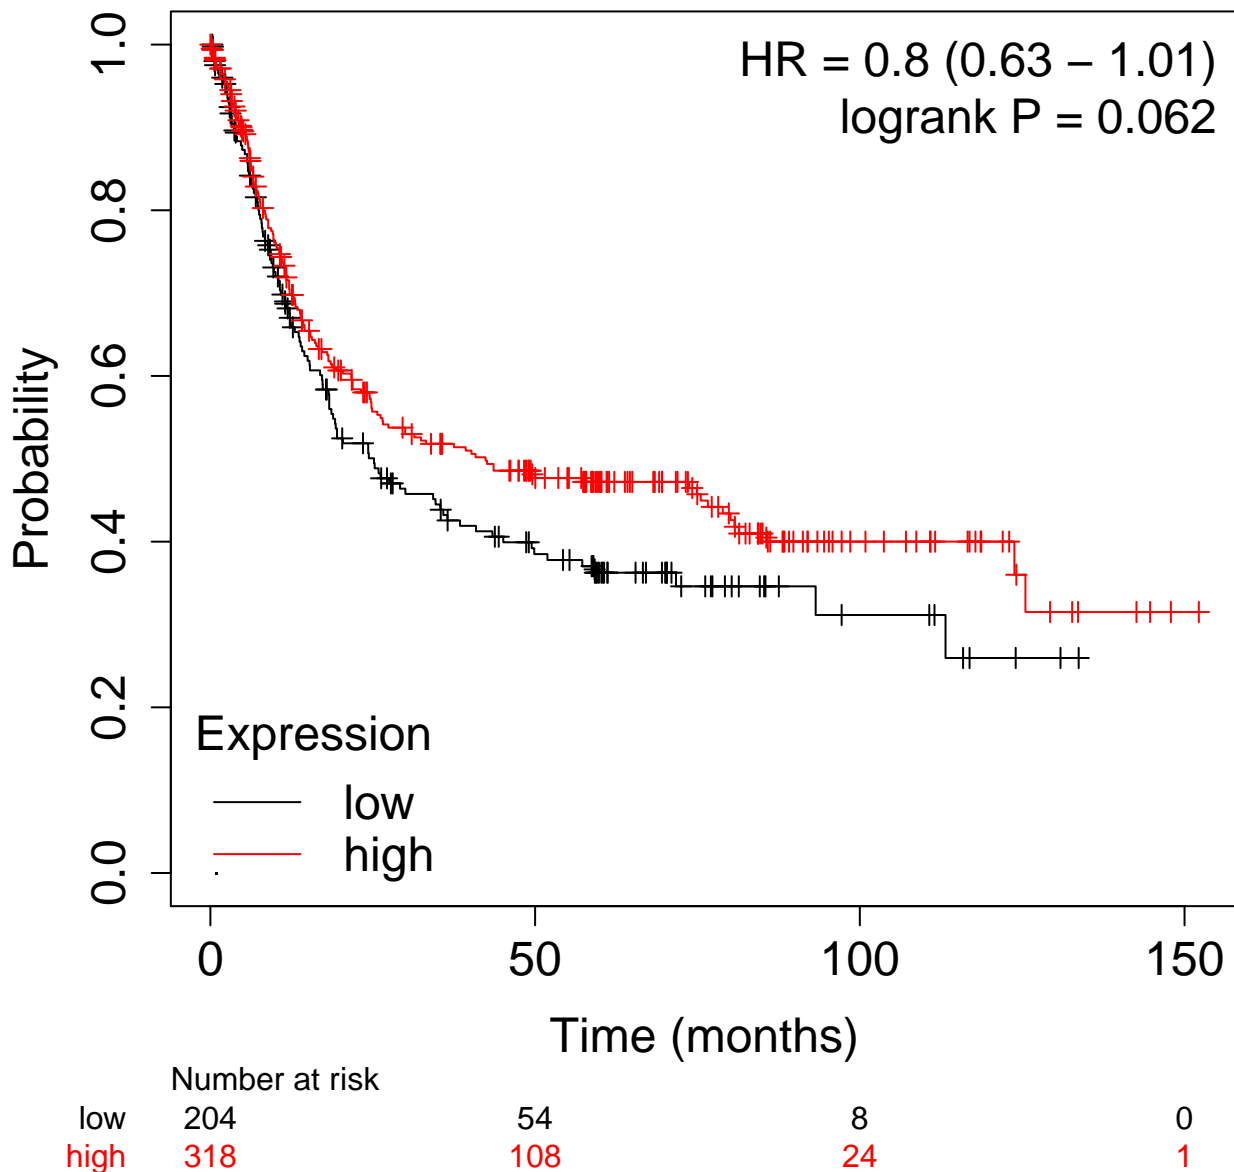

Supplement: Data_Sheet_8.ZIP [file Data_Sheet_8.ZIP]

# FAM83B (232202\_at)

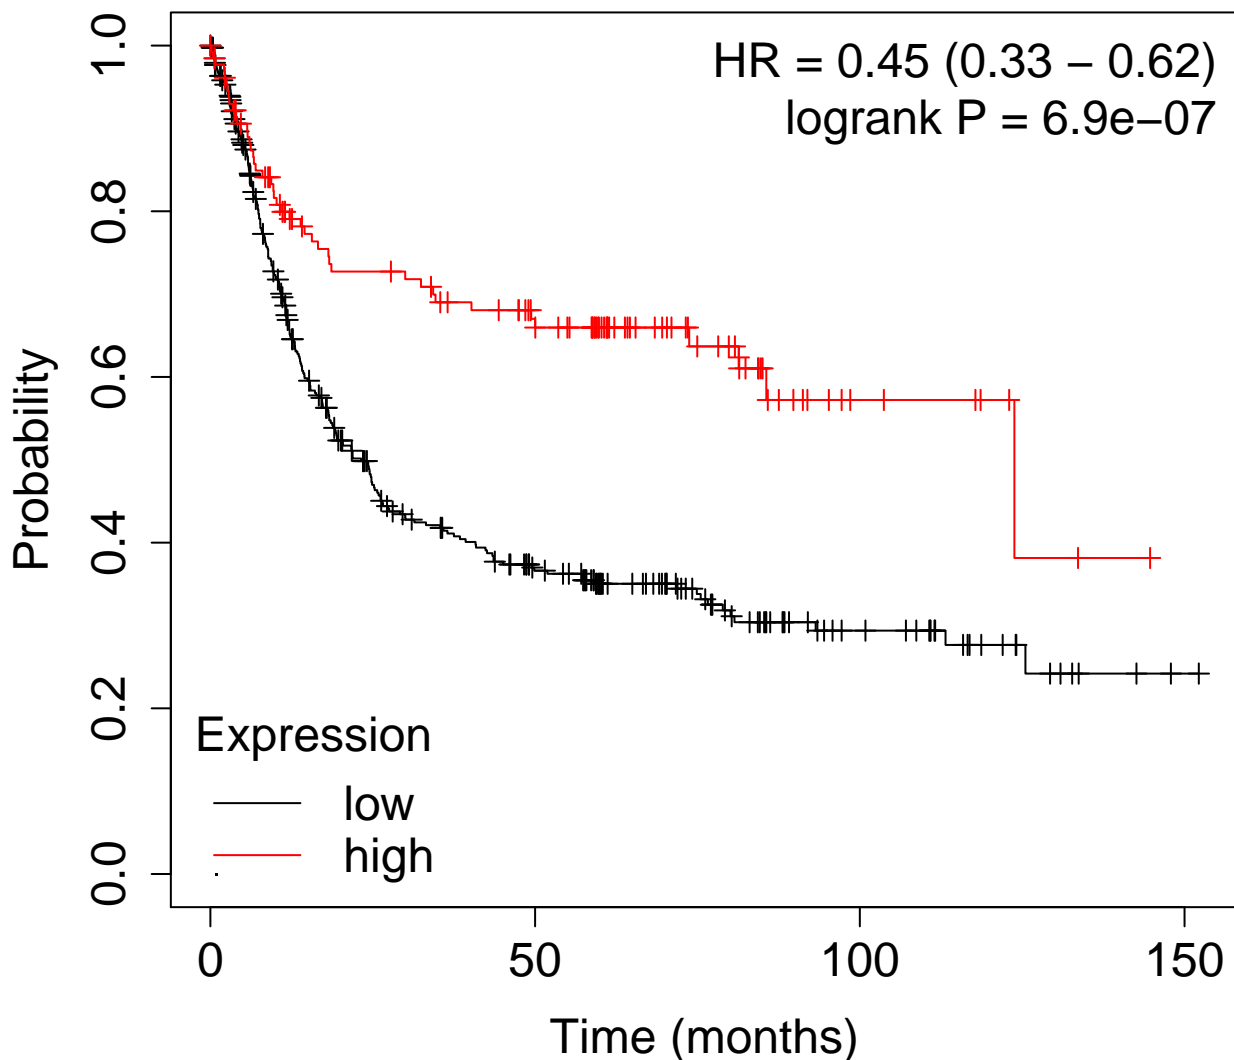

Number at risk

low  
high

391  
131

98  
64

25  
7

1  
0

Supplement: Data_Sheet_8.ZIP [file Data_Sheet_8.ZIP]

# FAM83F (235269\_at)

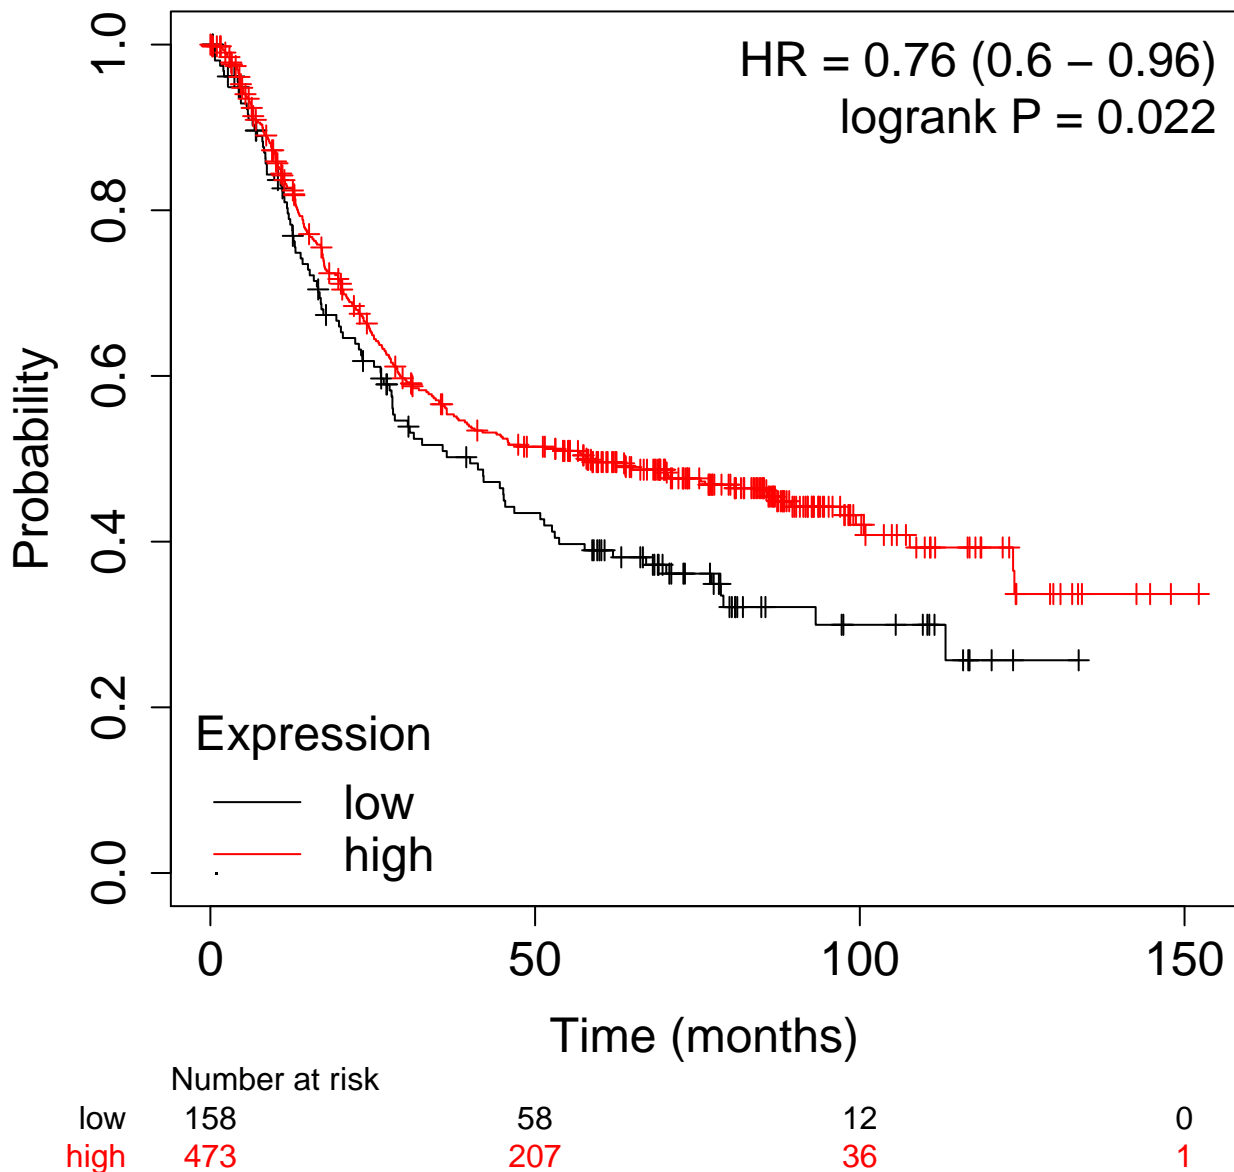

Supplement: Data_Sheet_8.ZIP [file Data_Sheet_8.ZIP]

# FAM83H (226129\_at)

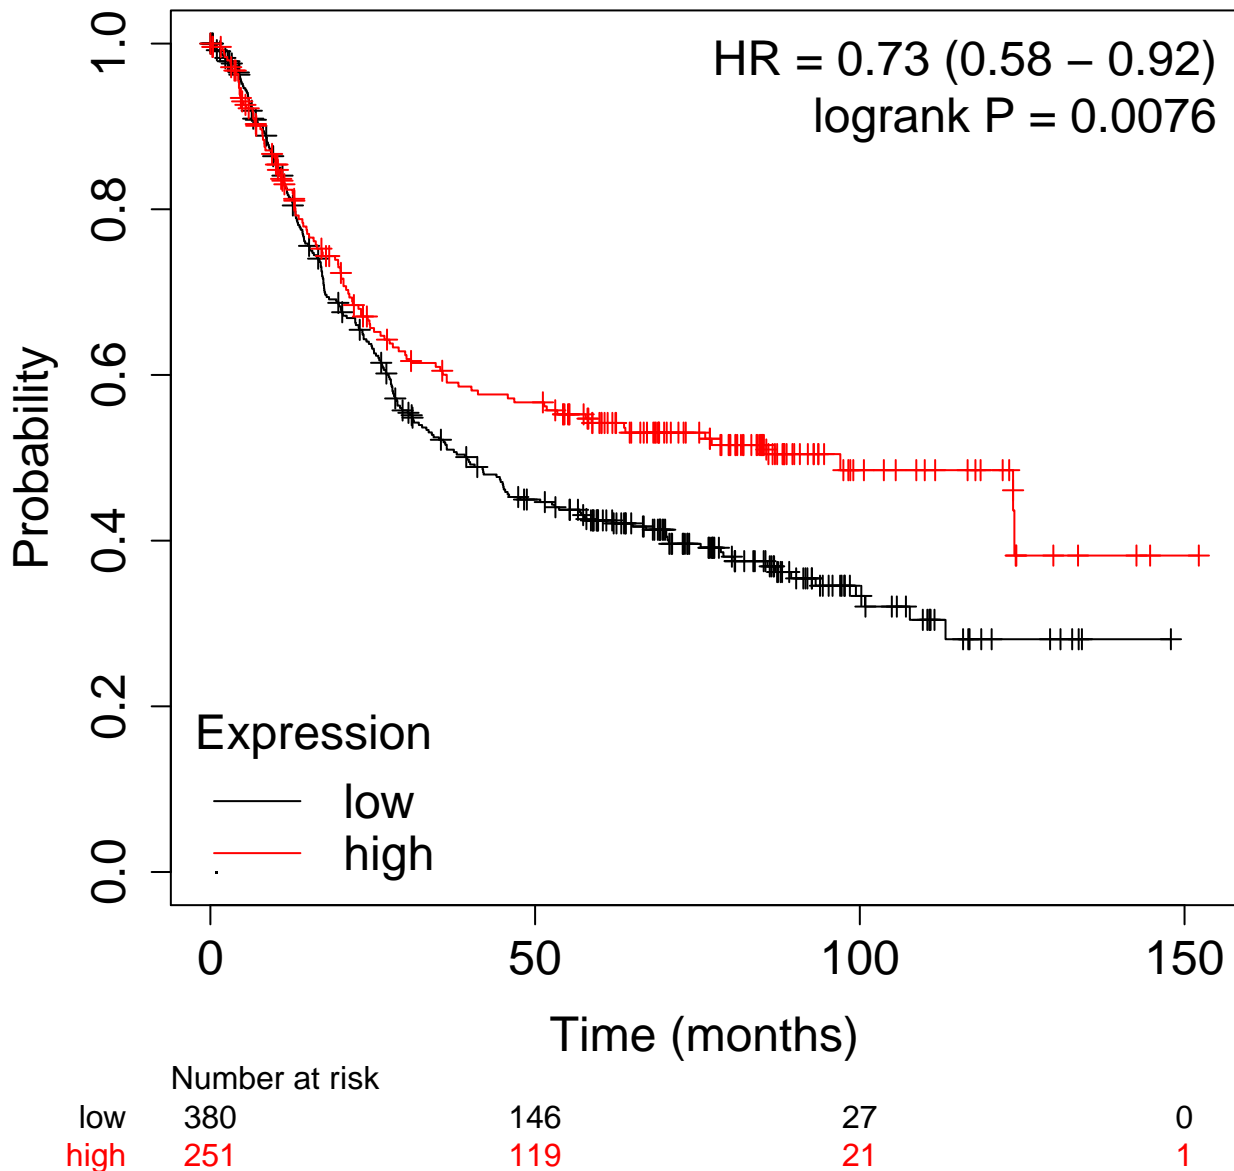

Supplement: Data_Sheet_8.ZIP [file Data_Sheet_8.ZIP]

# FAM83A (239586\_at)

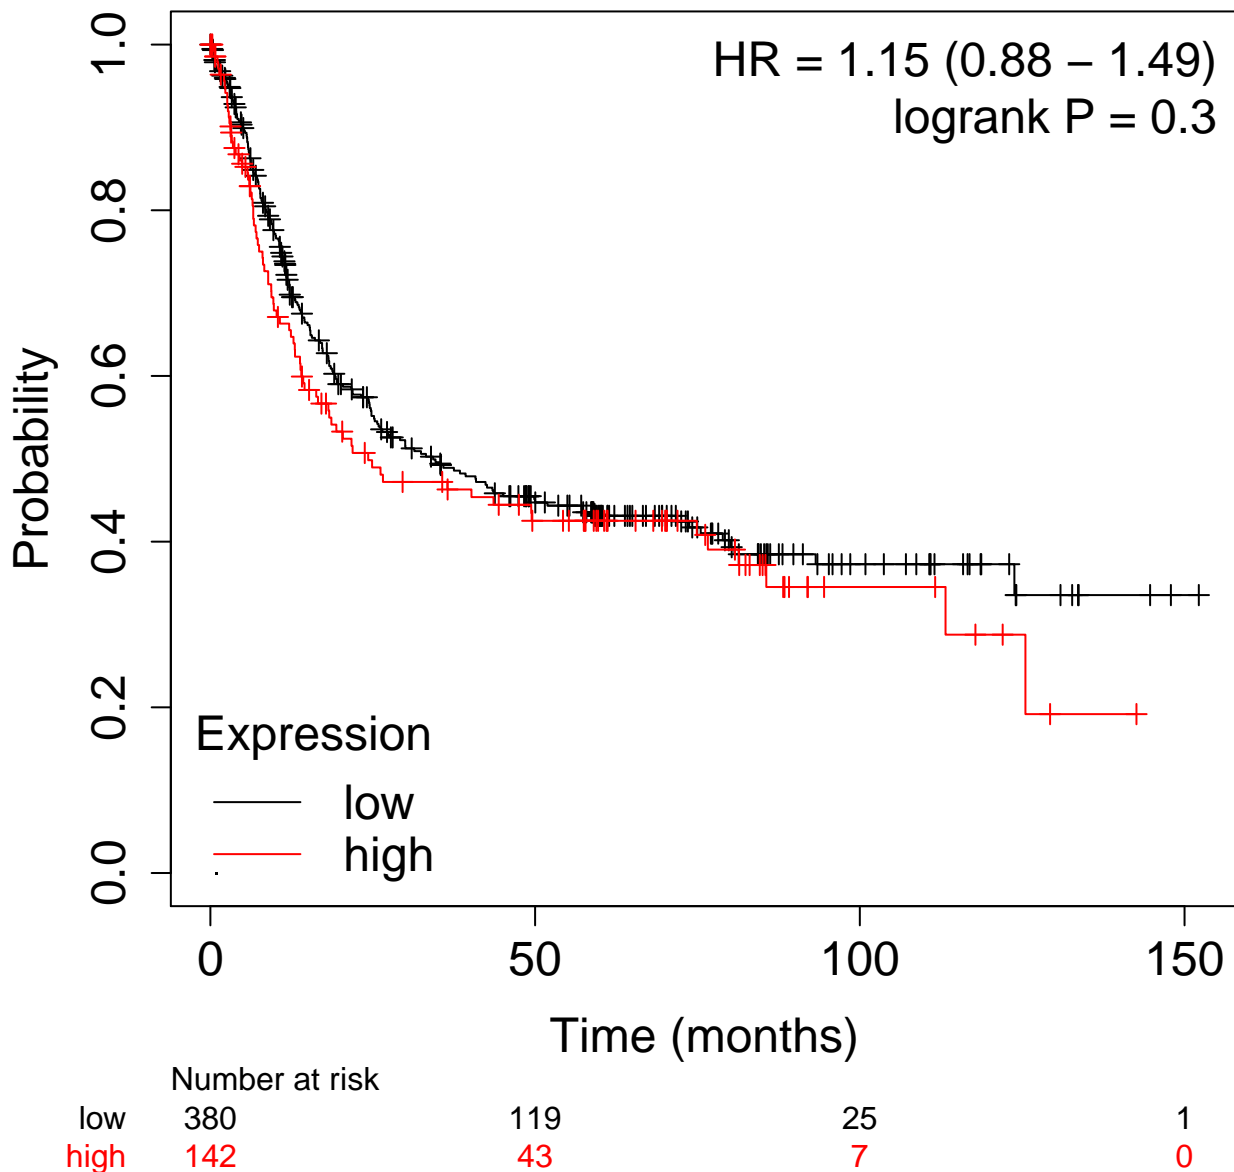

Supplement: Data_Sheet_8.ZIP [file Data_Sheet_8.ZIP]

# FAM83E (220312\_at)

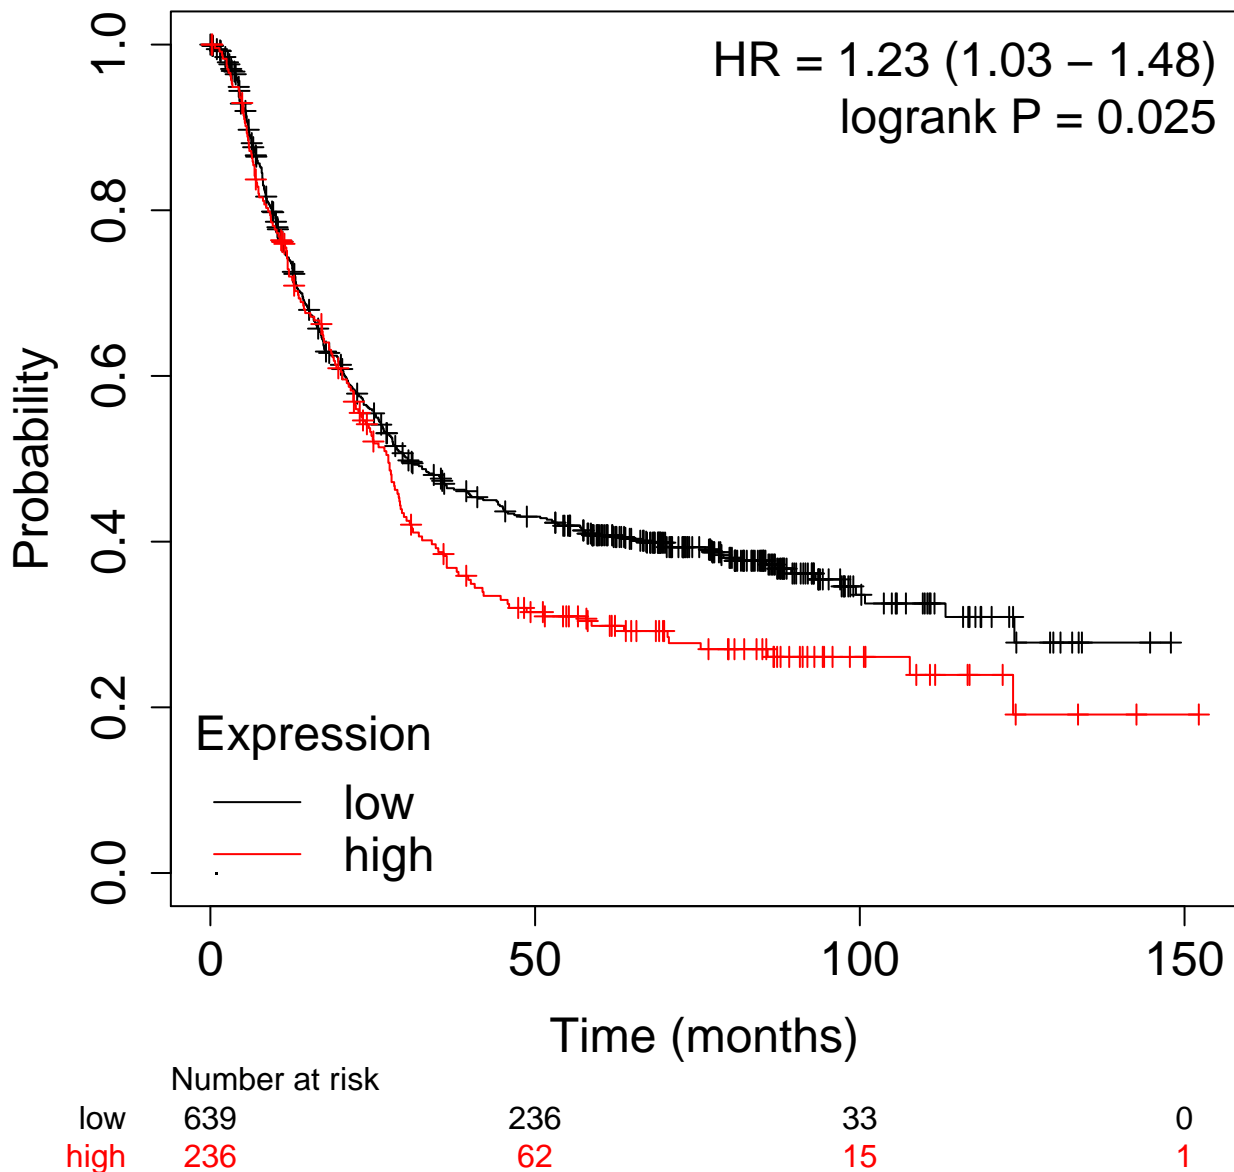

Supplement: Data_Sheet_8.ZIP [file Data_Sheet_8.ZIP]

# FAM83H (226129\_at)

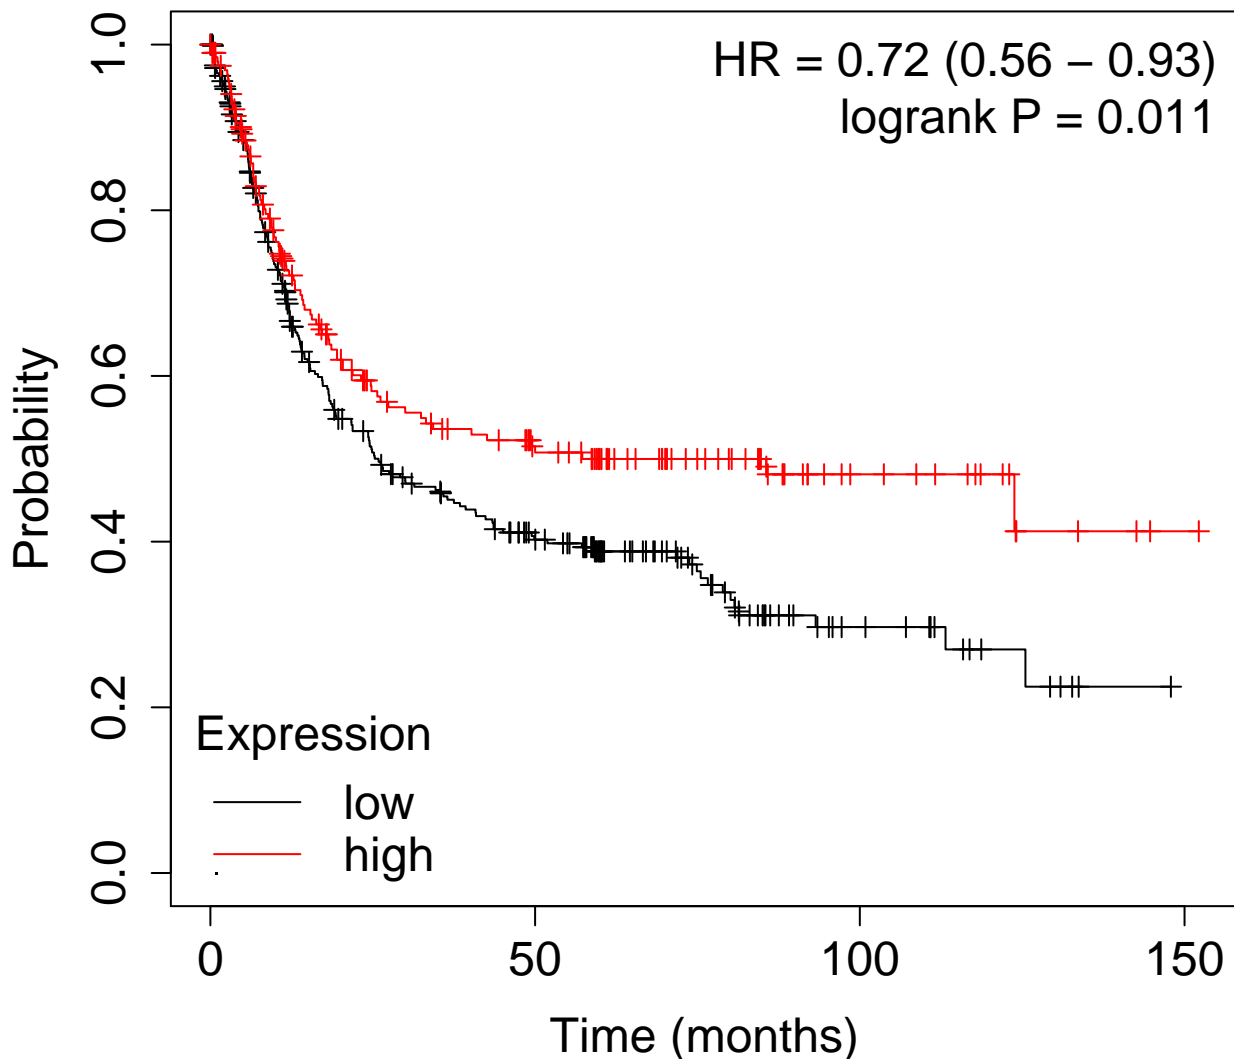

Number at risk

|      |     |    |    |   |
|------|-----|----|----|---|
| low  | 322 | 93 | 17 | 0 |
| high | 200 | 69 | 15 | 1 |

Supplement: Data_Sheet_8.ZIP [file Data_Sheet_8.ZIP]

# FAM83A (239586\_at)

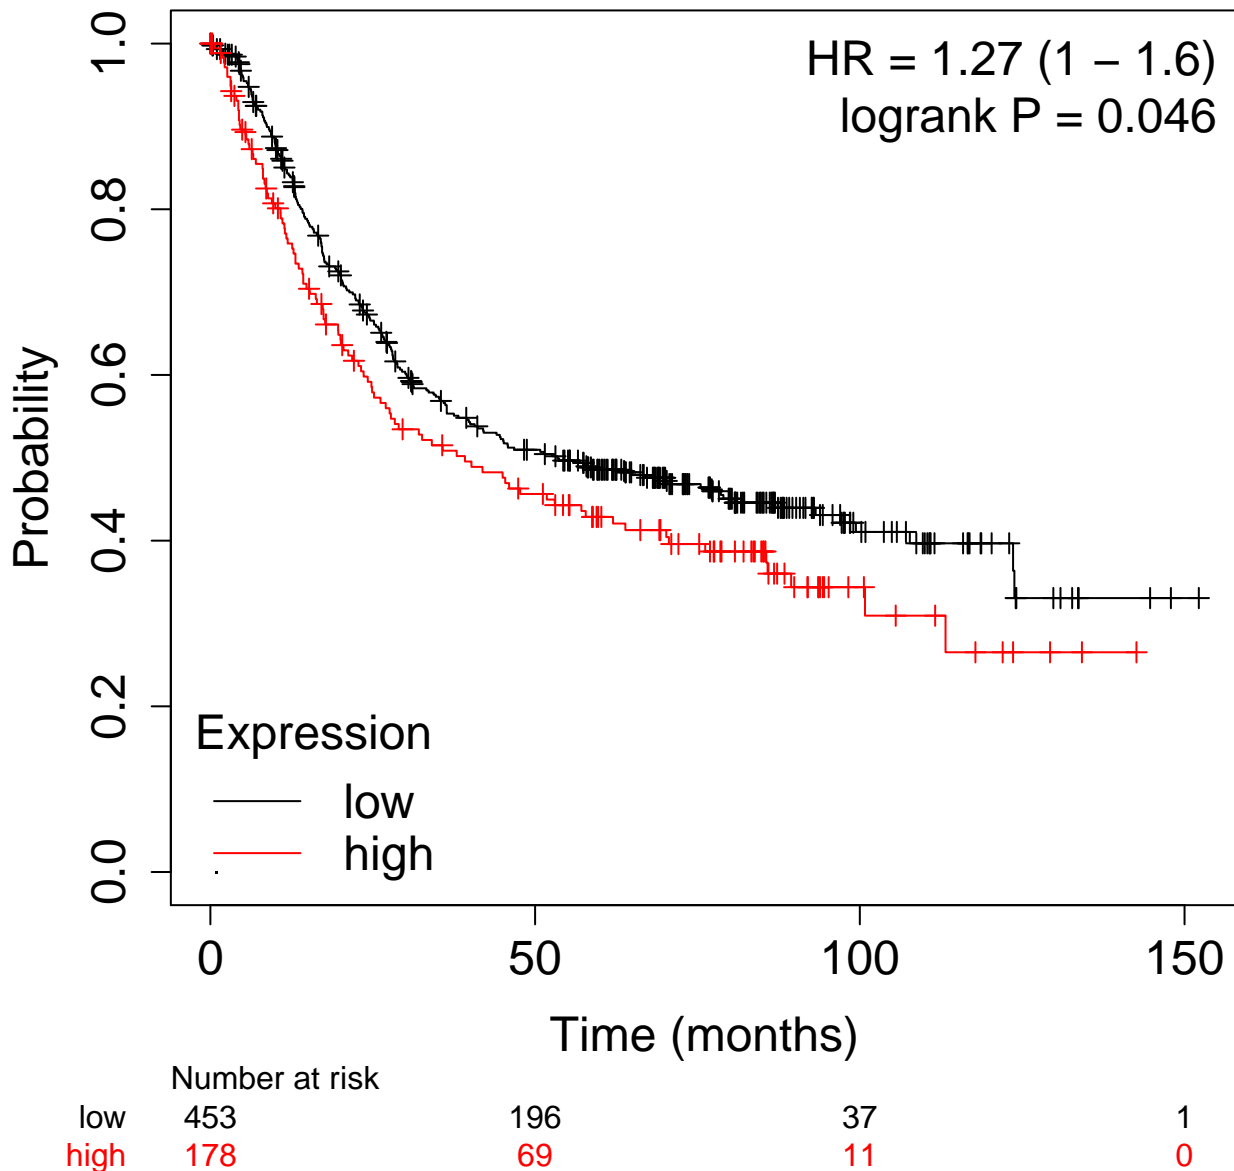

Supplement: Data_Sheet_8.ZIP [file Data_Sheet_8.ZIP]

# FAM83E (220312\_at)

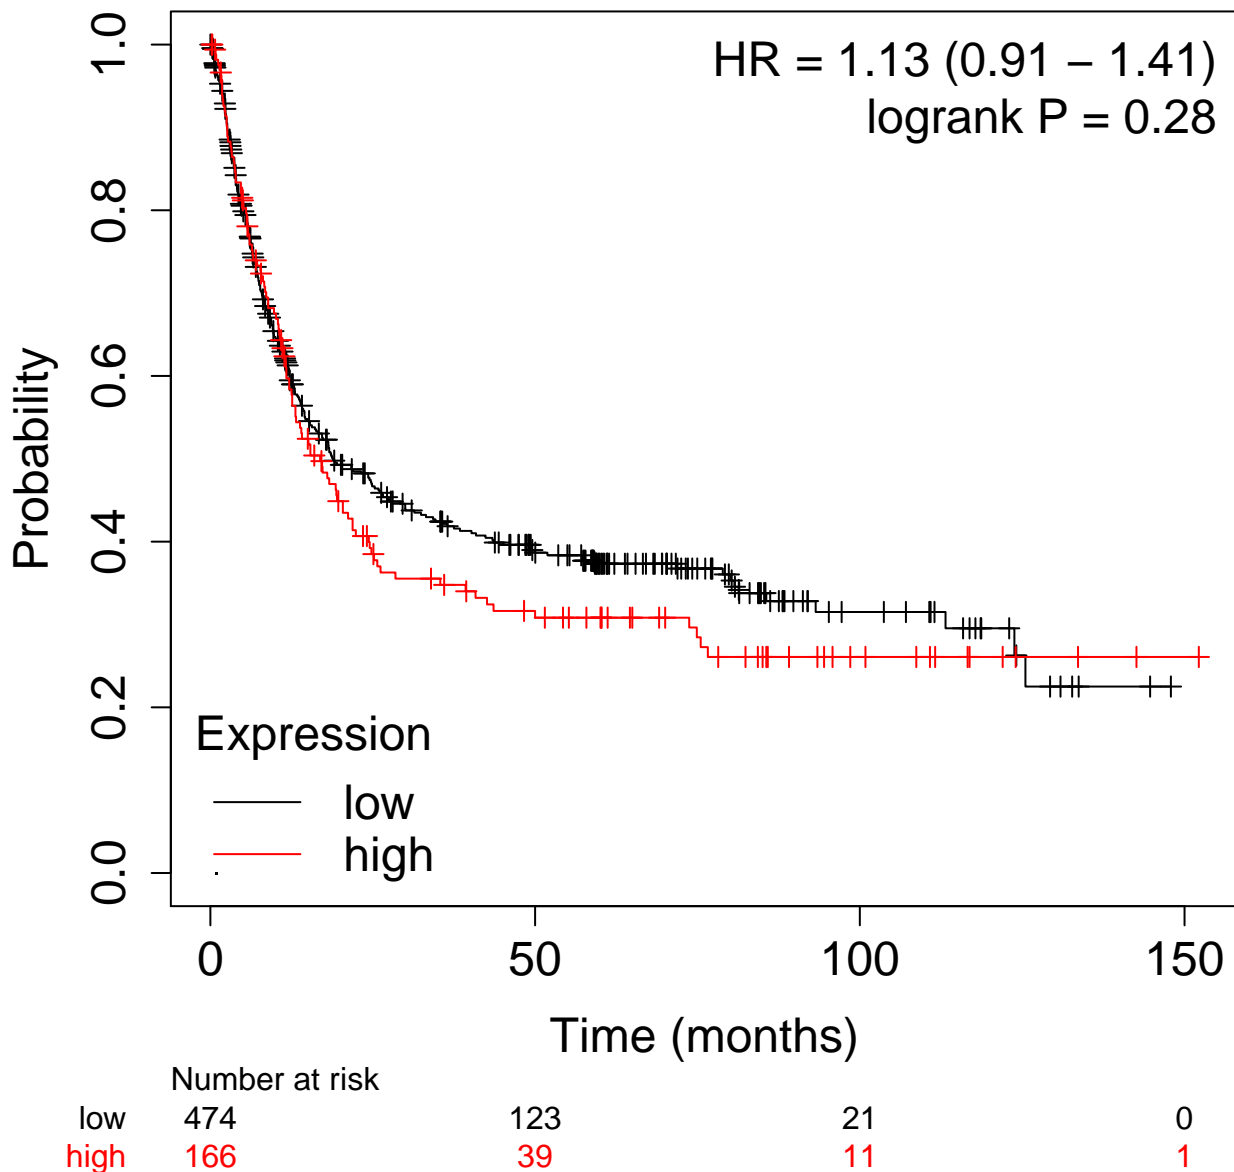

Supplement: Data_Sheet_8.ZIP [file Data_Sheet_8.ZIP]

# Overall Survival

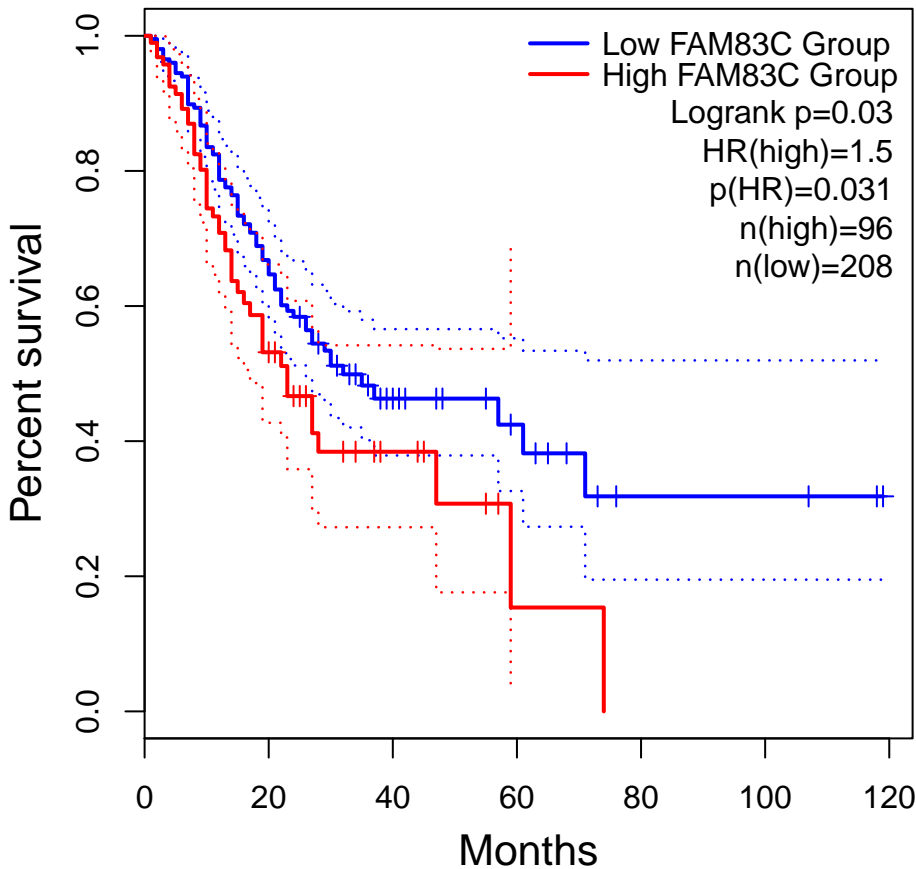

Supplement: Data_Sheet_9.ZIP [file Data_Sheet_9.ZIP]

# Disease Free Survival

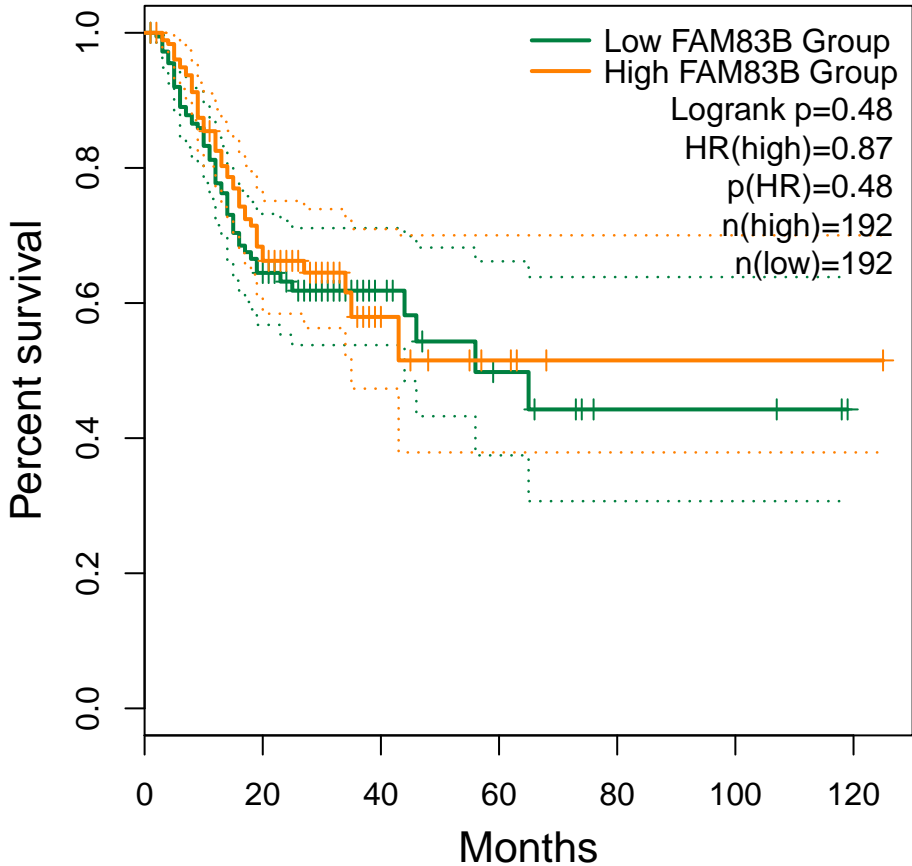

Supplement: Data_Sheet_9.ZIP [file Data_Sheet_9.ZIP]

# Disease Free Survival

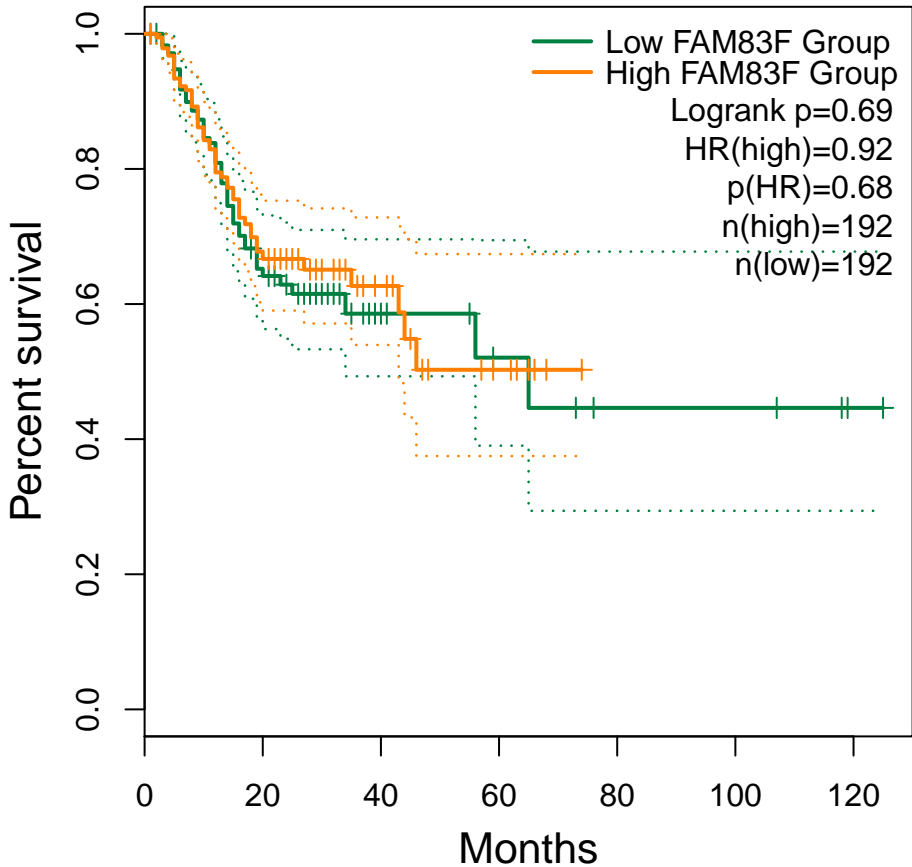

Supplement: Data_Sheet_9.ZIP [file Data_Sheet_9.ZIP]

# Disease Free Survival

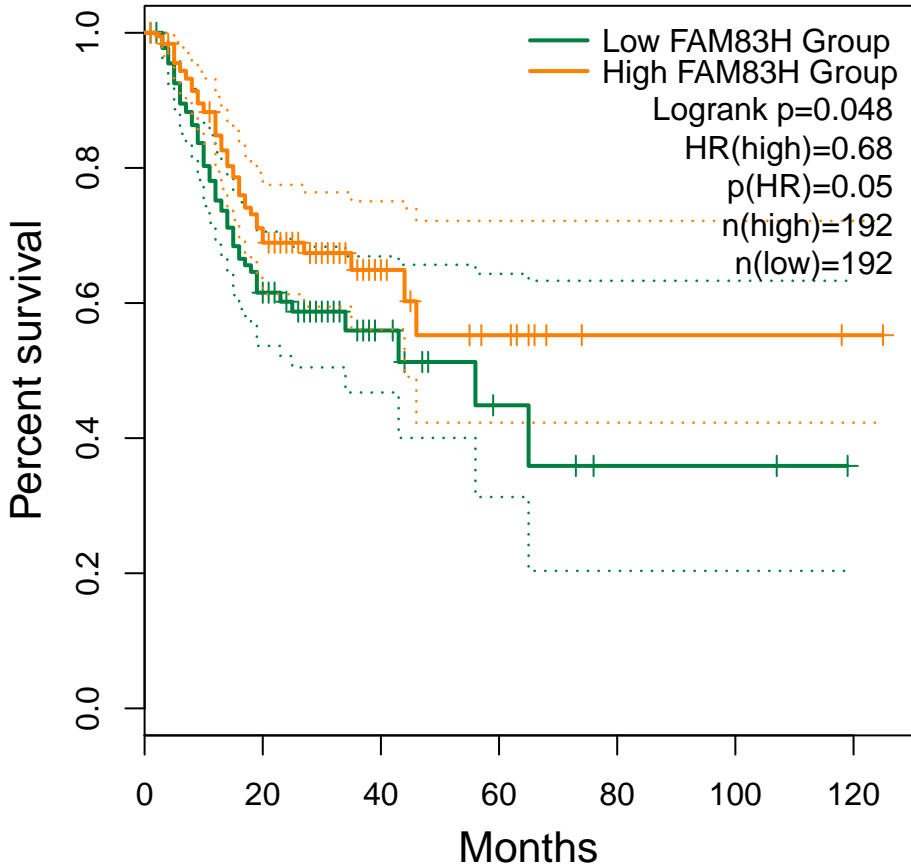

Supplement: Data_Sheet_9.ZIP [file Data_Sheet_9.ZIP]

# Overall Survival

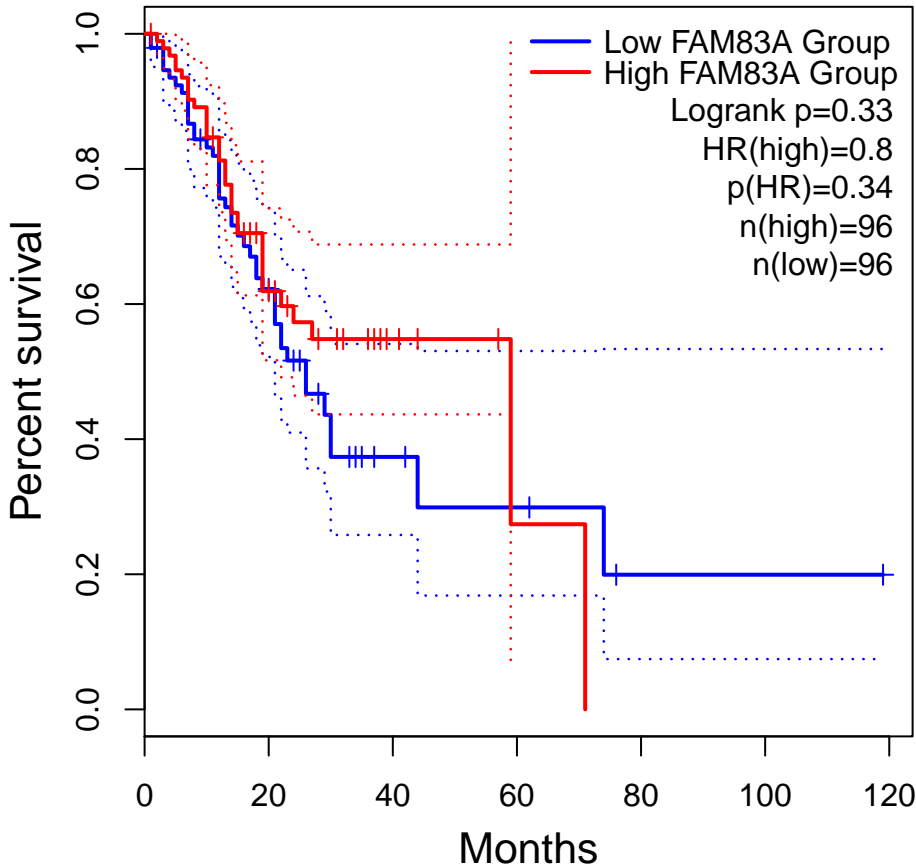

Supplement: Data_Sheet_9.ZIP [file Data_Sheet_9.ZIP]

# Overall Survival

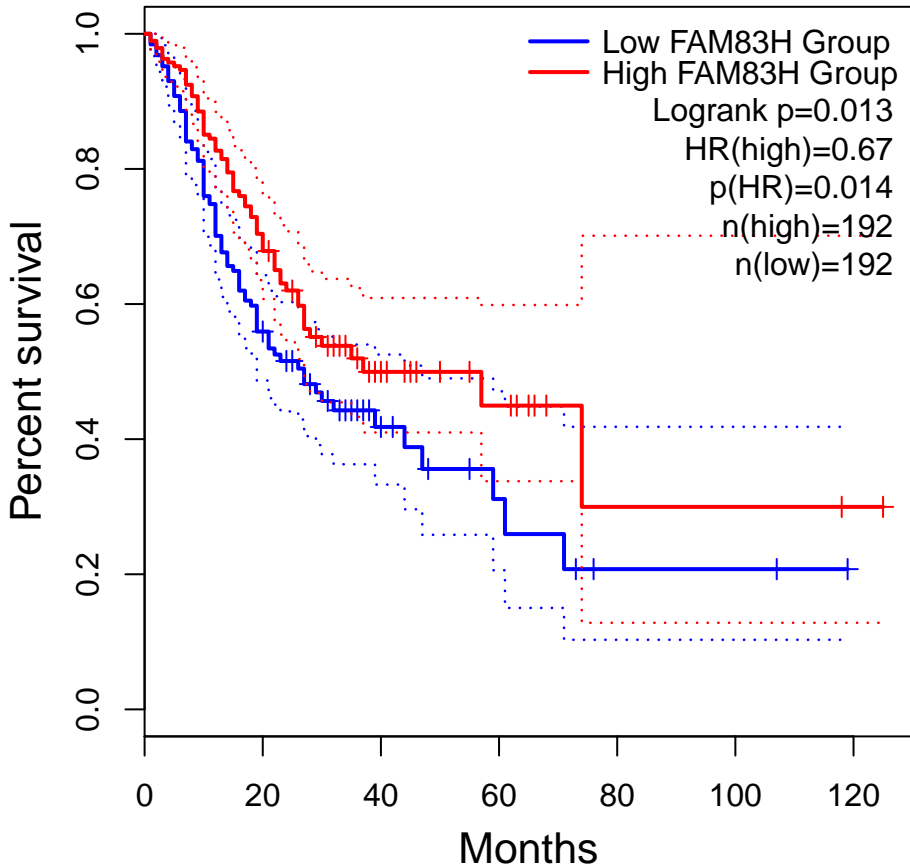

Supplement: Data_Sheet_9.ZIP [file Data_Sheet_9.ZIP]

# Disease Free Survival

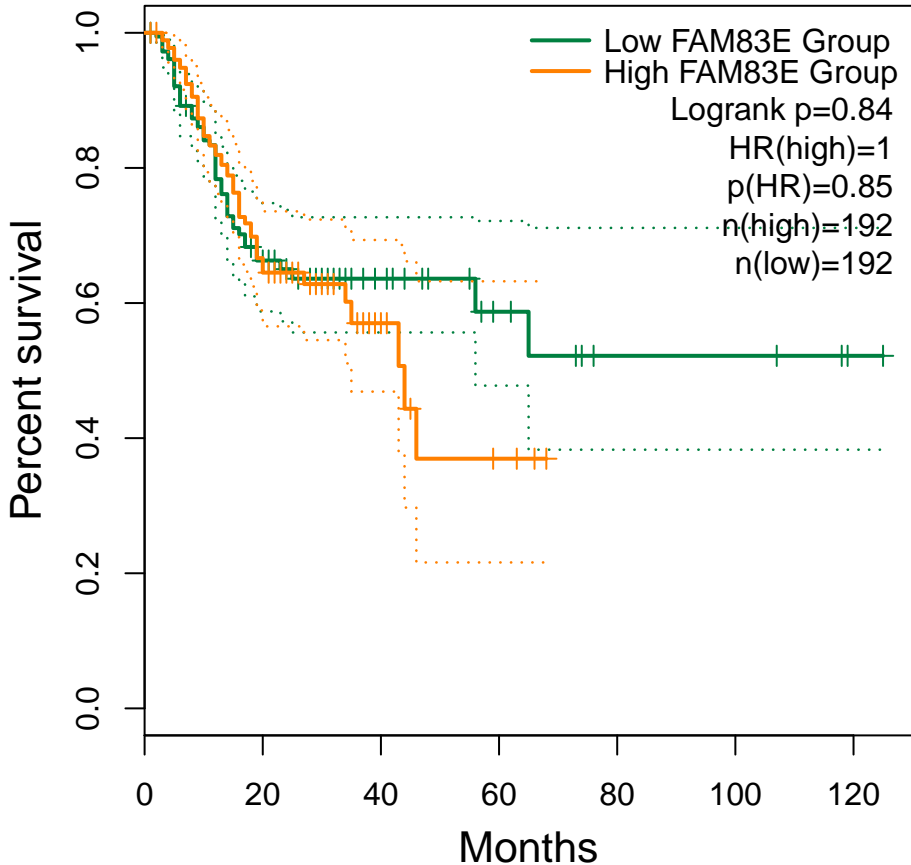

Supplement: Data_Sheet_9.ZIP [file Data_Sheet_9.ZIP]

# Overall Survival

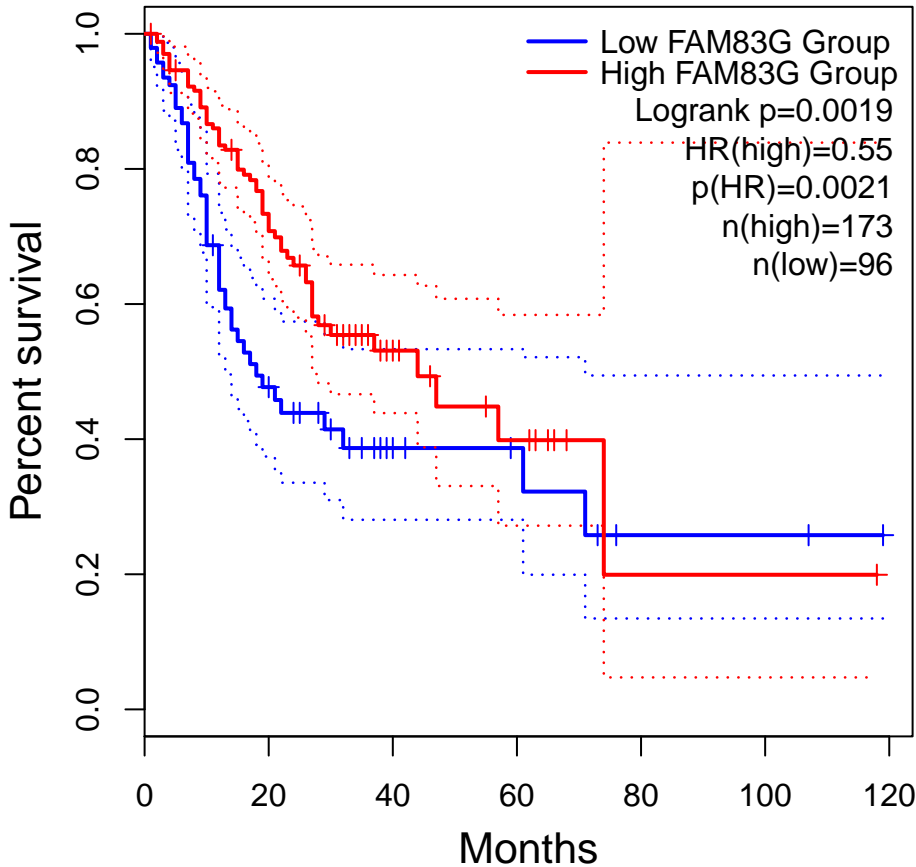

Supplement: Data_Sheet_9.ZIP [file Data_Sheet_9.ZIP]

# Overall Survival

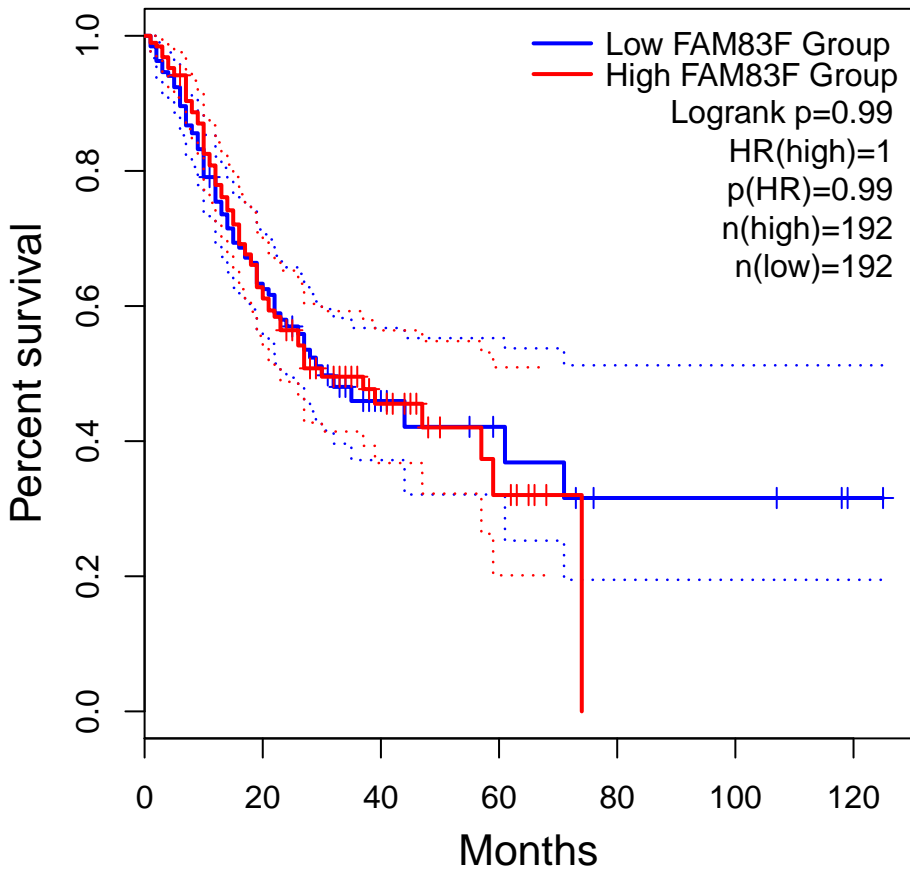

Supplement: Data_Sheet_9.ZIP [file Data_Sheet_9.ZIP]

# Disease Free Survival

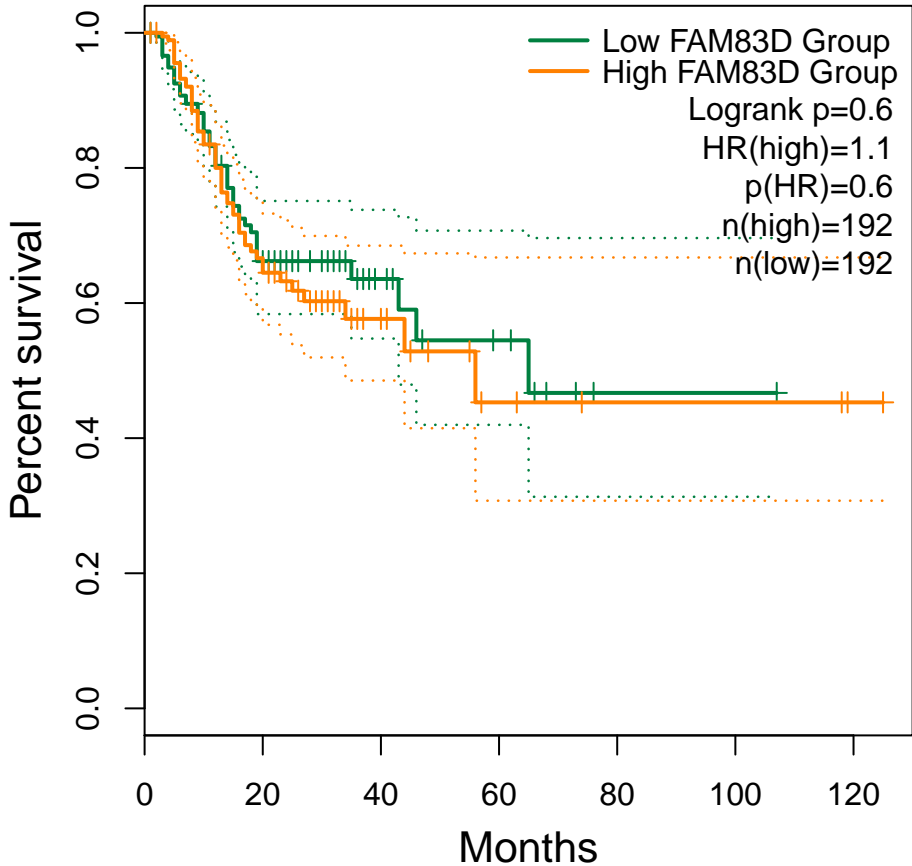

Supplement: Data_Sheet_9.ZIP [file Data_Sheet_9.ZIP]

# Disease Free Survival

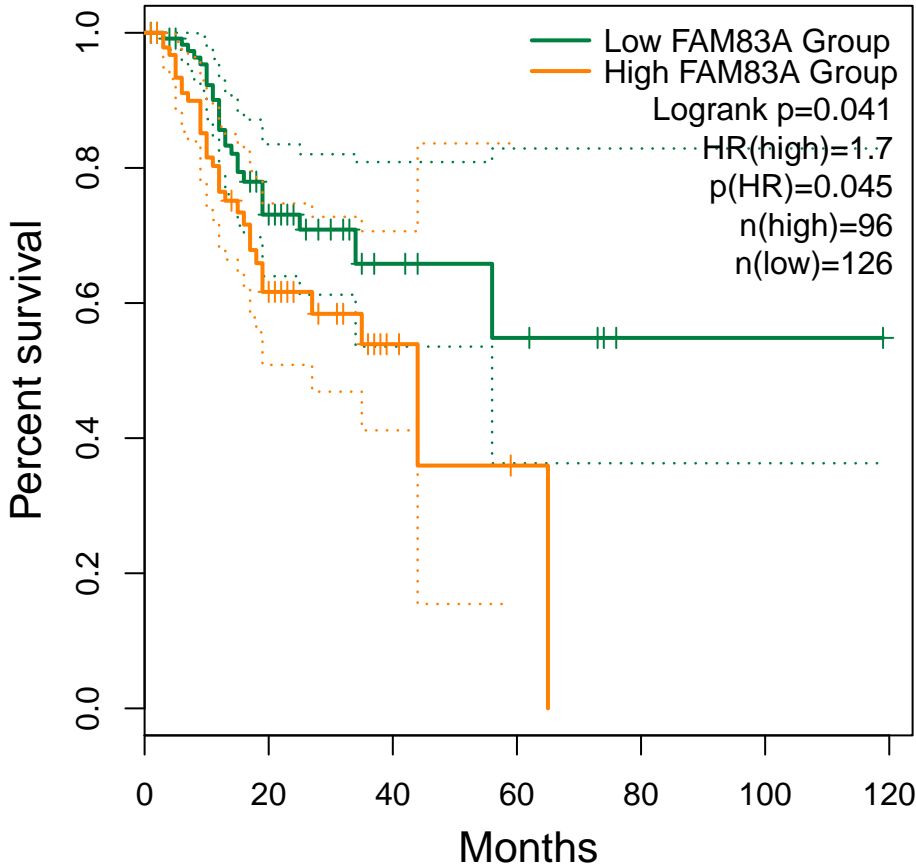

Supplement: Data_Sheet_9.ZIP [file Data_Sheet_9.ZIP]

# Overall Survival

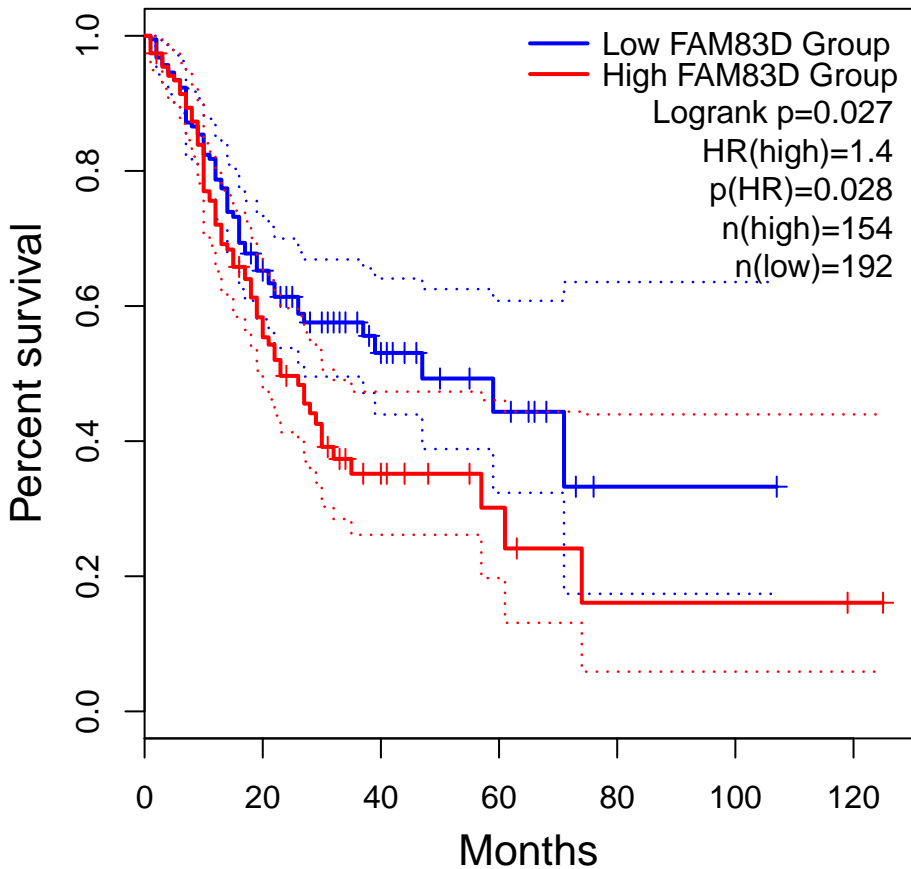

Supplement: Data_Sheet_9.ZIP [file Data_Sheet_9.ZIP]

# Disease Free Survival

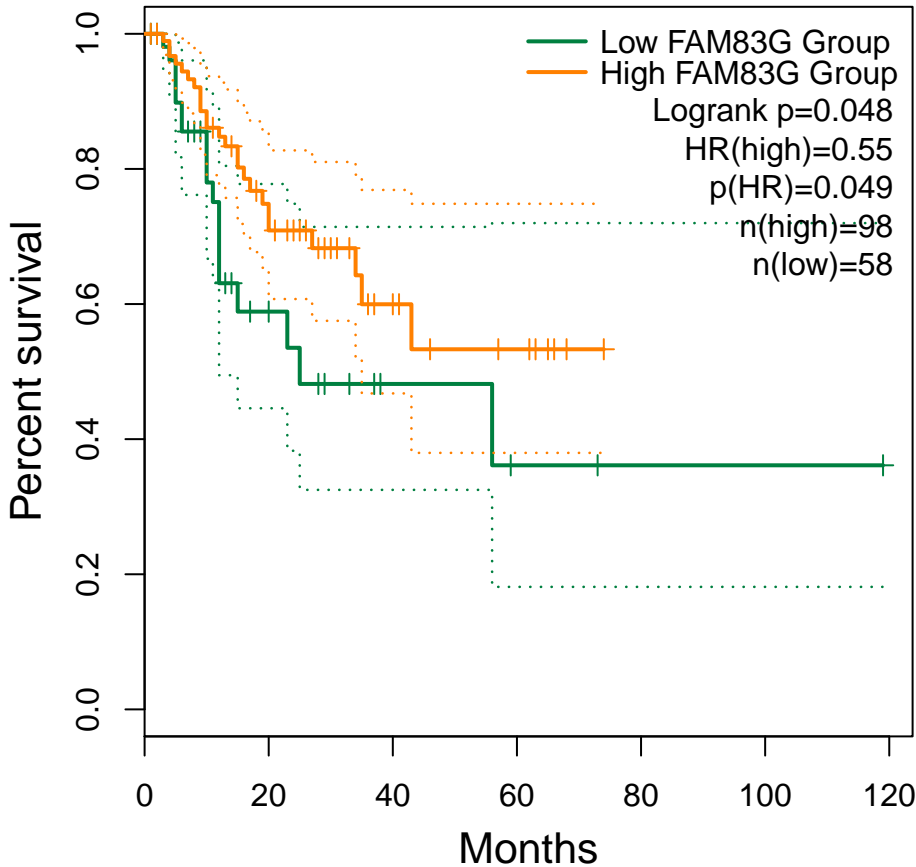

Supplement: Data_Sheet_9.ZIP [file Data_Sheet_9.ZIP]

# Disease Free Survival

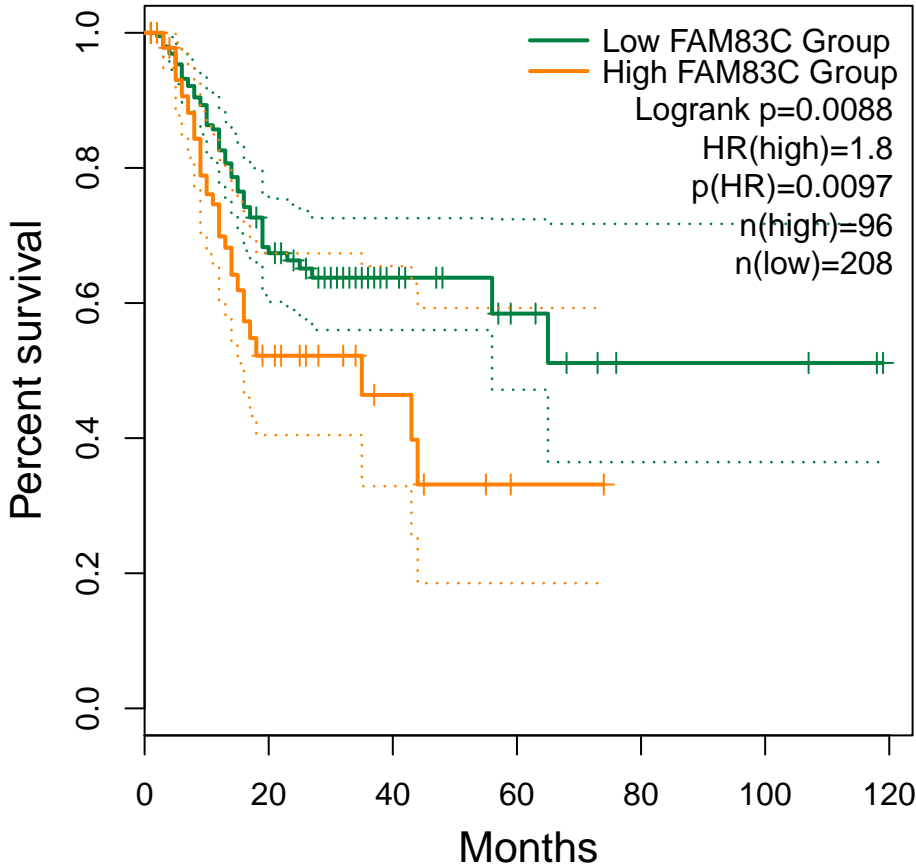

Supplement: Data_Sheet_9.ZIP [file Data_Sheet_9.ZIP]

# Overall Survival

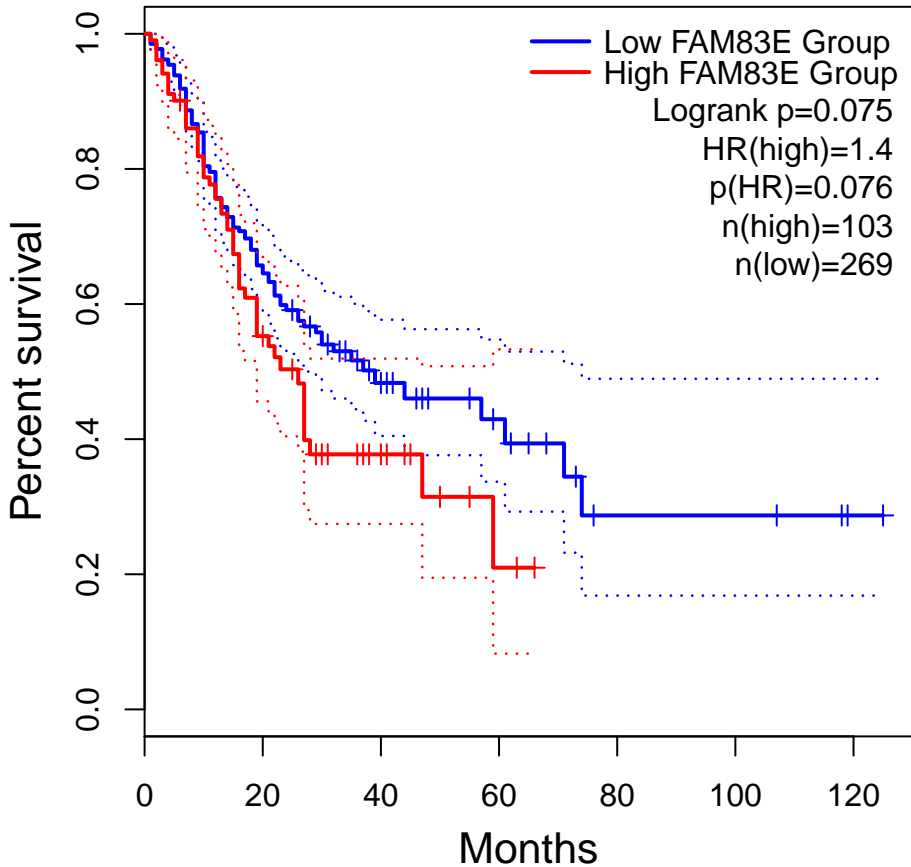

Supplement: Data_Sheet_9.ZIP [file Data_Sheet_9.ZIP]

# Overall Survival

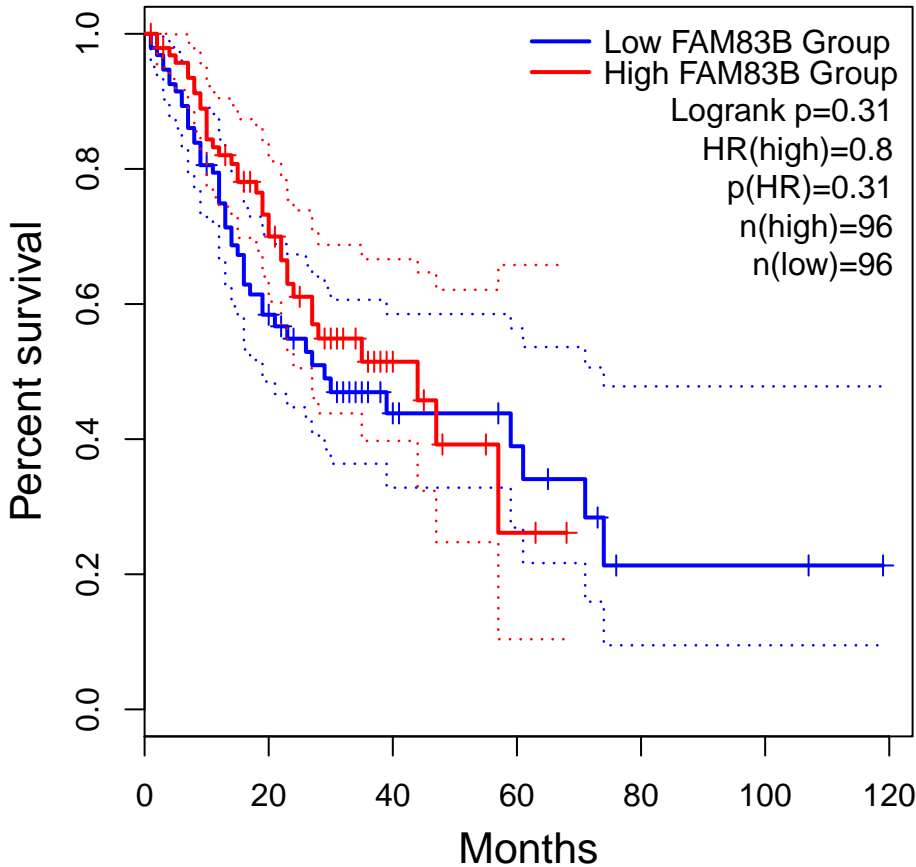

Supplement: Data_Sheet_9.ZIP [file Data_Sheet_9.ZIP]
