# Supplementary figures and images for: Comprehensive Analysis and Identification of Prognostic Biomarkers and Therapeutic Targets Among FAM83 Family Members for Gastric Cancer (part 1 of 2)
Source: Frontiers journal article supplement (doi:10.3389/fcell.2021.719613), 2021-11-19

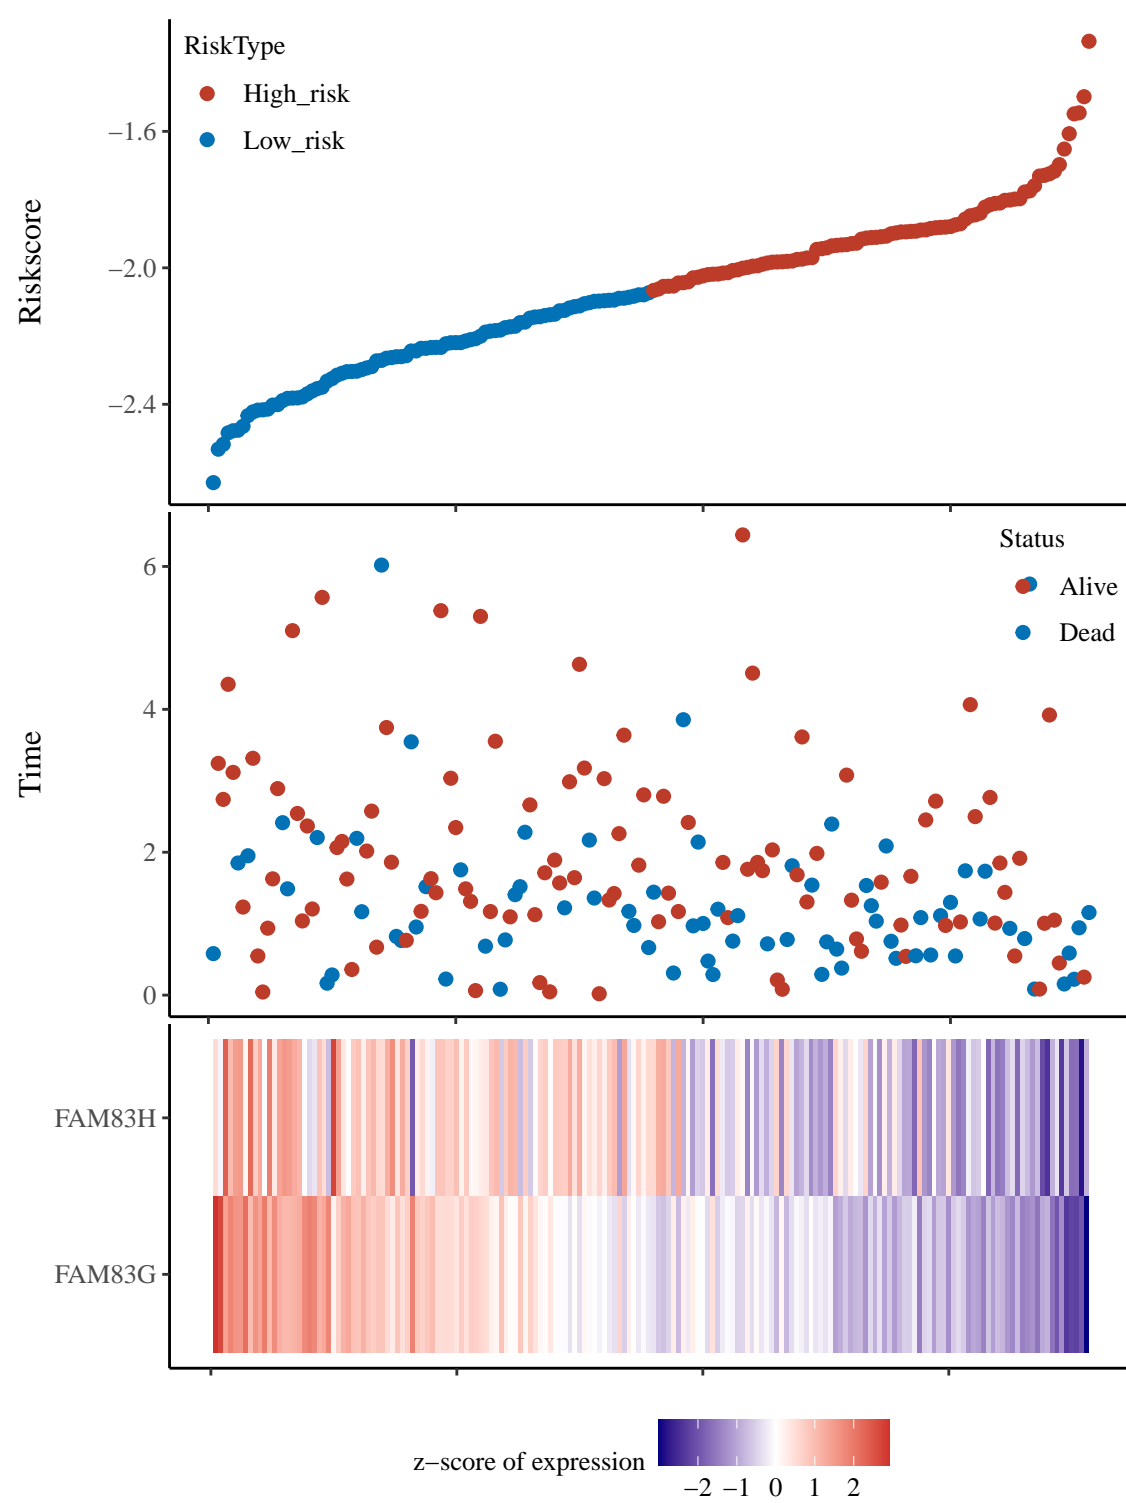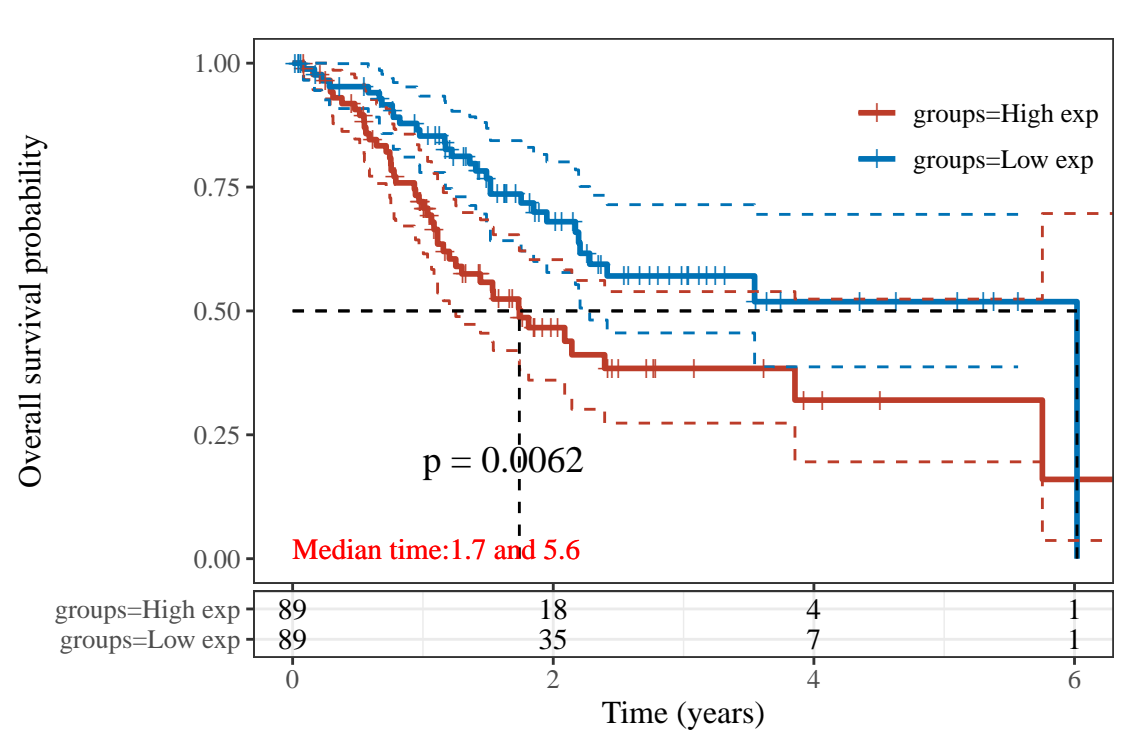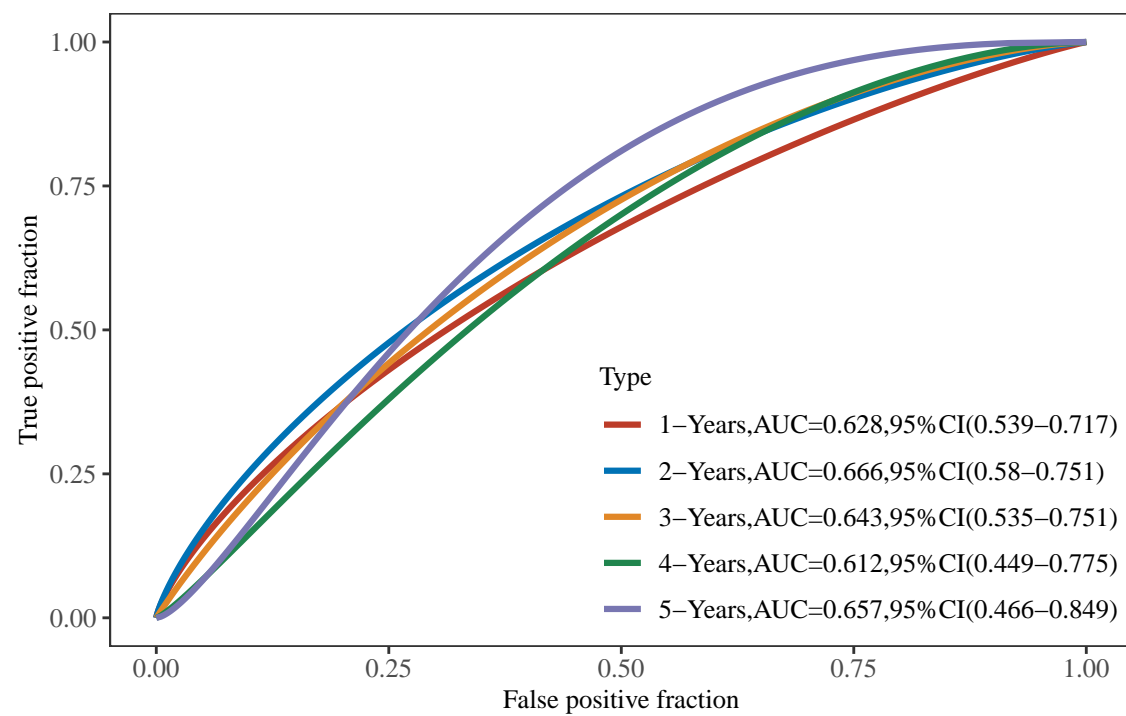

Supplement: Data_Sheet_10.ZIP [file Data_Sheet_10.ZIP]

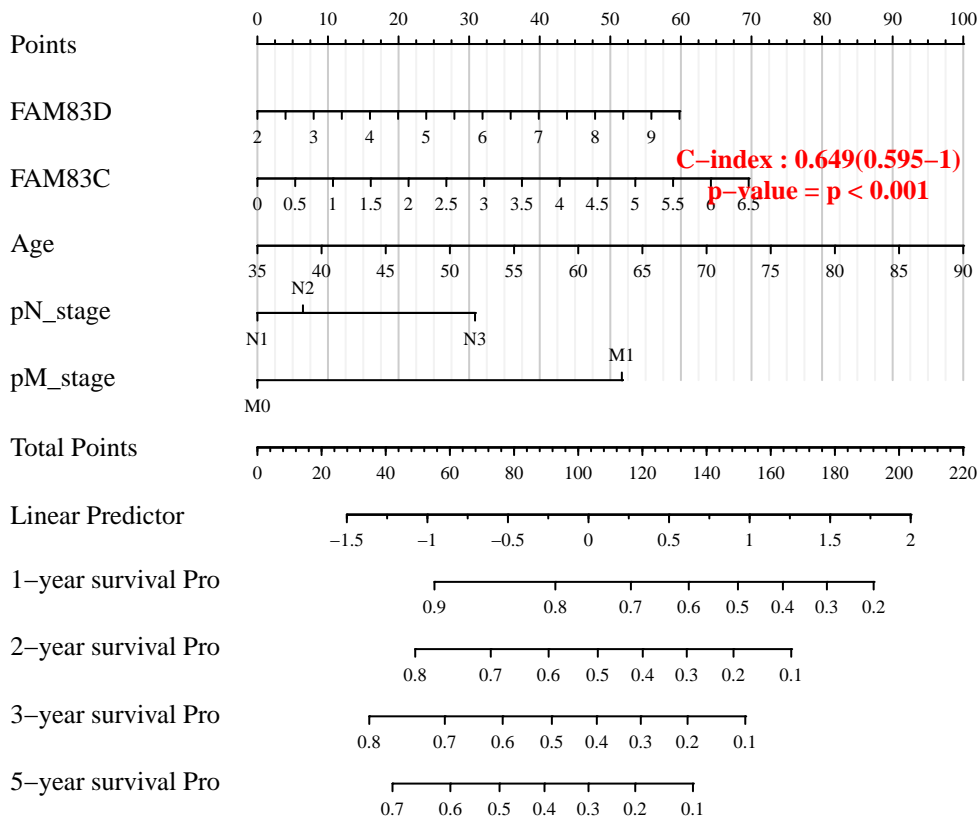

Supplement: Data_Sheet_10.ZIP [file Data_Sheet_10.ZIP]

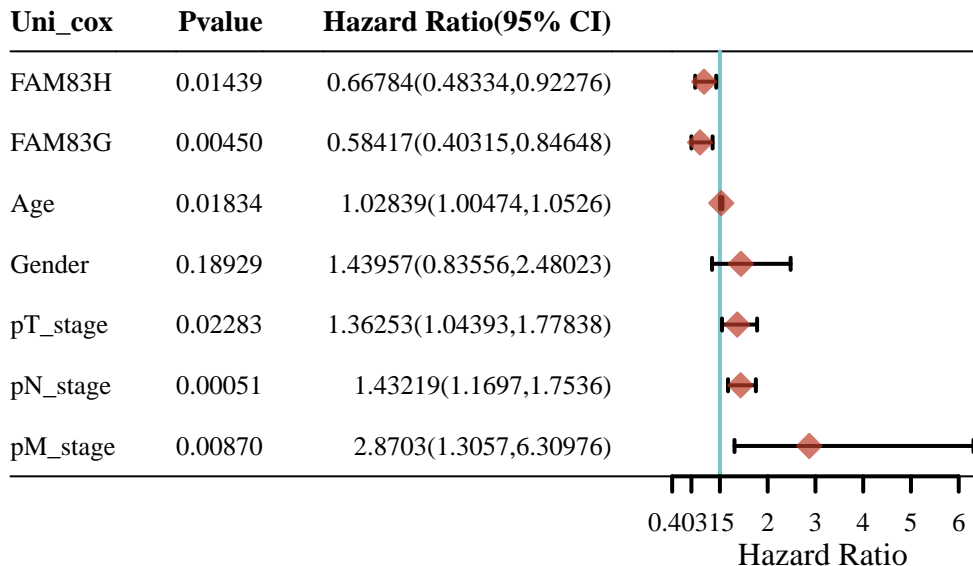

Supplement: Data_Sheet_10.ZIP [file Data_Sheet_10.ZIP]

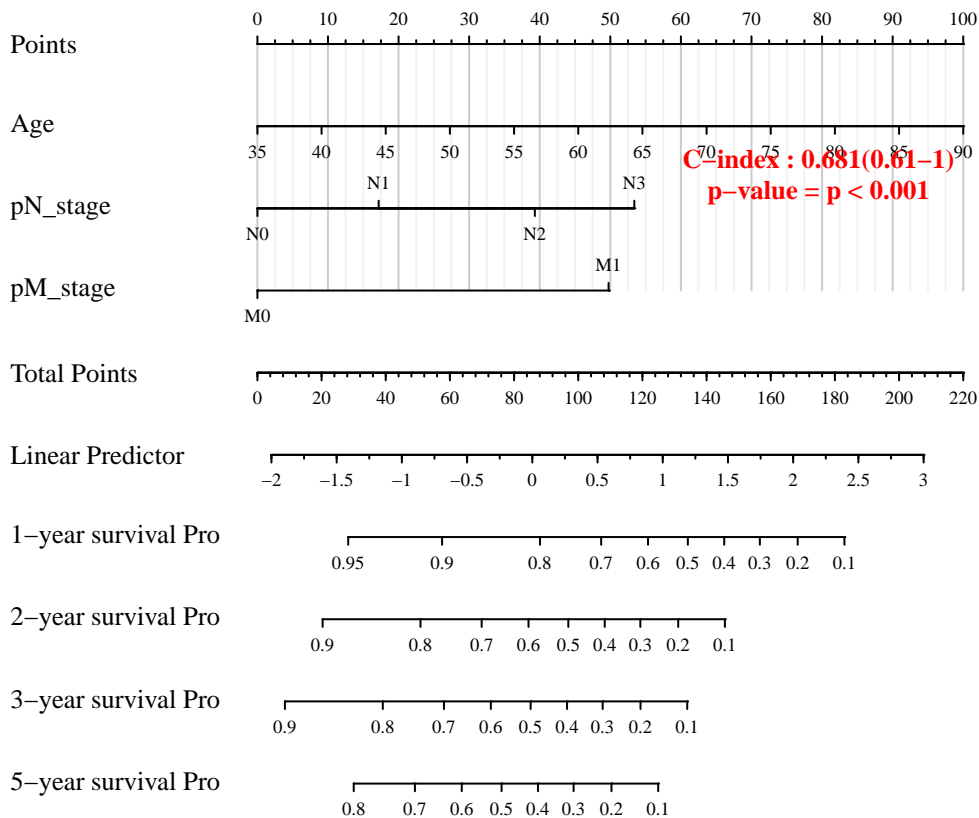

Supplement: Data_Sheet_10.ZIP [file Data_Sheet_10.ZIP]

Coefficients

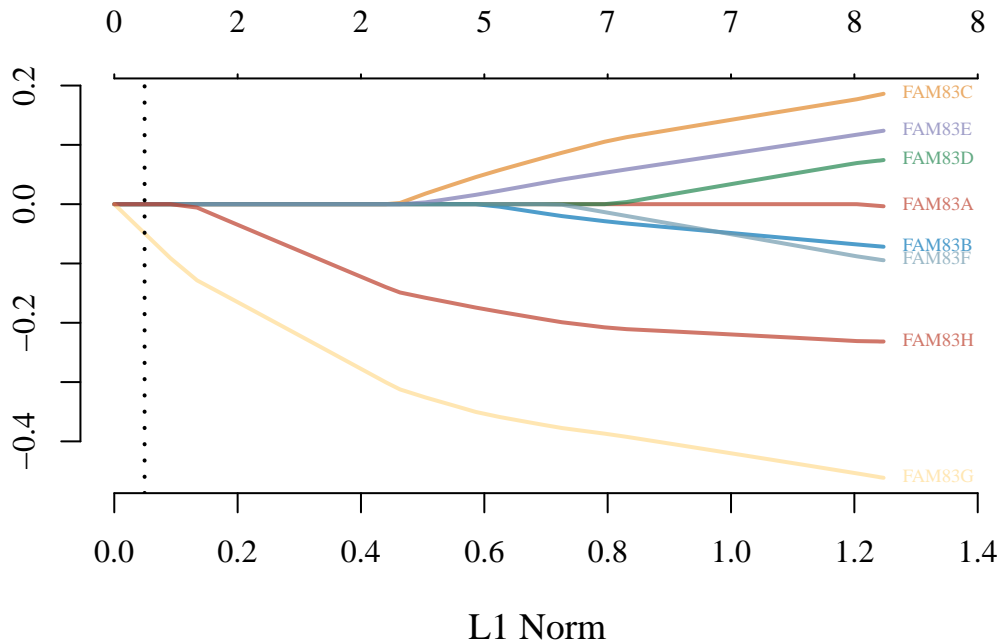

Supplement: Data_Sheet_10.ZIP [file Data_Sheet_10.ZIP]

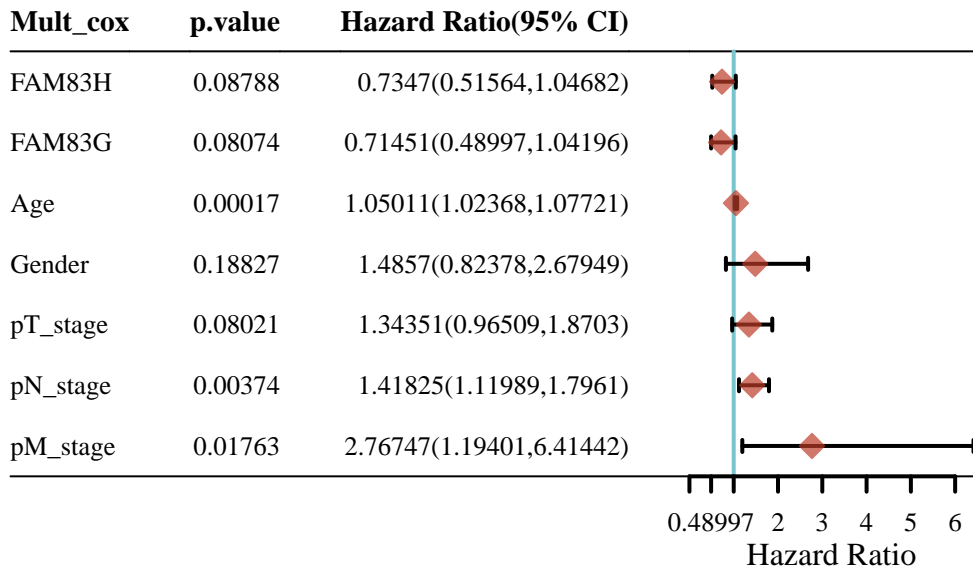

Supplement: Data_Sheet_10.ZIP [file Data_Sheet_10.ZIP]

Coefficients

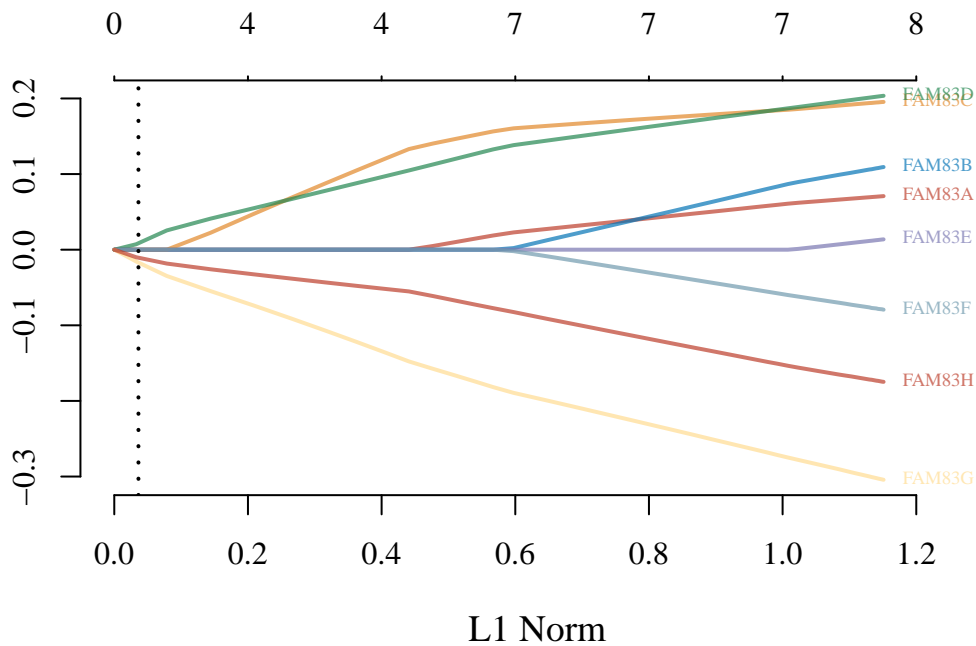

Supplement: Data_Sheet_10.ZIP [file Data_Sheet_10.ZIP]

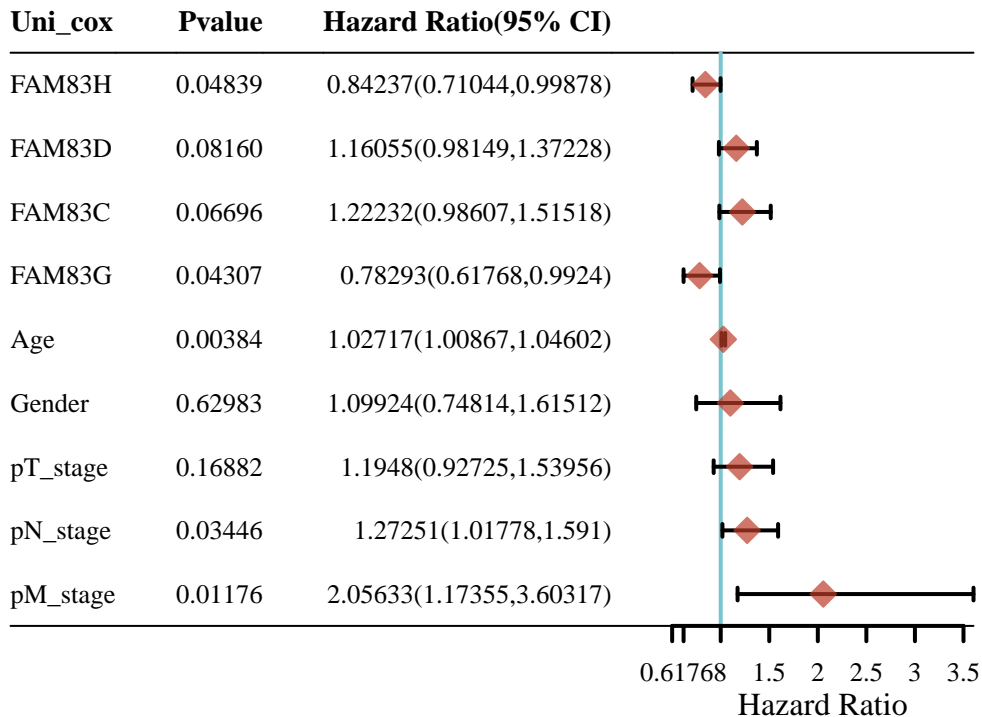

Supplement: Data_Sheet_10.ZIP [file Data_Sheet_10.ZIP]

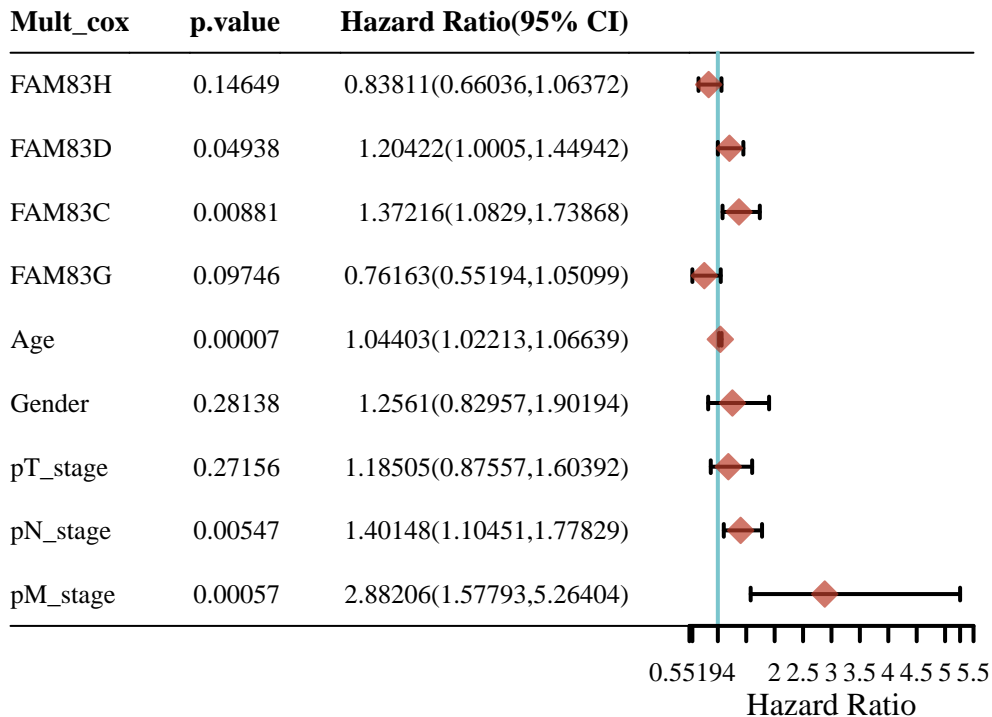

Supplement: Data_Sheet_10.ZIP [file Data_Sheet_10.ZIP]

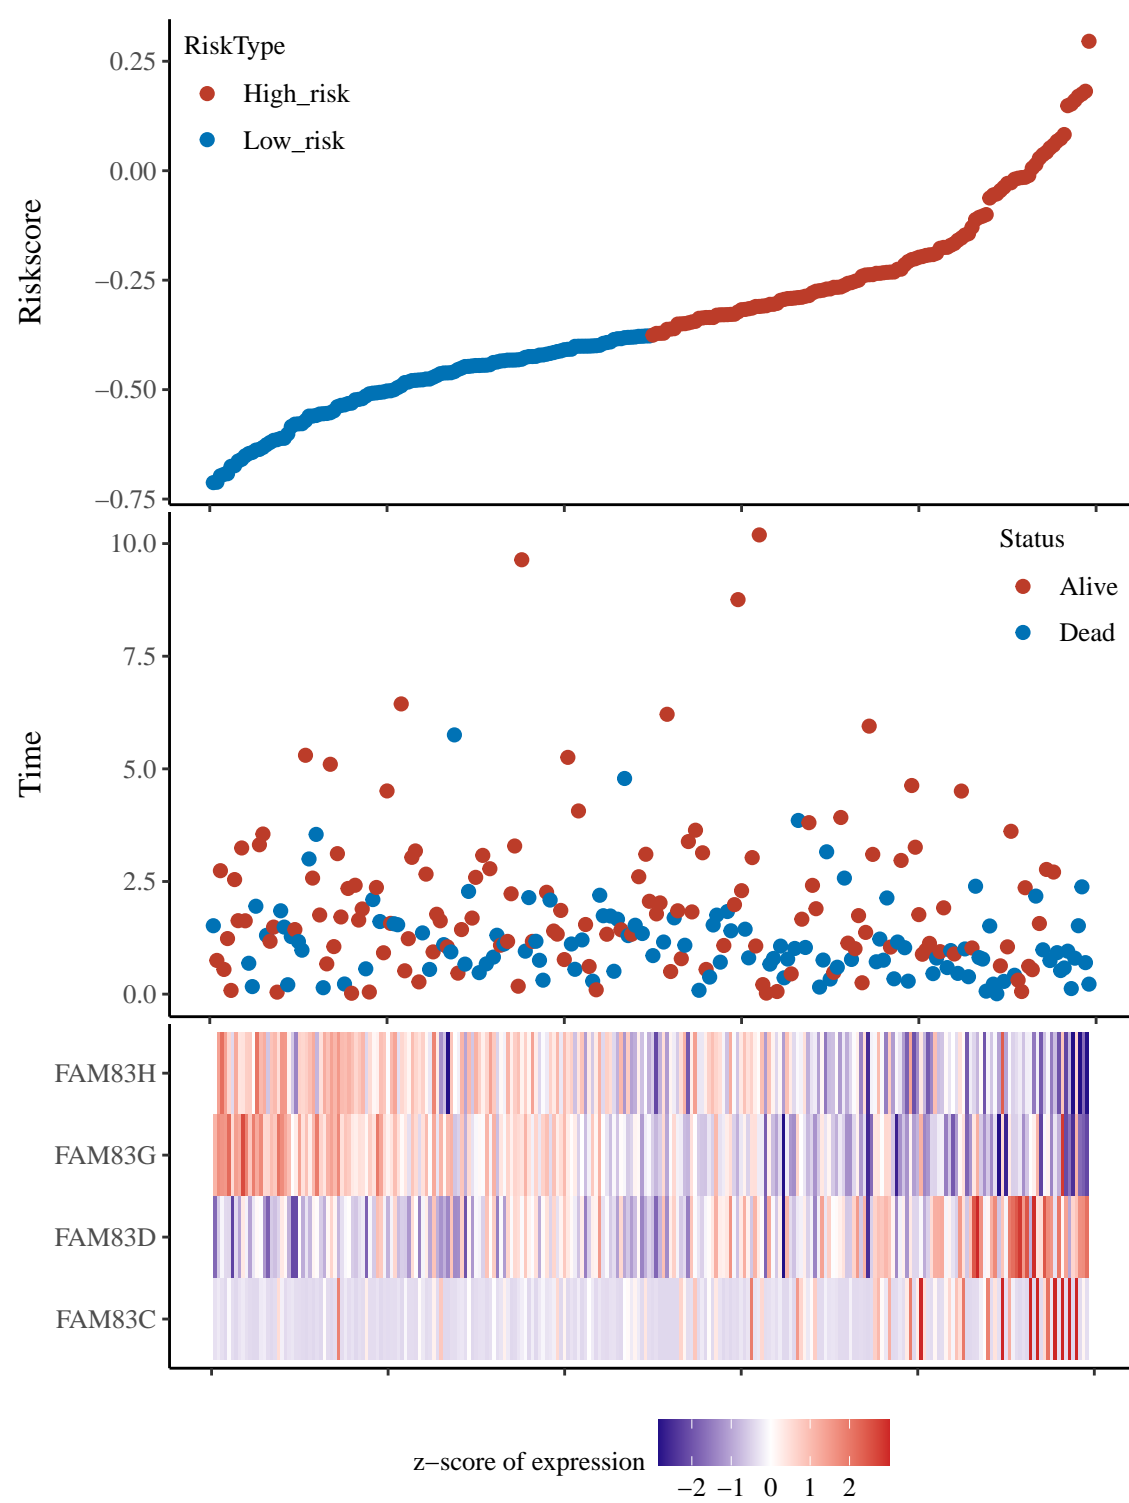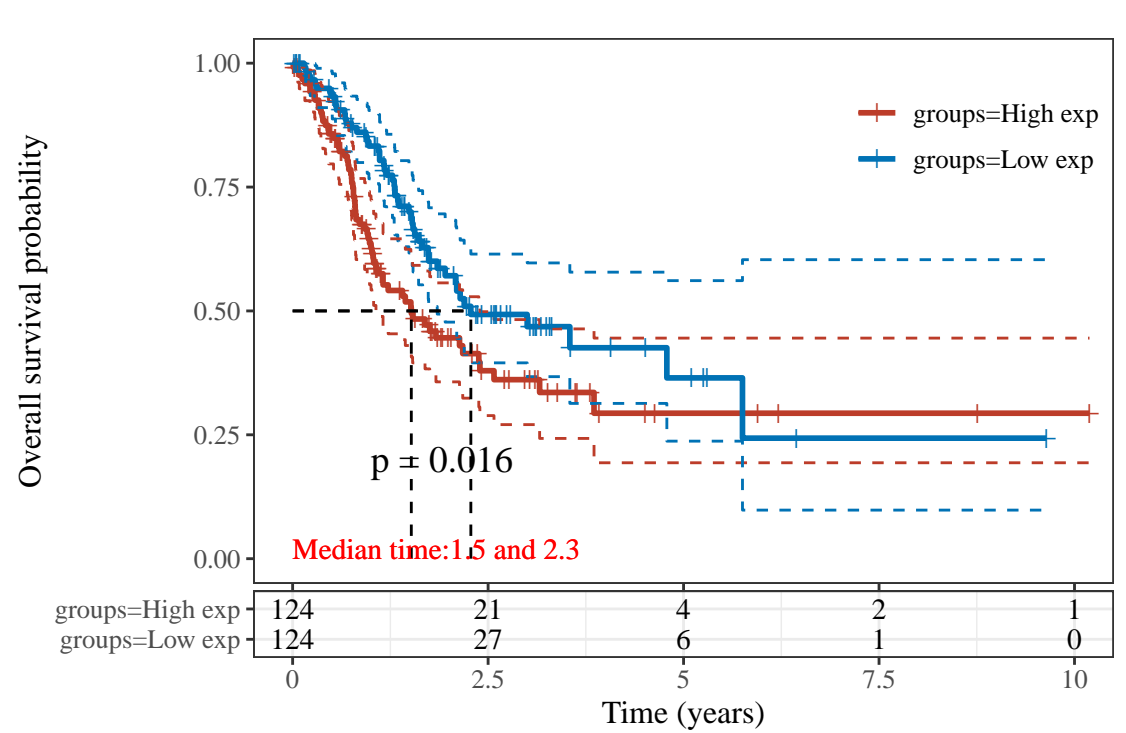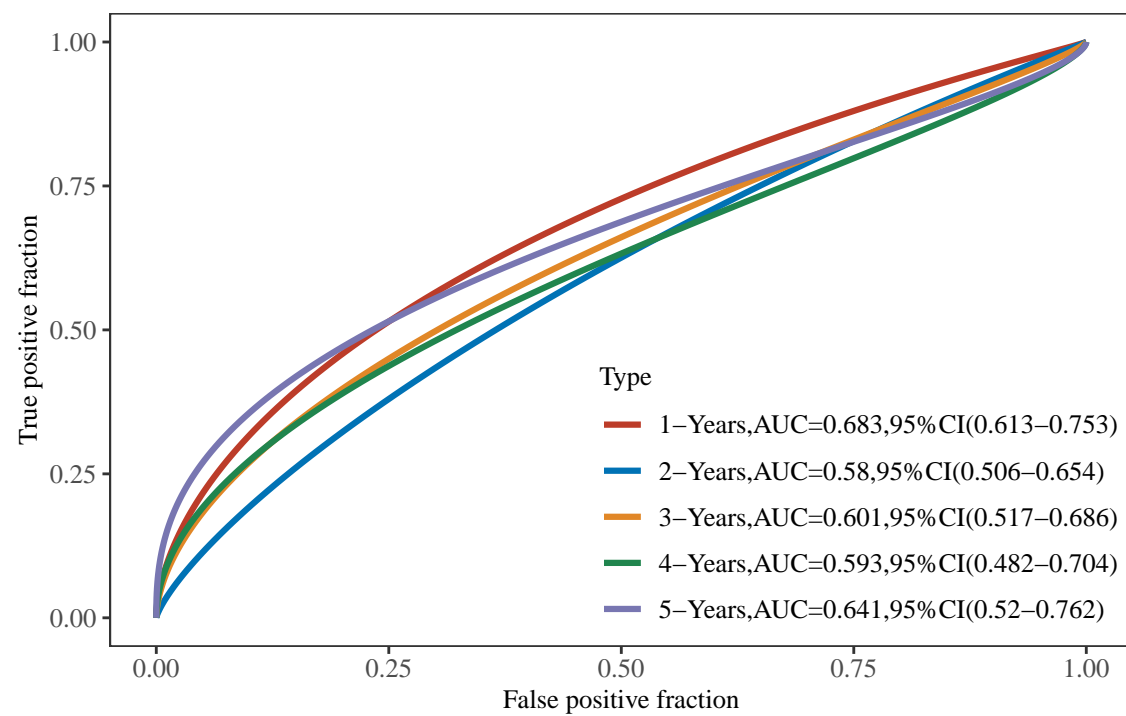

Supplement: Data_Sheet_10.ZIP [file Data_Sheet_10.ZIP]

Partial Likelihood Deviance

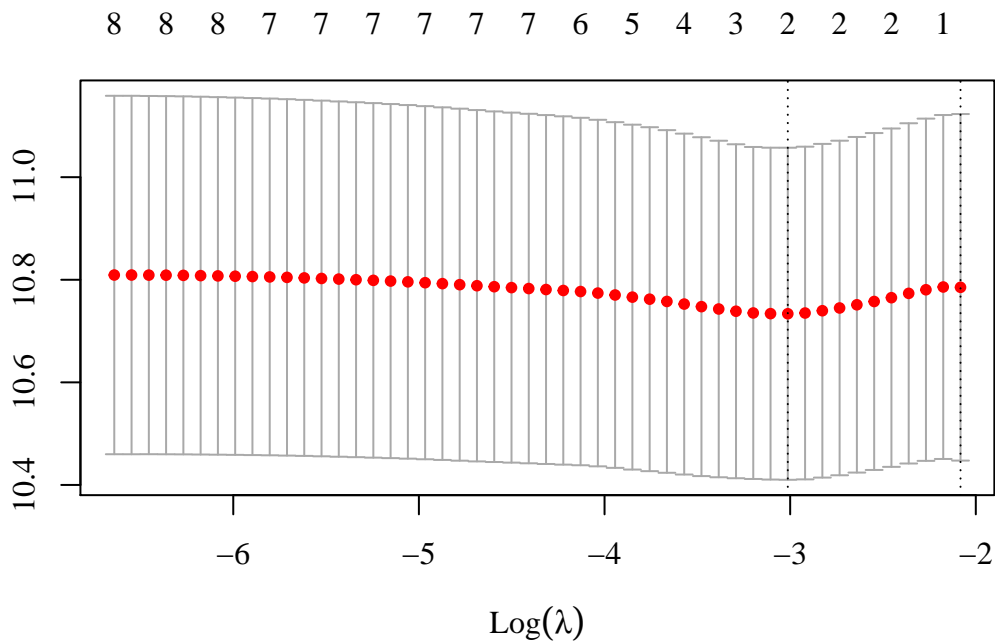

Supplement: Data_Sheet_10.ZIP [file Data_Sheet_10.ZIP]

Partial Likelihood Deviance

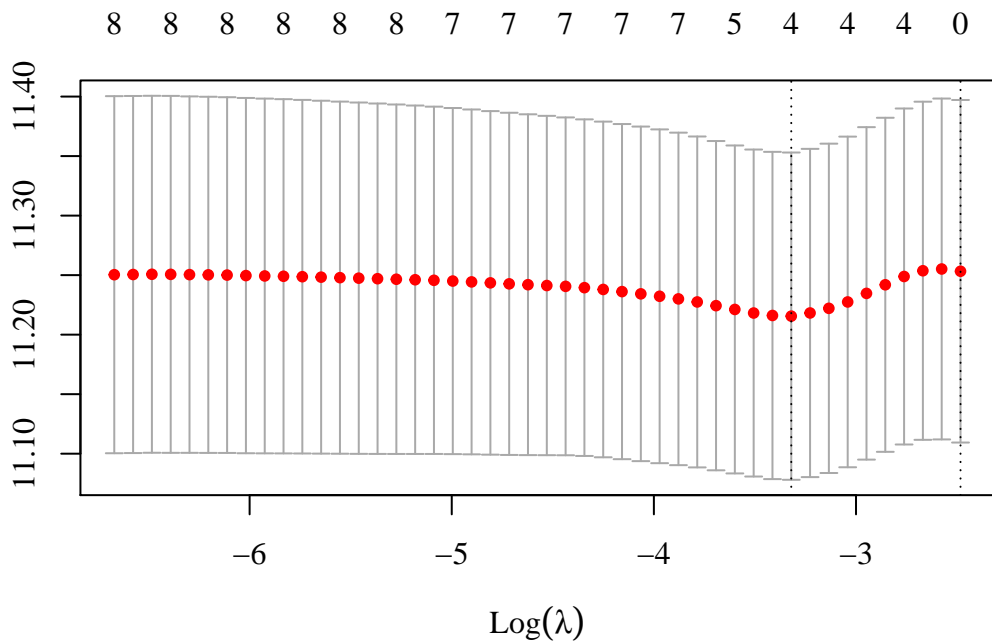

Supplement: Data_Sheet_10.ZIP [file Data_Sheet_10.ZIP]

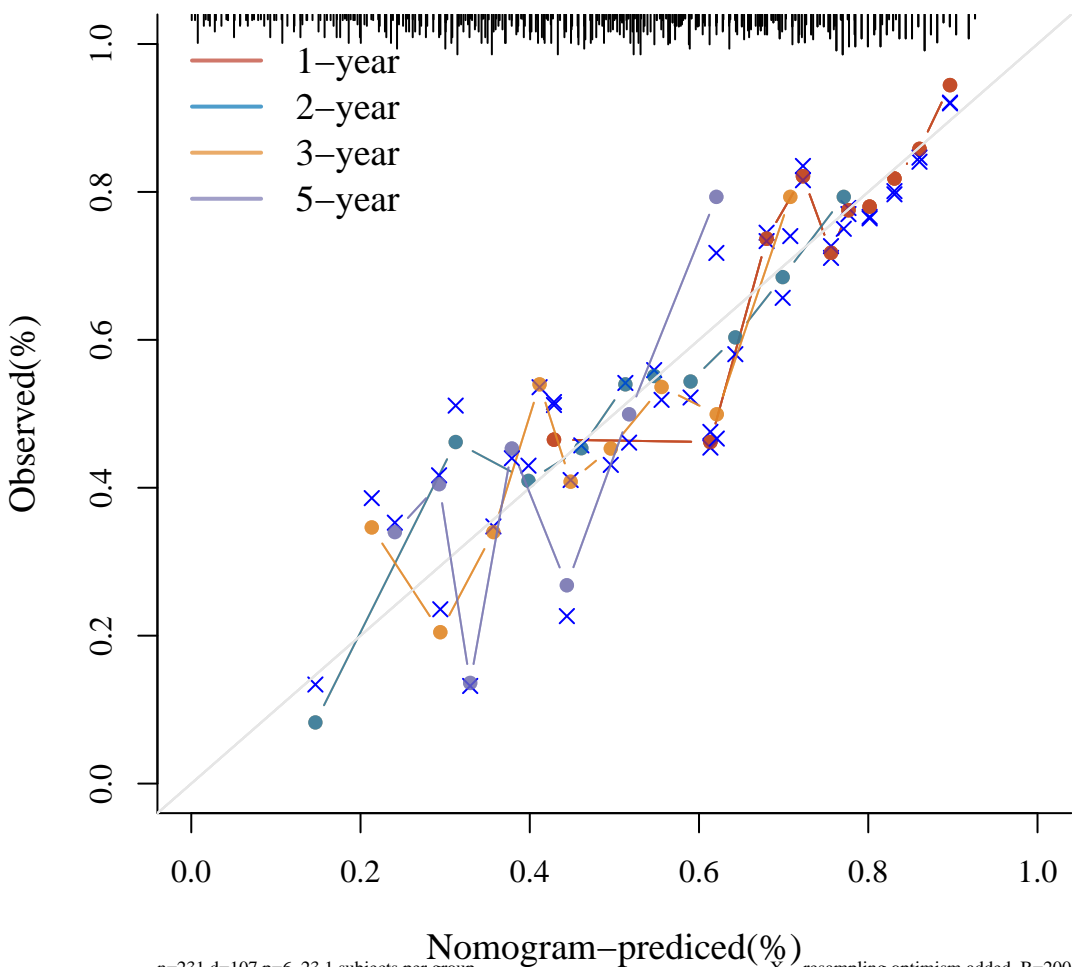

Supplement: Data_Sheet_10.ZIP [file Data_Sheet_10.ZIP]

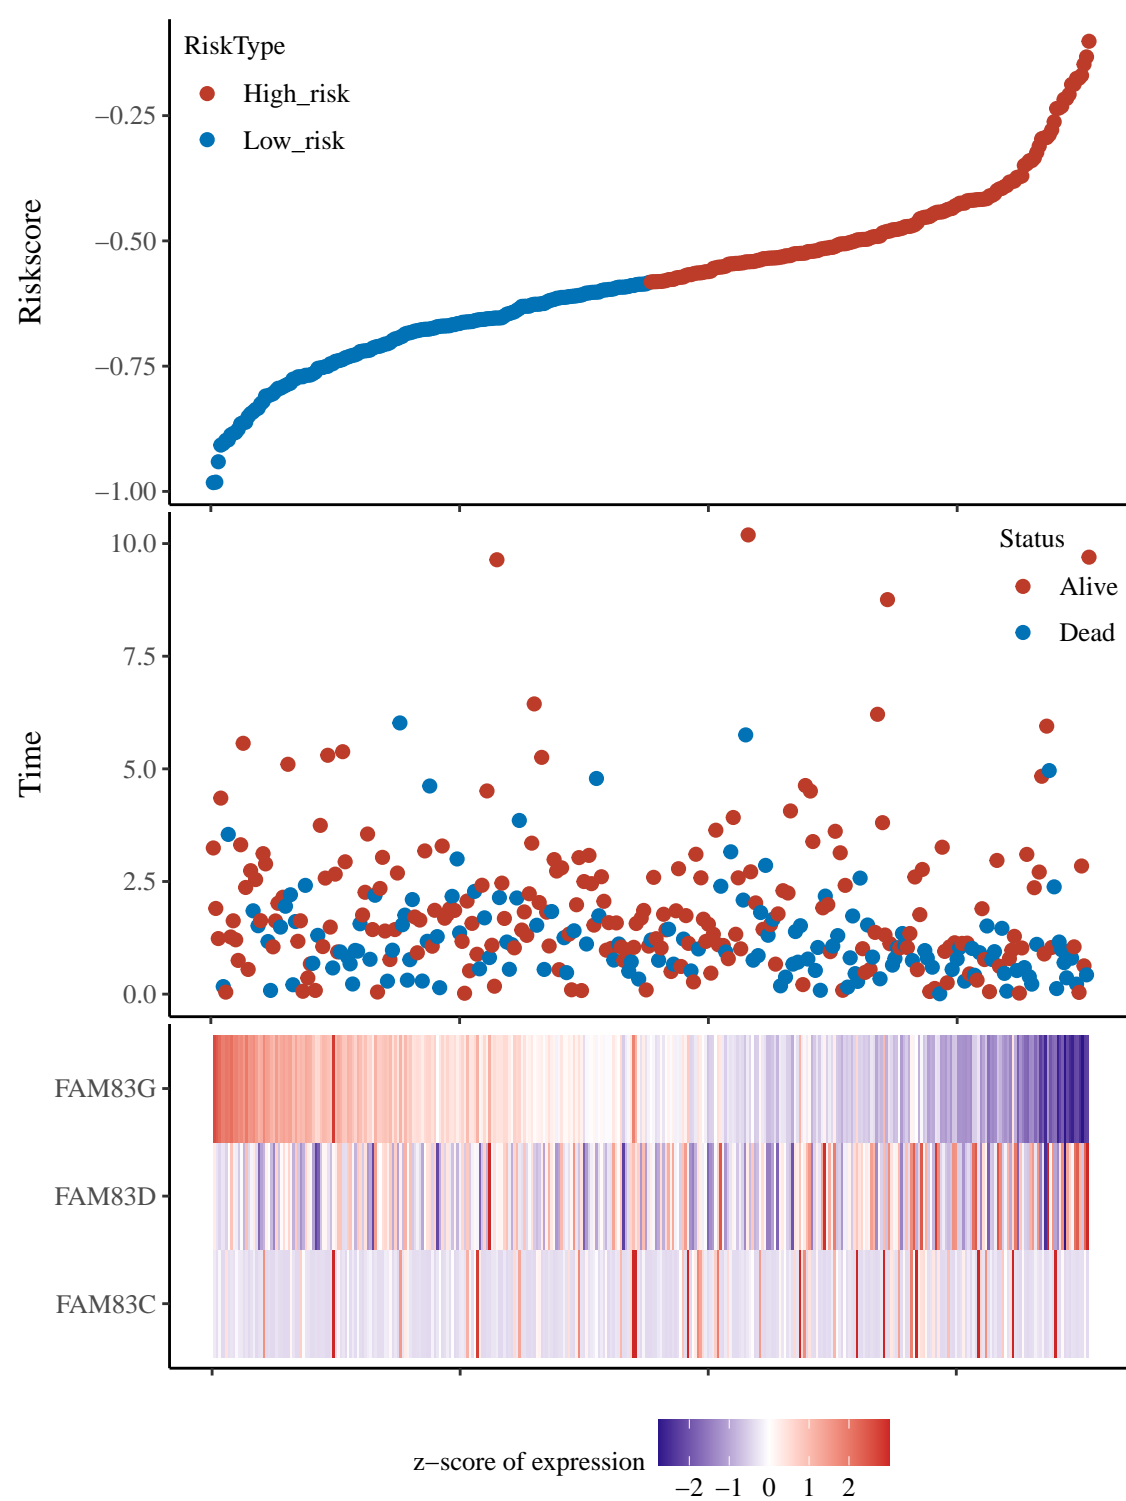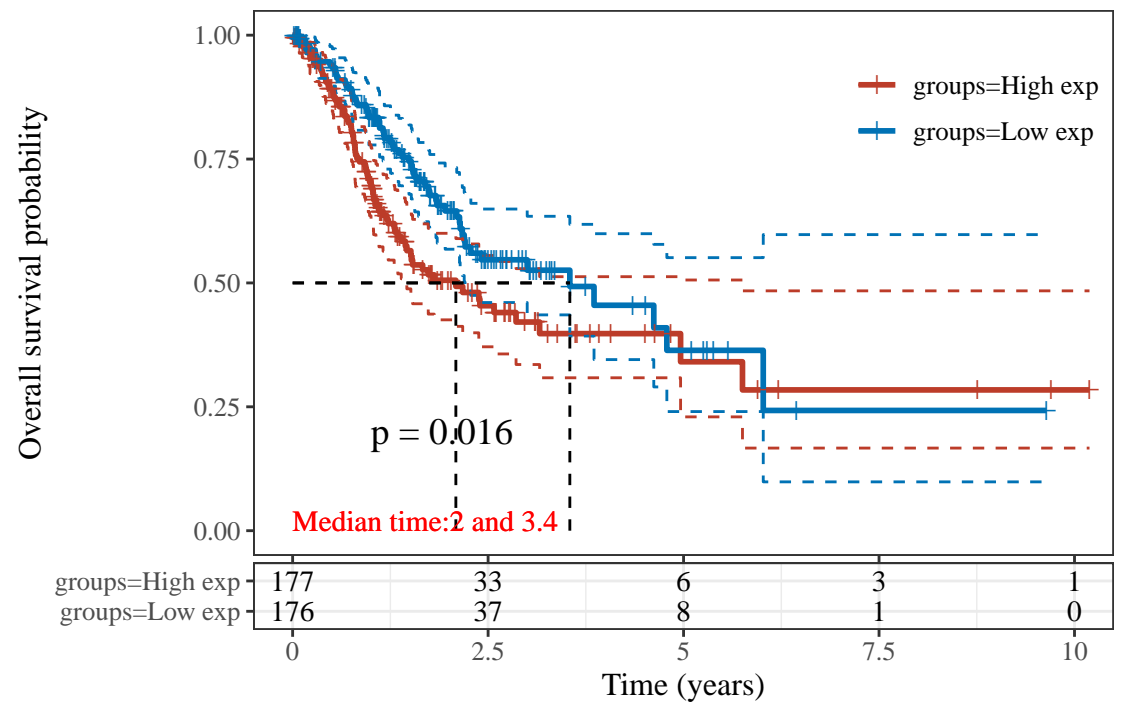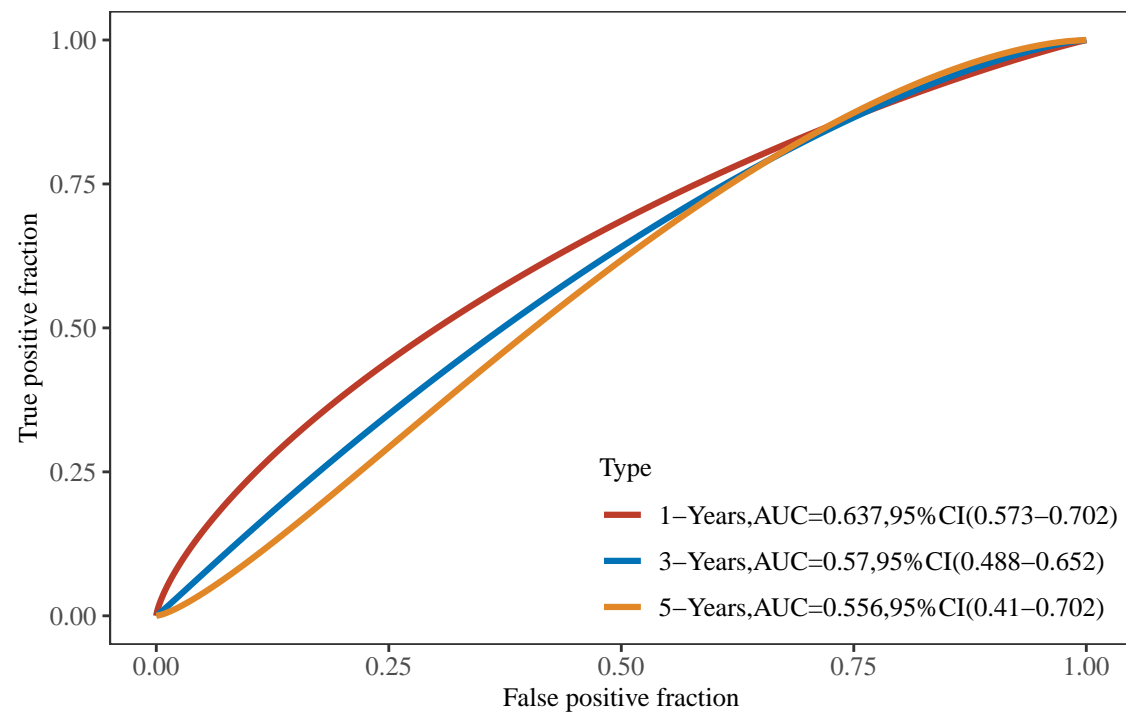

Supplement: Data_Sheet_11.ZIP [file Data_Sheet_11.ZIP]

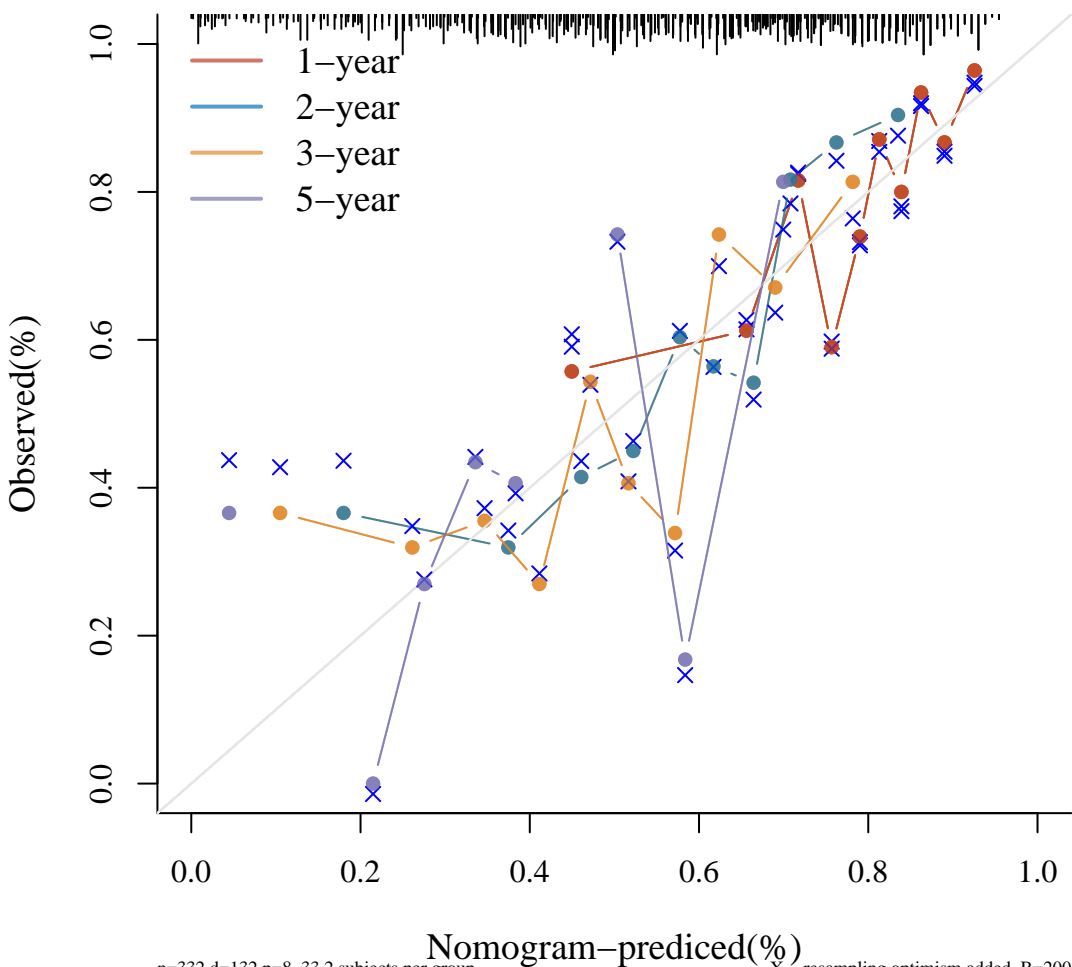

Supplement: Data_Sheet_11.ZIP [file Data_Sheet_11.ZIP]

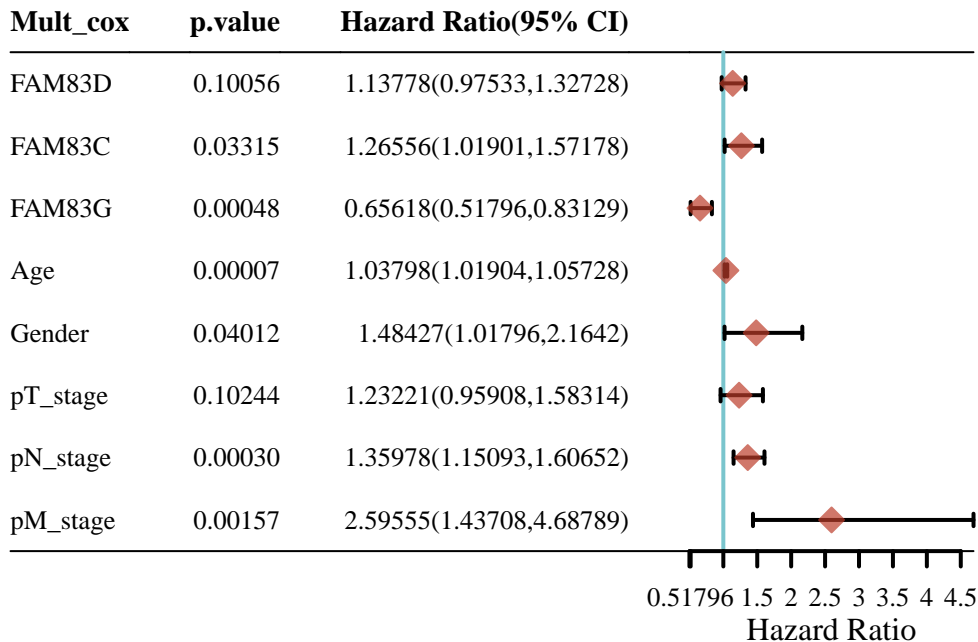

Supplement: Data_Sheet_11.ZIP [file Data_Sheet_11.ZIP]

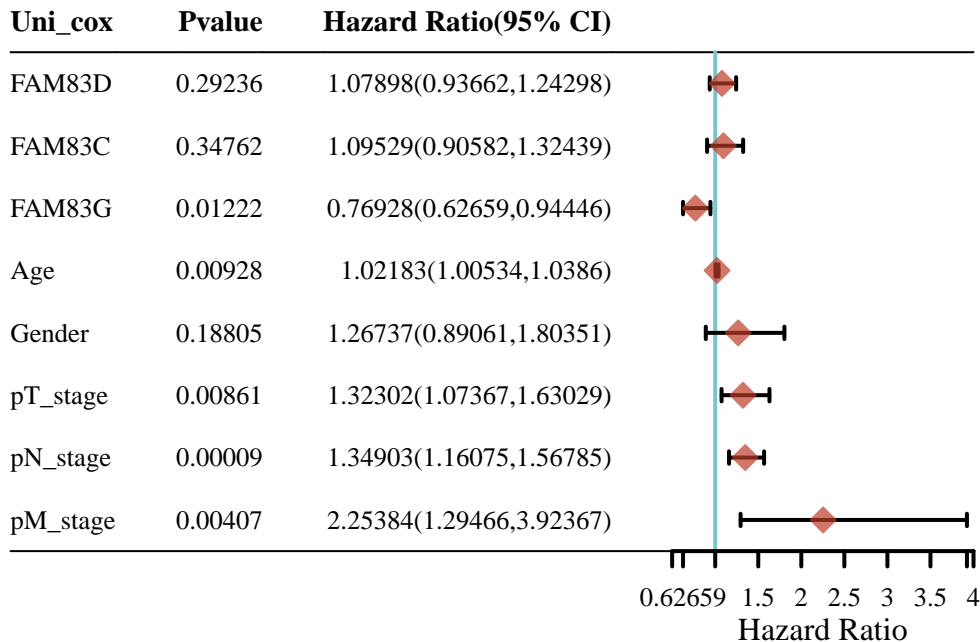

Supplement: Data_Sheet_11.ZIP [file Data_Sheet_11.ZIP]

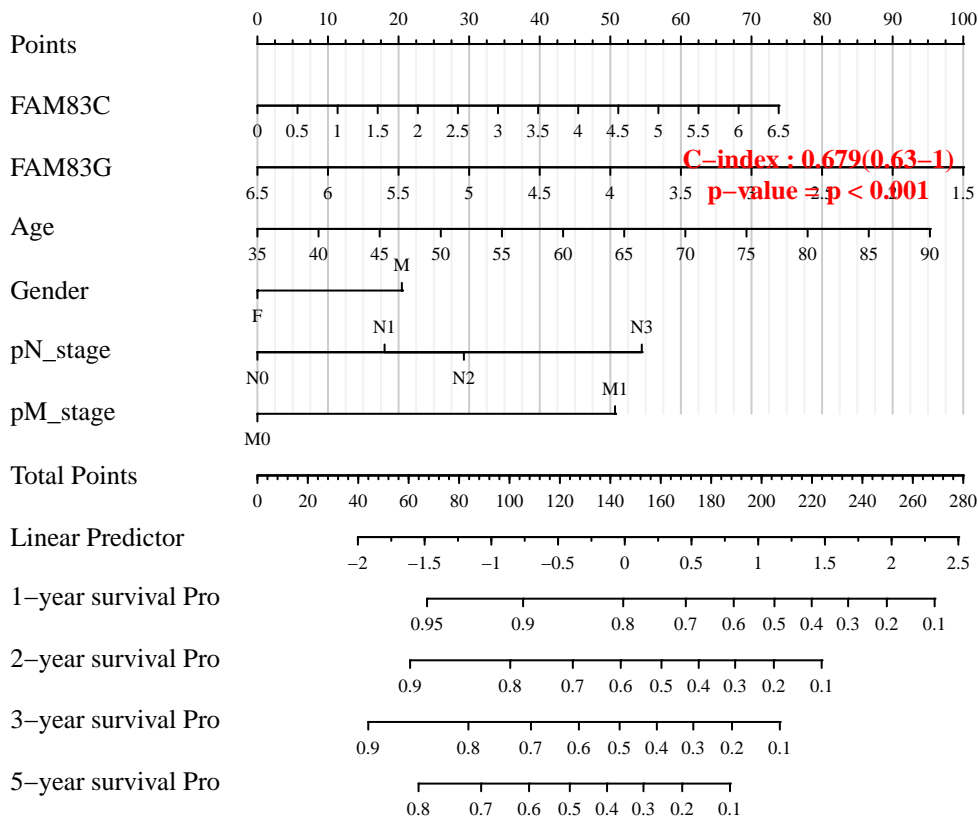

Supplement: Data_Sheet_11.ZIP [file Data_Sheet_11.ZIP]

Coefficients

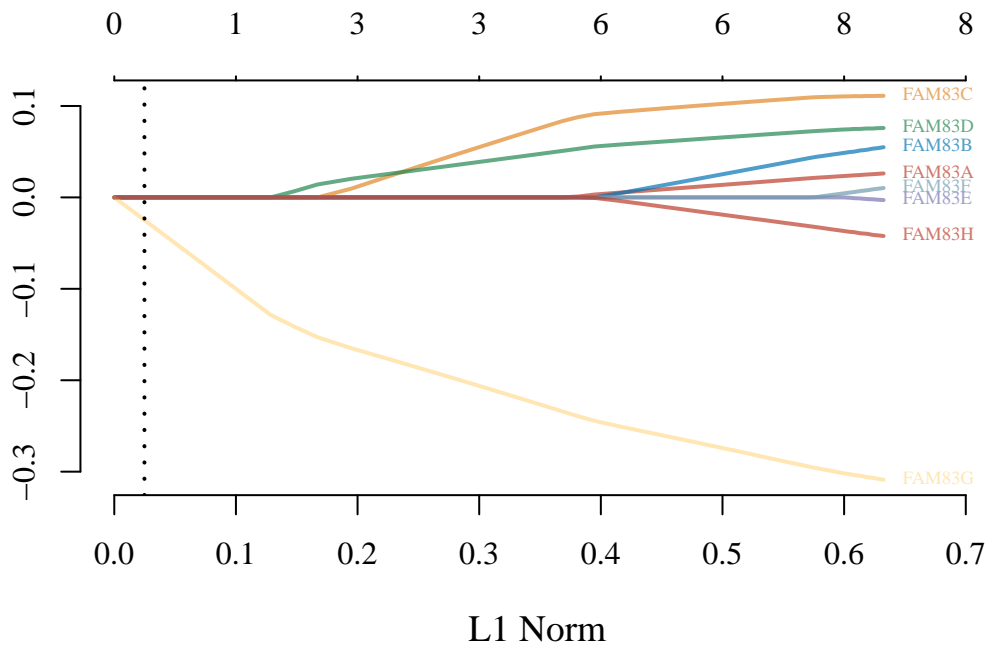

Supplement: Data_Sheet_11.ZIP [file Data_Sheet_11.ZIP]

Partial Likelihood Deviance

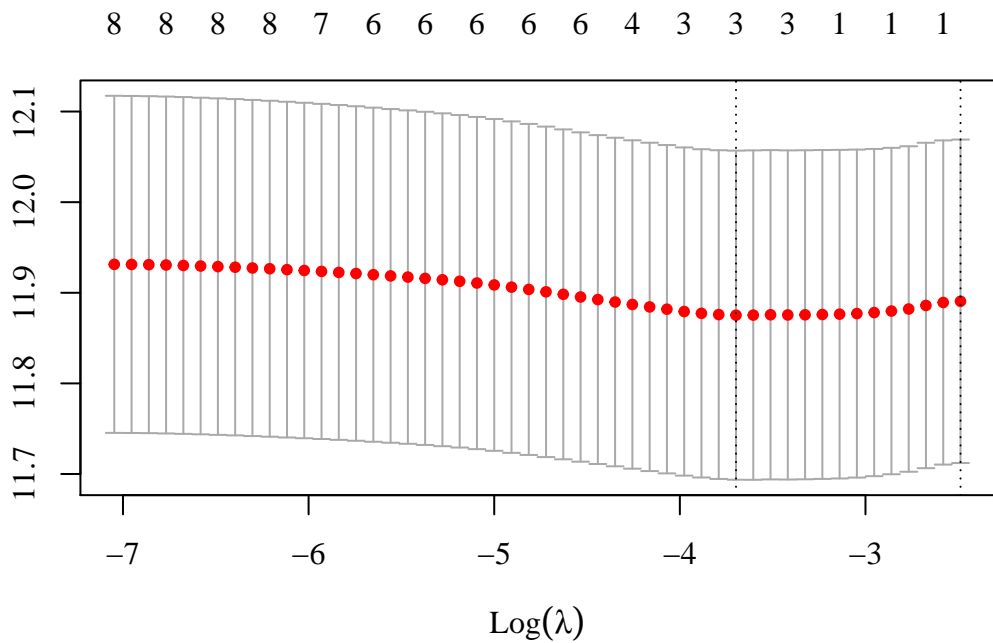

Supplement: Data_Sheet_11.ZIP [file Data_Sheet_11.ZIP]

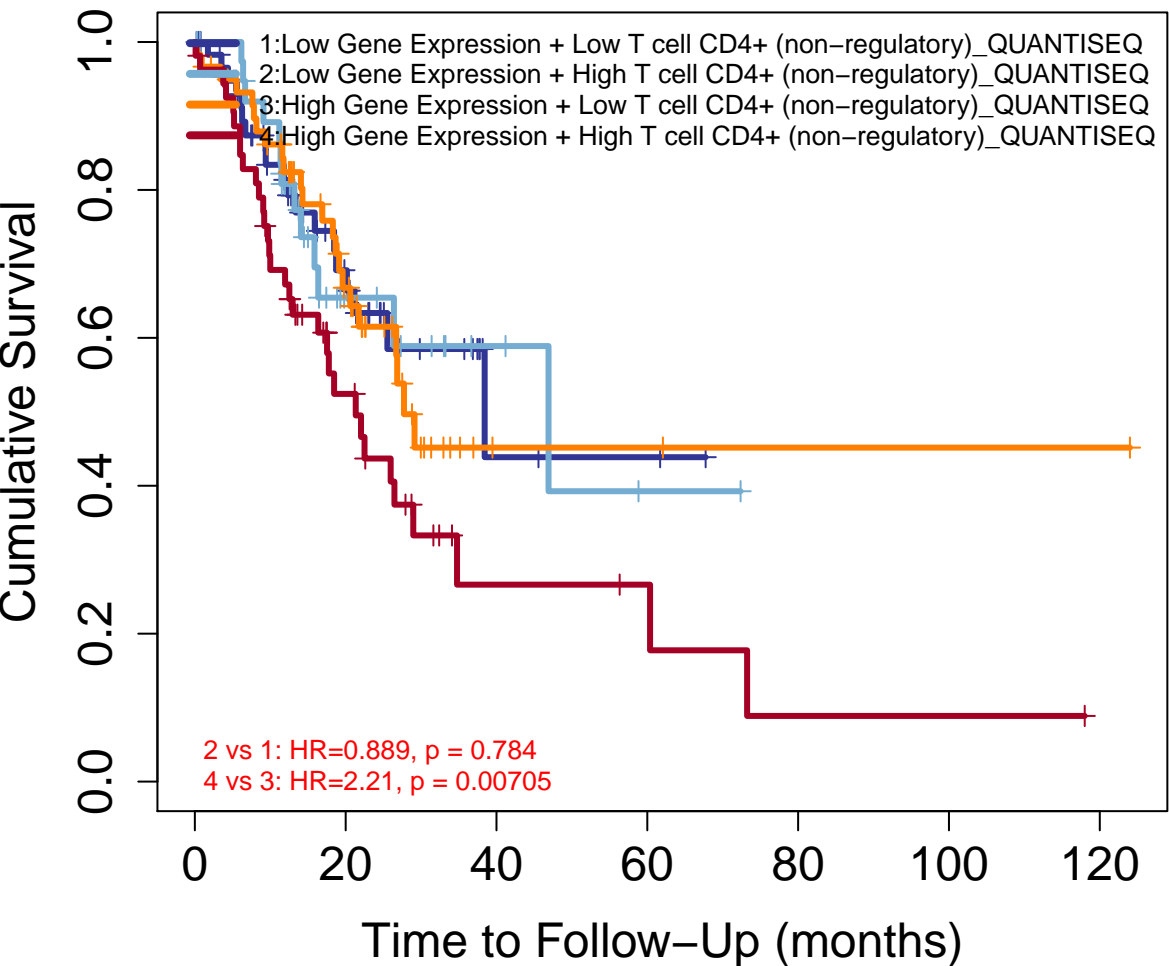

Supplement: Data_Sheet_12.ZIP [file Data_Sheet_12.ZIP]

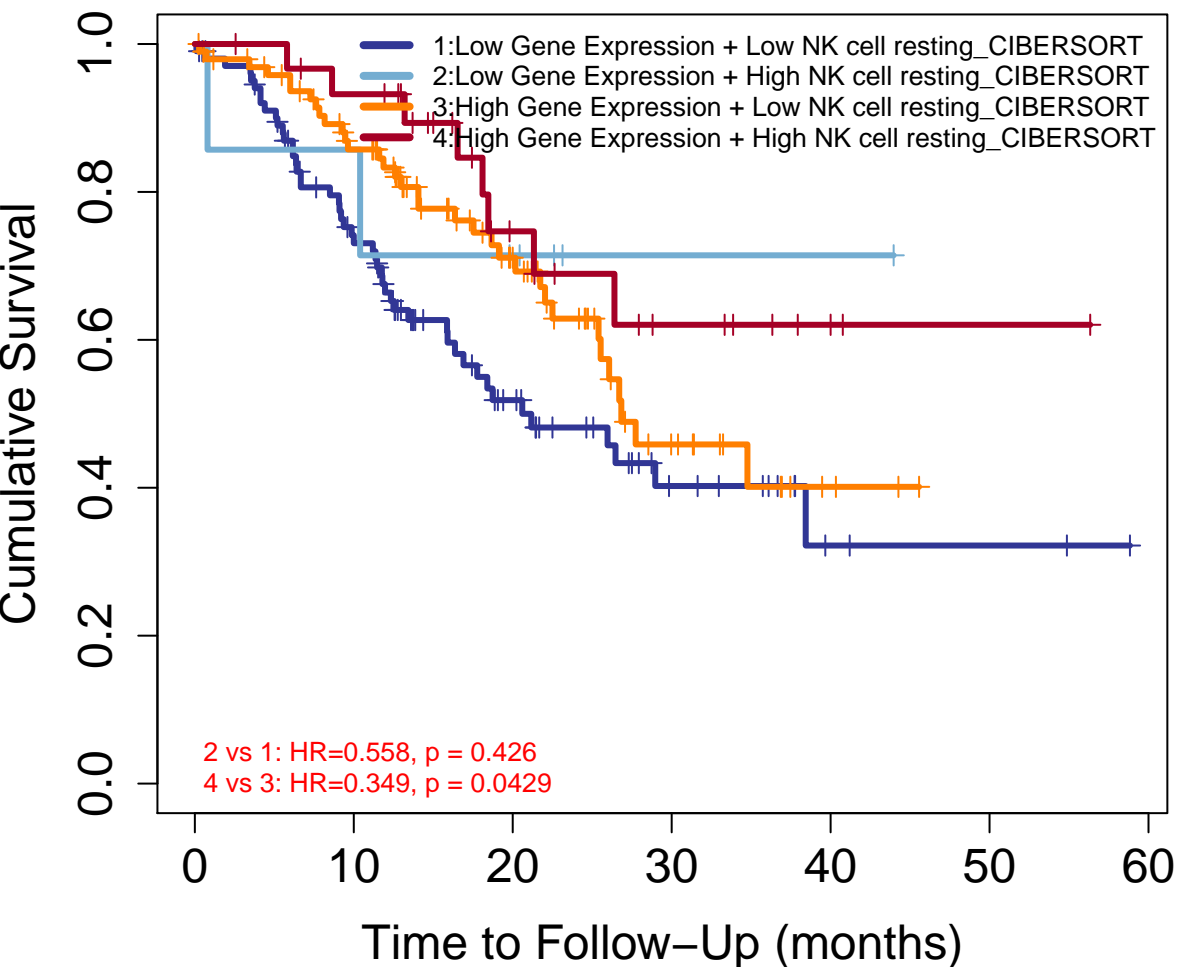

Supplement: Data_Sheet_12.ZIP [file Data_Sheet_12.ZIP]

FAM83G Expression Level (log2 TPM)

STAD

Purity

Rho = 0.093  
p = 7.10e-02

0.25

0.50

0.75

1.00

Purity

B cell\_TIMER

Rho = 0.01  
p = 8.45e-01

0

1

2

3

4

Infiltration Level

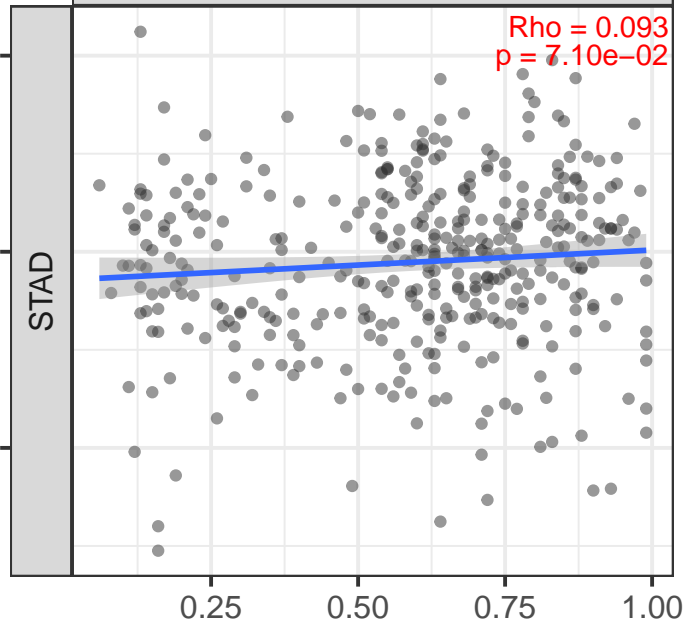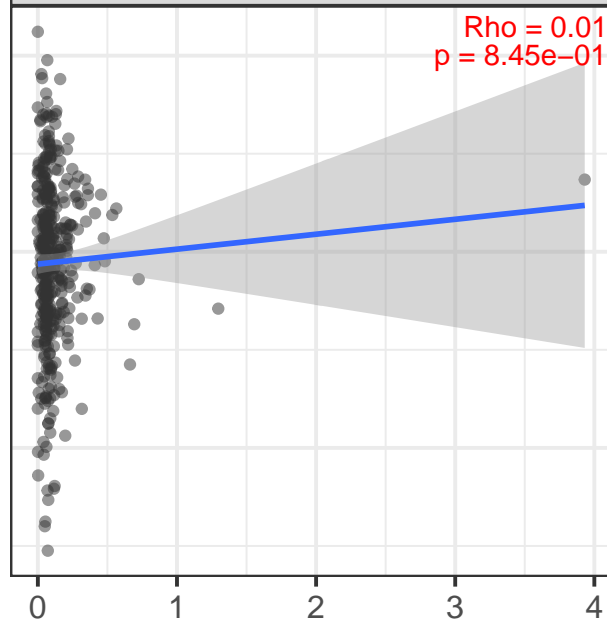

Supplement: Data_Sheet_12.ZIP [file Data_Sheet_12.ZIP]

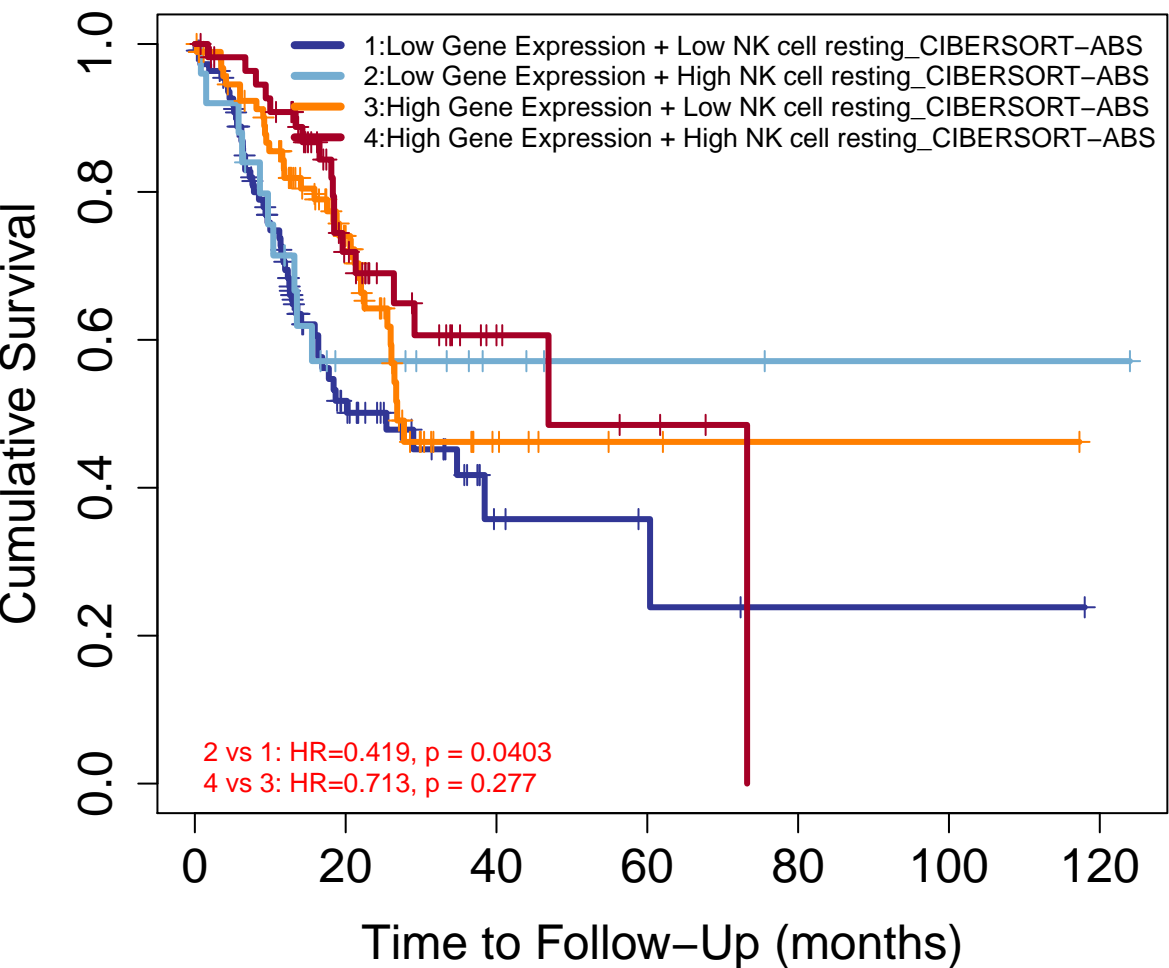

Supplement: Data_Sheet_12.ZIP [file Data_Sheet_12.ZIP]

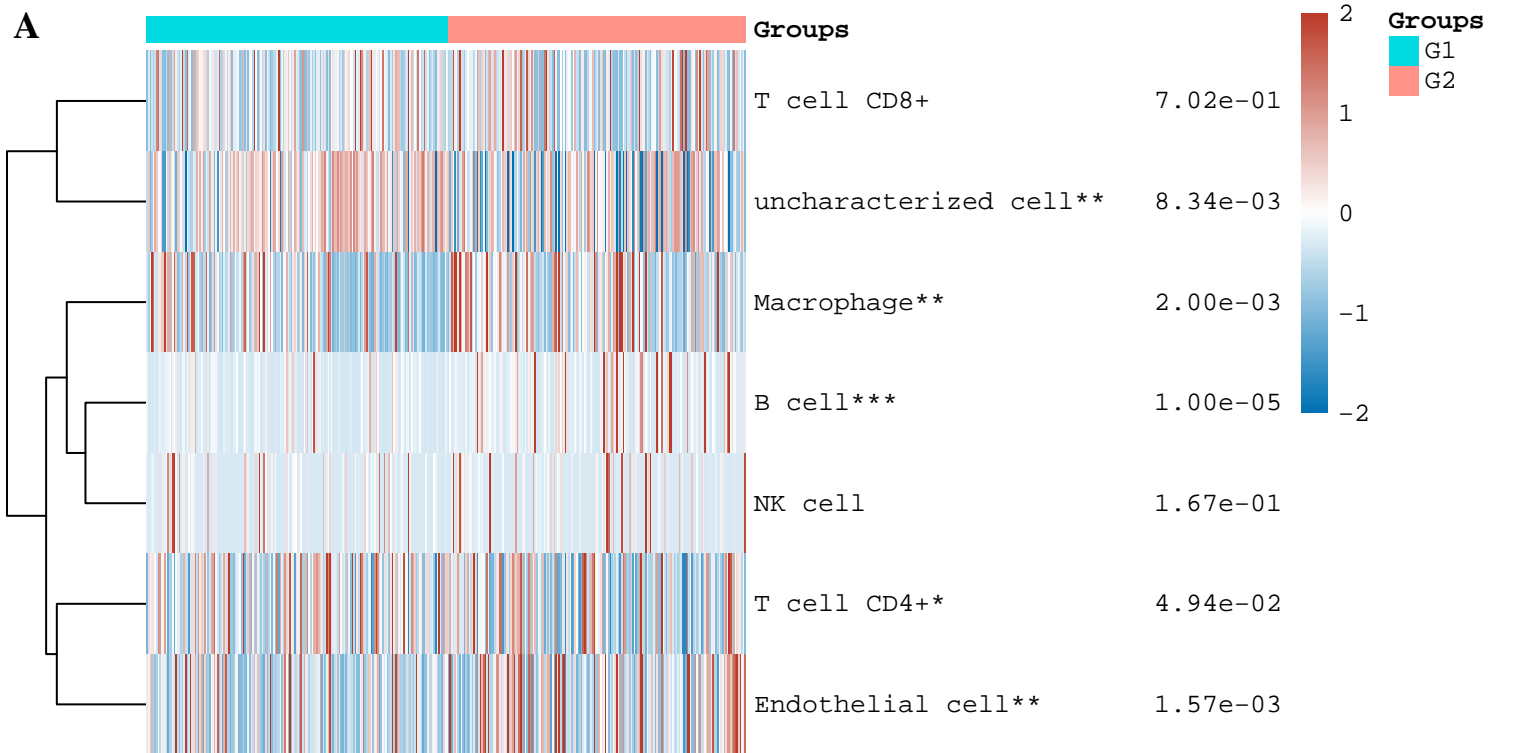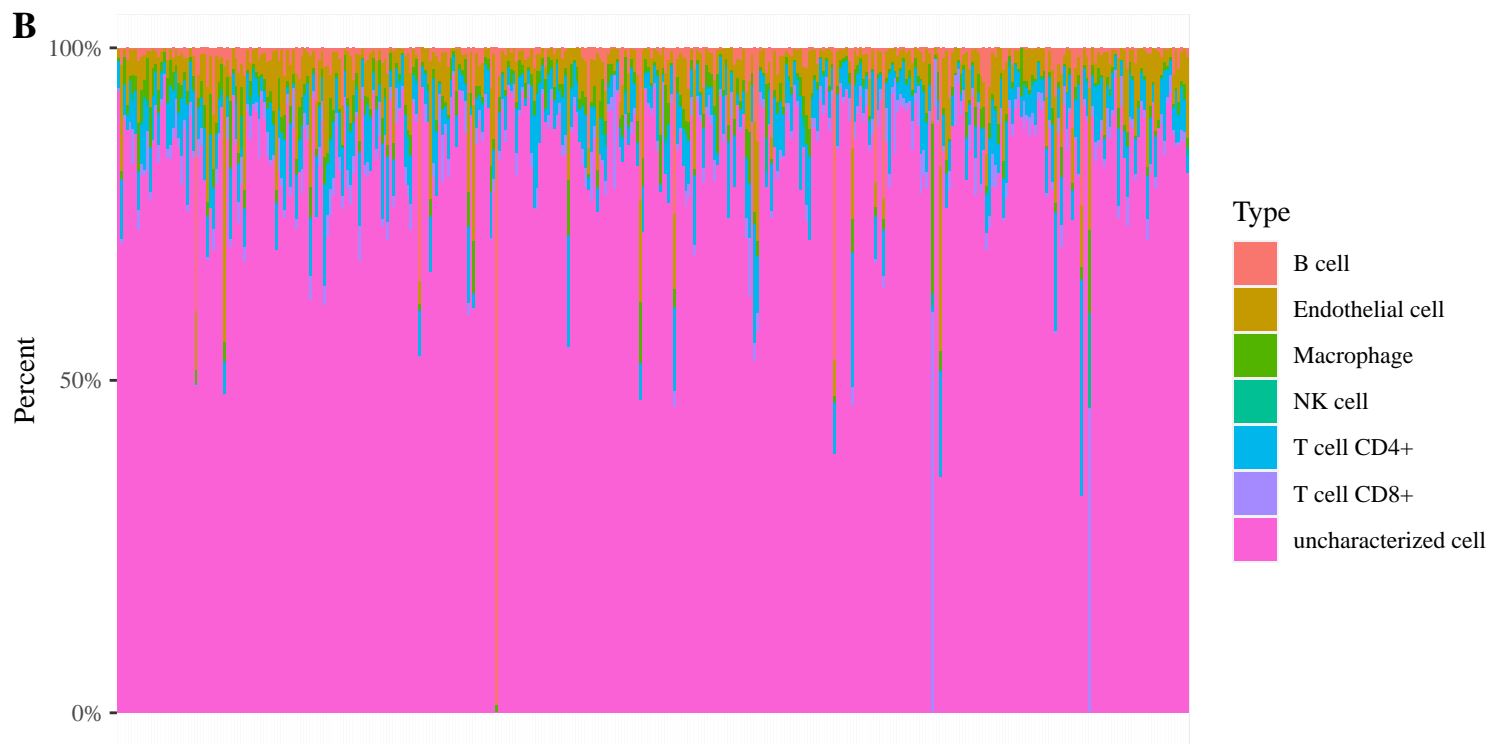

Supplement: Data_Sheet_12.ZIP [file Data_Sheet_12.ZIP]

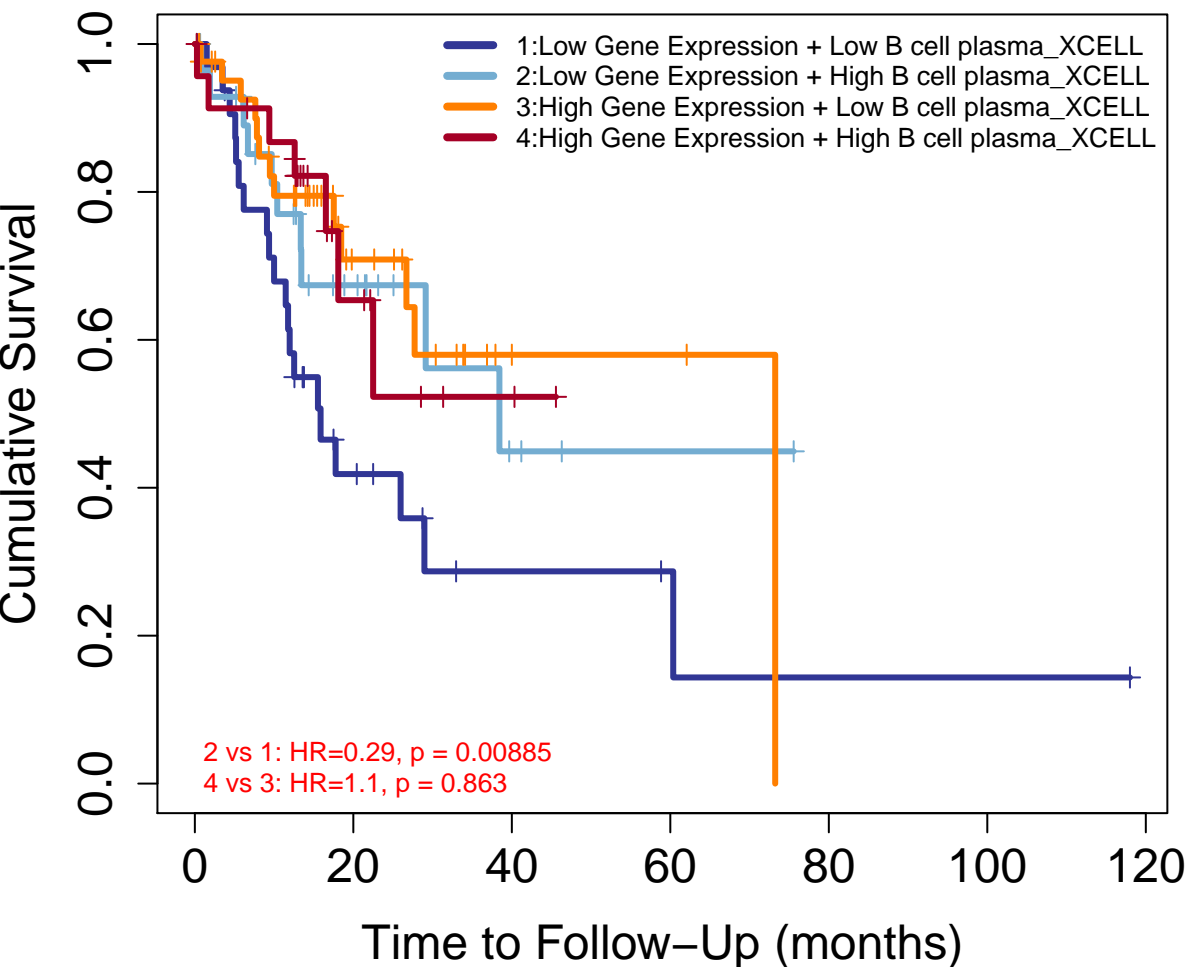

Supplement: Data_Sheet_12.ZIP [file Data_Sheet_12.ZIP]

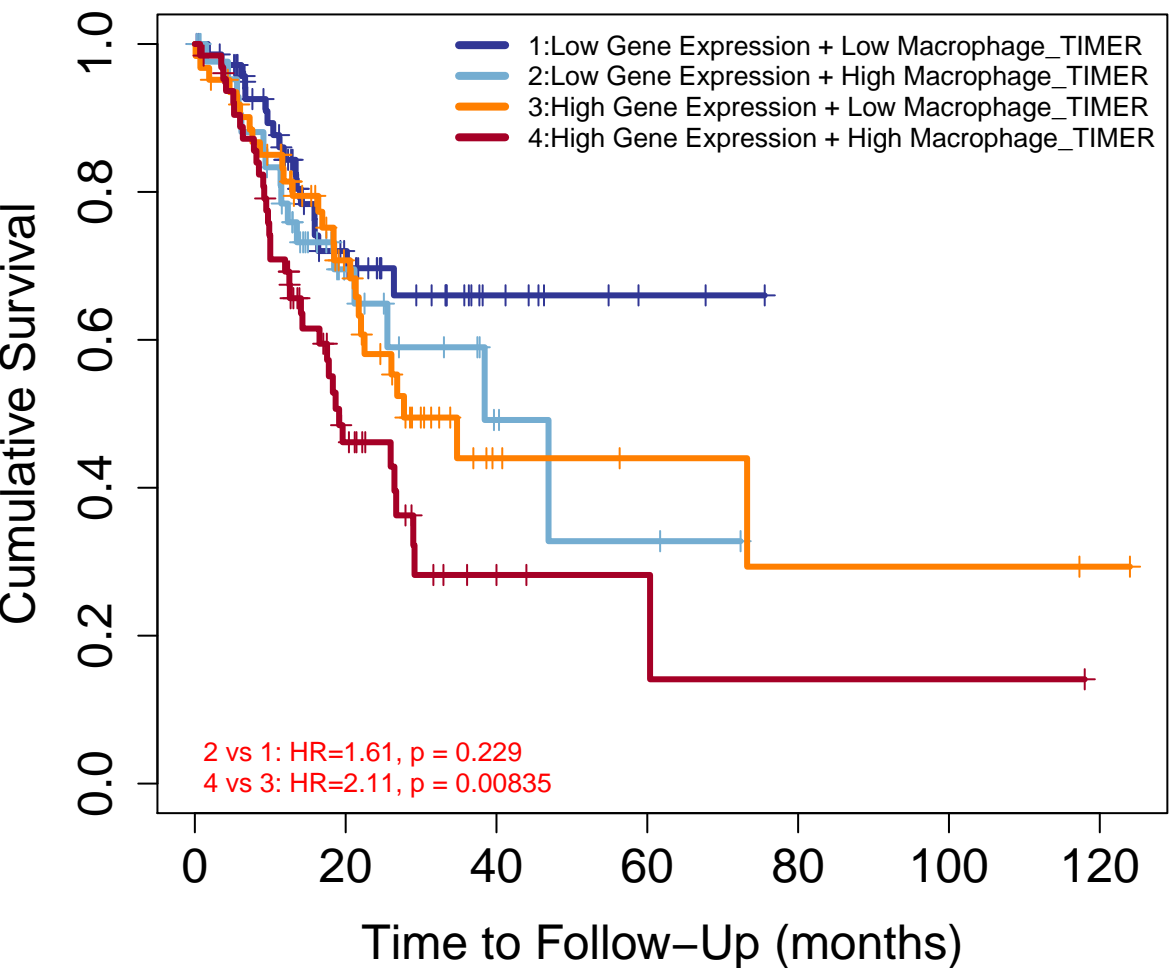

Supplement: Data_Sheet_12.ZIP [file Data_Sheet_12.ZIP]

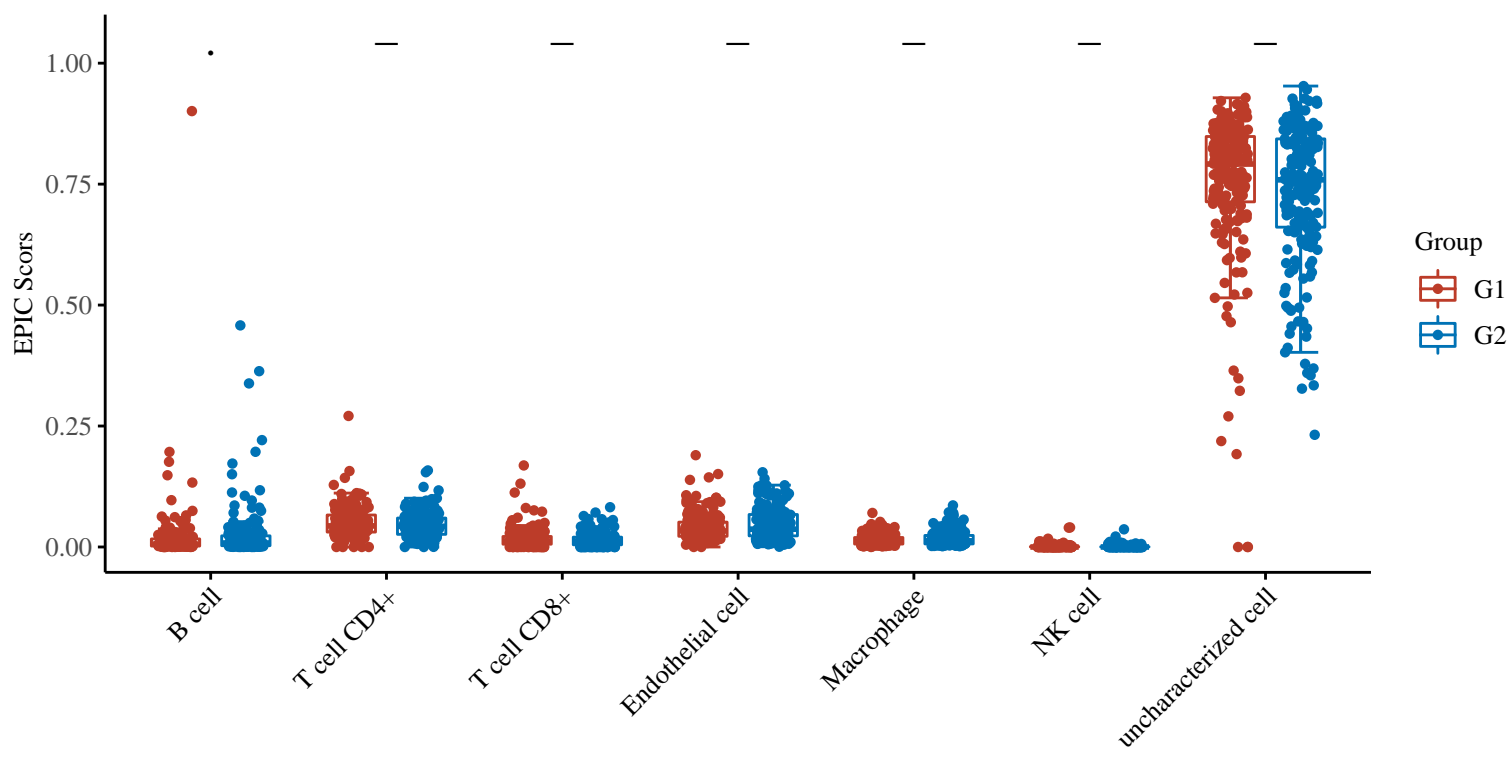

Supplement: Data_Sheet_12.ZIP [file Data_Sheet_12.ZIP]

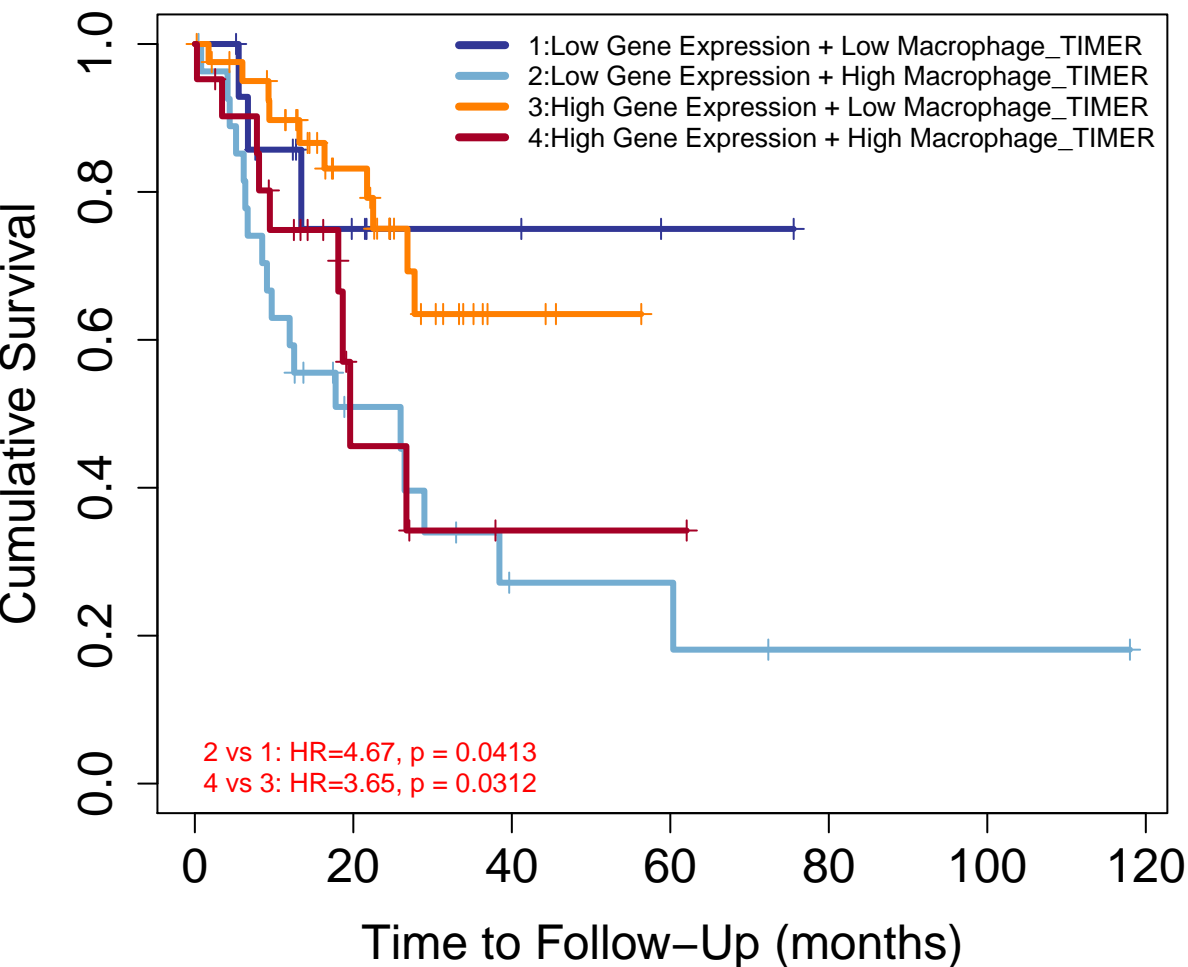

Supplement: Data_Sheet_12.ZIP [file Data_Sheet_12.ZIP]

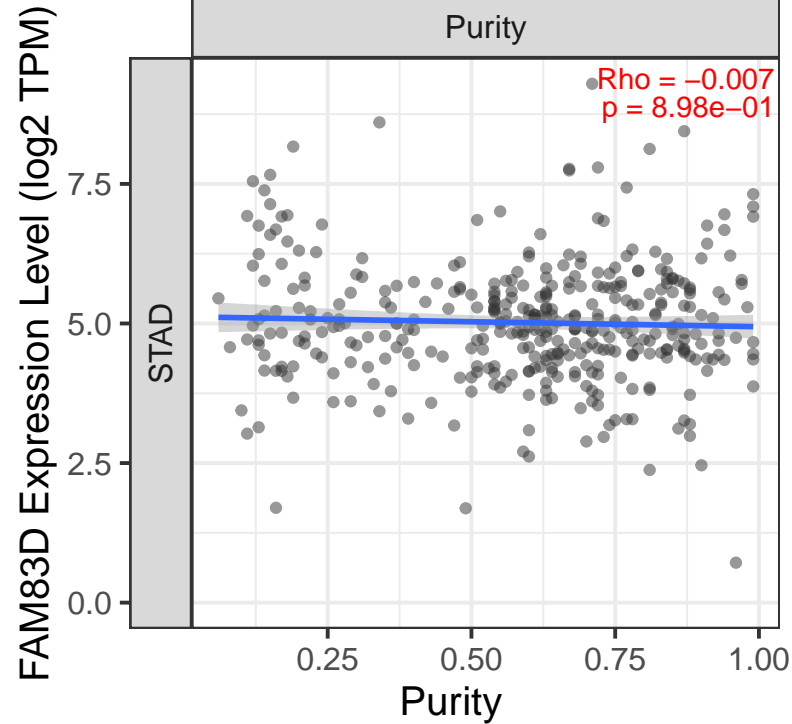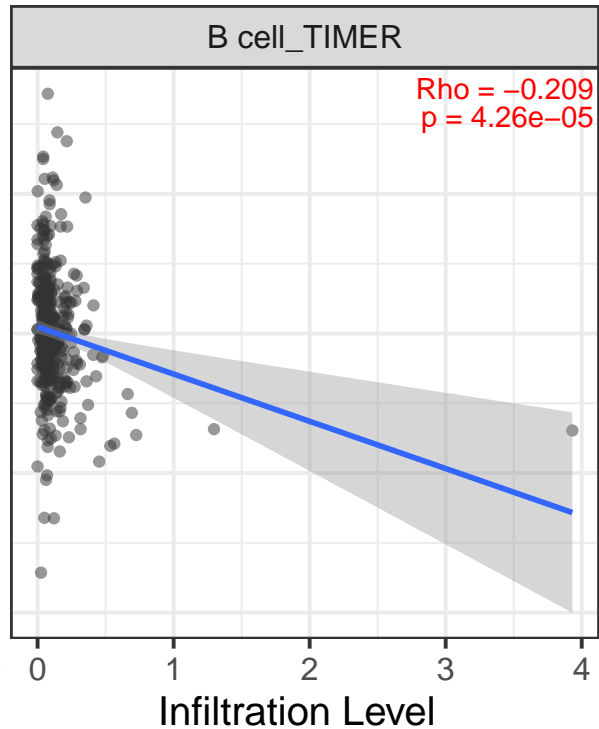

Supplement: Data_Sheet_12.ZIP [file Data_Sheet_12.ZIP]

FAM83D Expression Level (log2 TPM)

STAD

Purity

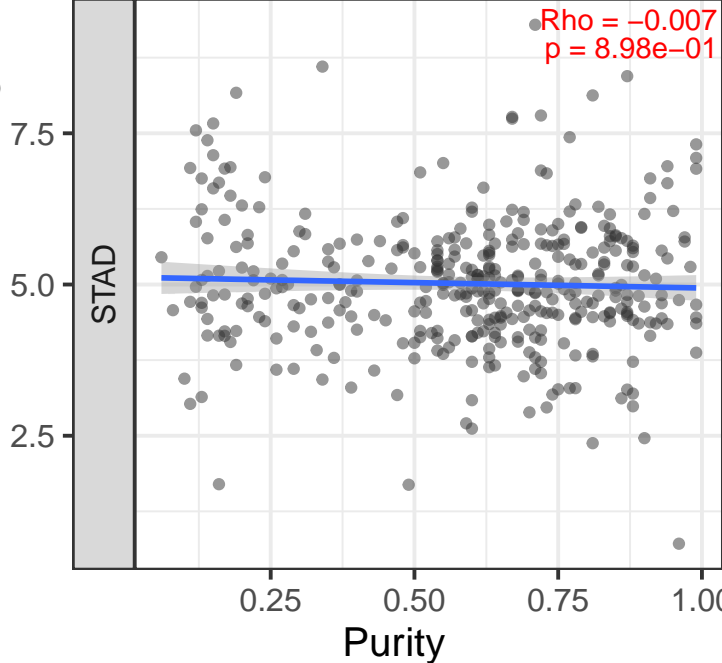

Myeloid dendritic cell\_TIMER

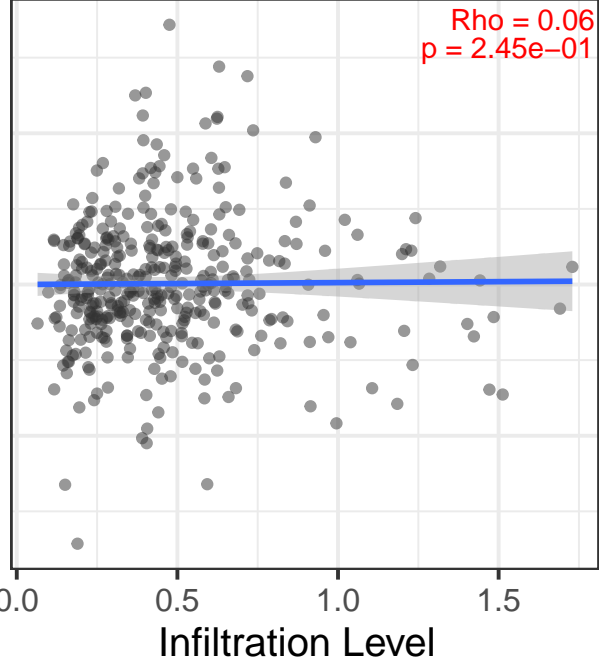

Supplement: Data_Sheet_12.ZIP [file Data_Sheet_12.ZIP]

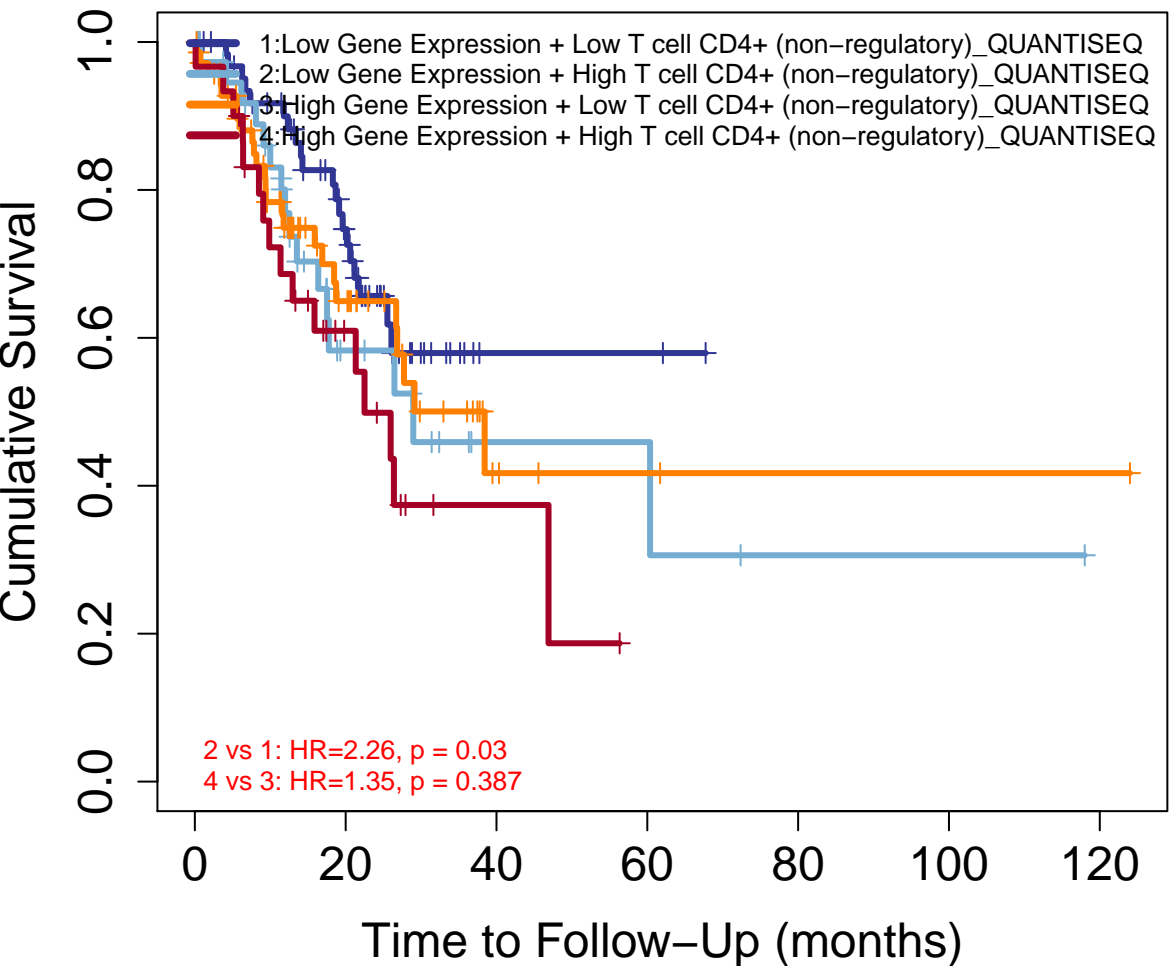

Supplement: Data_Sheet_12.ZIP [file Data_Sheet_12.ZIP]

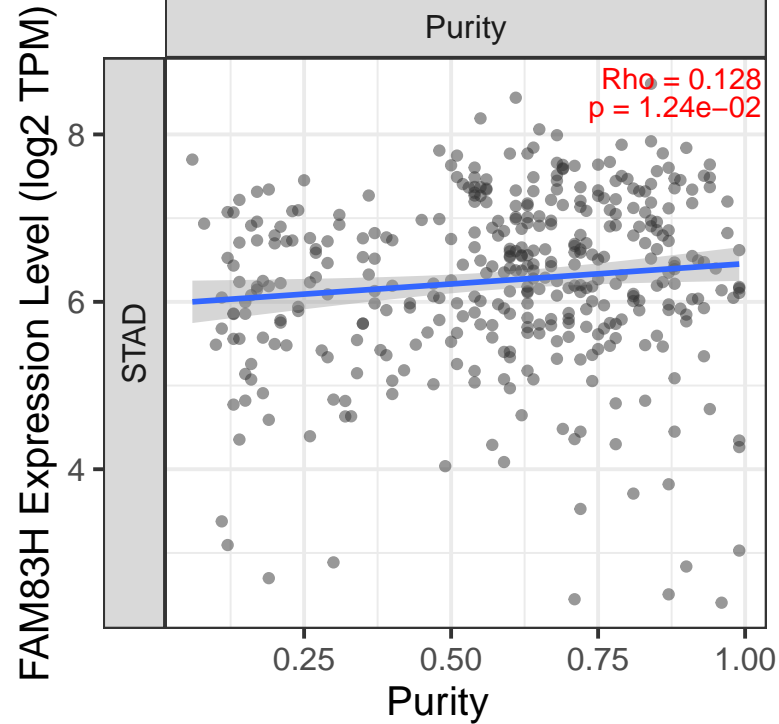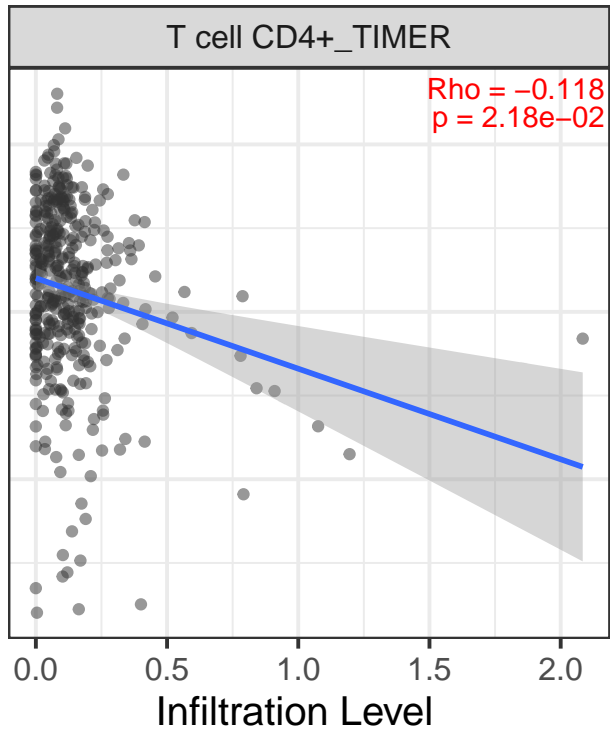

Supplement: Data_Sheet_12.ZIP [file Data_Sheet_12.ZIP]

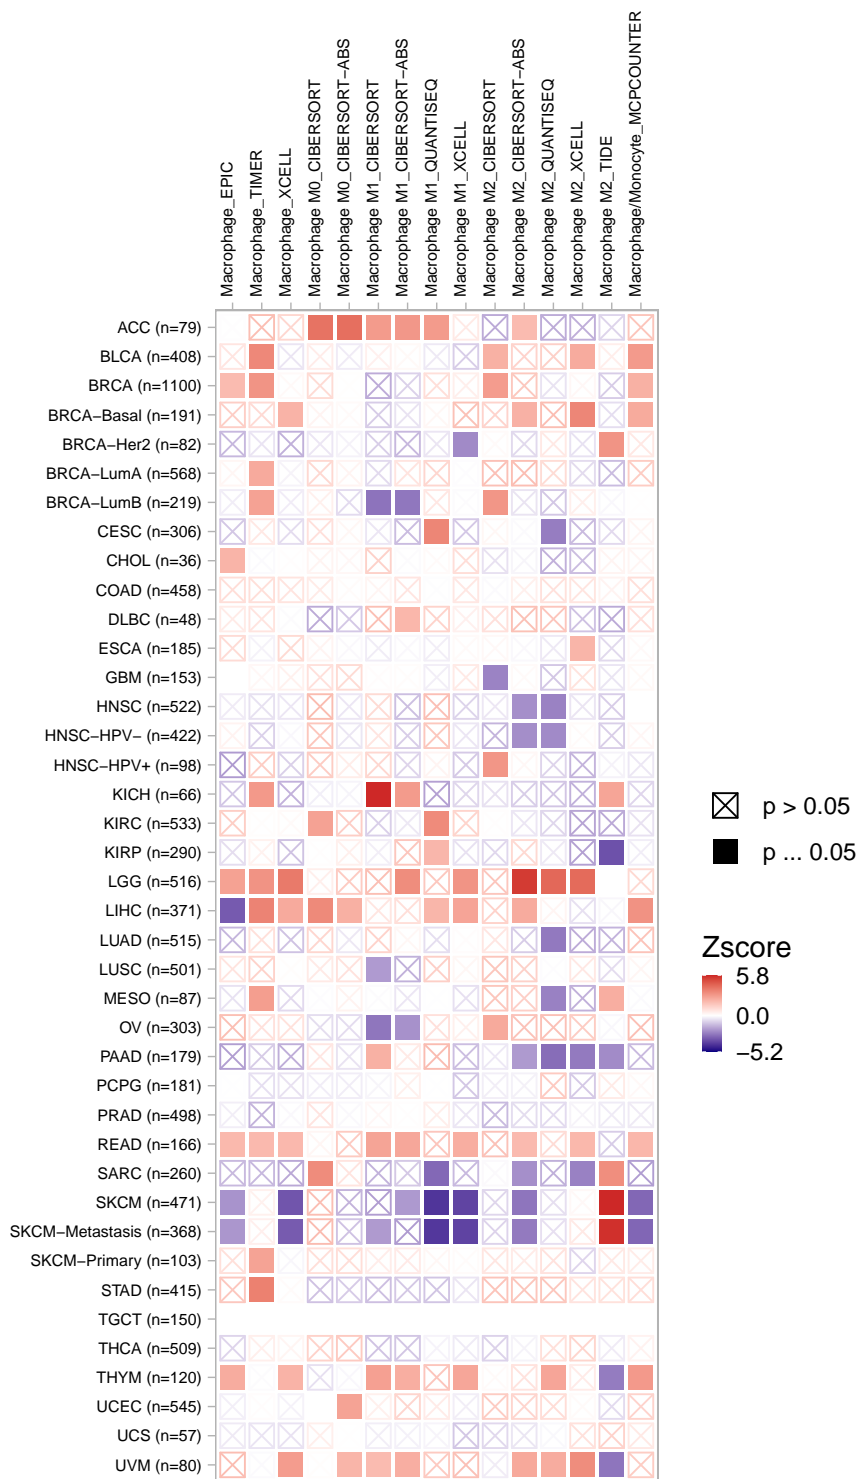

Supplement: Data_Sheet_12.ZIP [file Data_Sheet_12.ZIP]

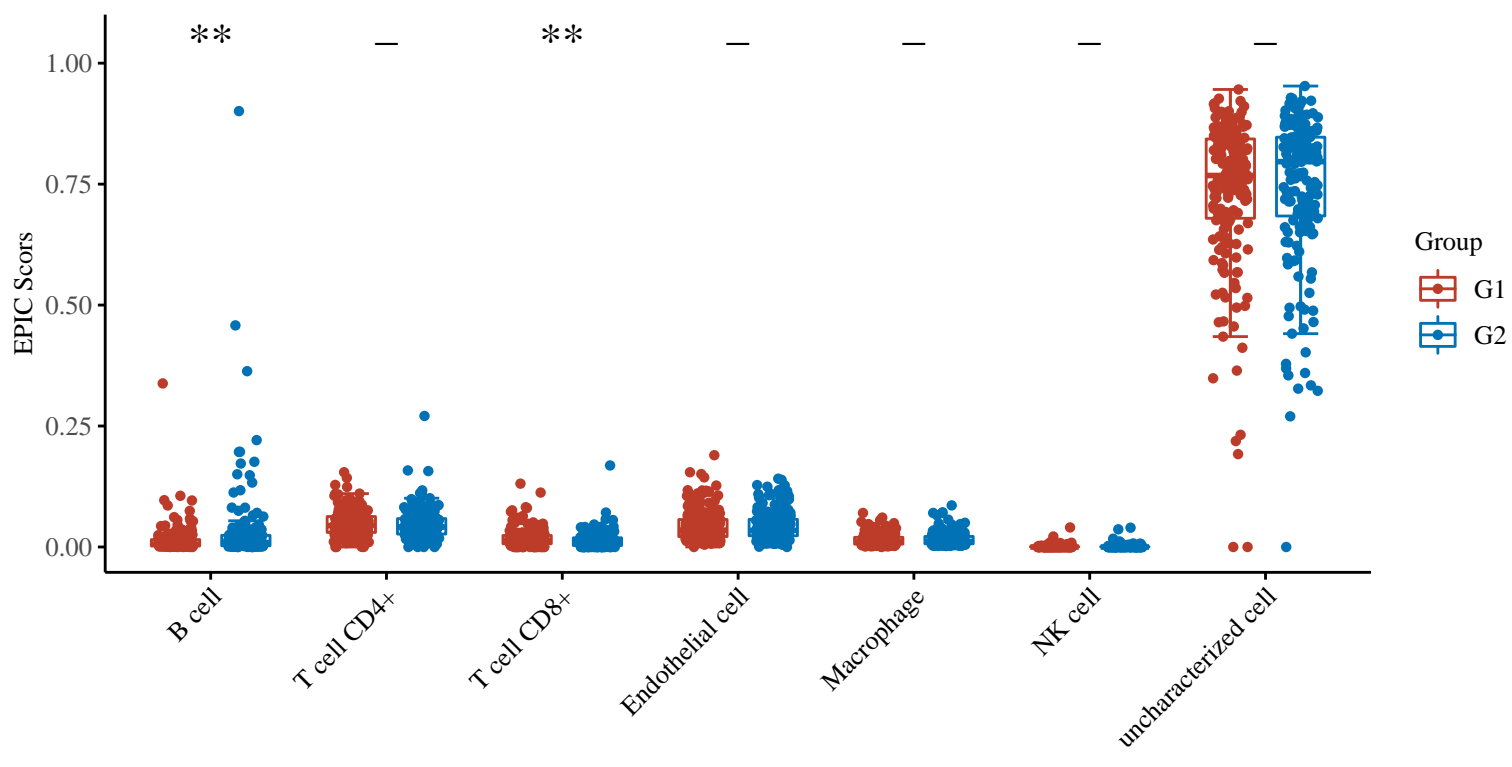

Supplement: Data_Sheet_12.ZIP [file Data_Sheet_12.ZIP]

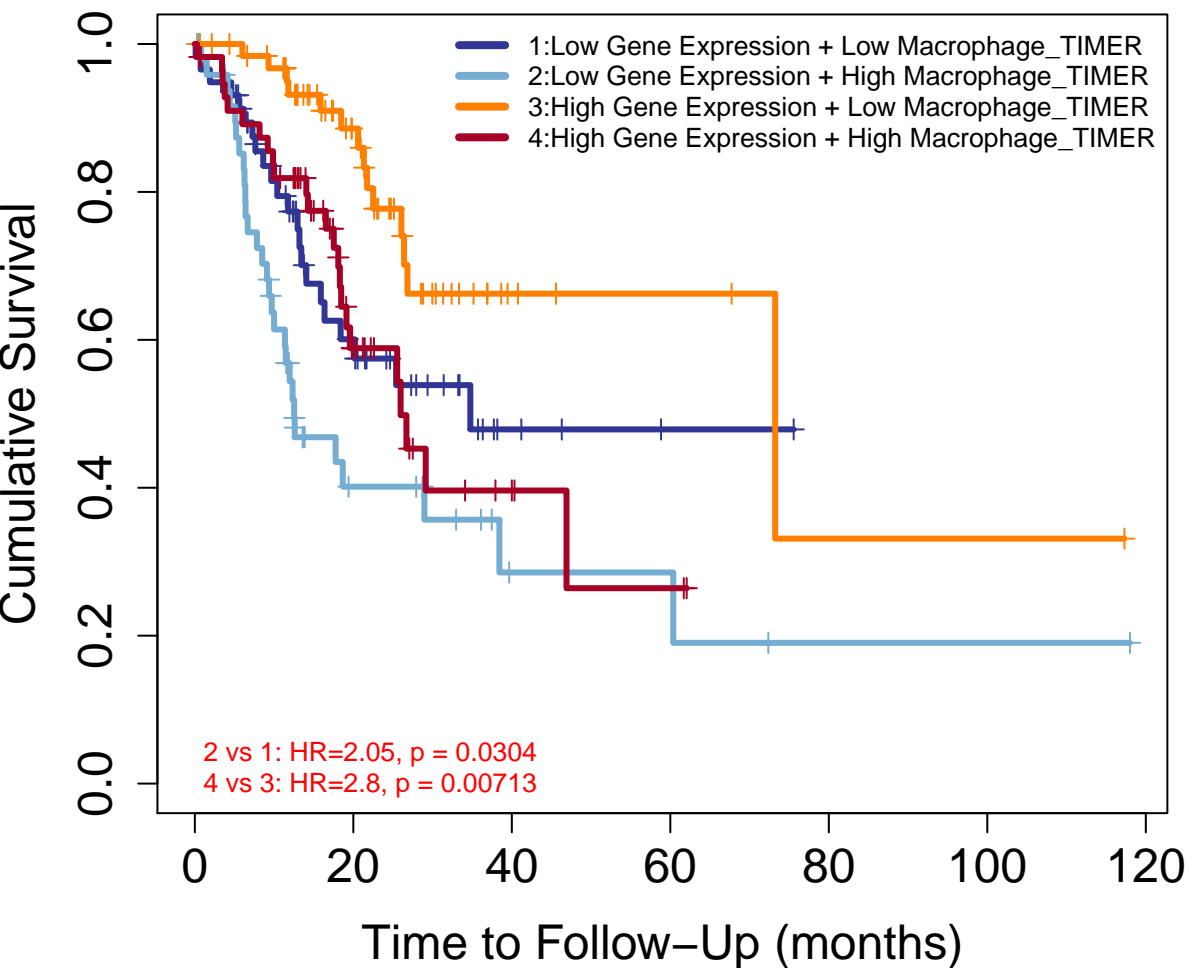

Supplement: Data_Sheet_12.ZIP [file Data_Sheet_12.ZIP]

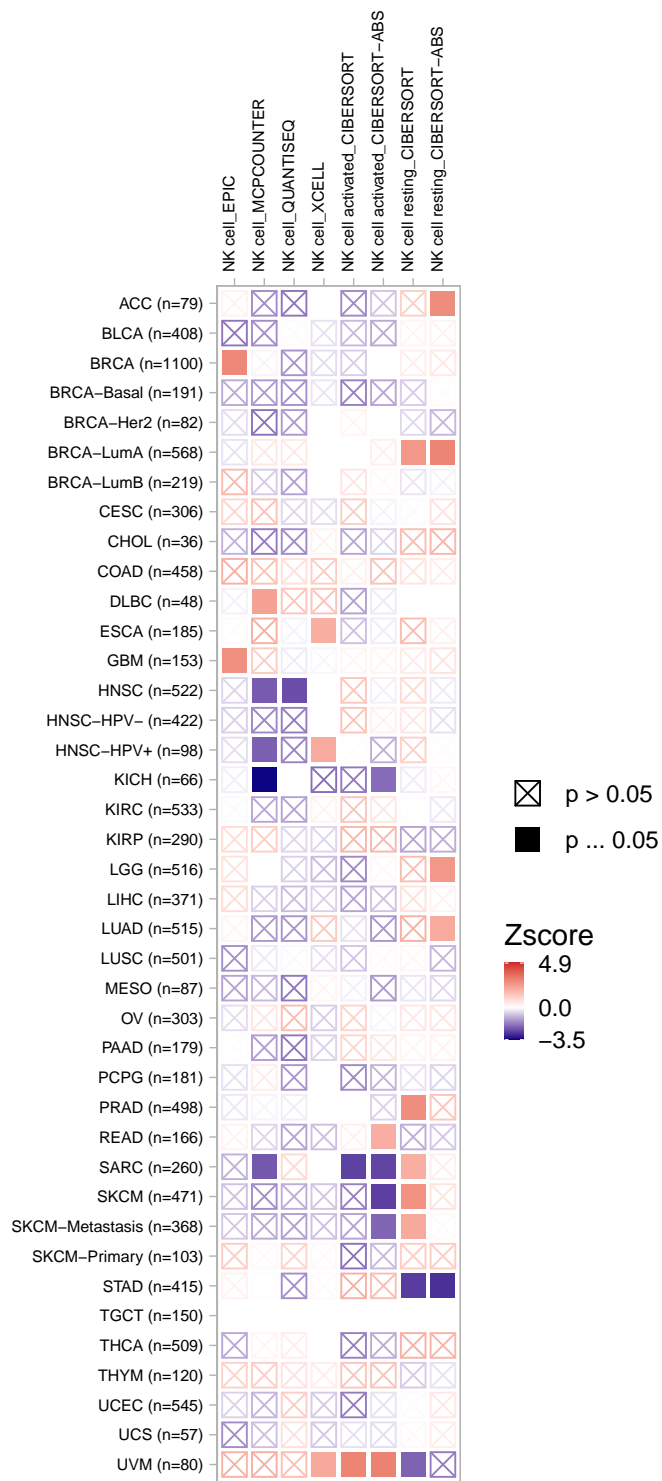

Supplement: Data_Sheet_12.ZIP [file Data_Sheet_12.ZIP]

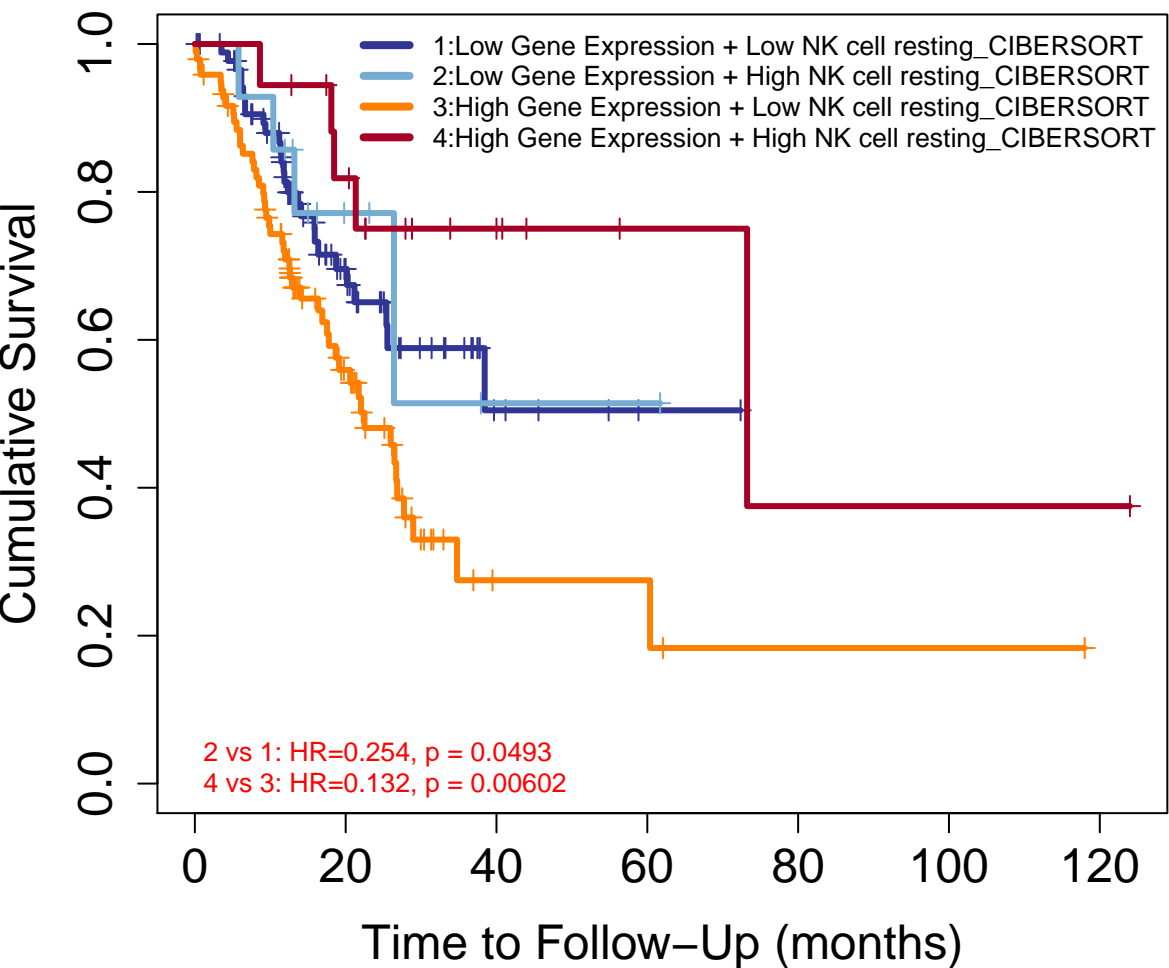

Supplement: Data_Sheet_12.ZIP [file Data_Sheet_12.ZIP]

FAM83D Expression Level (log2 TPM)

STAD

Purity



T cell CD8+\_TIMER

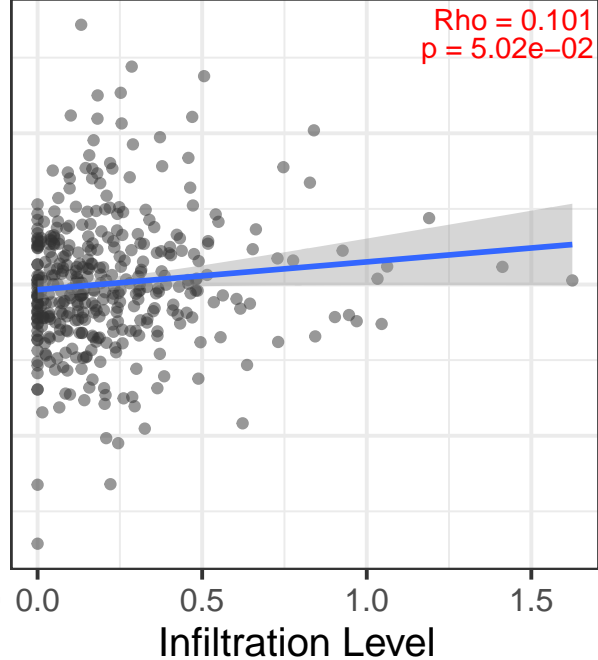

Supplement: Data_Sheet_12.ZIP [file Data_Sheet_12.ZIP]

FAM83H Expression Level (log2 TPM)

STAD

Purity

$Rho = 0.128$   
 $p = 1.24e-02$

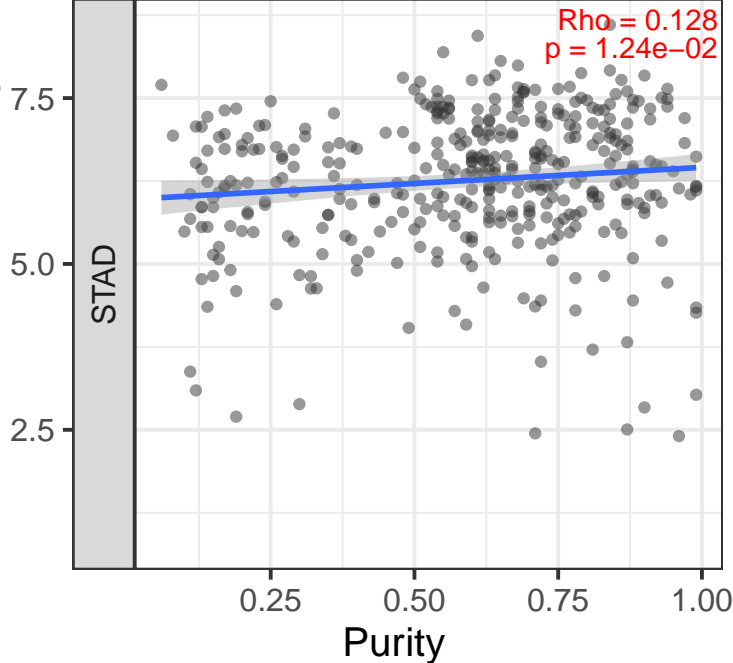

B cell\_TIMER

$Rho = -0.076$   
 $p = 1.42e-01$

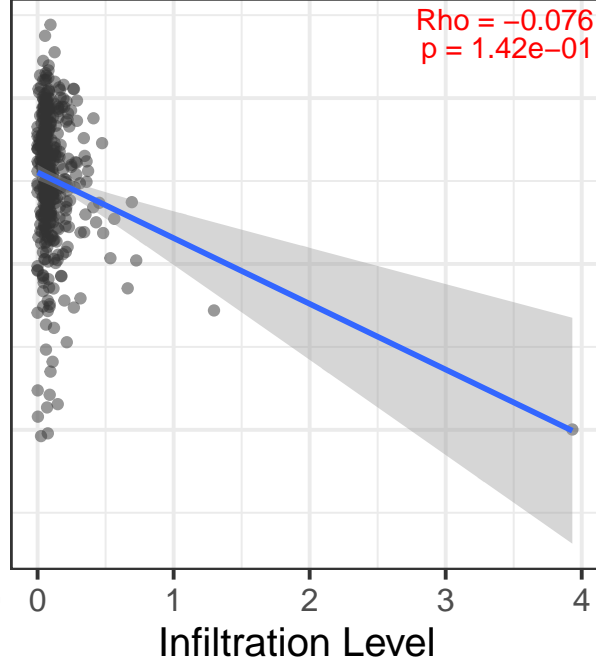

Supplement: Data_Sheet_12.ZIP [file Data_Sheet_12.ZIP]

FAM83D Expression Level (log2 TPM)

STAD

Purity

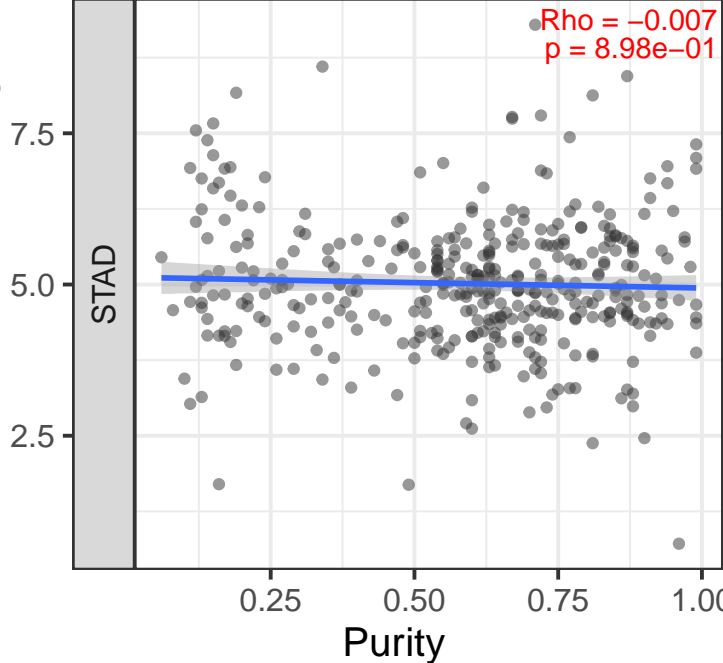

T cell CD4+\_TIMER

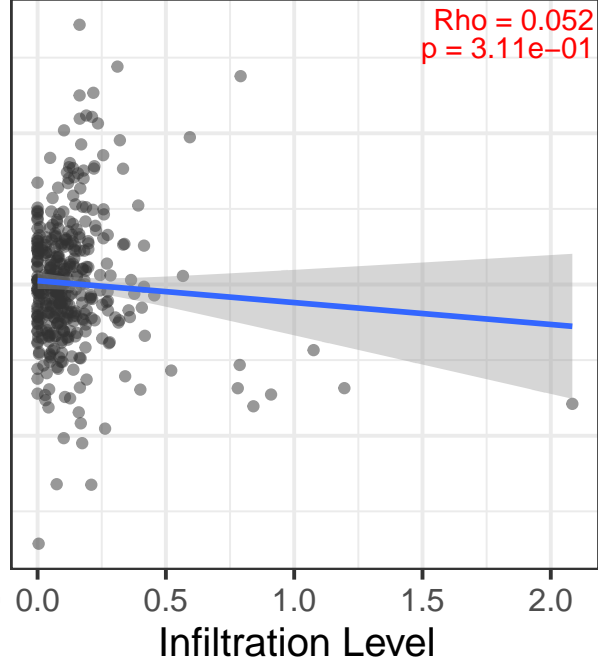

Supplement: Data_Sheet_12.ZIP [file Data_Sheet_12.ZIP]

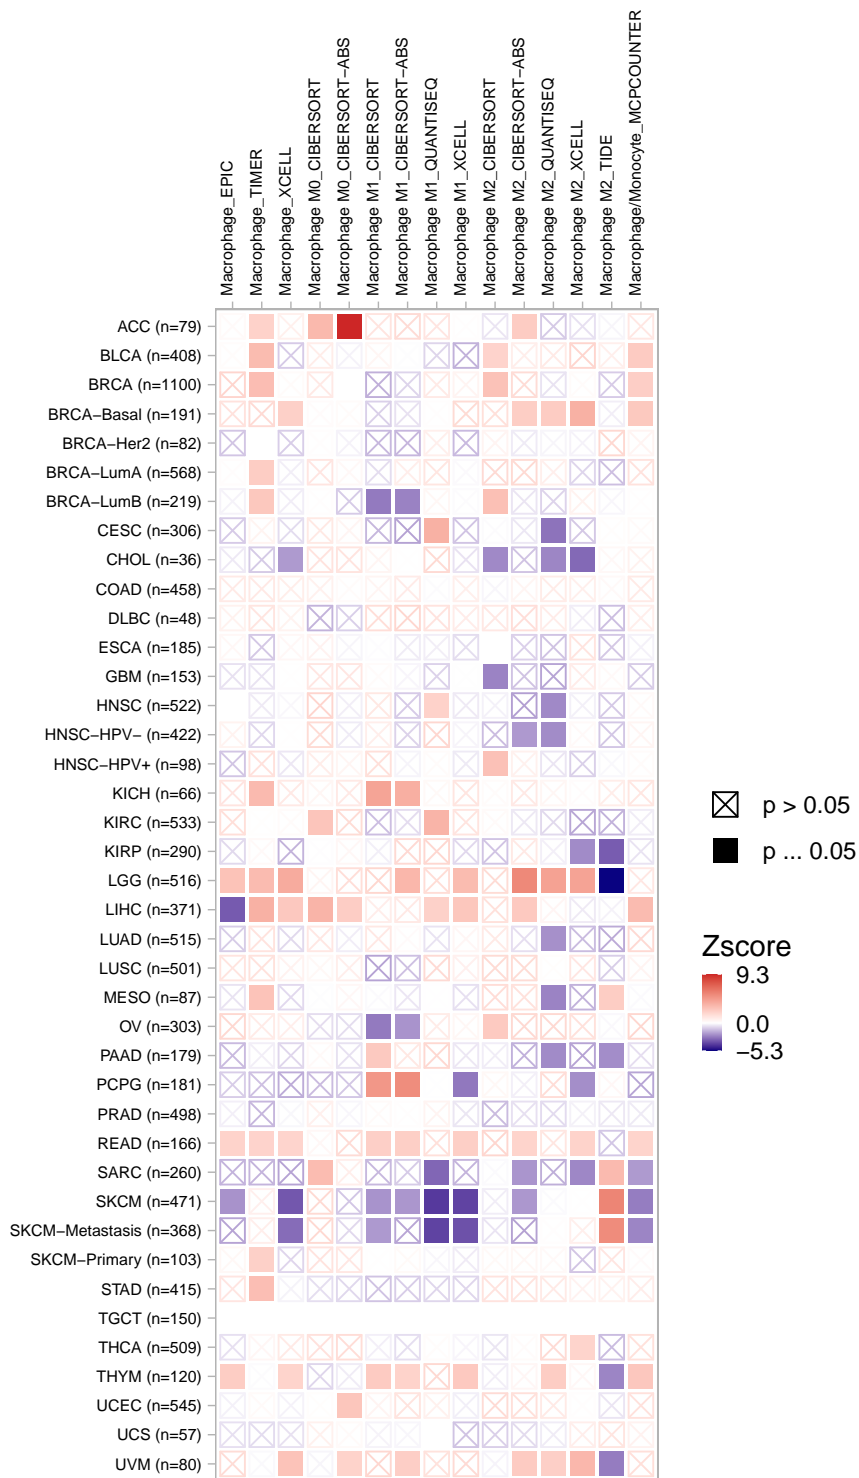

Supplement: Data_Sheet_12.ZIP [file Data_Sheet_12.ZIP]

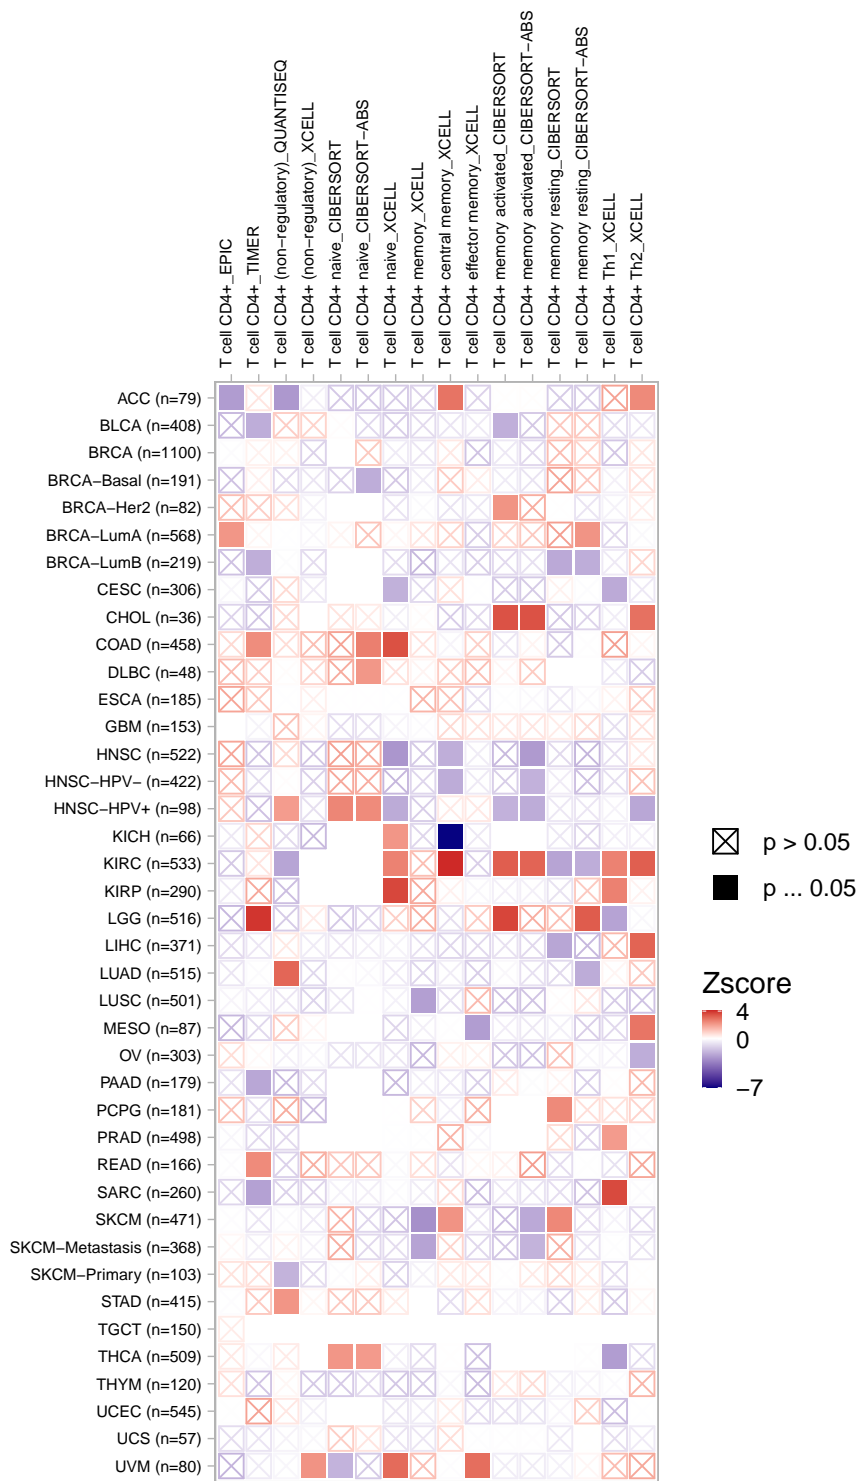

Supplement: Data_Sheet_12.ZIP [file Data_Sheet_12.ZIP]

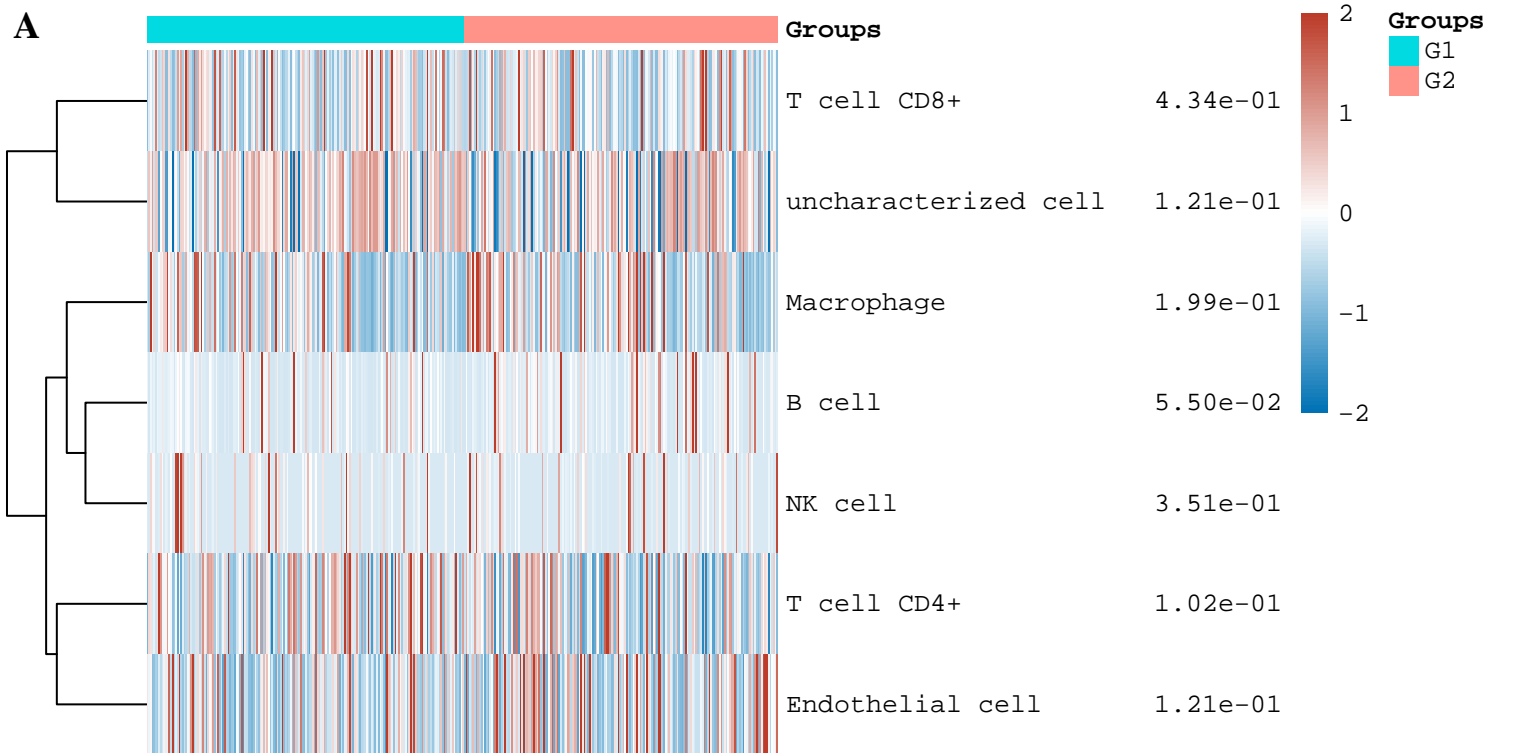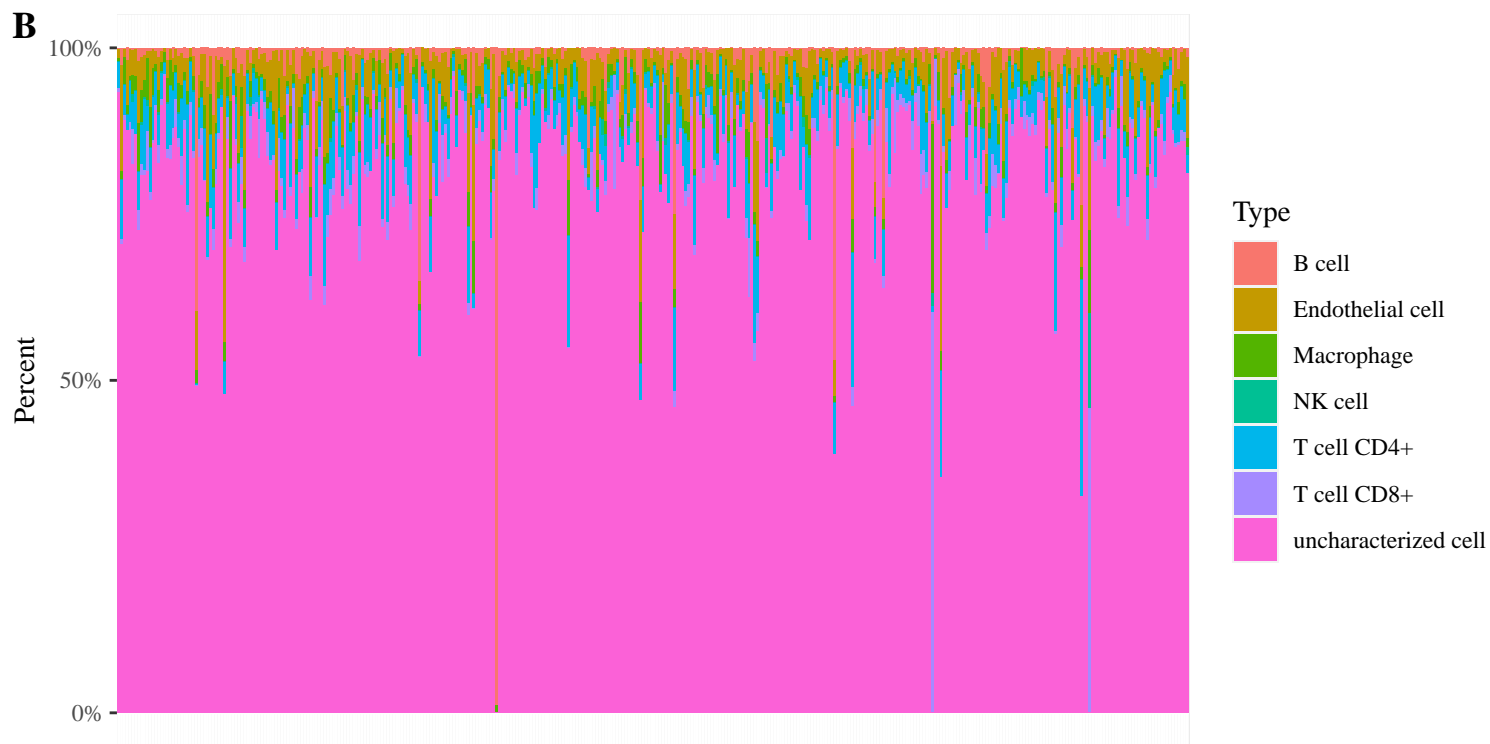

Supplement: Data_Sheet_12.ZIP [file Data_Sheet_12.ZIP]

FAM83D Expression Level (log2 TPM)

STAD

Purity



Macrophage\_TIMER

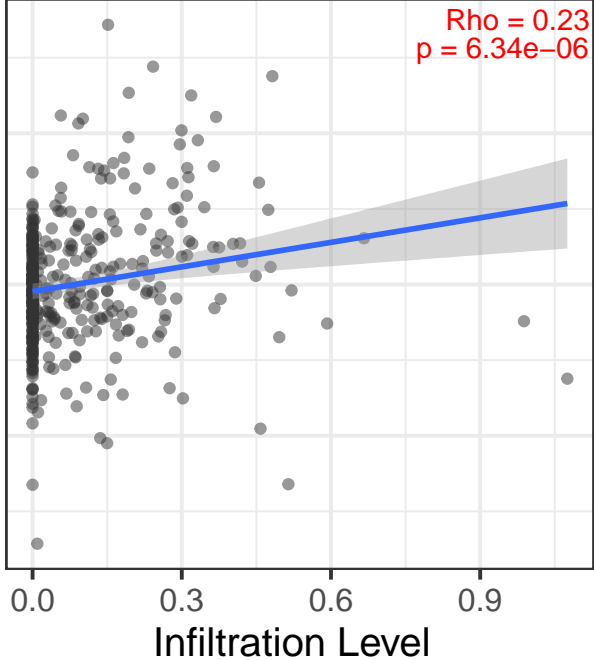

Supplement: Data_Sheet_12.ZIP [file Data_Sheet_12.ZIP]

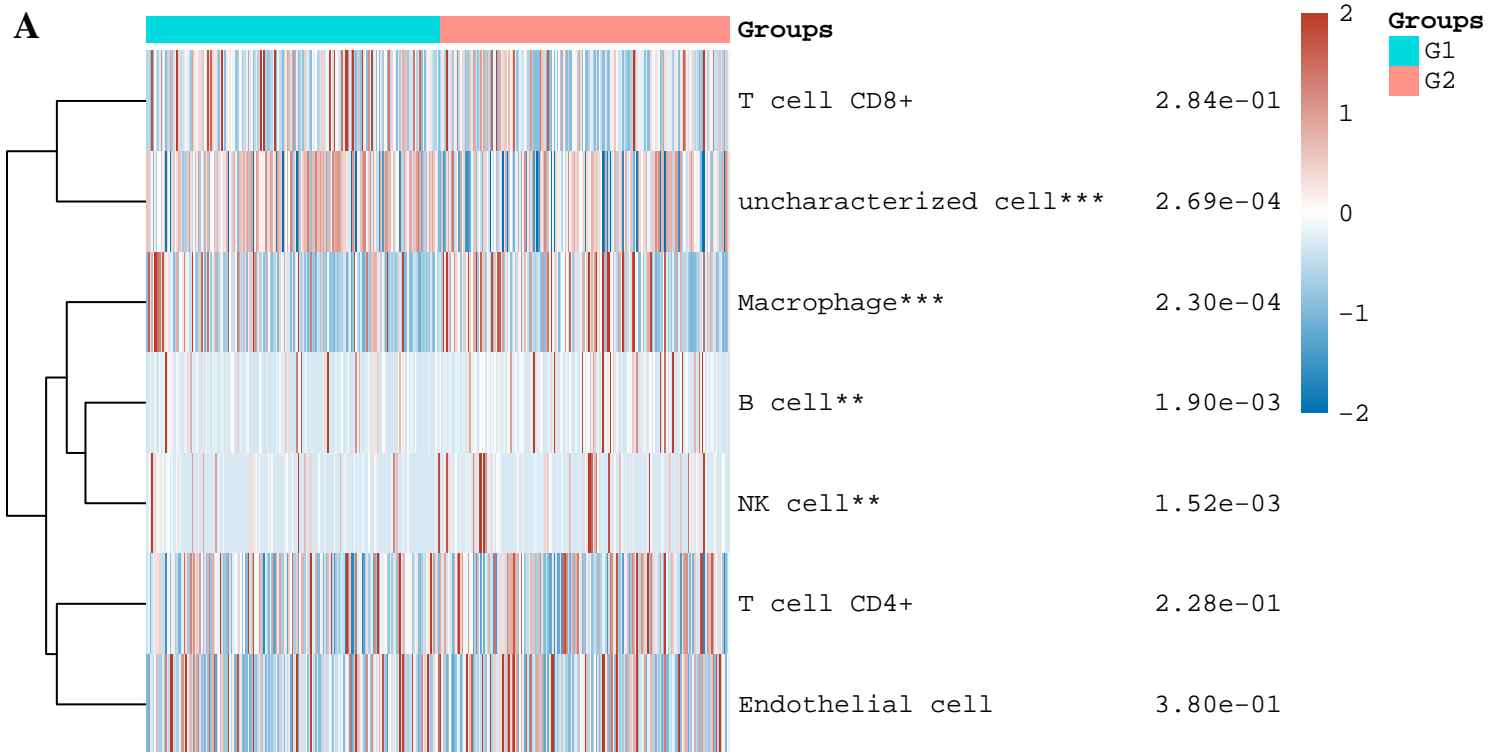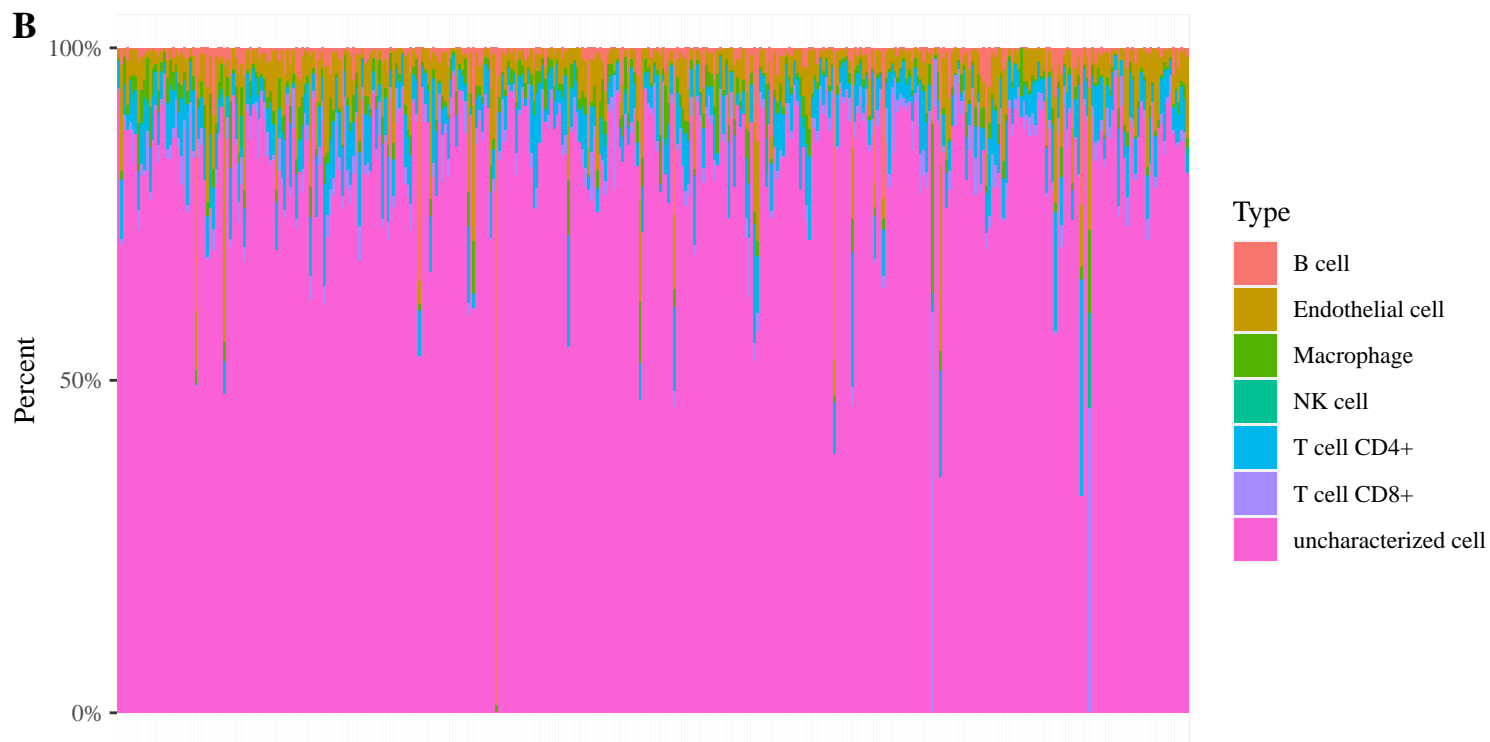

Supplement: Data_Sheet_12.ZIP [file Data_Sheet_12.ZIP]

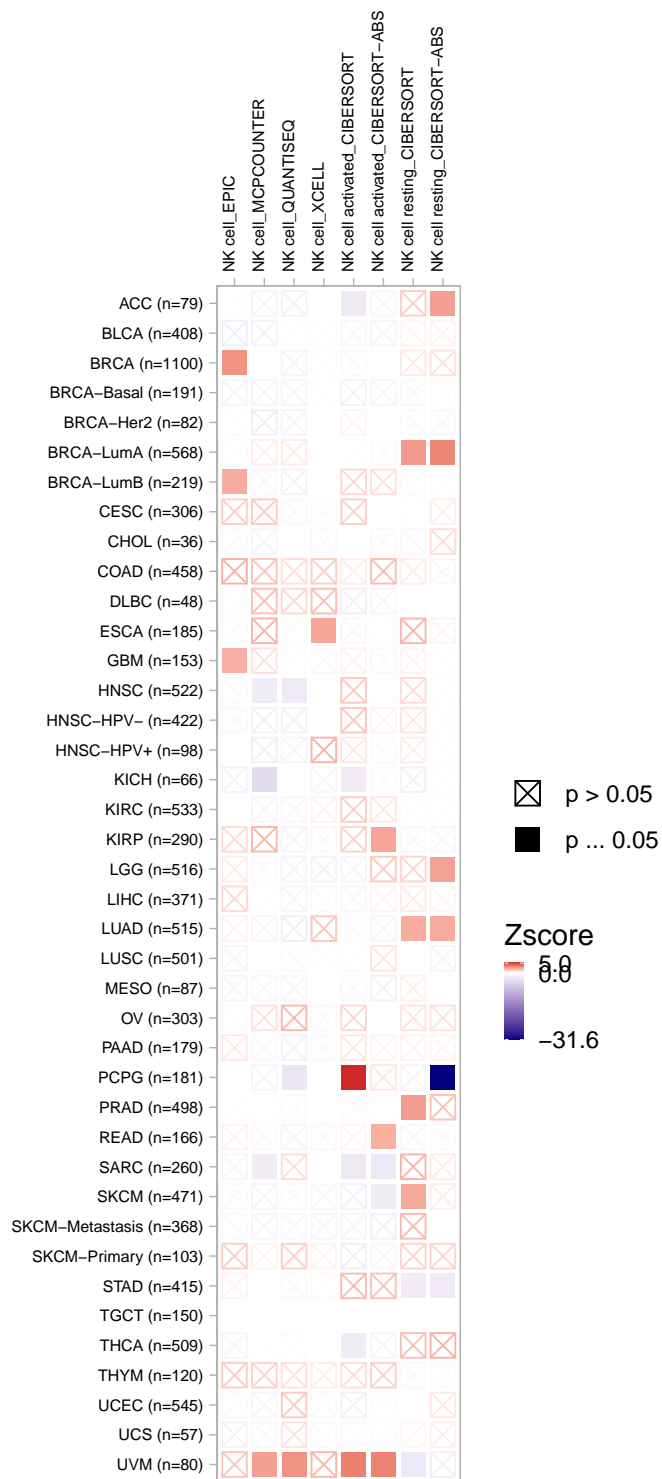

Supplement: Data_Sheet_12.ZIP [file Data_Sheet_12.ZIP]

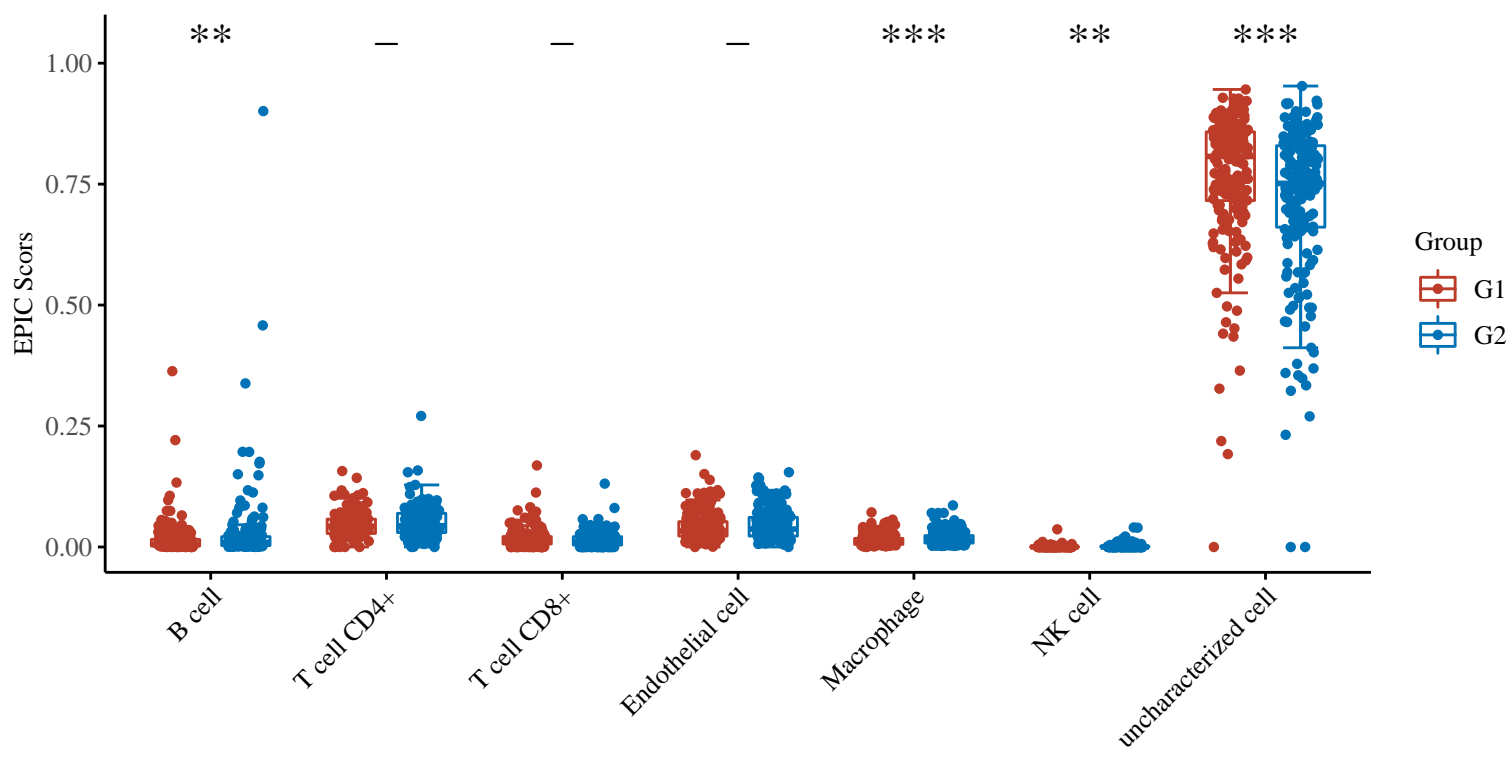

Supplement: Data_Sheet_12.ZIP [file Data_Sheet_12.ZIP]

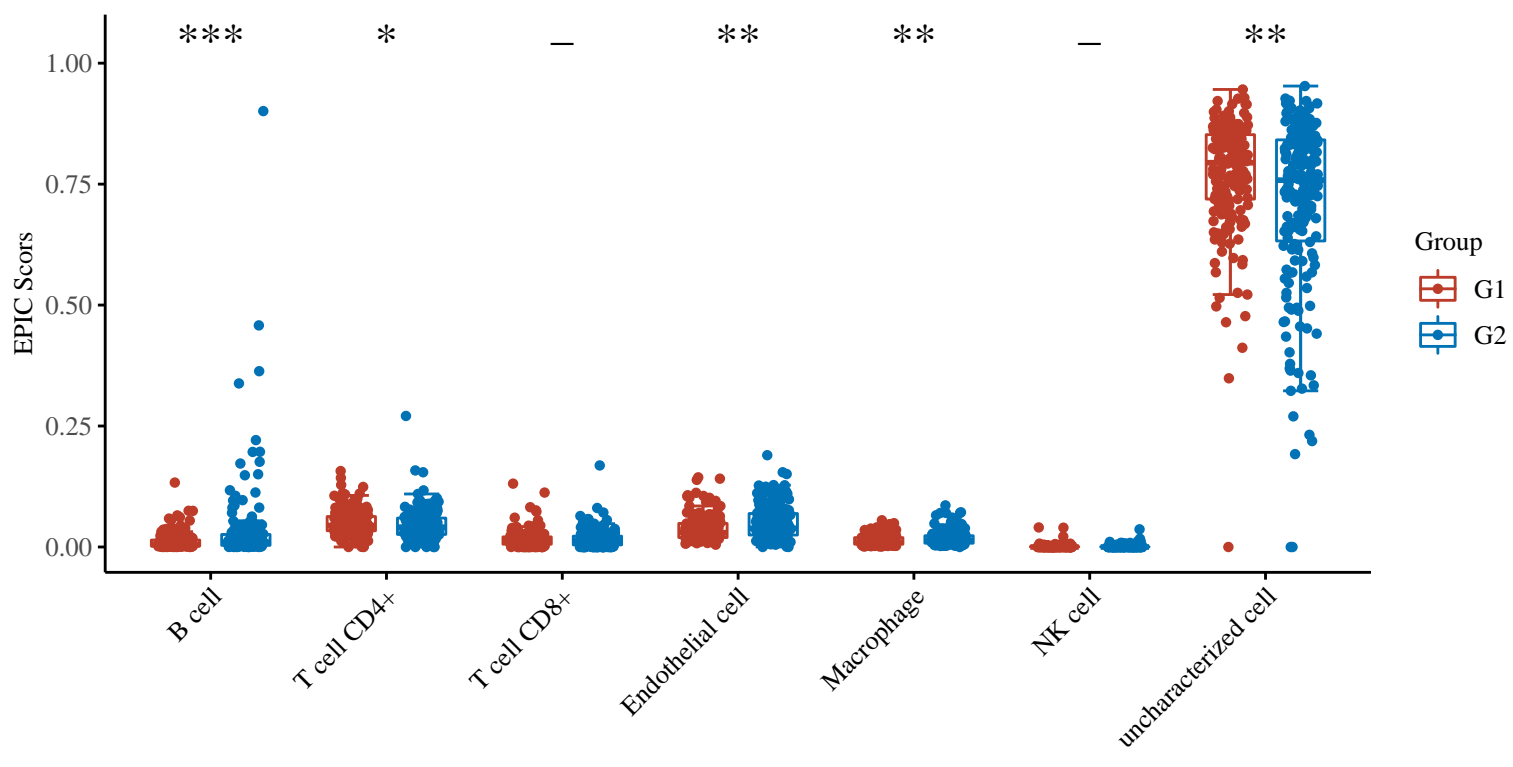

Supplement: Data_Sheet_12.ZIP [file Data_Sheet_12.ZIP]

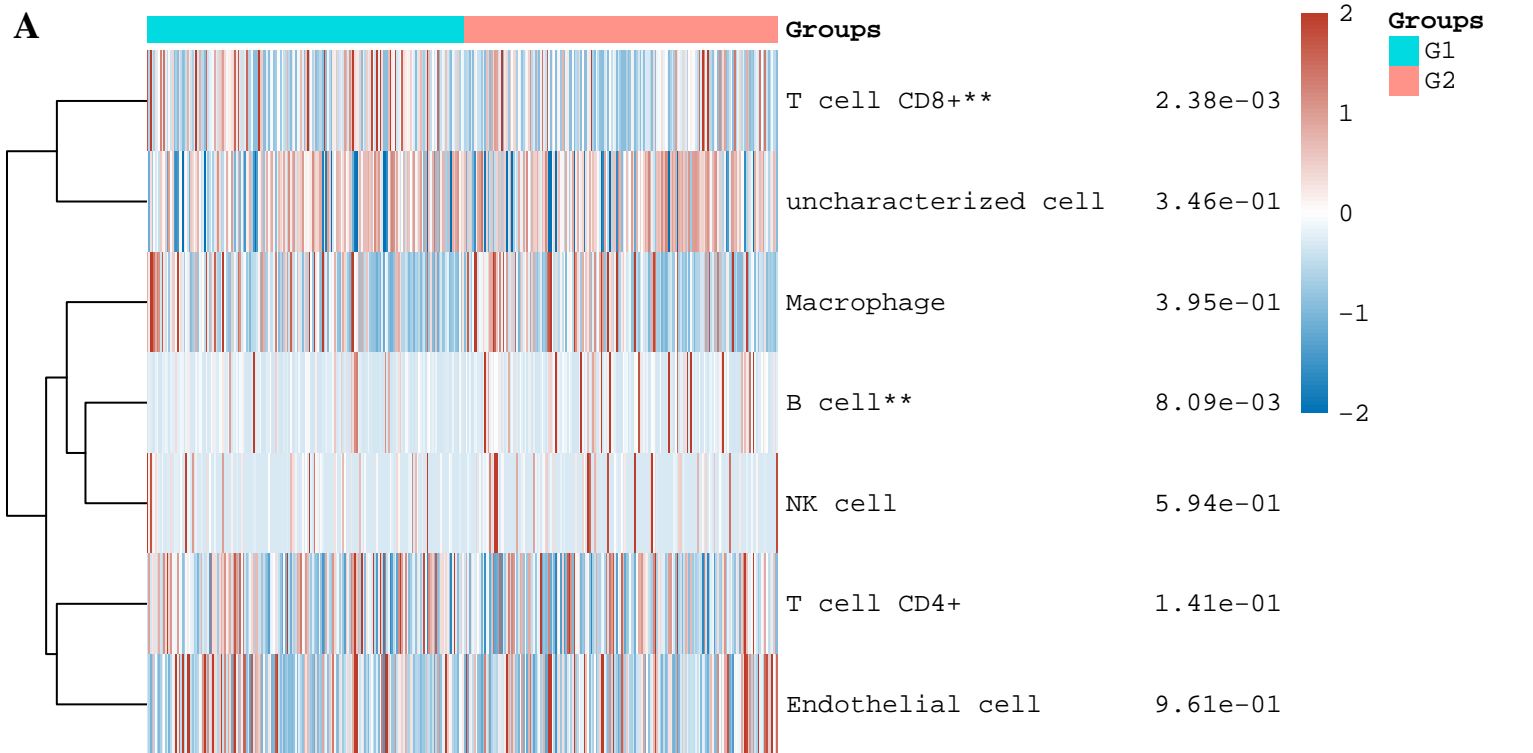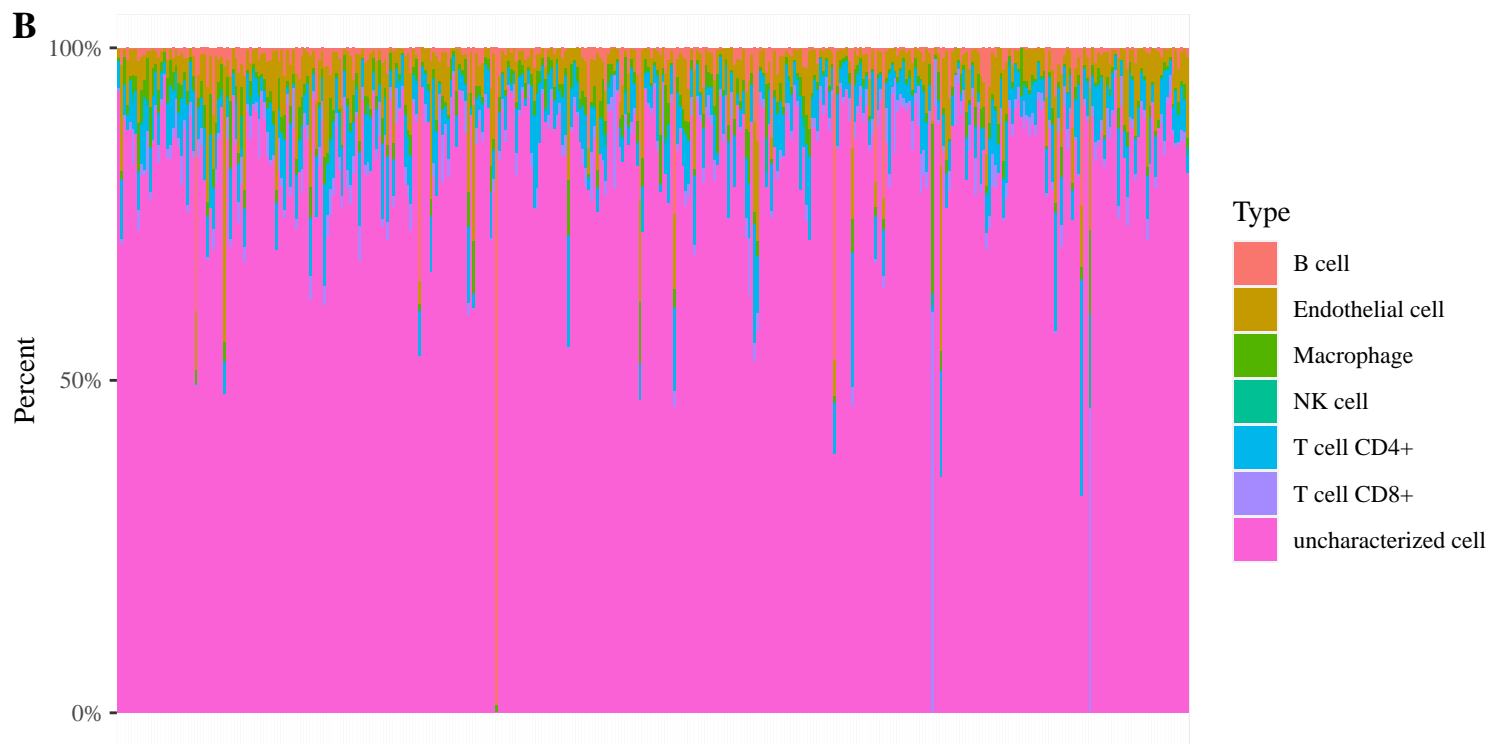

Supplement: Data_Sheet_12.ZIP [file Data_Sheet_12.ZIP]

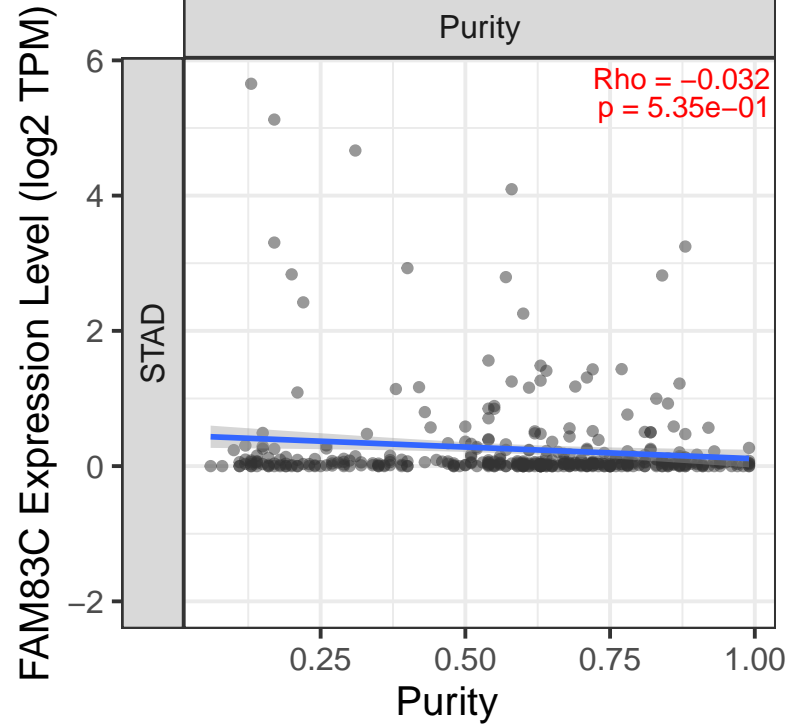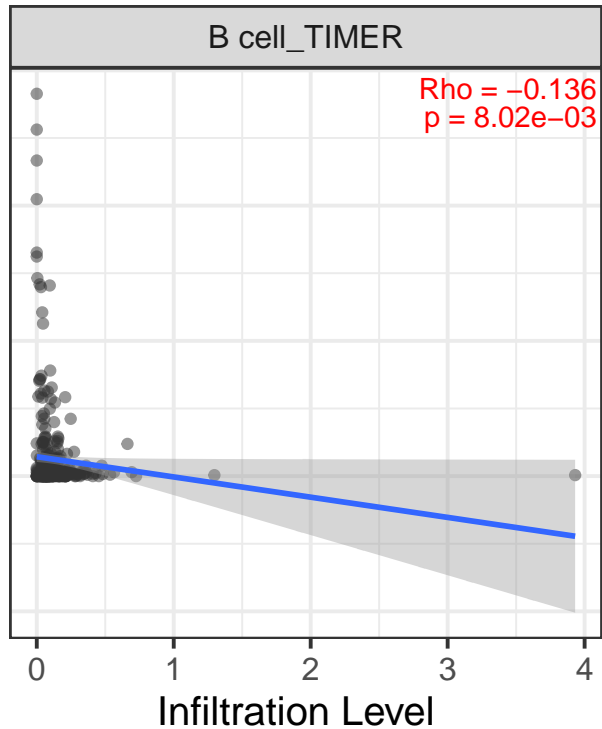

Supplement: Data_Sheet_12.ZIP [file Data_Sheet_12.ZIP]

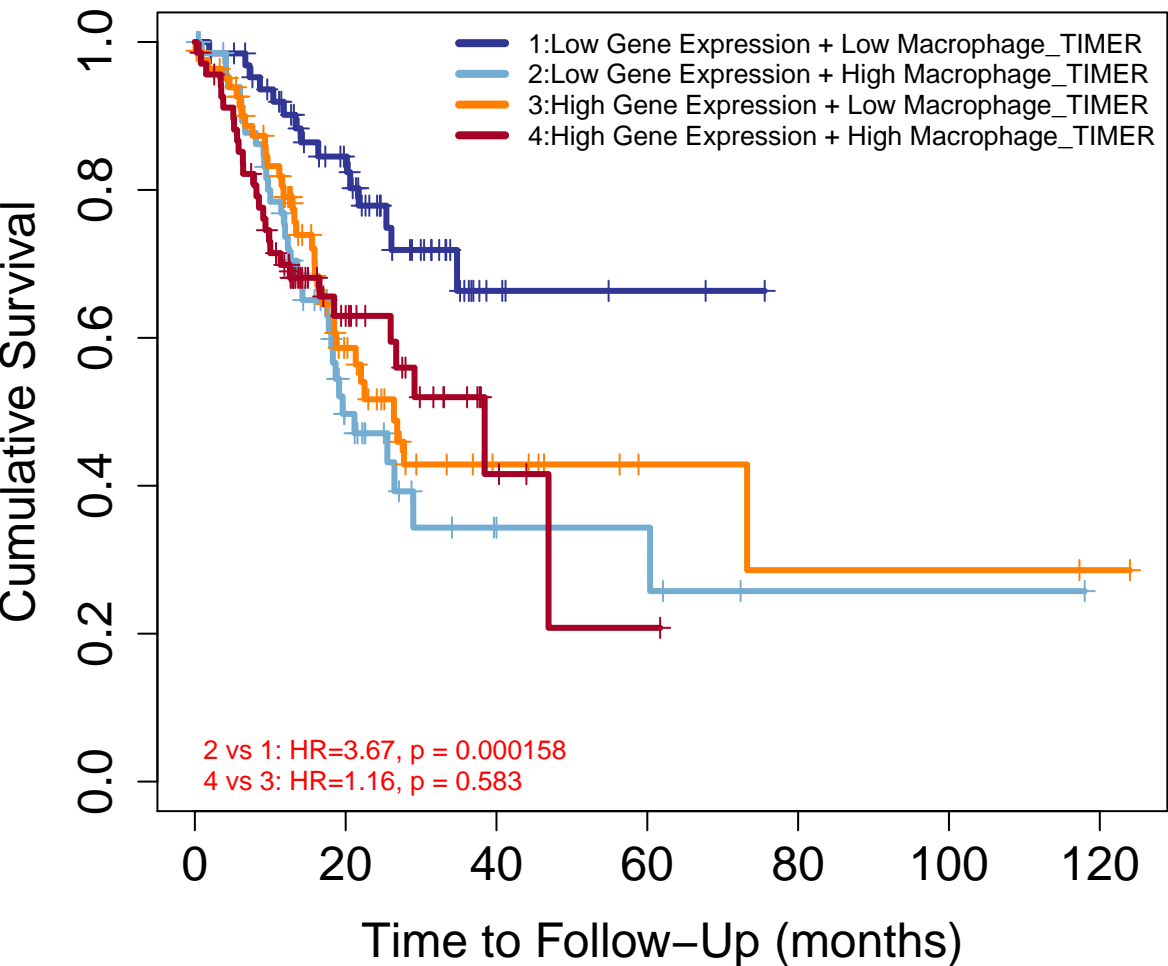

Supplement: Data_Sheet_12.ZIP [file Data_Sheet_12.ZIP]

# Expression of FAM83B in STAD based on Sample types

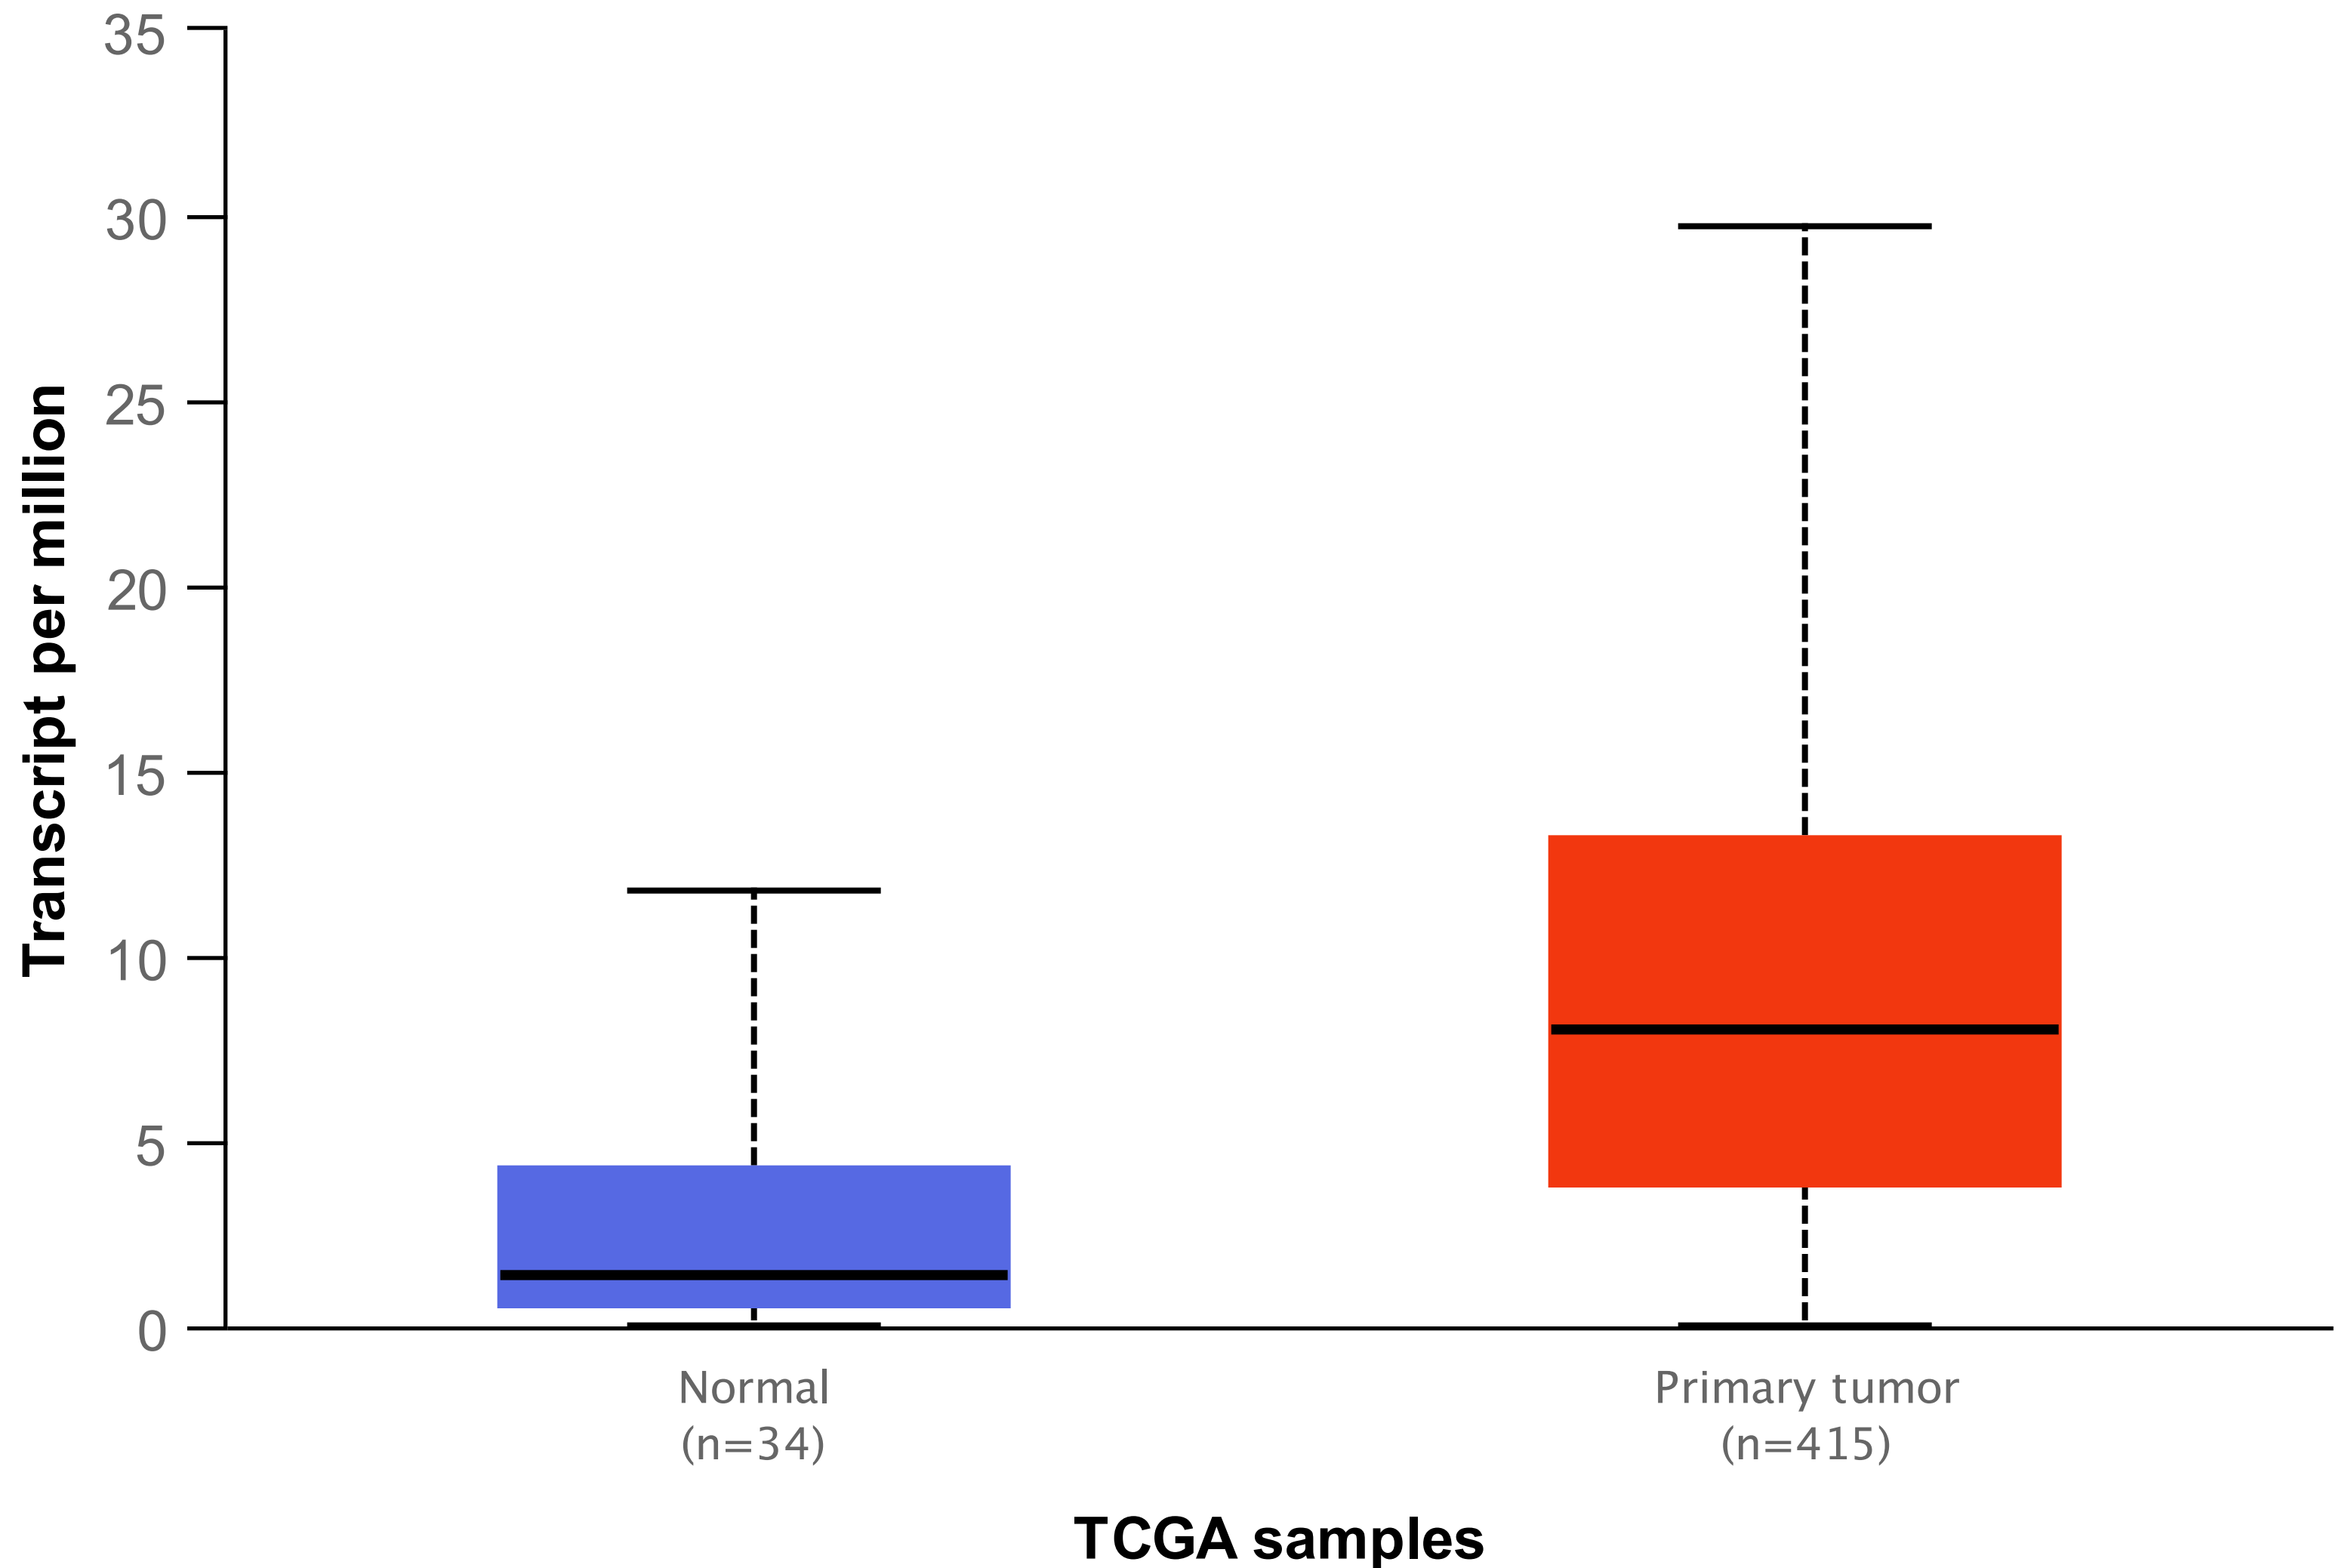

Supplement: Data_Sheet_2.ZIP [file Data_Sheet_2.ZIP]

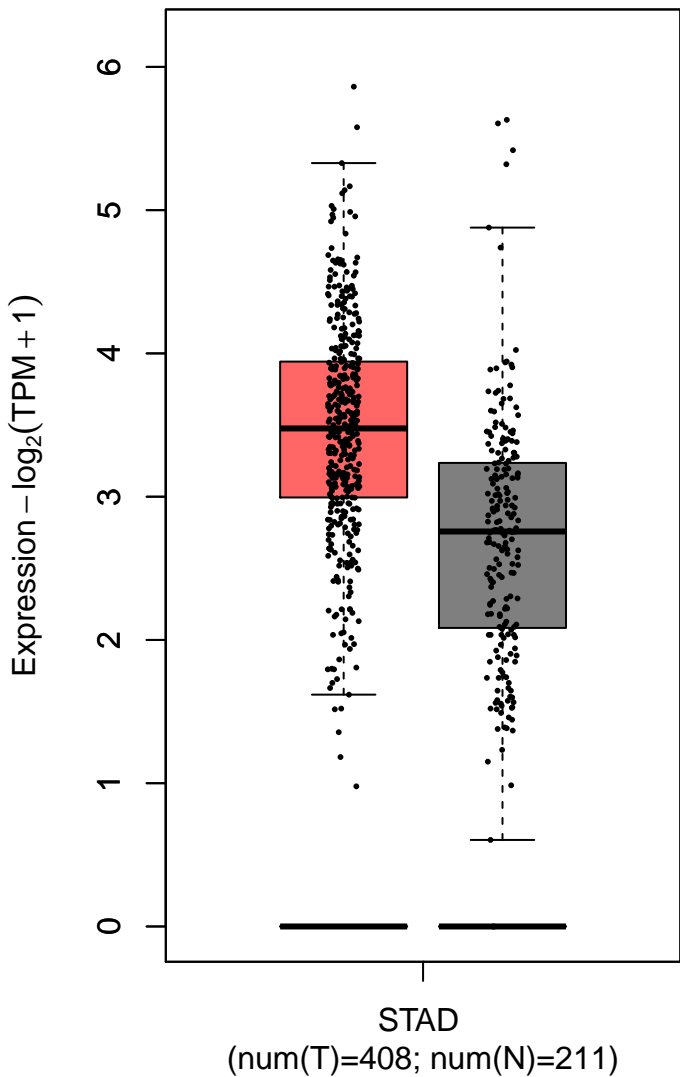

Supplement: Data_Sheet_2.ZIP [file Data_Sheet_2.ZIP]

# Expression of FAM83A in STAD based on Sample types

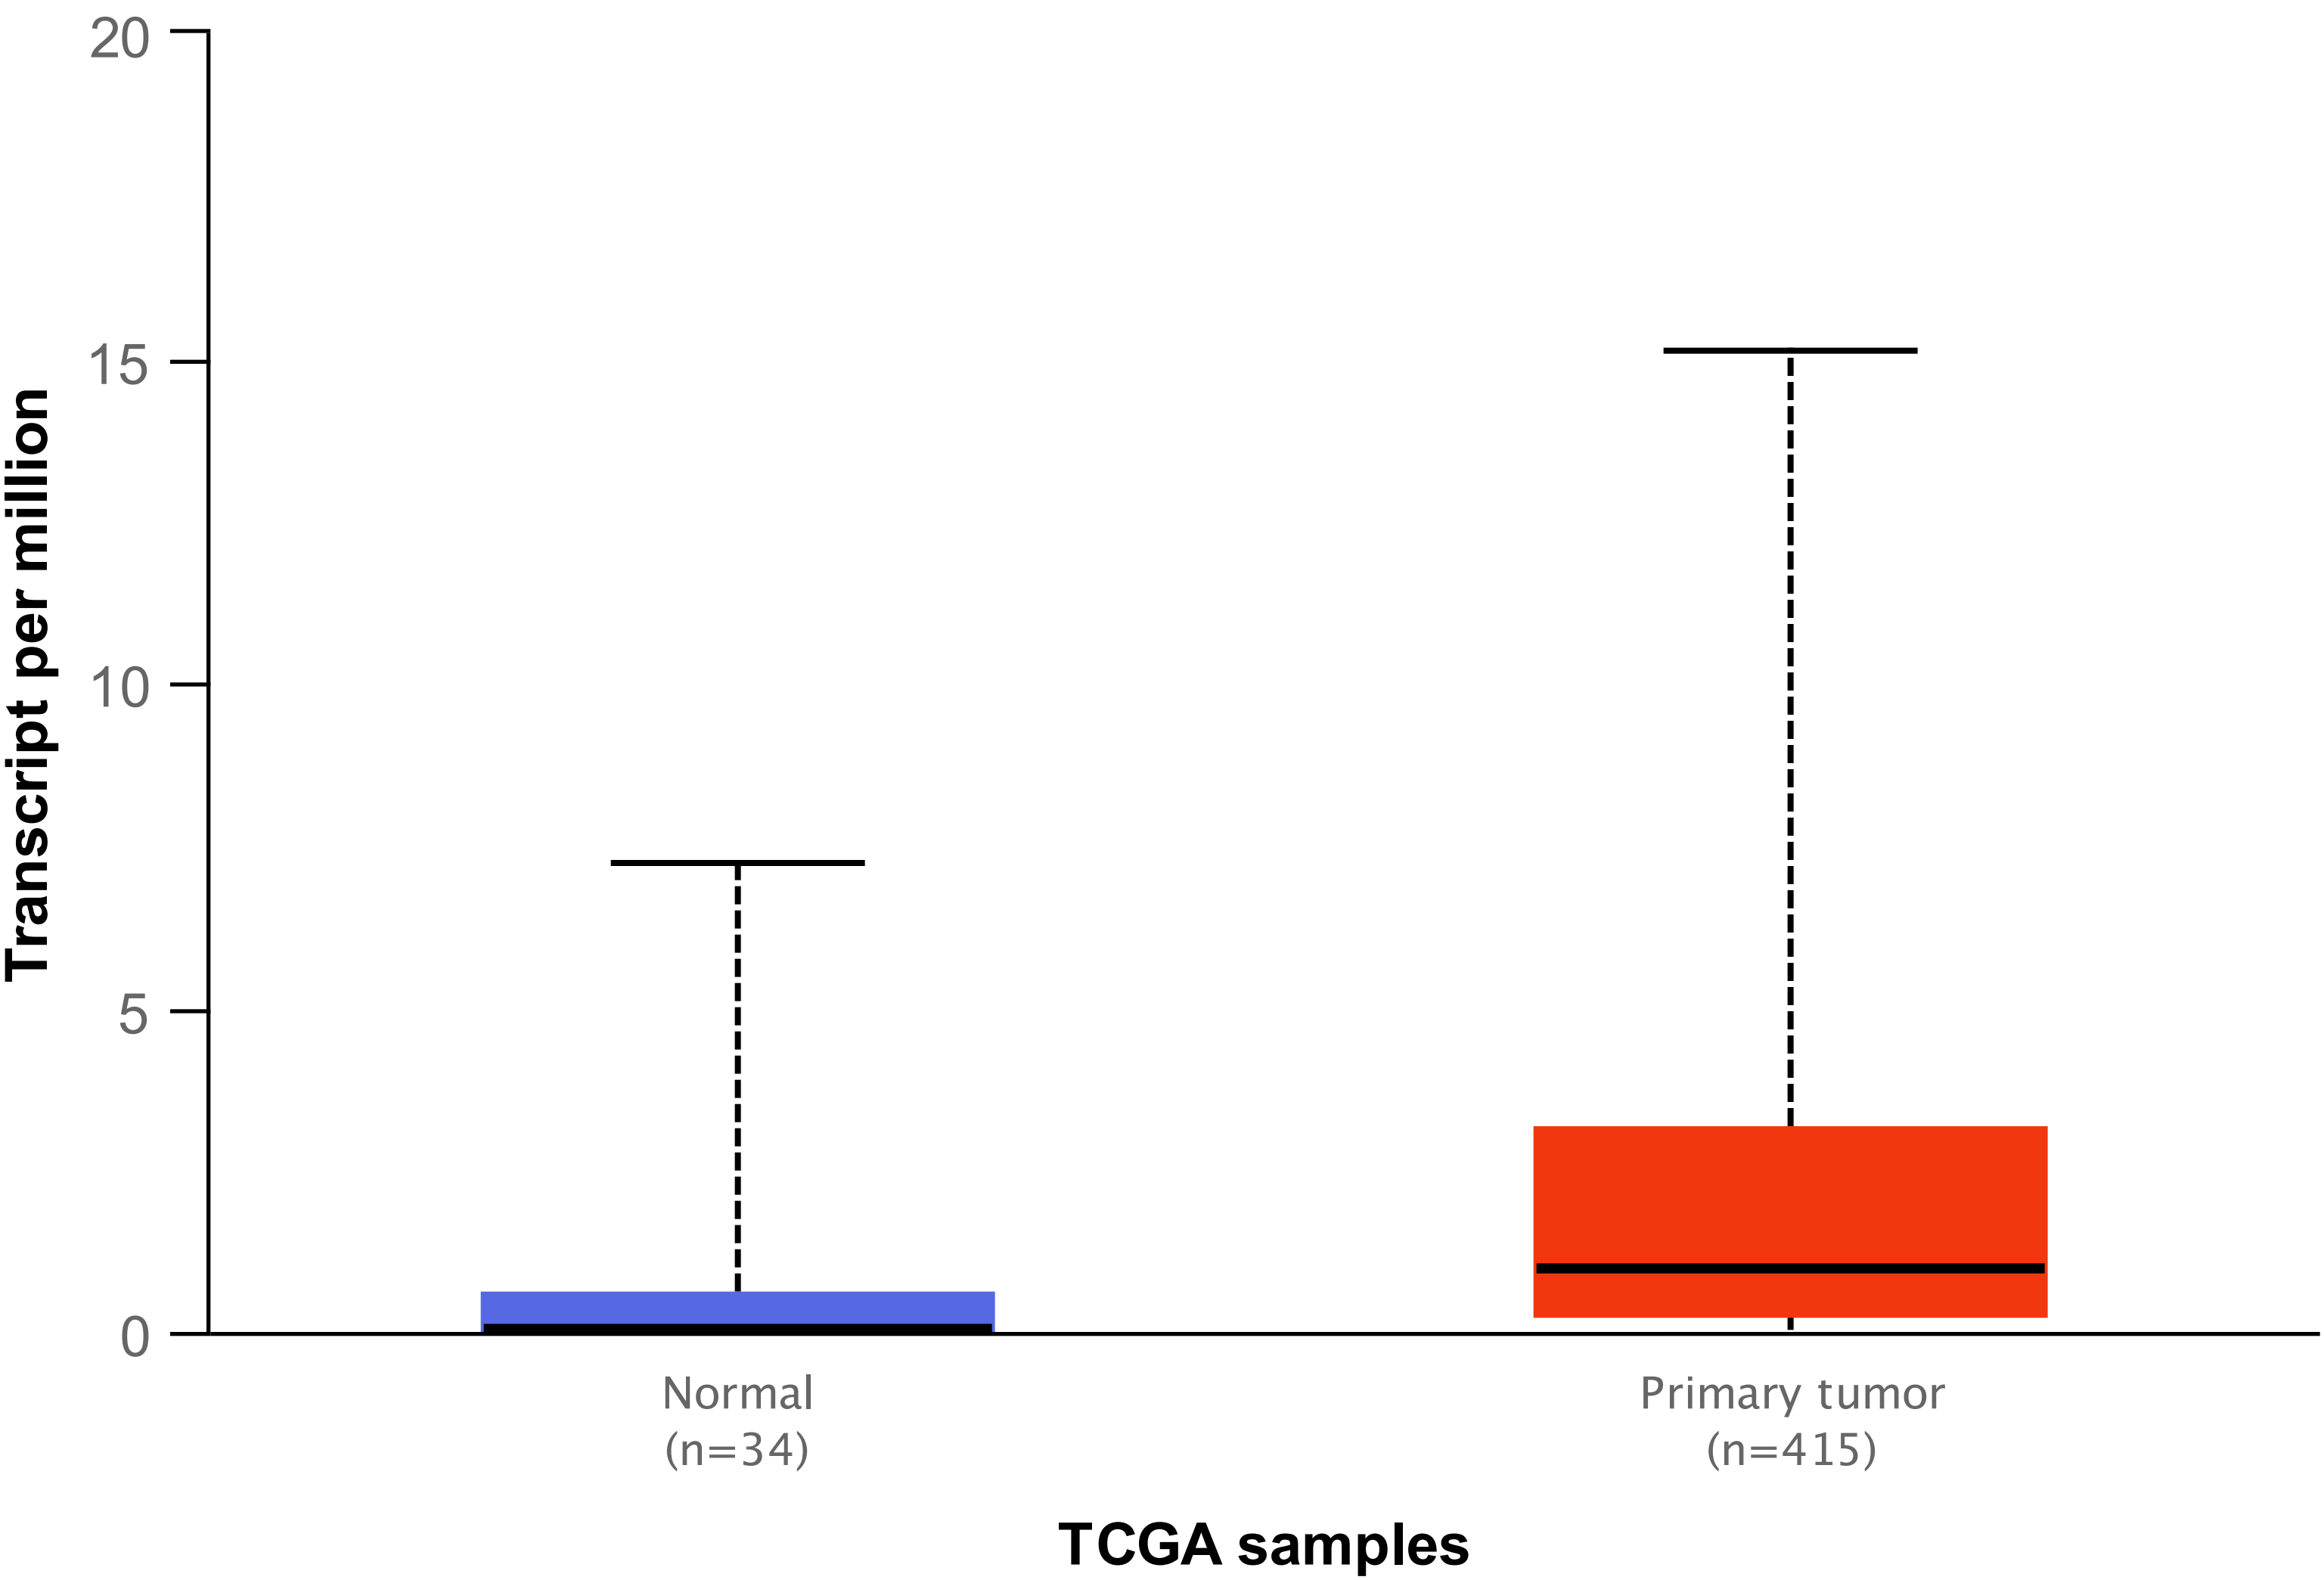

Supplement: Data_Sheet_2.ZIP [file Data_Sheet_2.ZIP]

# Expression of FAM83D in STAD based on Sample types

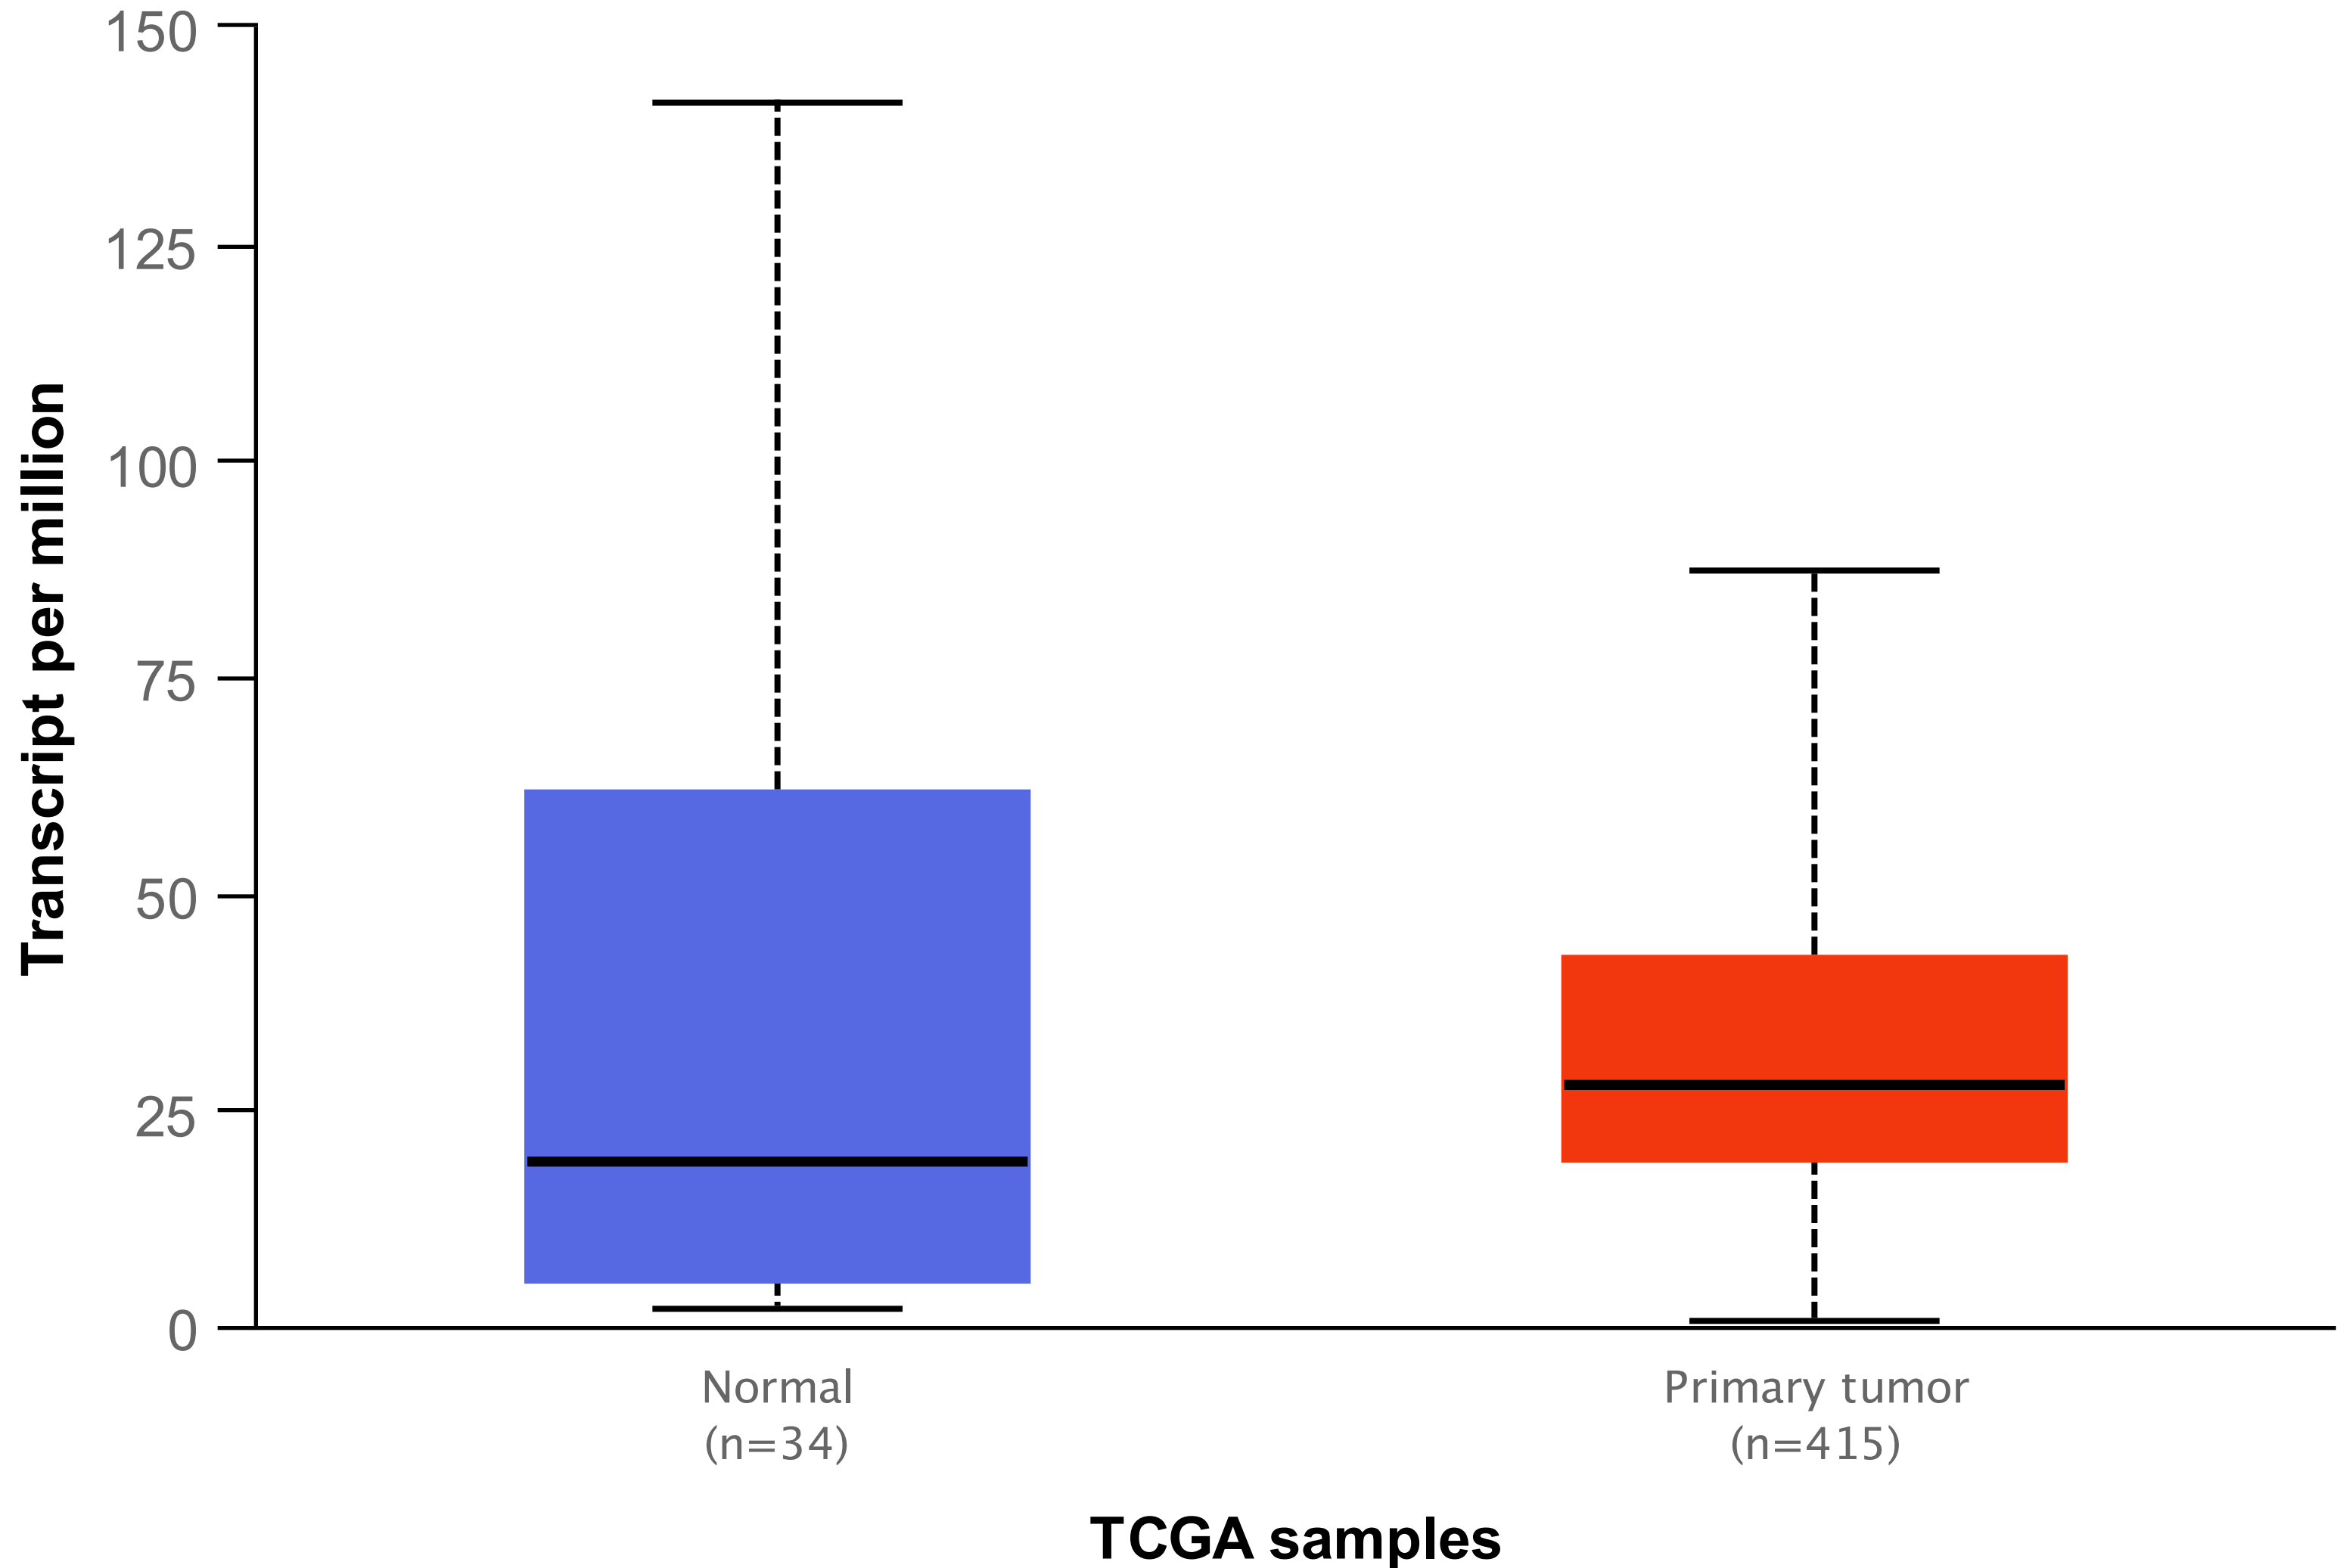

Supplement: Data_Sheet_2.ZIP [file Data_Sheet_2.ZIP]

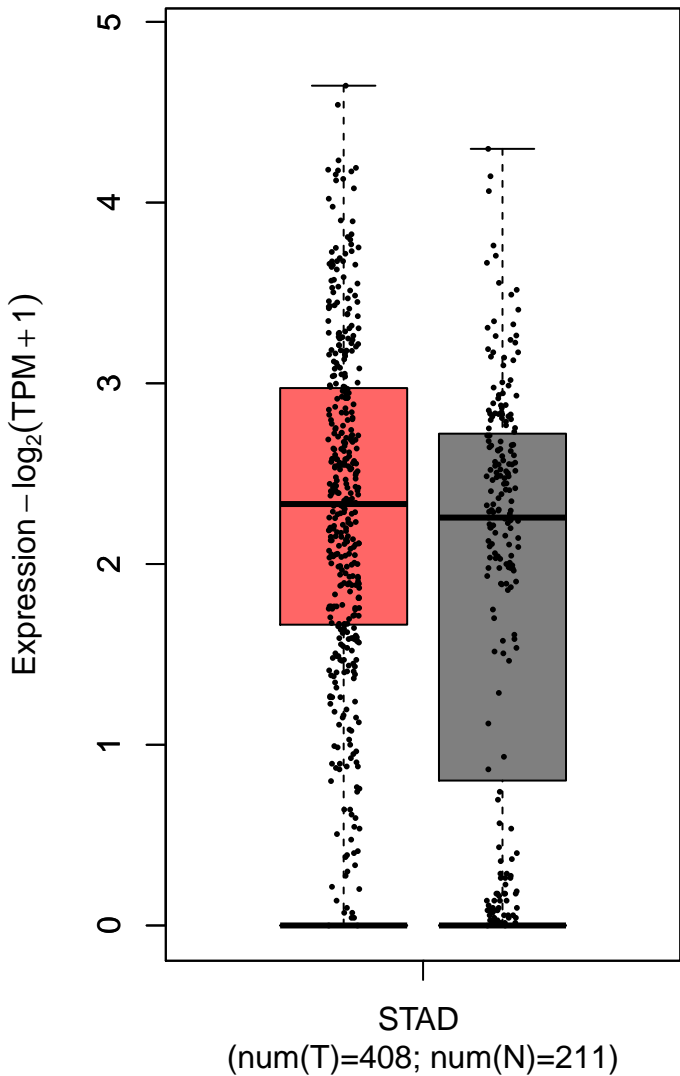

Supplement: Data_Sheet_2.ZIP [file Data_Sheet_2.ZIP]

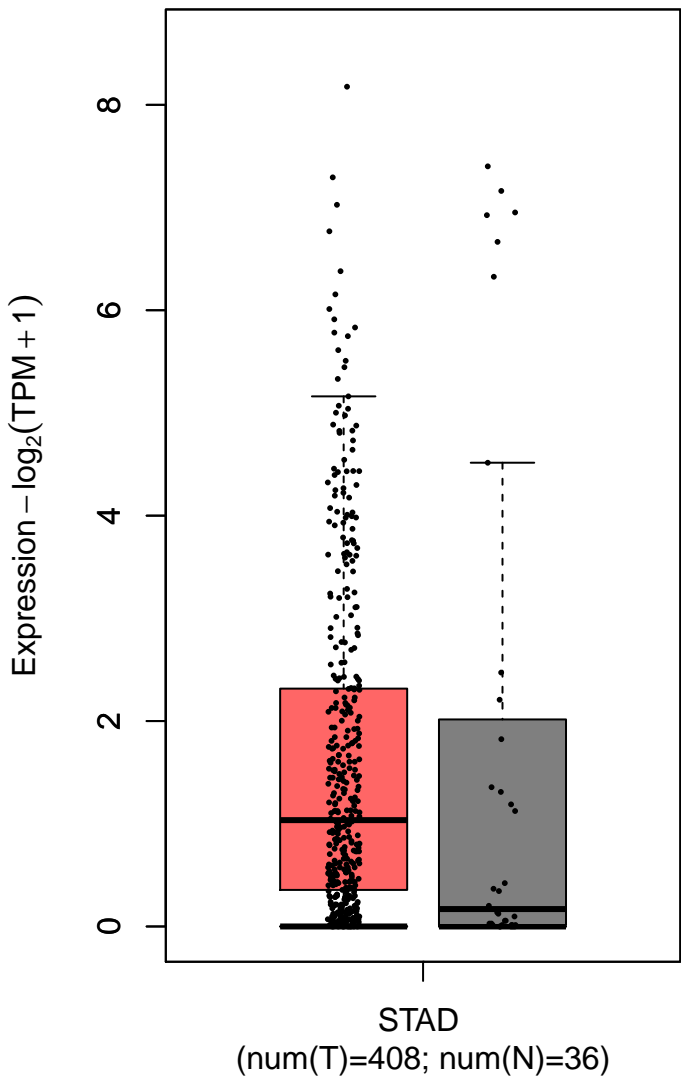

Supplement: Data_Sheet_2.ZIP [file Data_Sheet_2.ZIP]

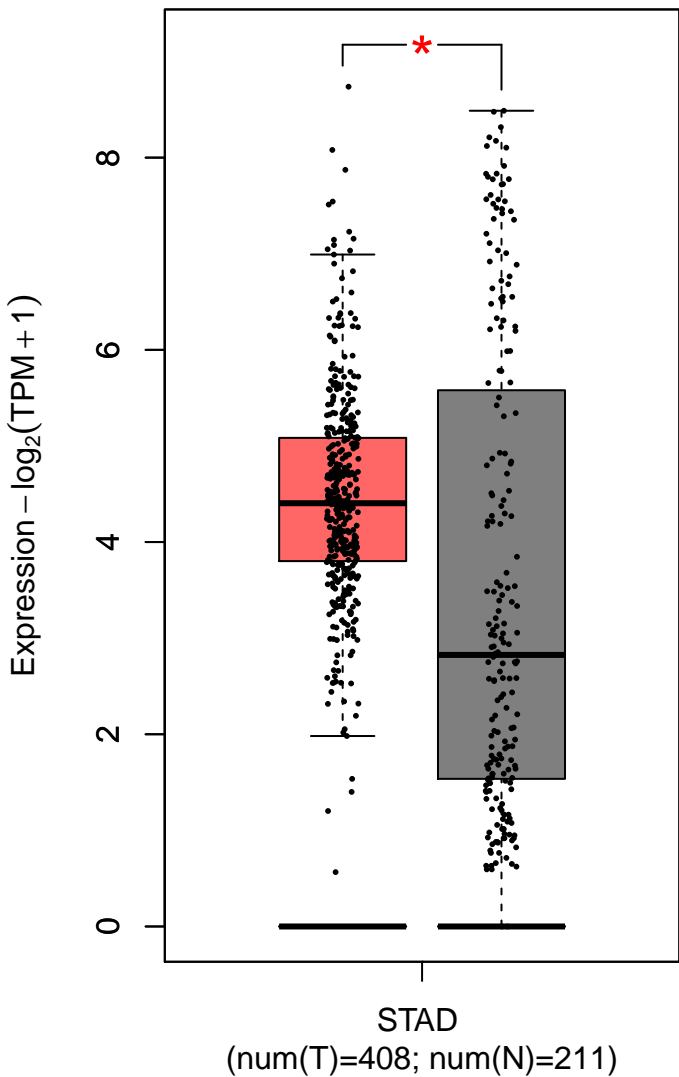

Supplement: Data_Sheet_2.ZIP [file Data_Sheet_2.ZIP]

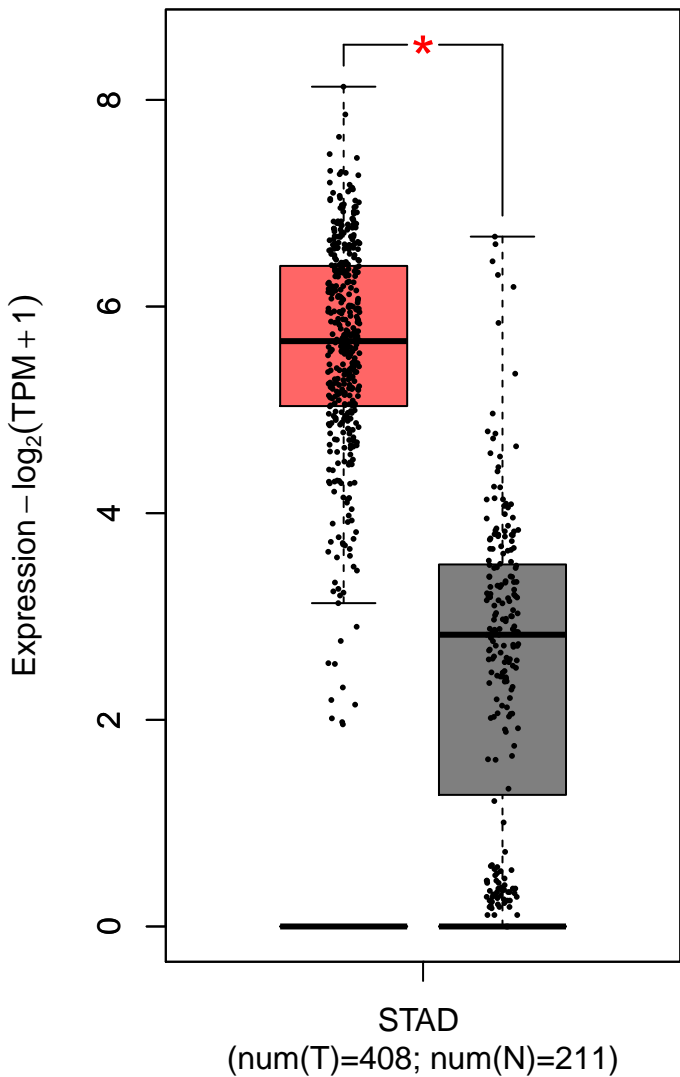

Supplement: Data_Sheet_2.ZIP [file Data_Sheet_2.ZIP]

# Expression of FAM83G in STAD based on Sample types

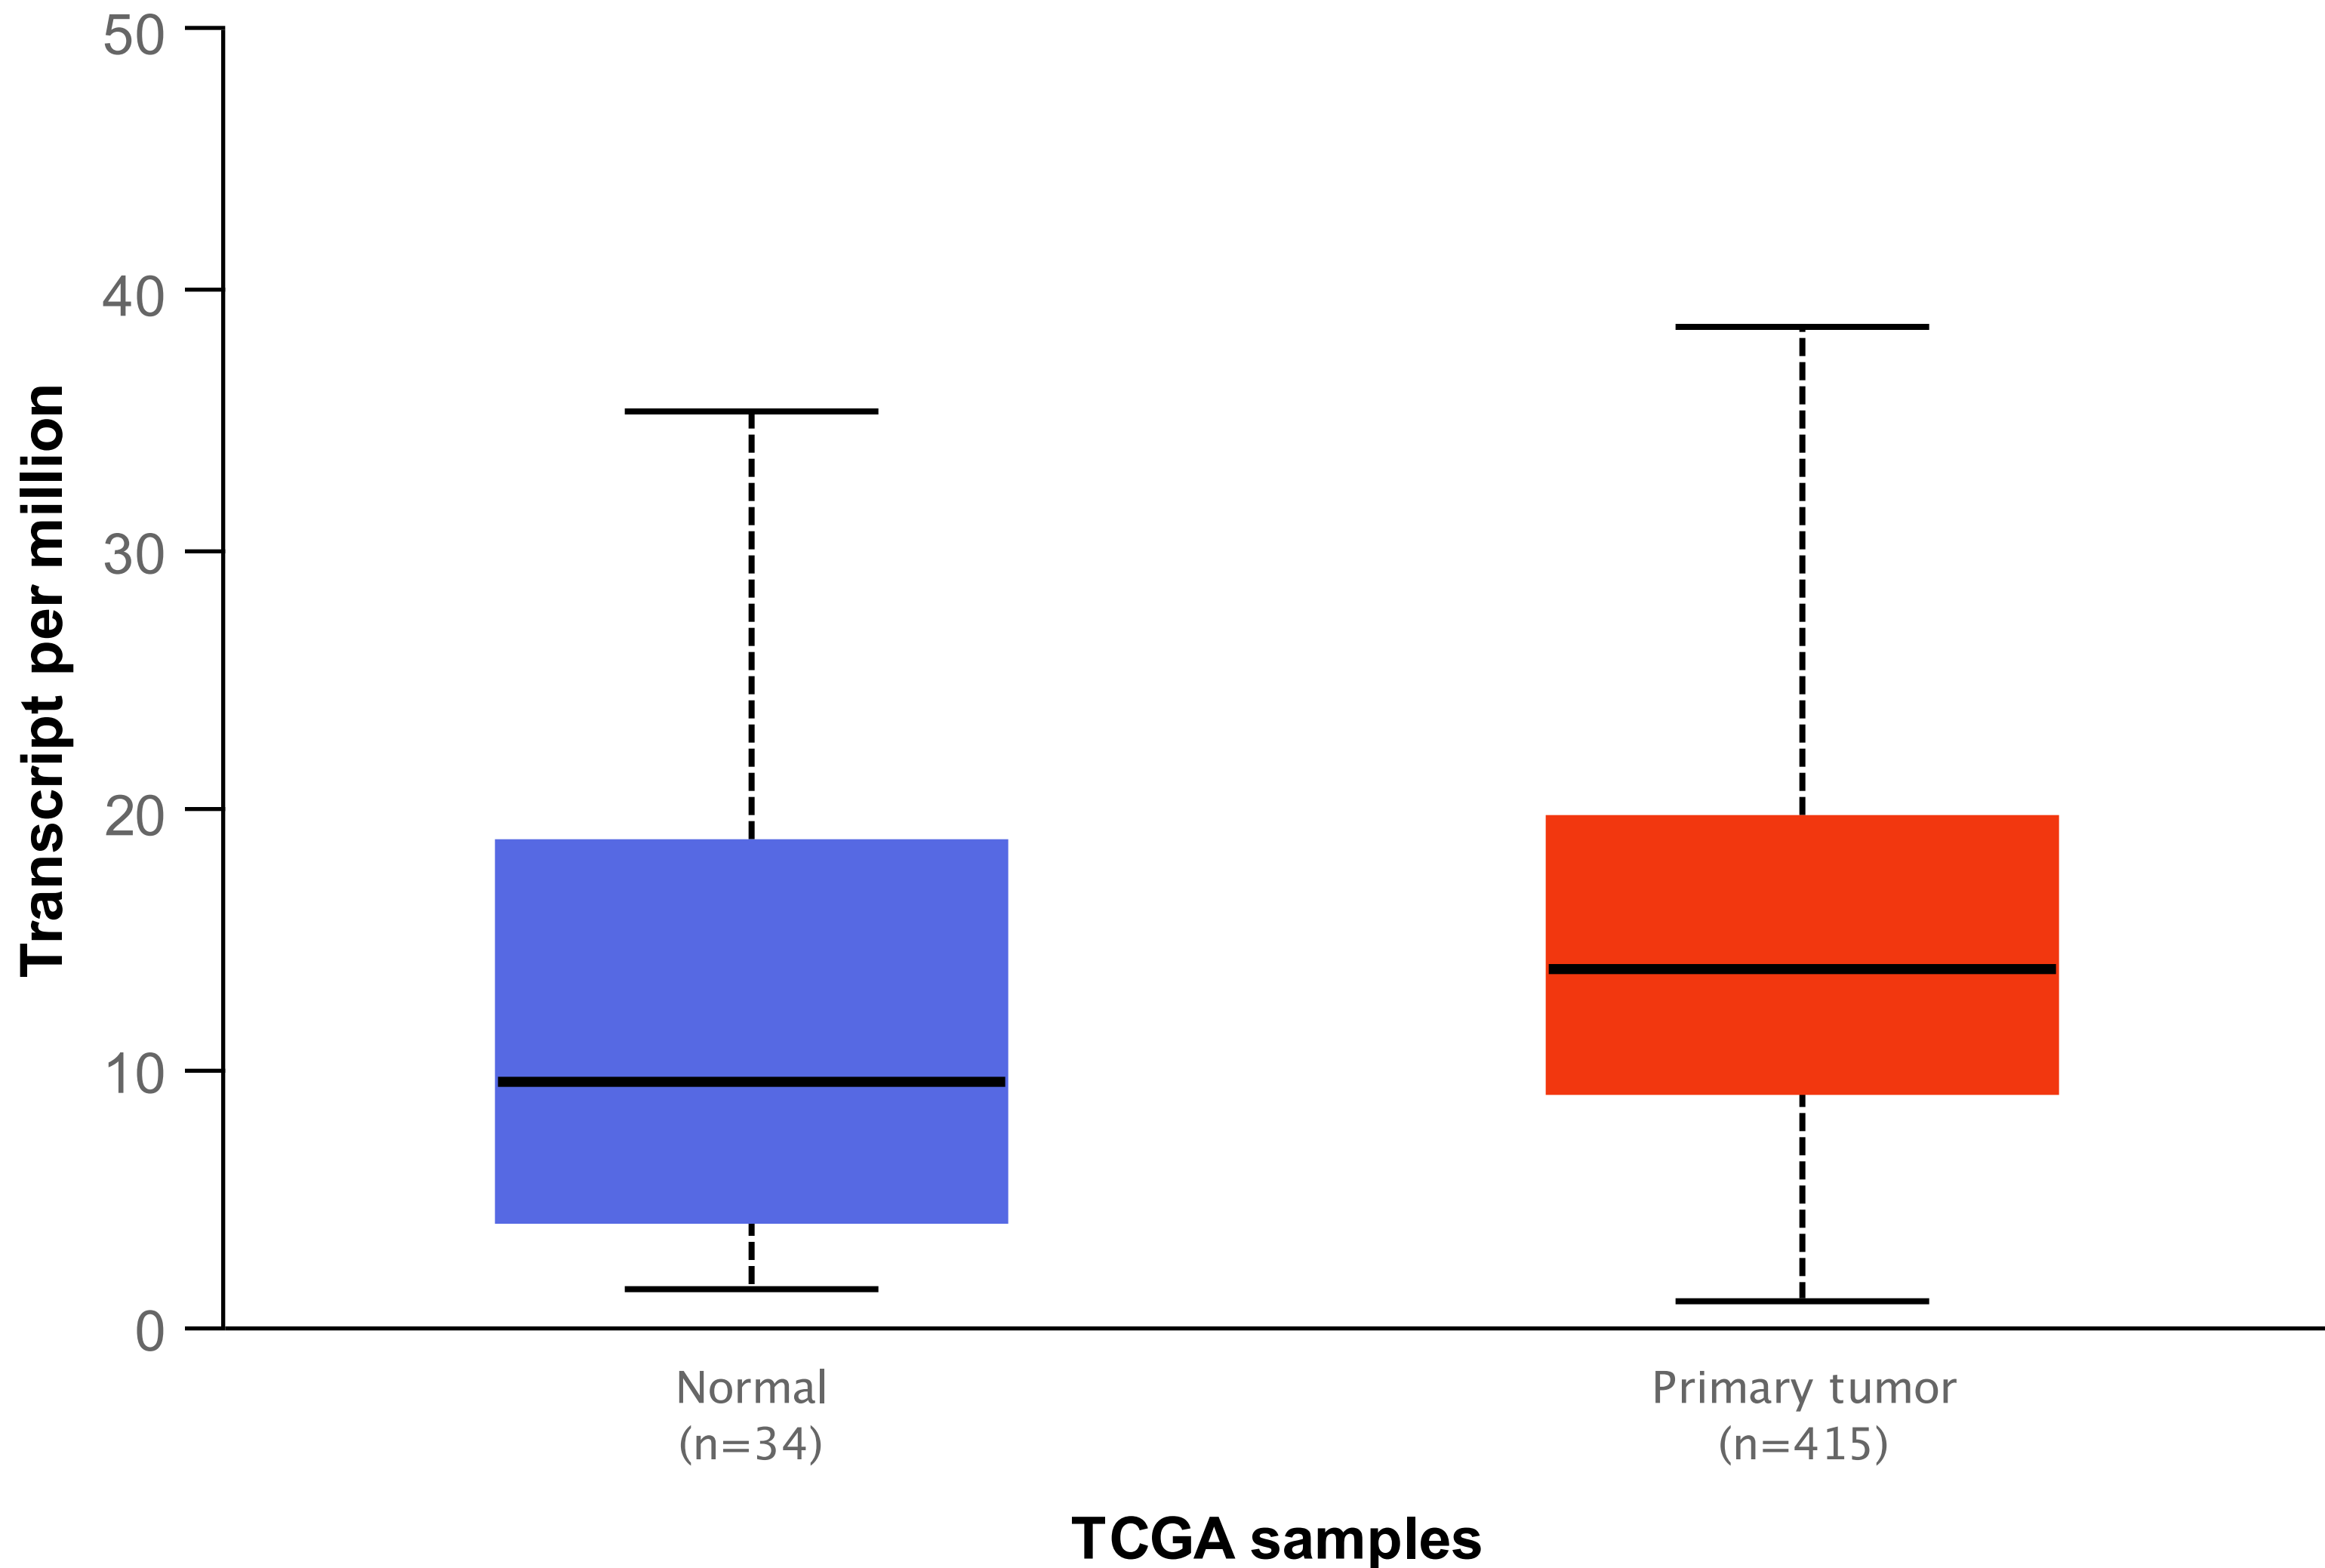

Supplement: Data_Sheet_2.ZIP [file Data_Sheet_2.ZIP]

Expression  $-\log_2(\text{TPM} + 1)$

5  
4  
3  
2  
1  
0

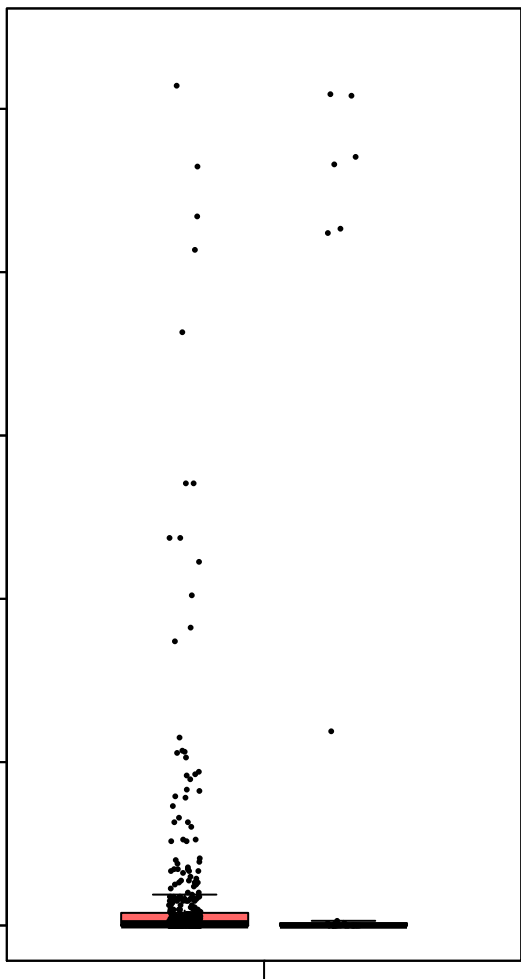

STAD

(num(T)=408; num(N)=36)

Supplement: Data_Sheet_2.ZIP [file Data_Sheet_2.ZIP]

Expression  $-\log_2(\text{TPM} + 1)$

6  
5  
4  
3  
2  
1  
0

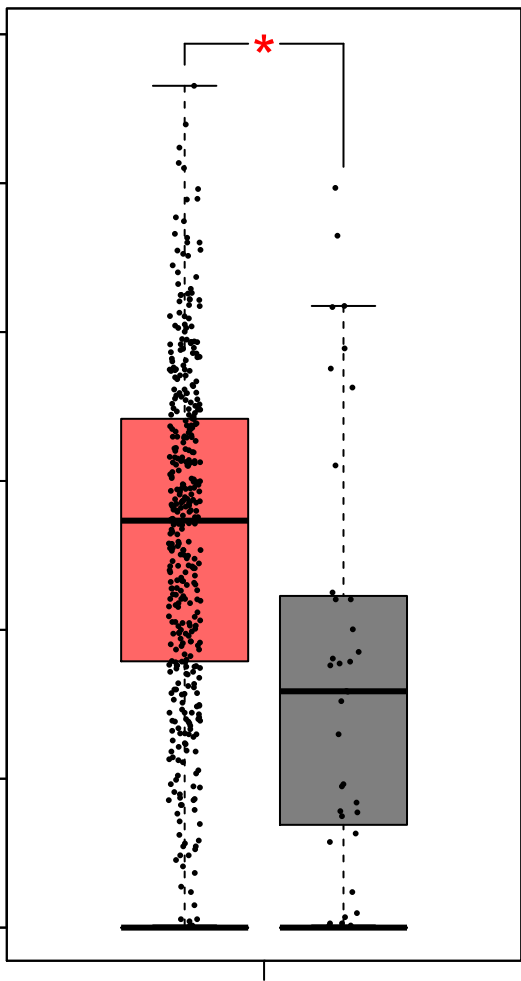

STAD

(num(T)=408; num(N)=36)

Supplement: Data_Sheet_2.ZIP [file Data_Sheet_2.ZIP]

# Expression of FAM83F in STAD based on Sample types

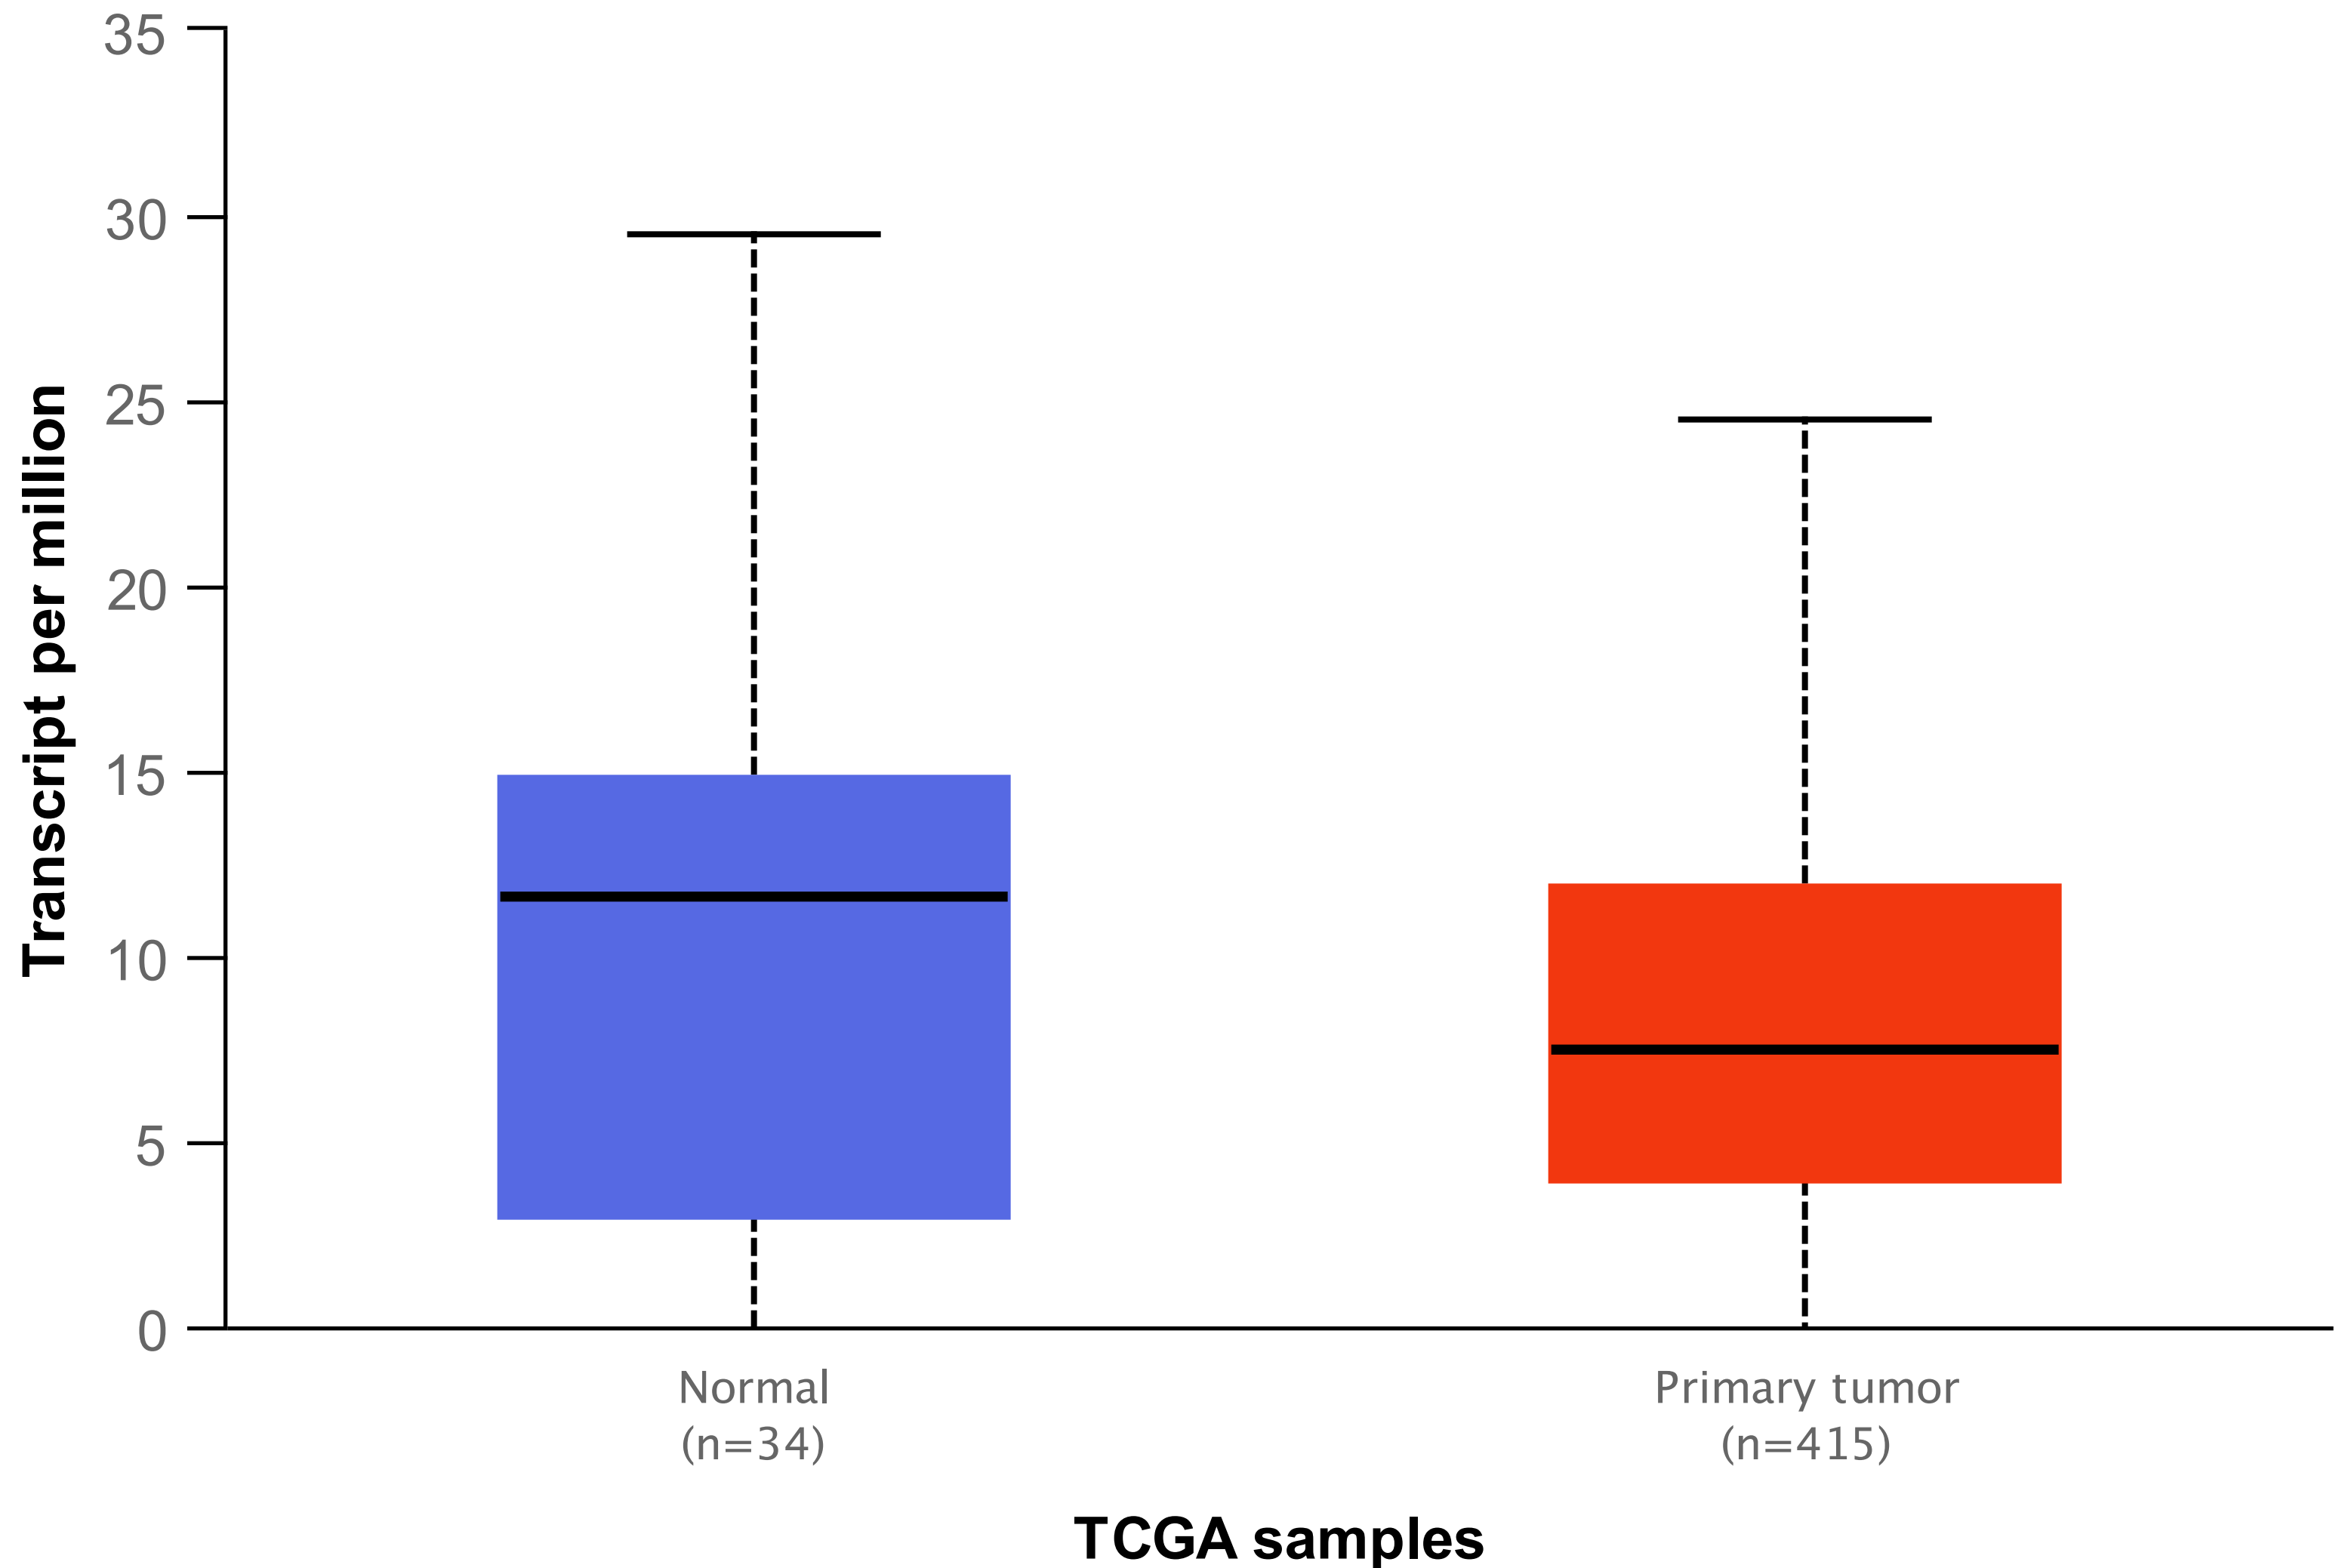

Supplement: Data_Sheet_2.ZIP [file Data_Sheet_2.ZIP]

# Expression of FAM83C in STAD based on Sample types

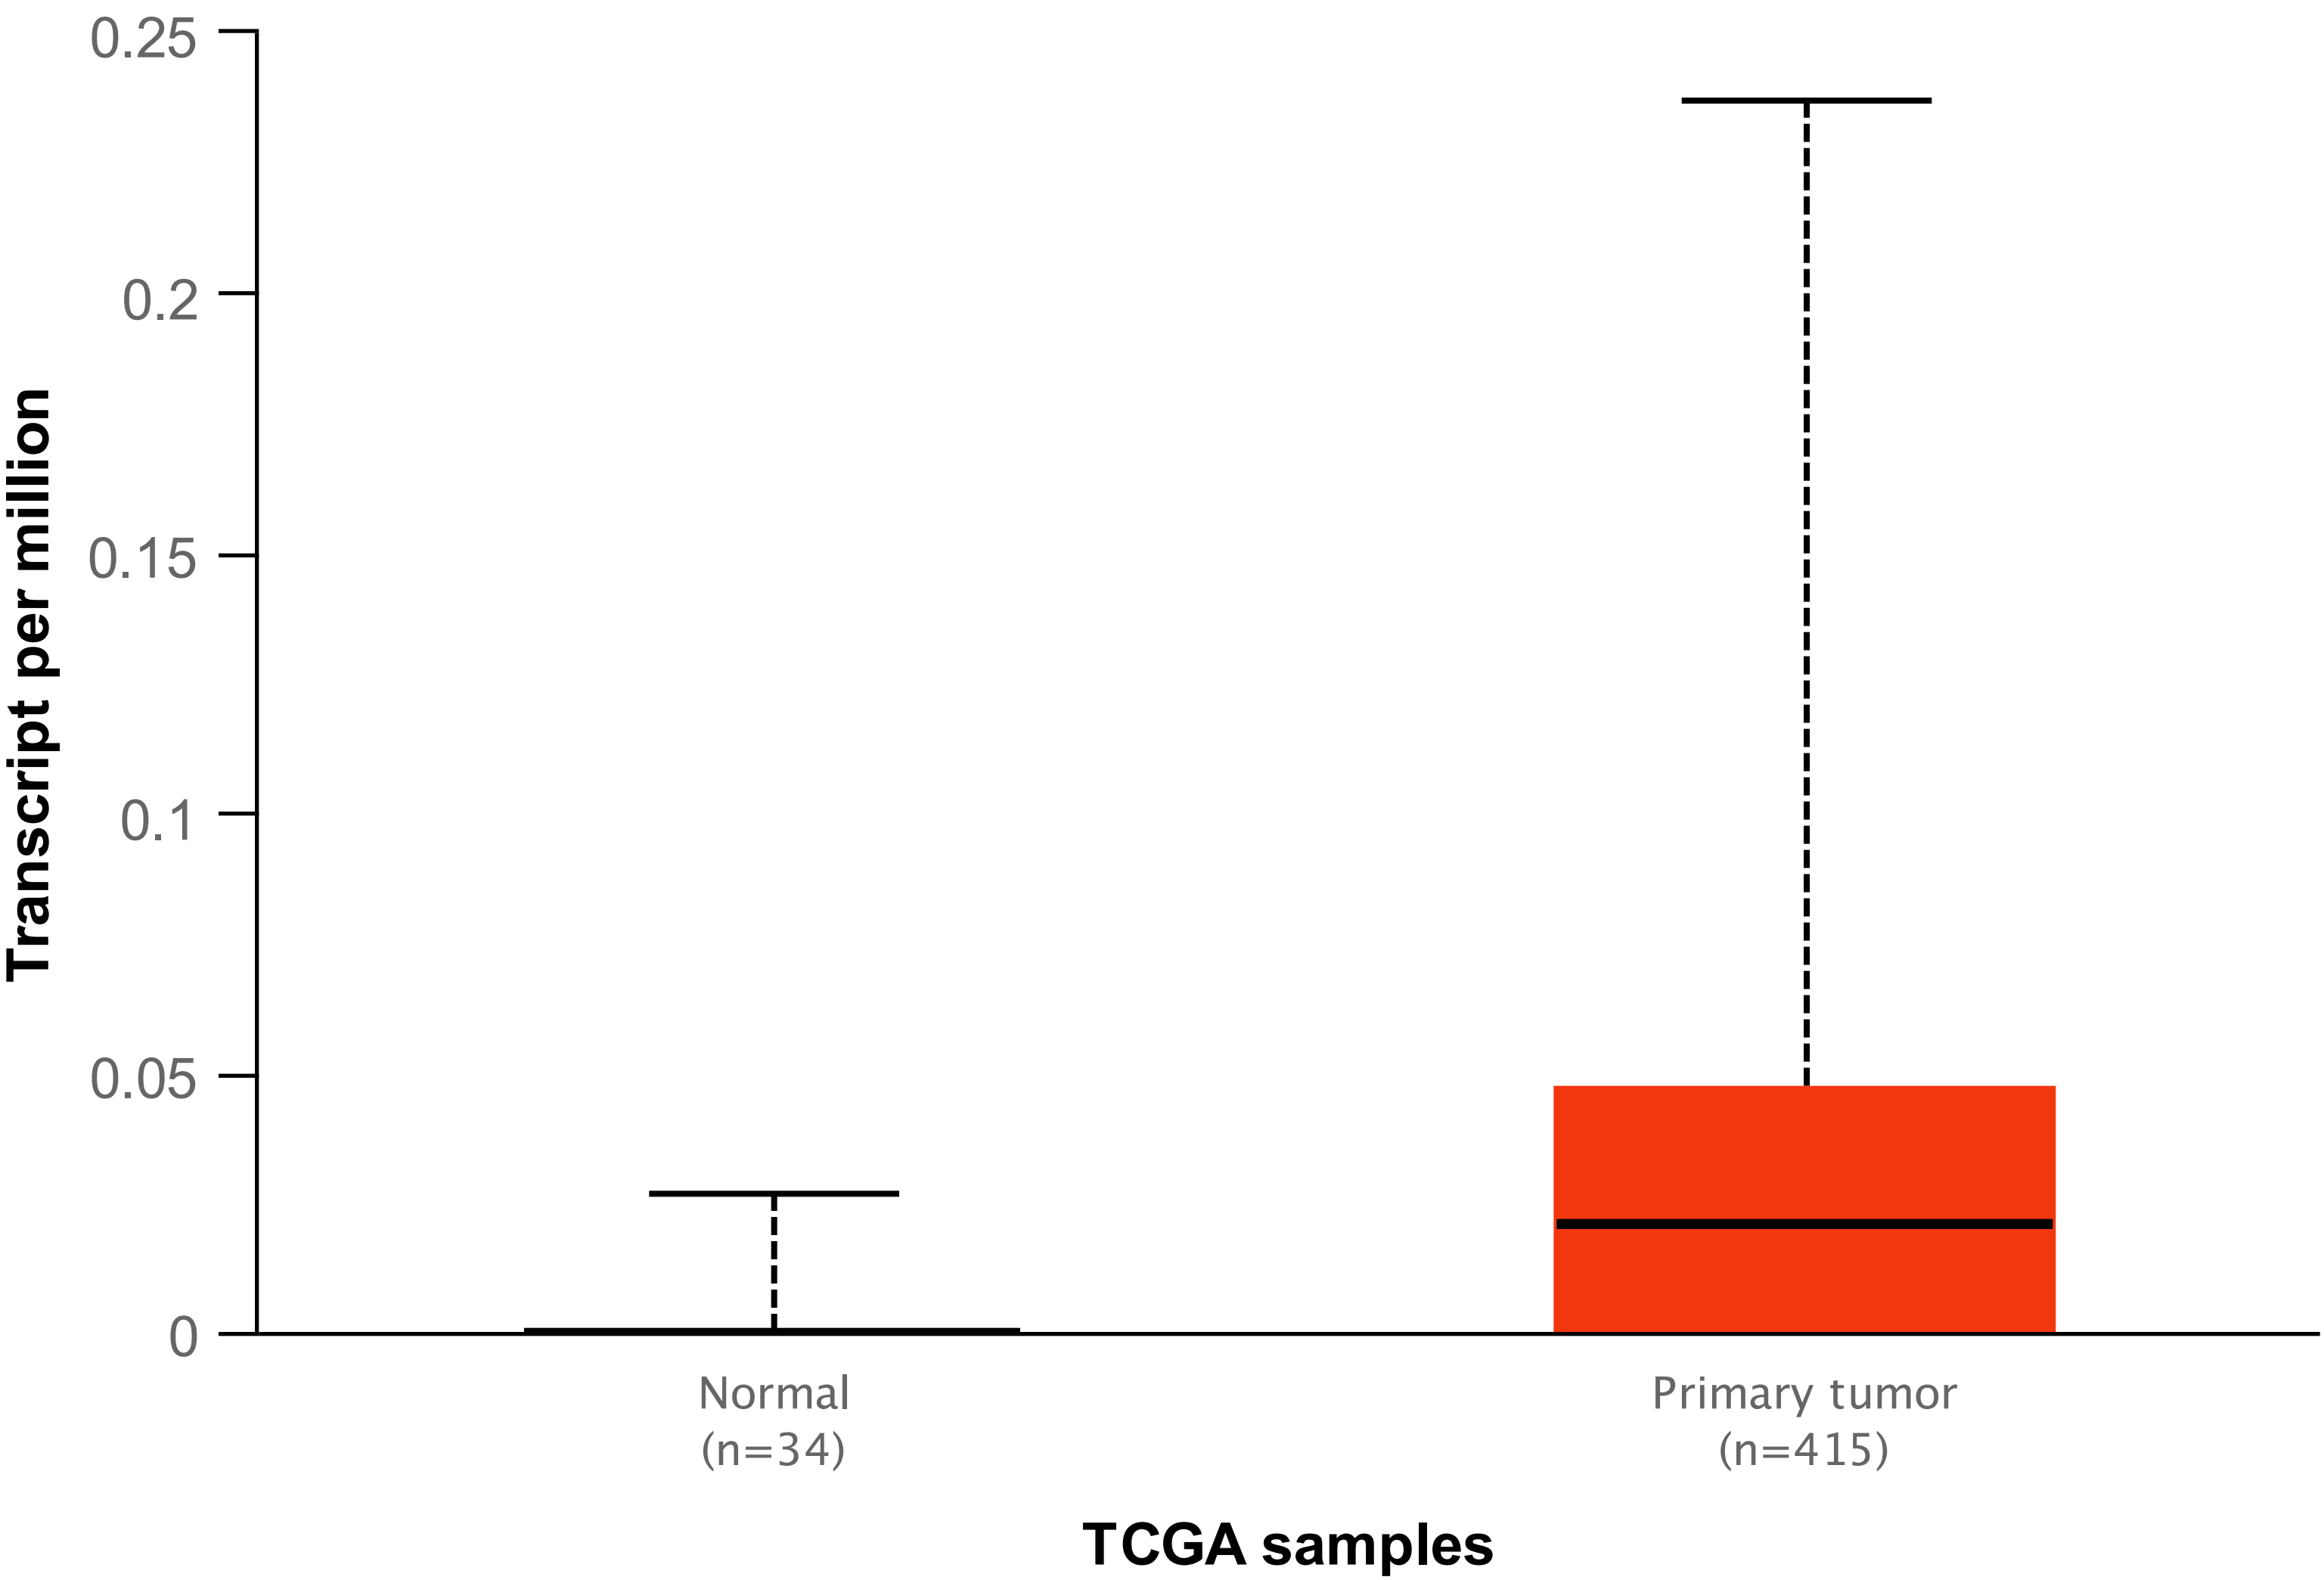

Supplement: Data_Sheet_2.ZIP [file Data_Sheet_2.ZIP]

# Expression of FAM83E in STAD based on Sample types

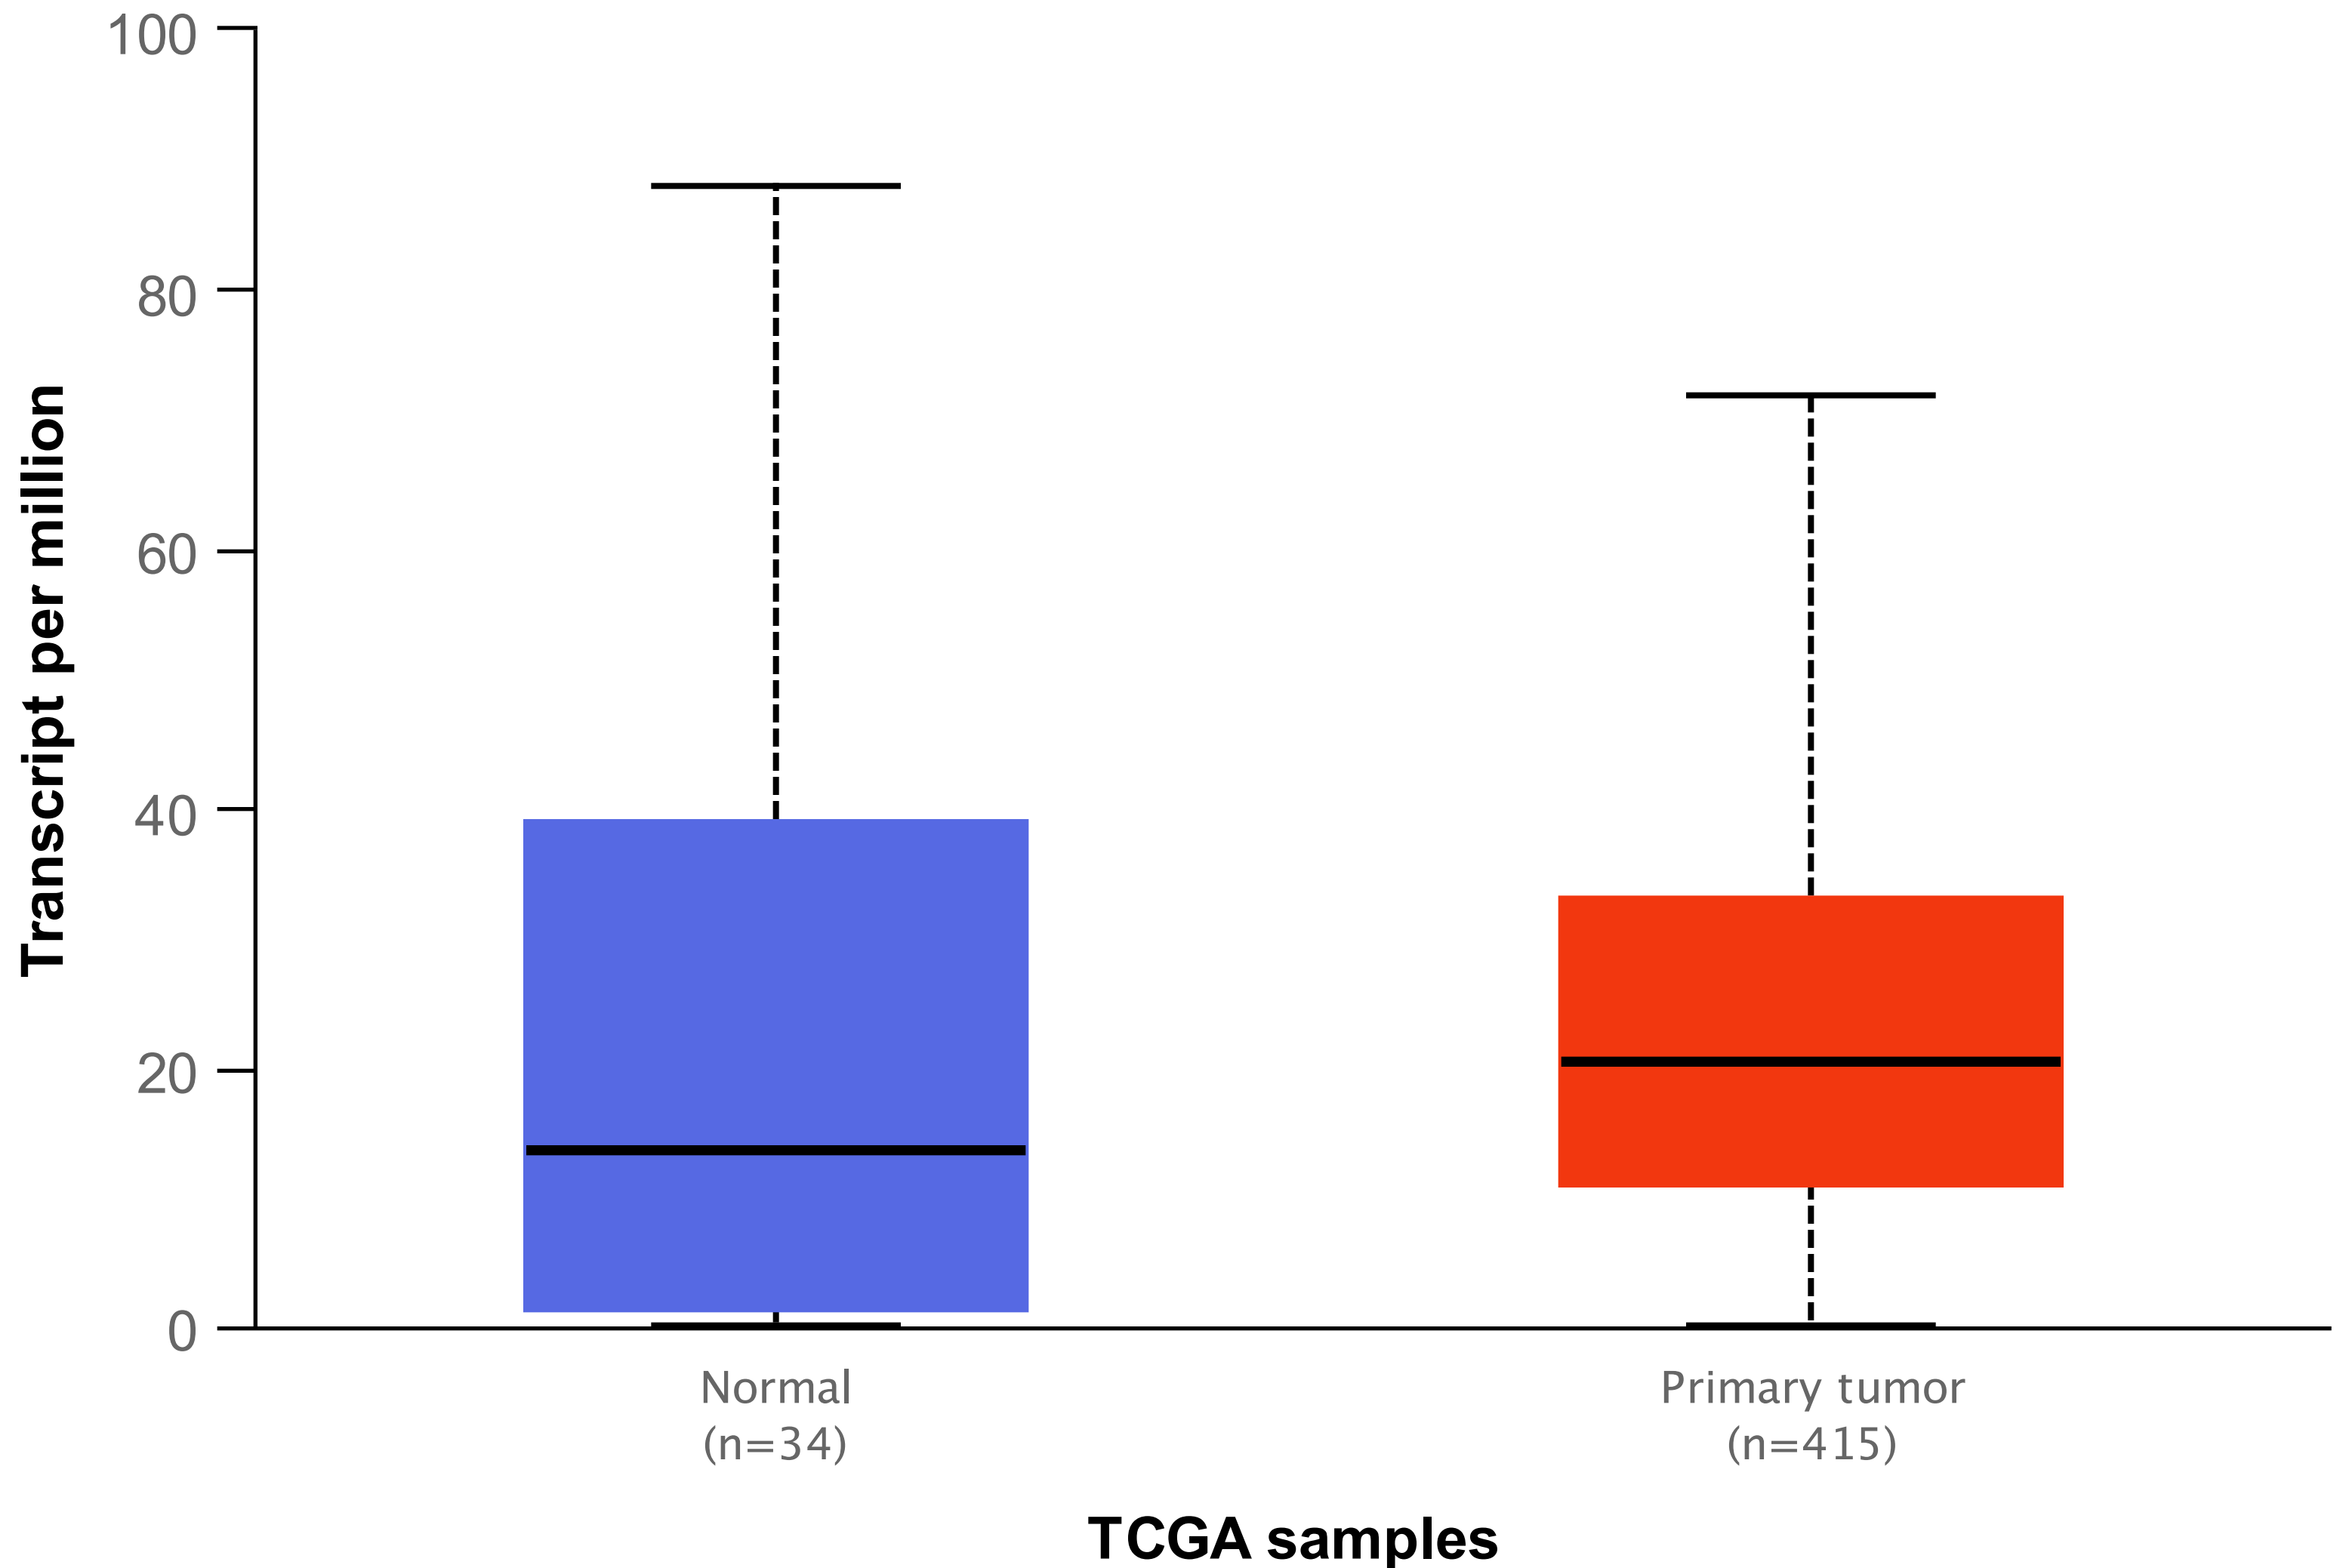

Supplement: Data_Sheet_2.ZIP [file Data_Sheet_2.ZIP]

# Expression of FAM83H in STAD based on Sample types

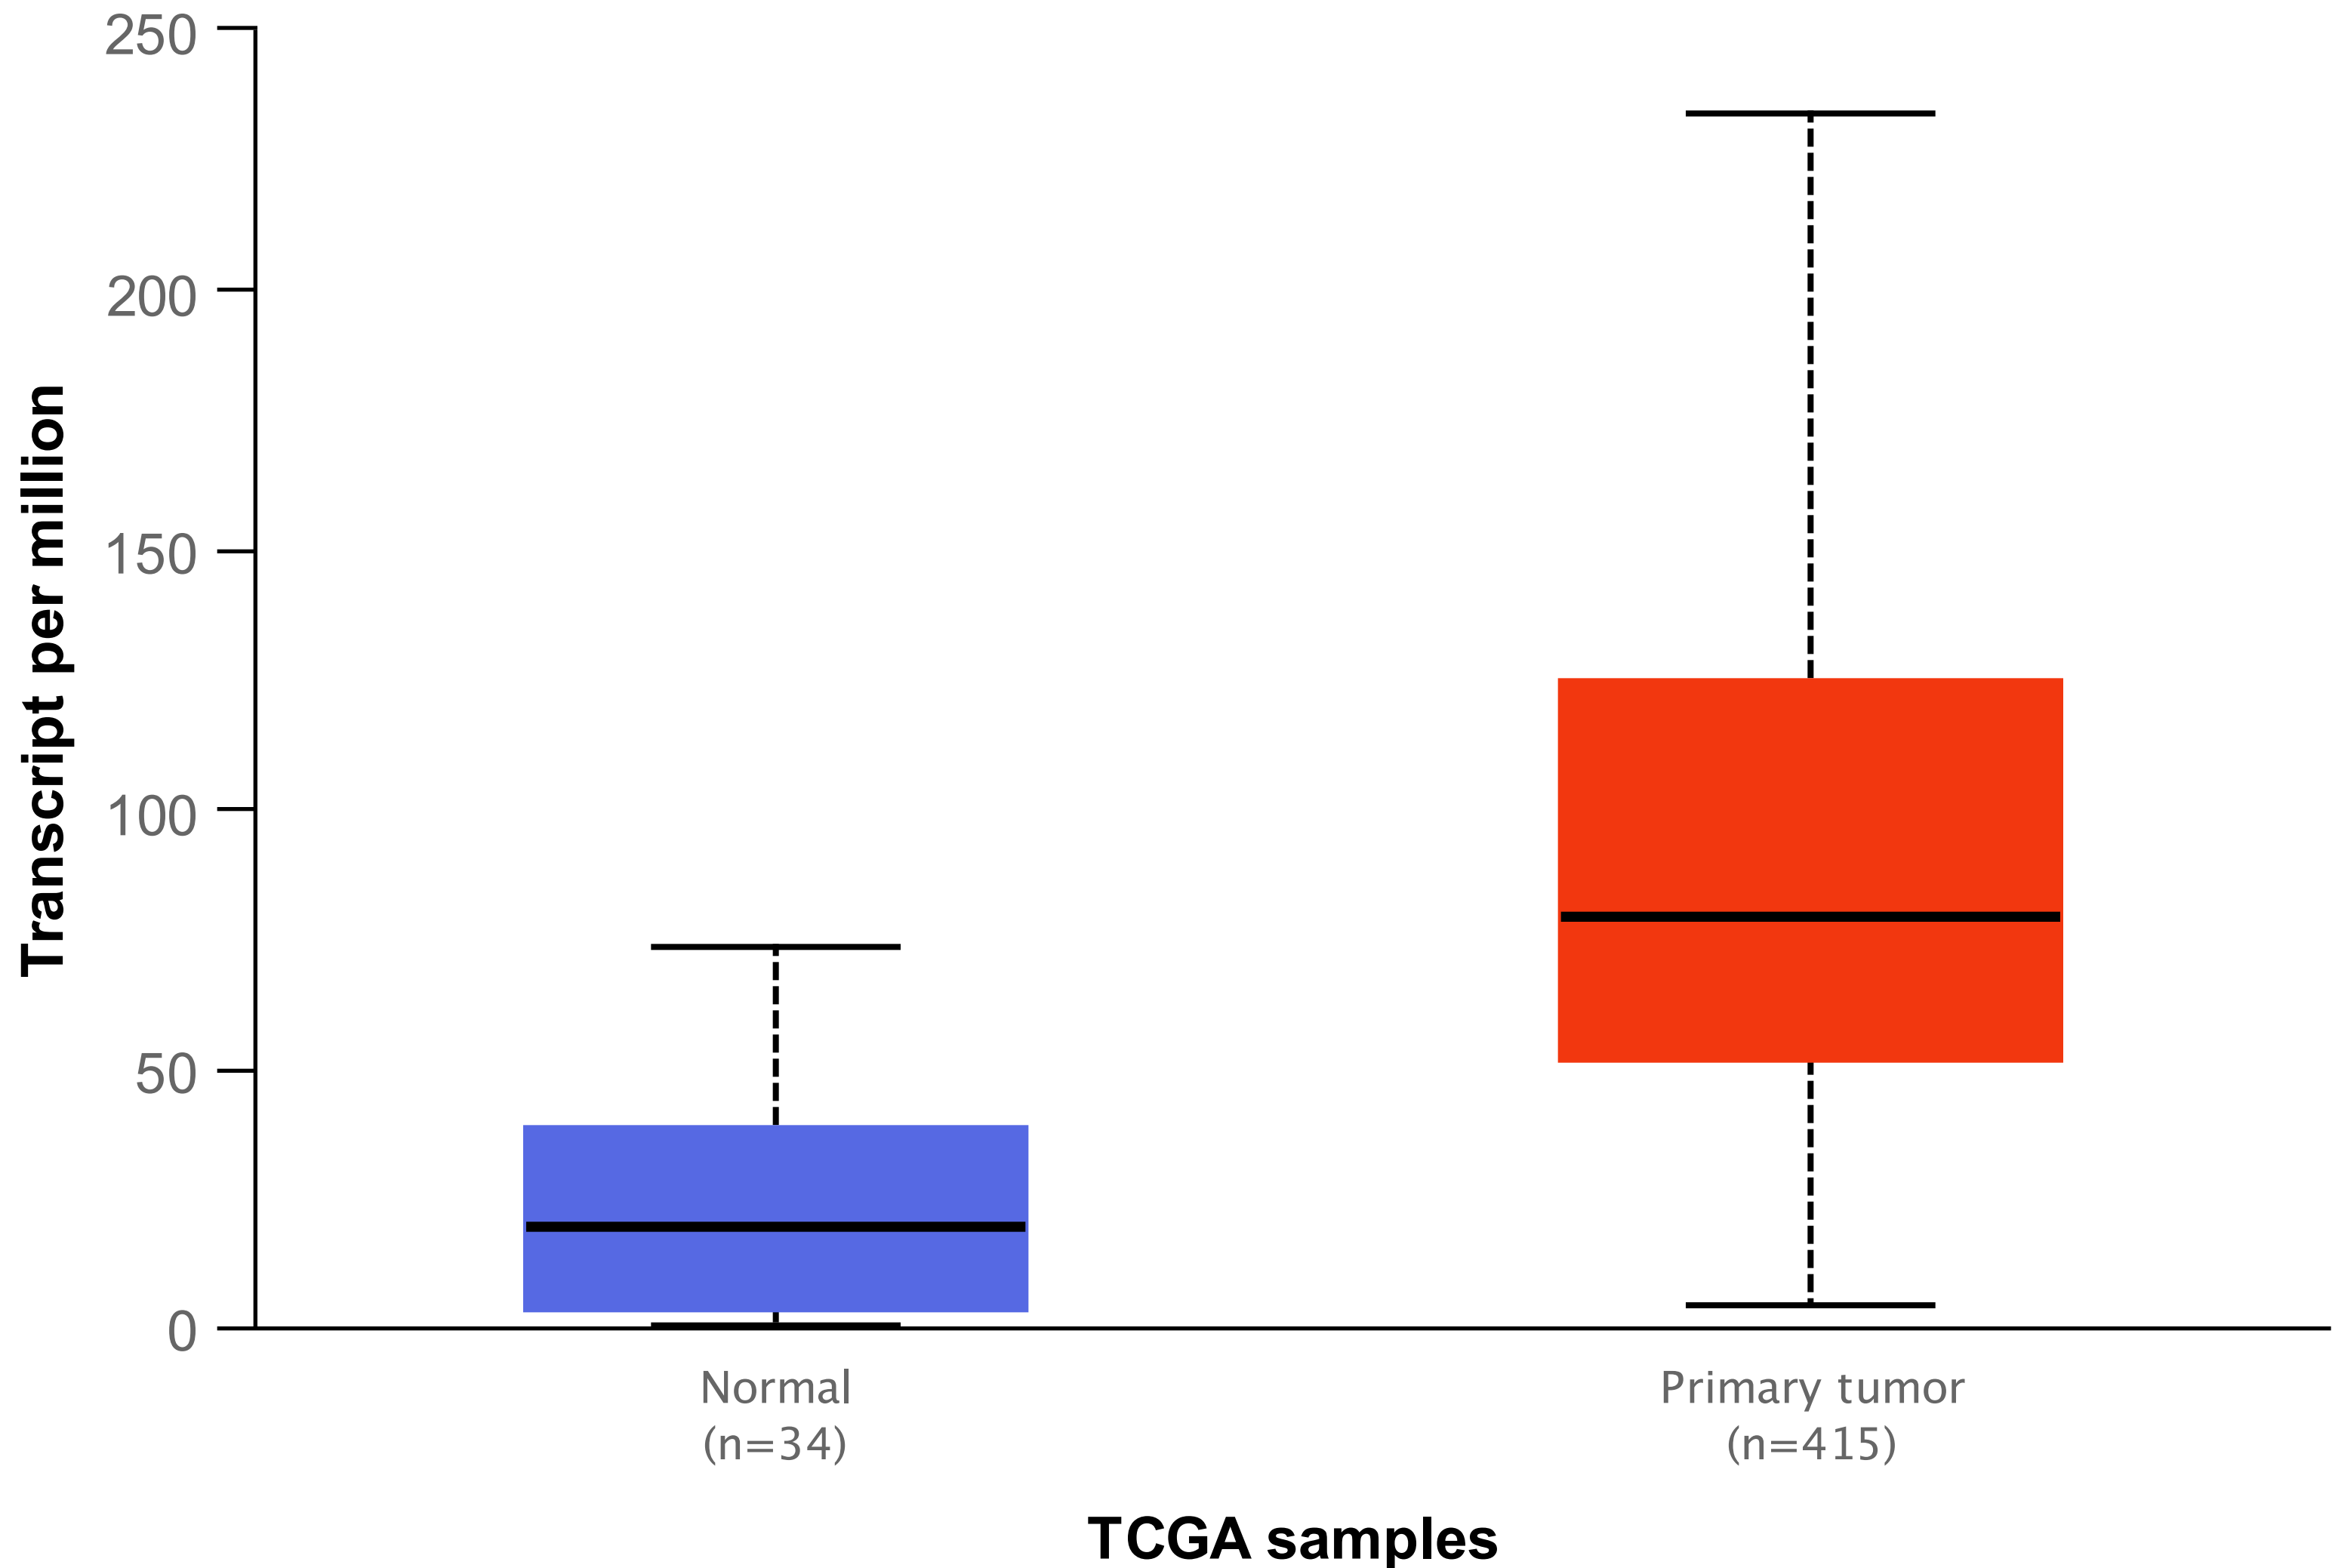

Supplement: Data_Sheet_2.ZIP [file Data_Sheet_2.ZIP]

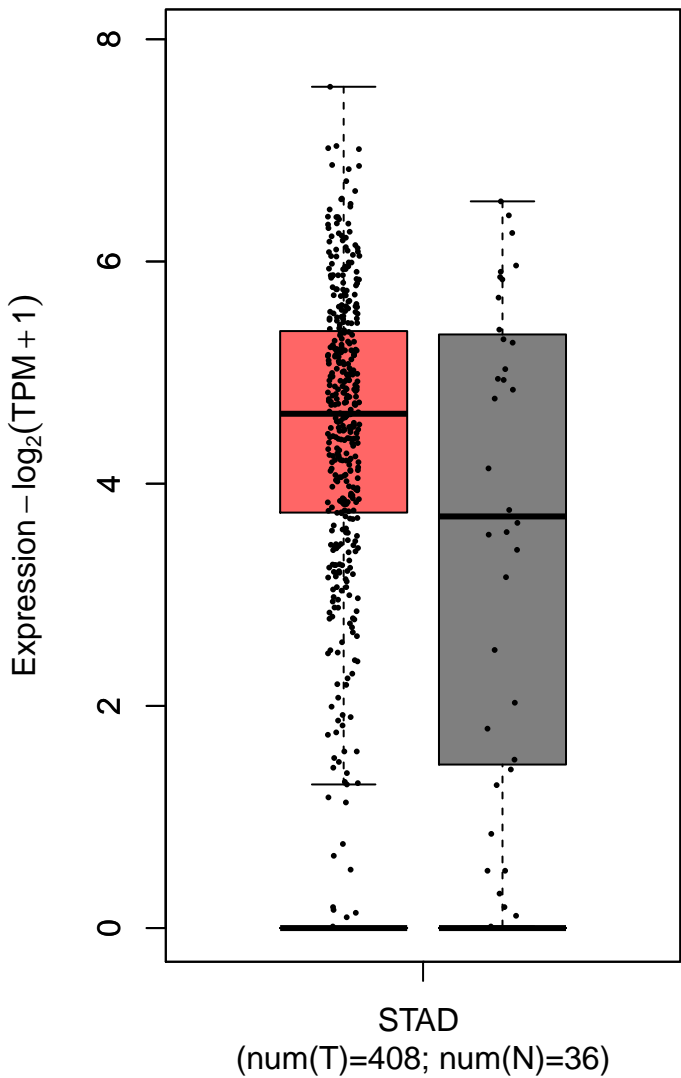

Supplement: Data_Sheet_2.ZIP [file Data_Sheet_2.ZIP]

# Expression of FAM83D in STAD based on individual cancer stages

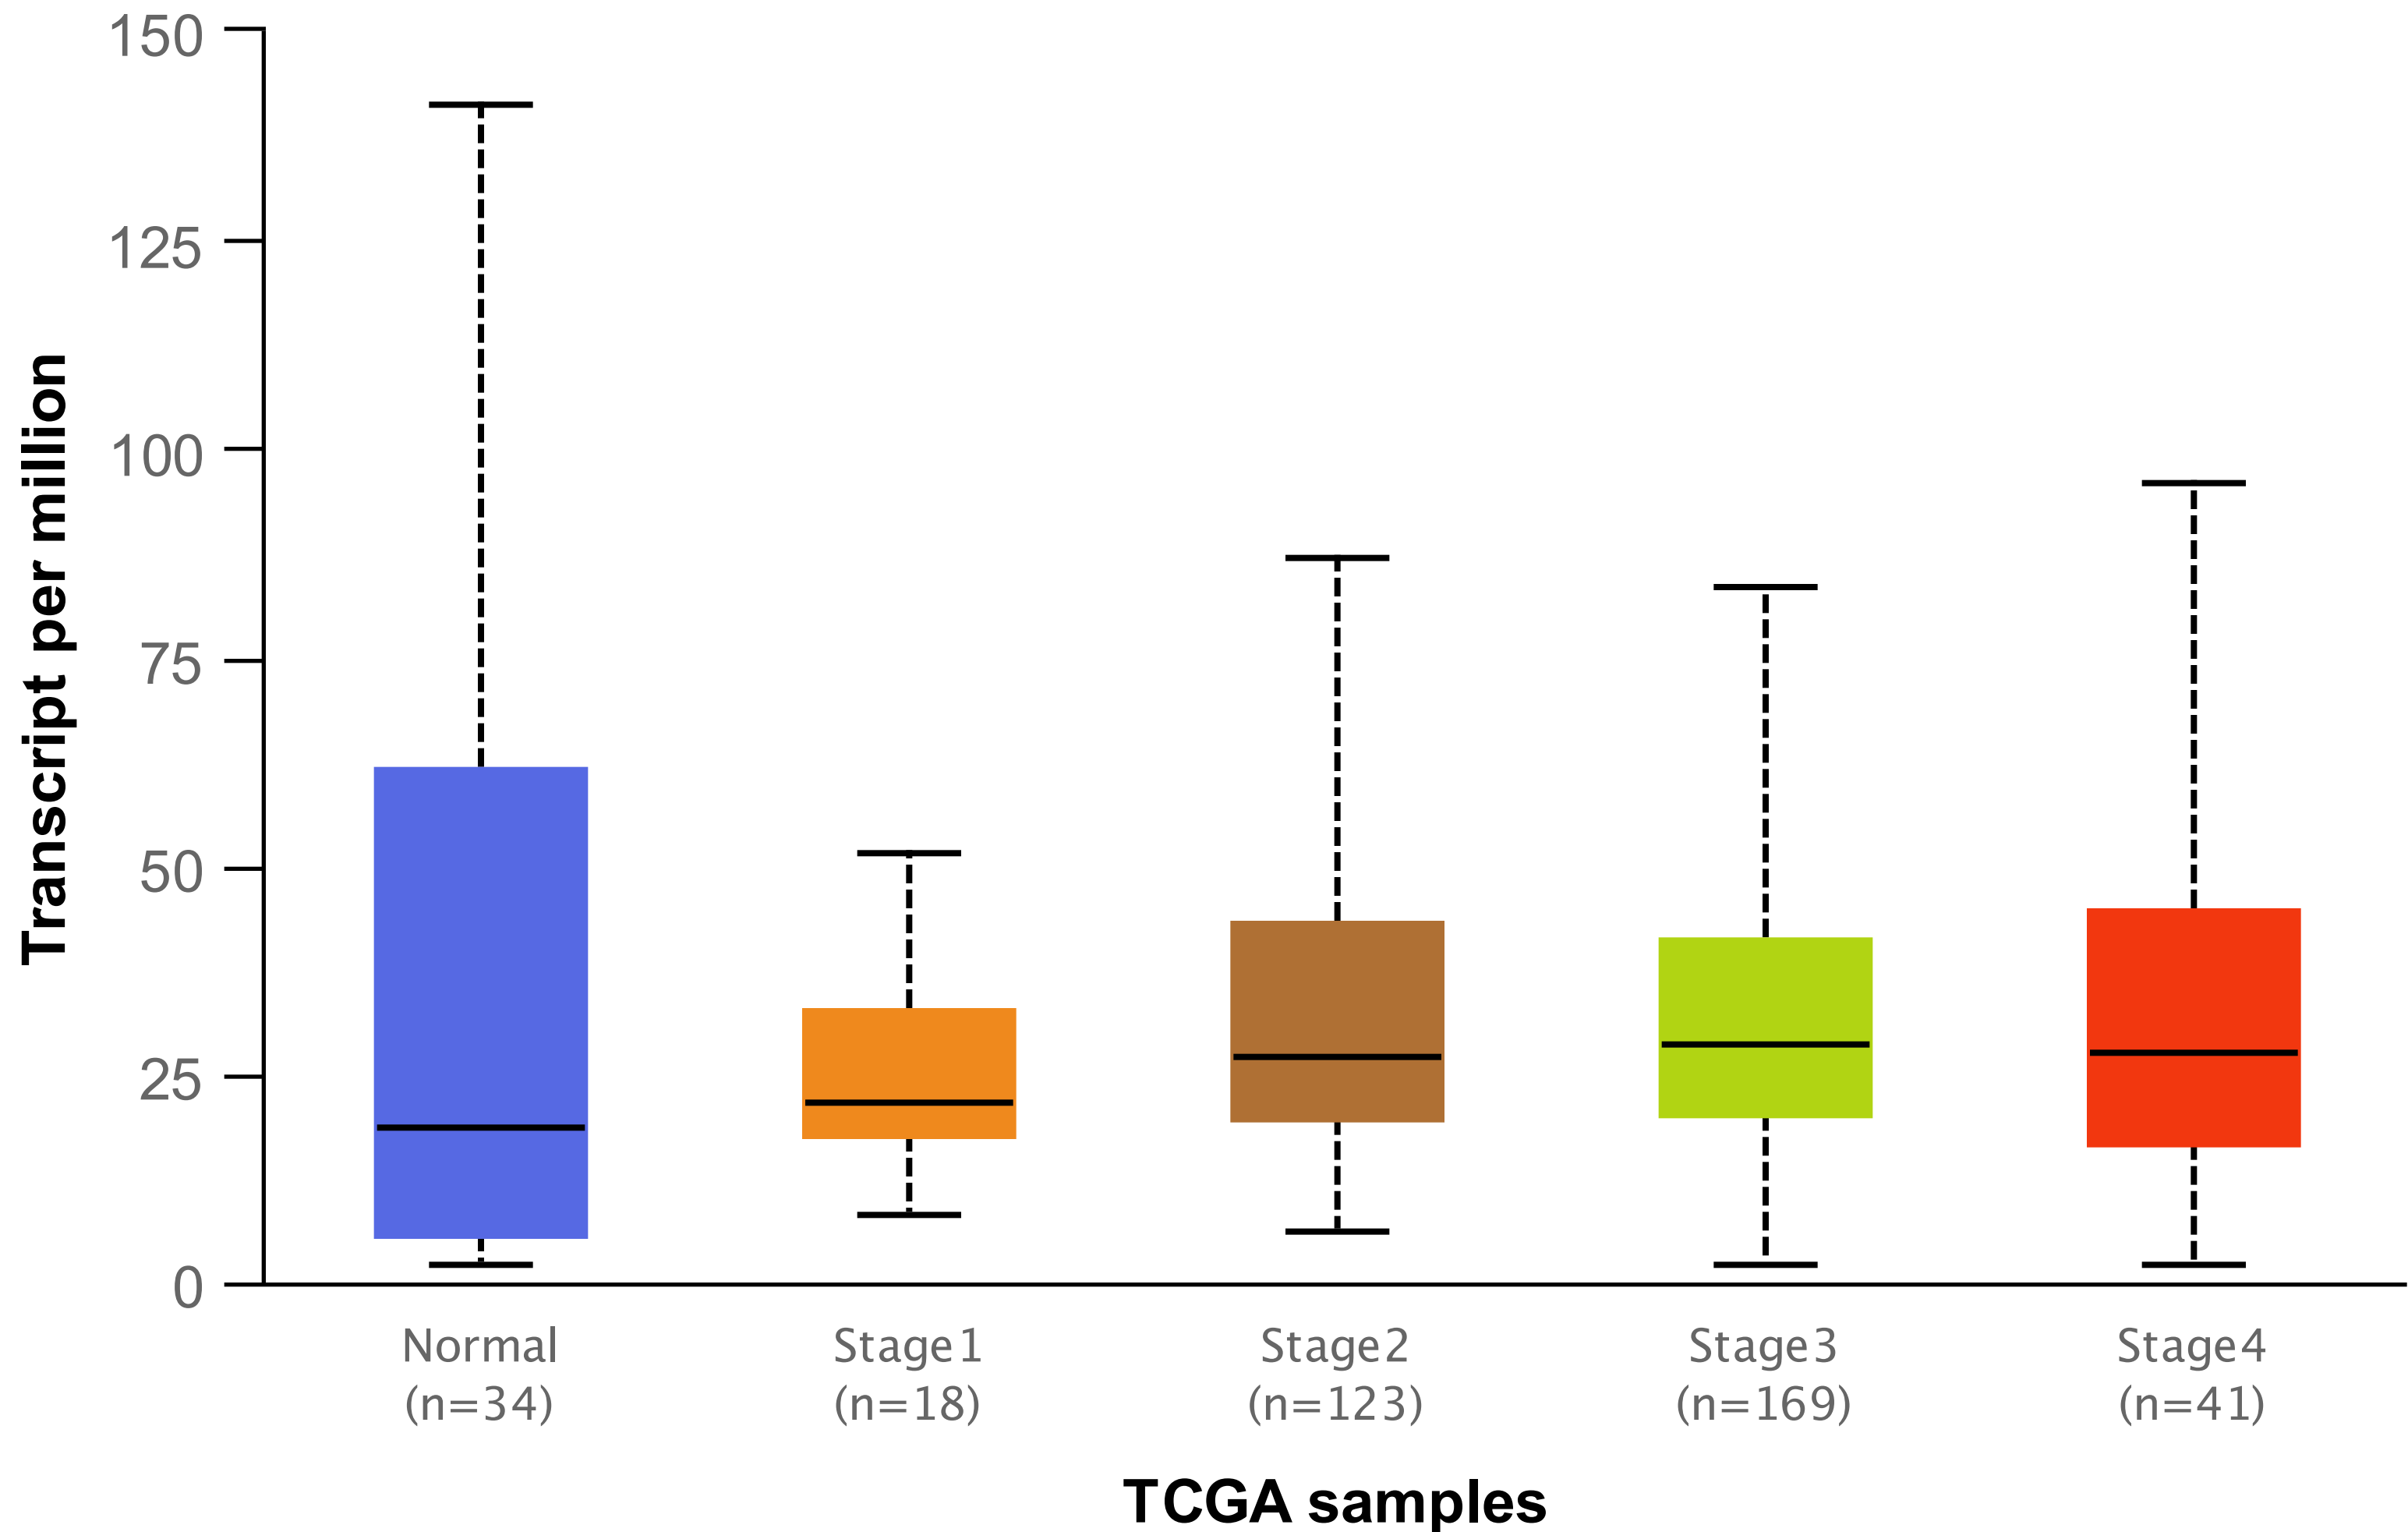

Supplement: Data_Sheet_5.ZIP [file Data_Sheet_5.ZIP]

# Expression of FAM83G in STAD based on individual cancer stages

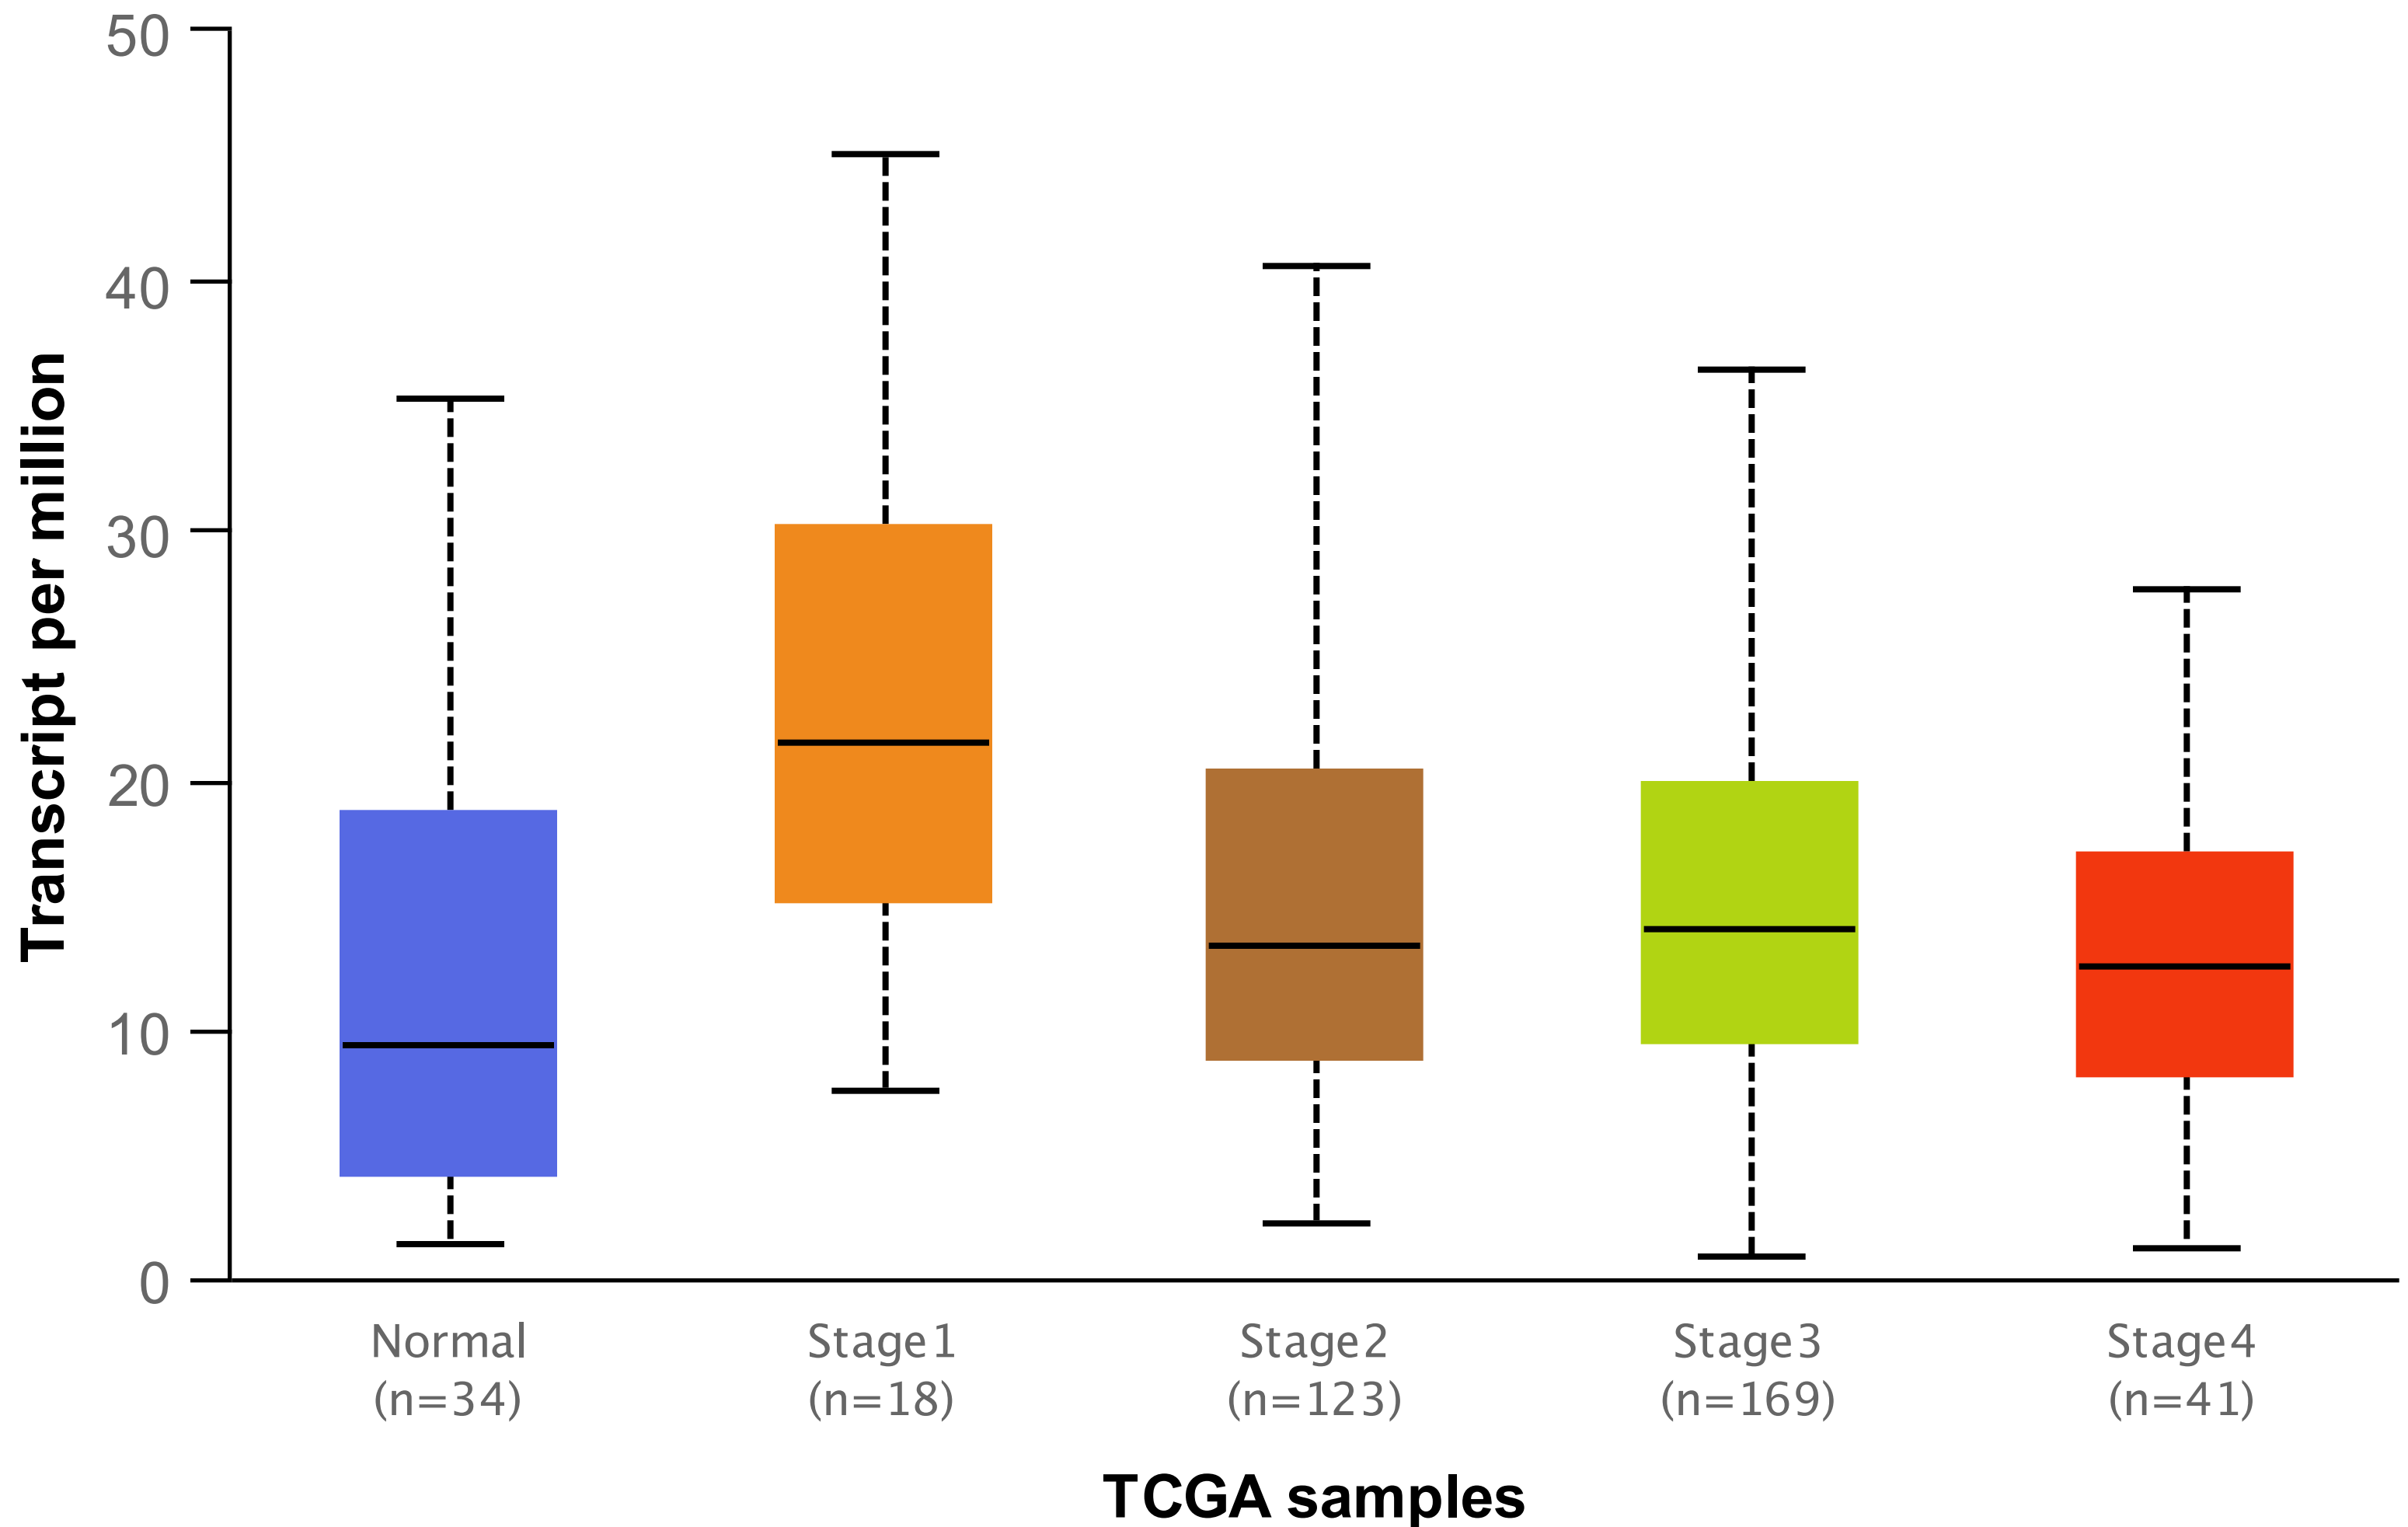

Supplement: Data_Sheet_5.ZIP [file Data_Sheet_5.ZIP]

# Expression of FAM83C in STAD based on individual cancer stages

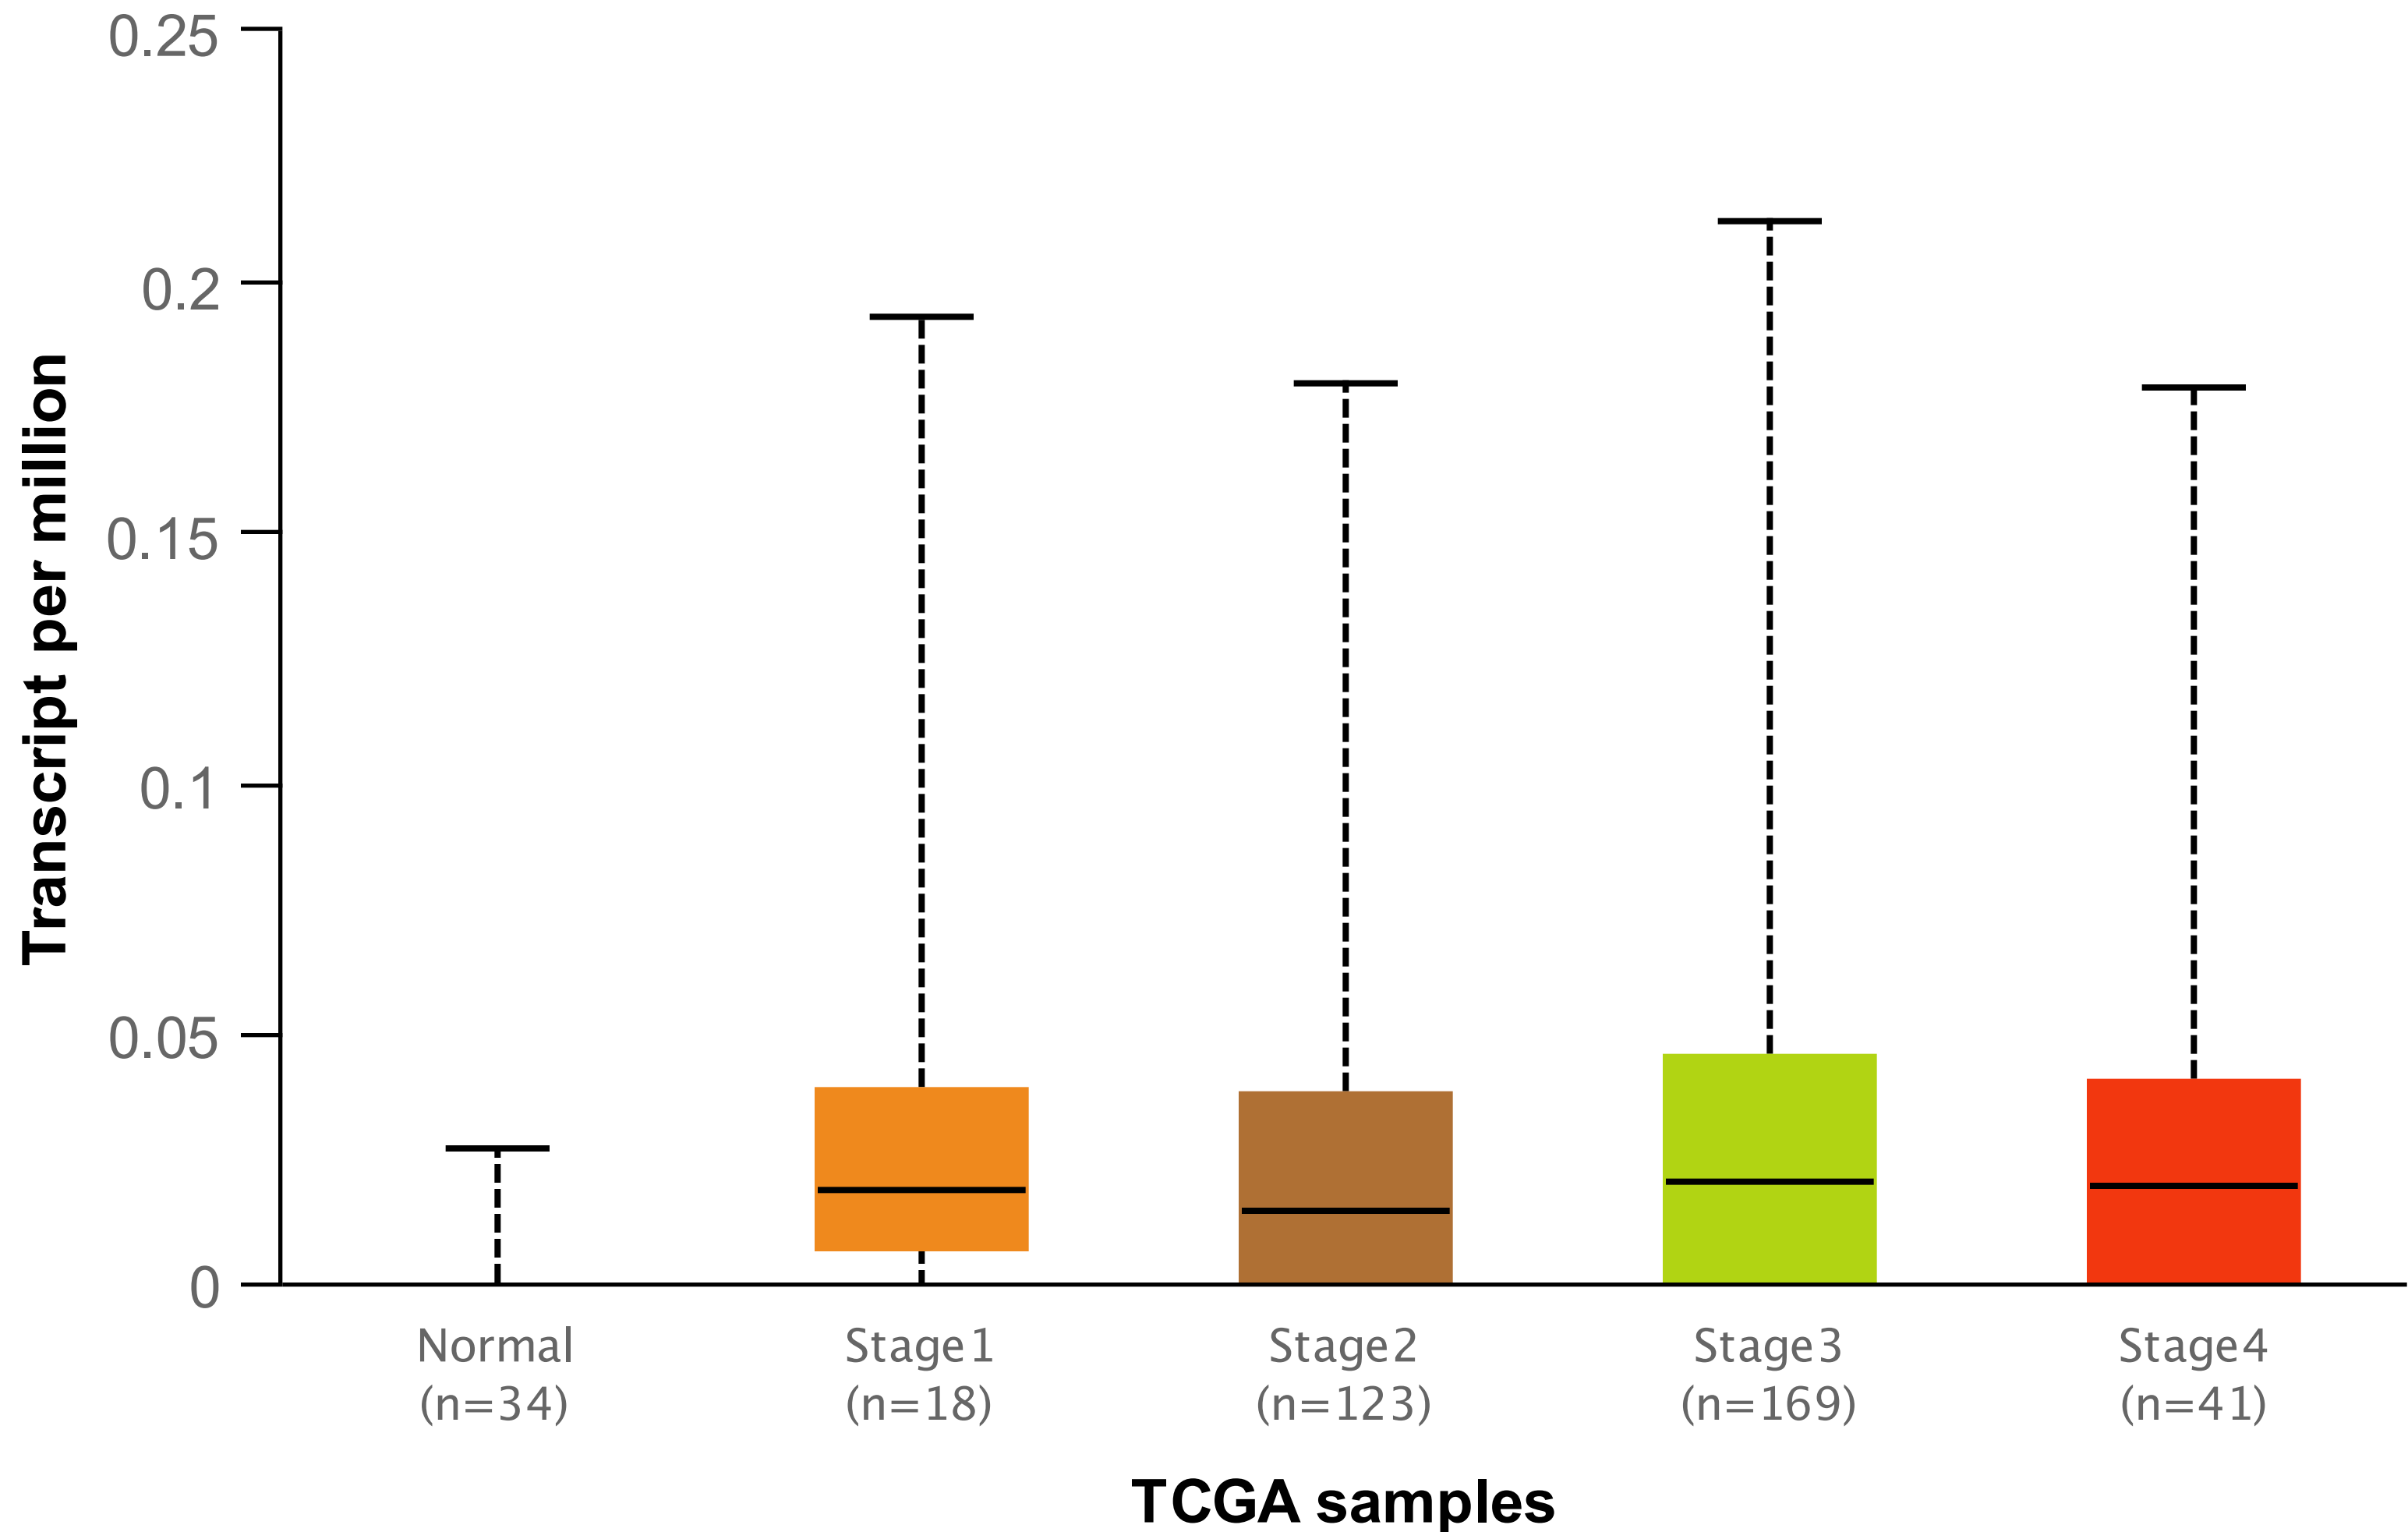

Supplement: Data_Sheet_5.ZIP [file Data_Sheet_5.ZIP]

# Expression of FAM83B in STAD based on individual cancer stages

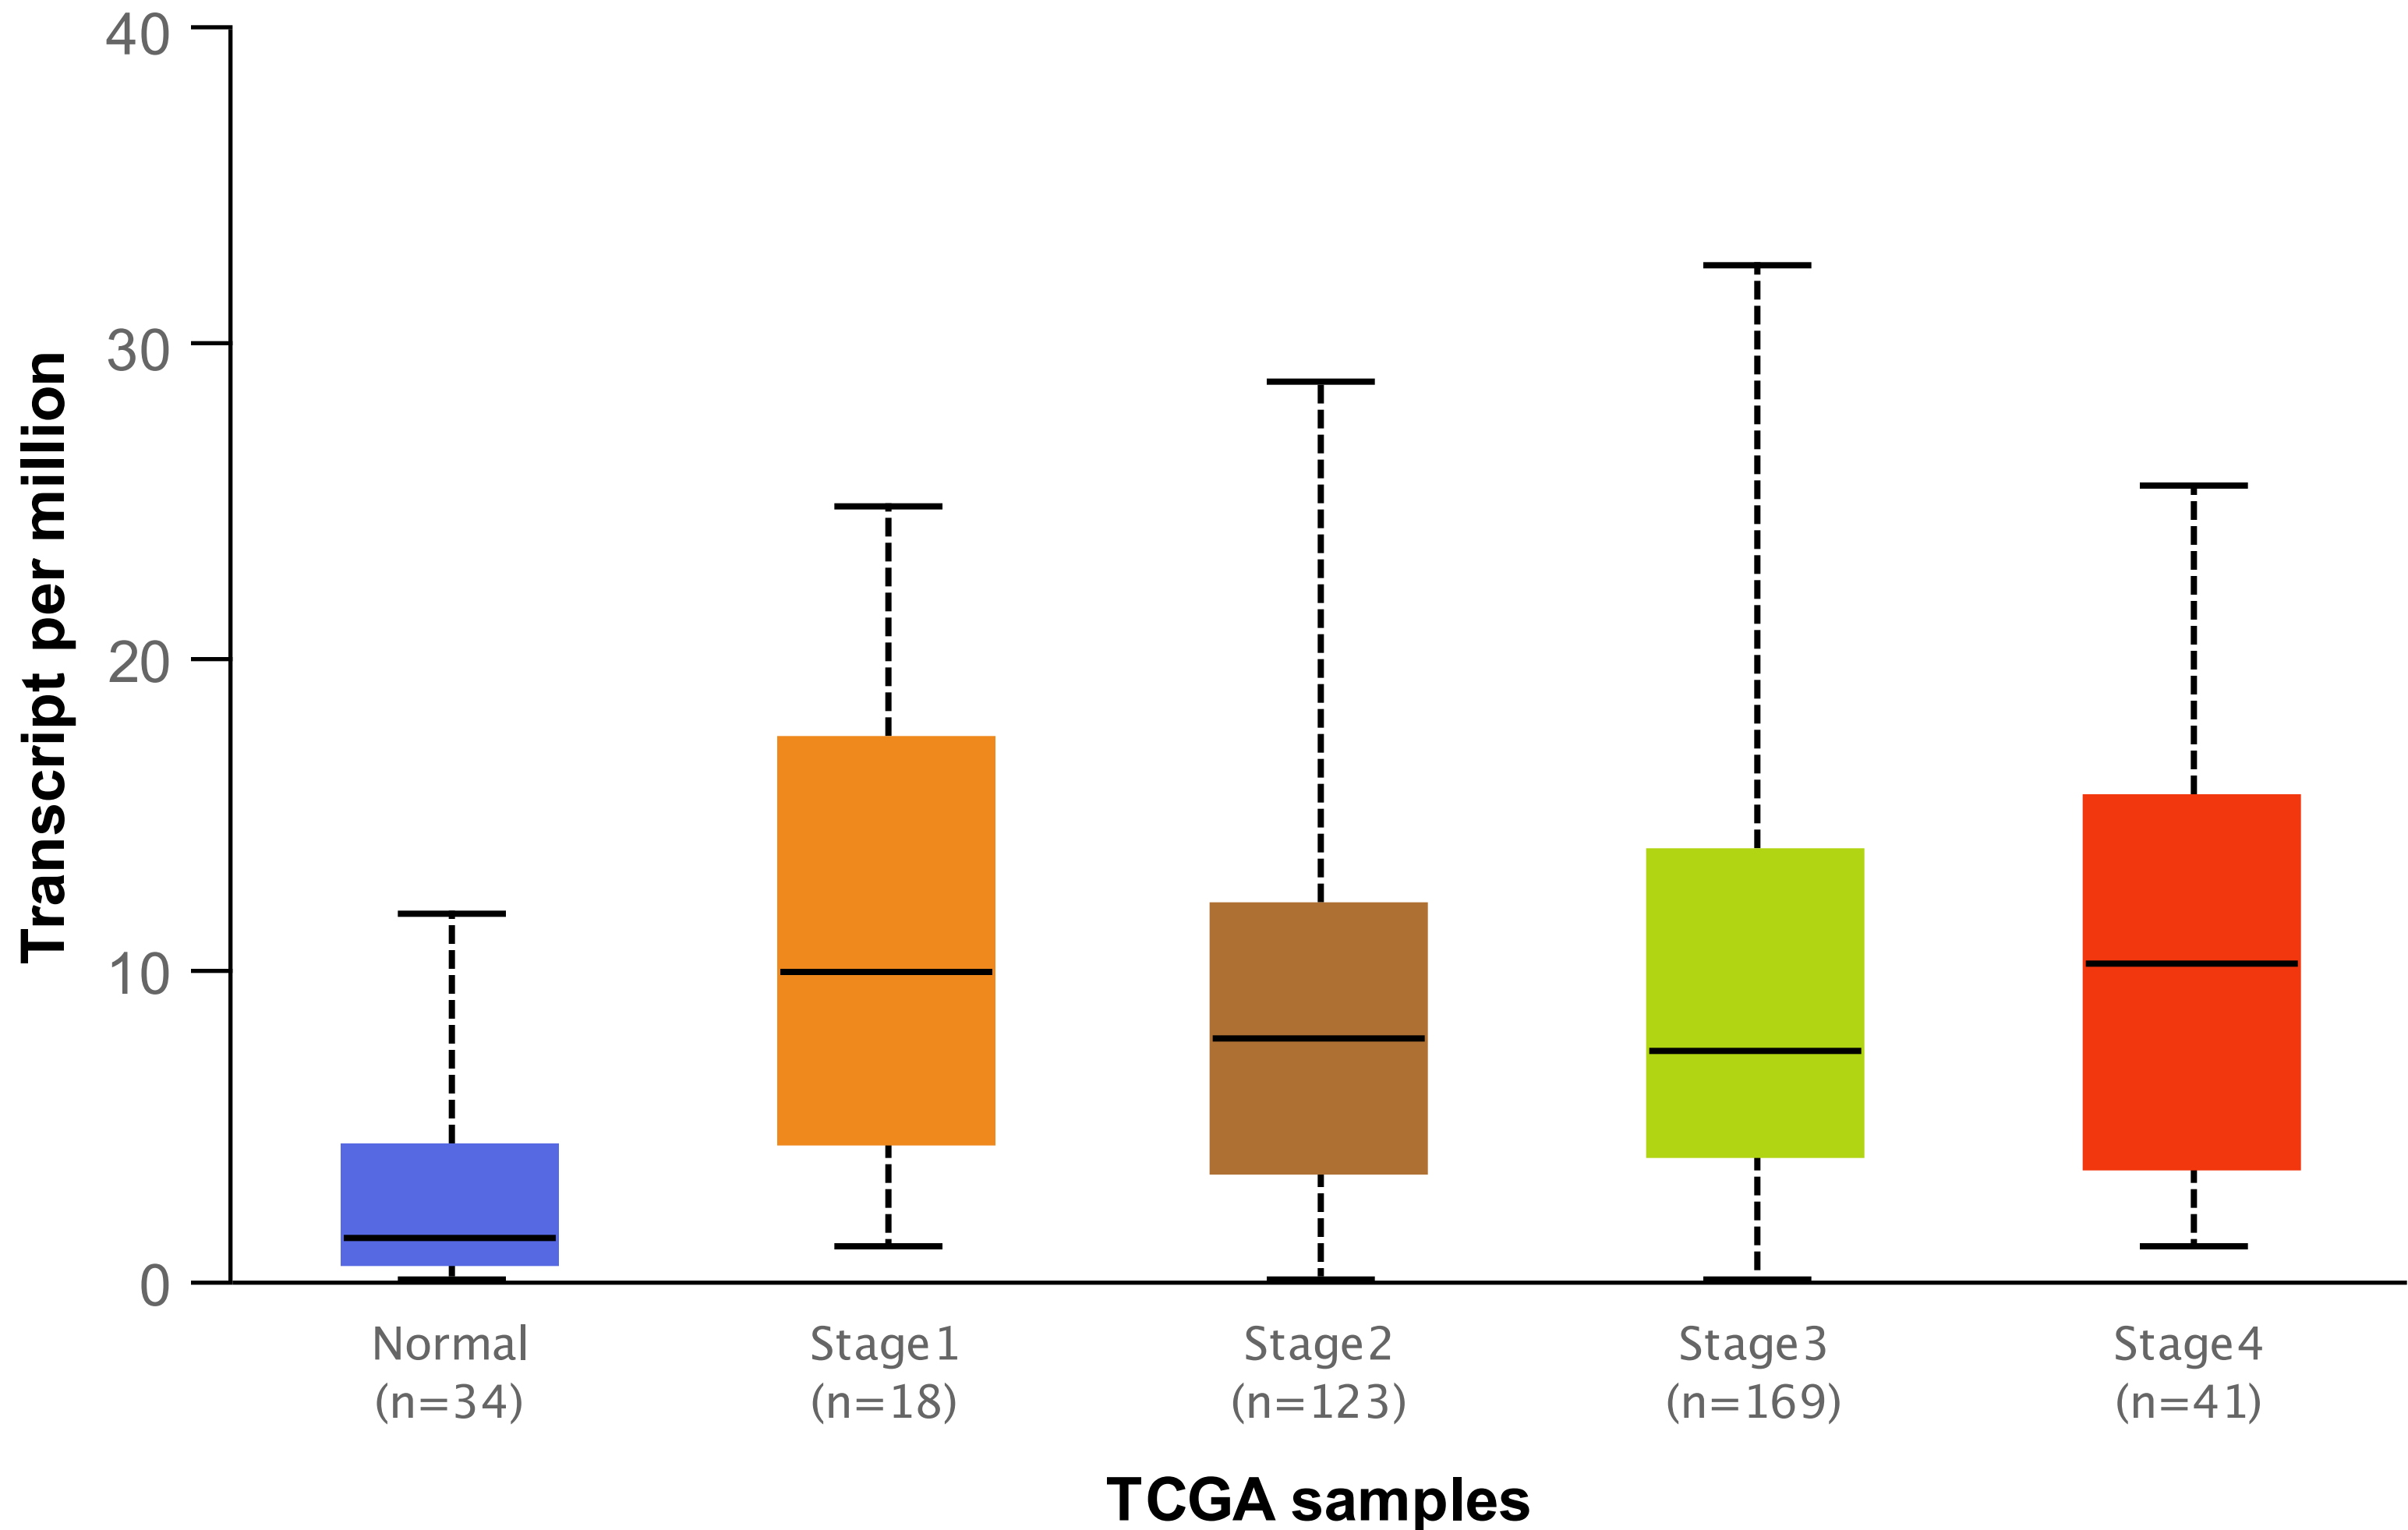

Supplement: Data_Sheet_5.ZIP [file Data_Sheet_5.ZIP]

# Expression of FAM83E in STAD based on individual cancer stages

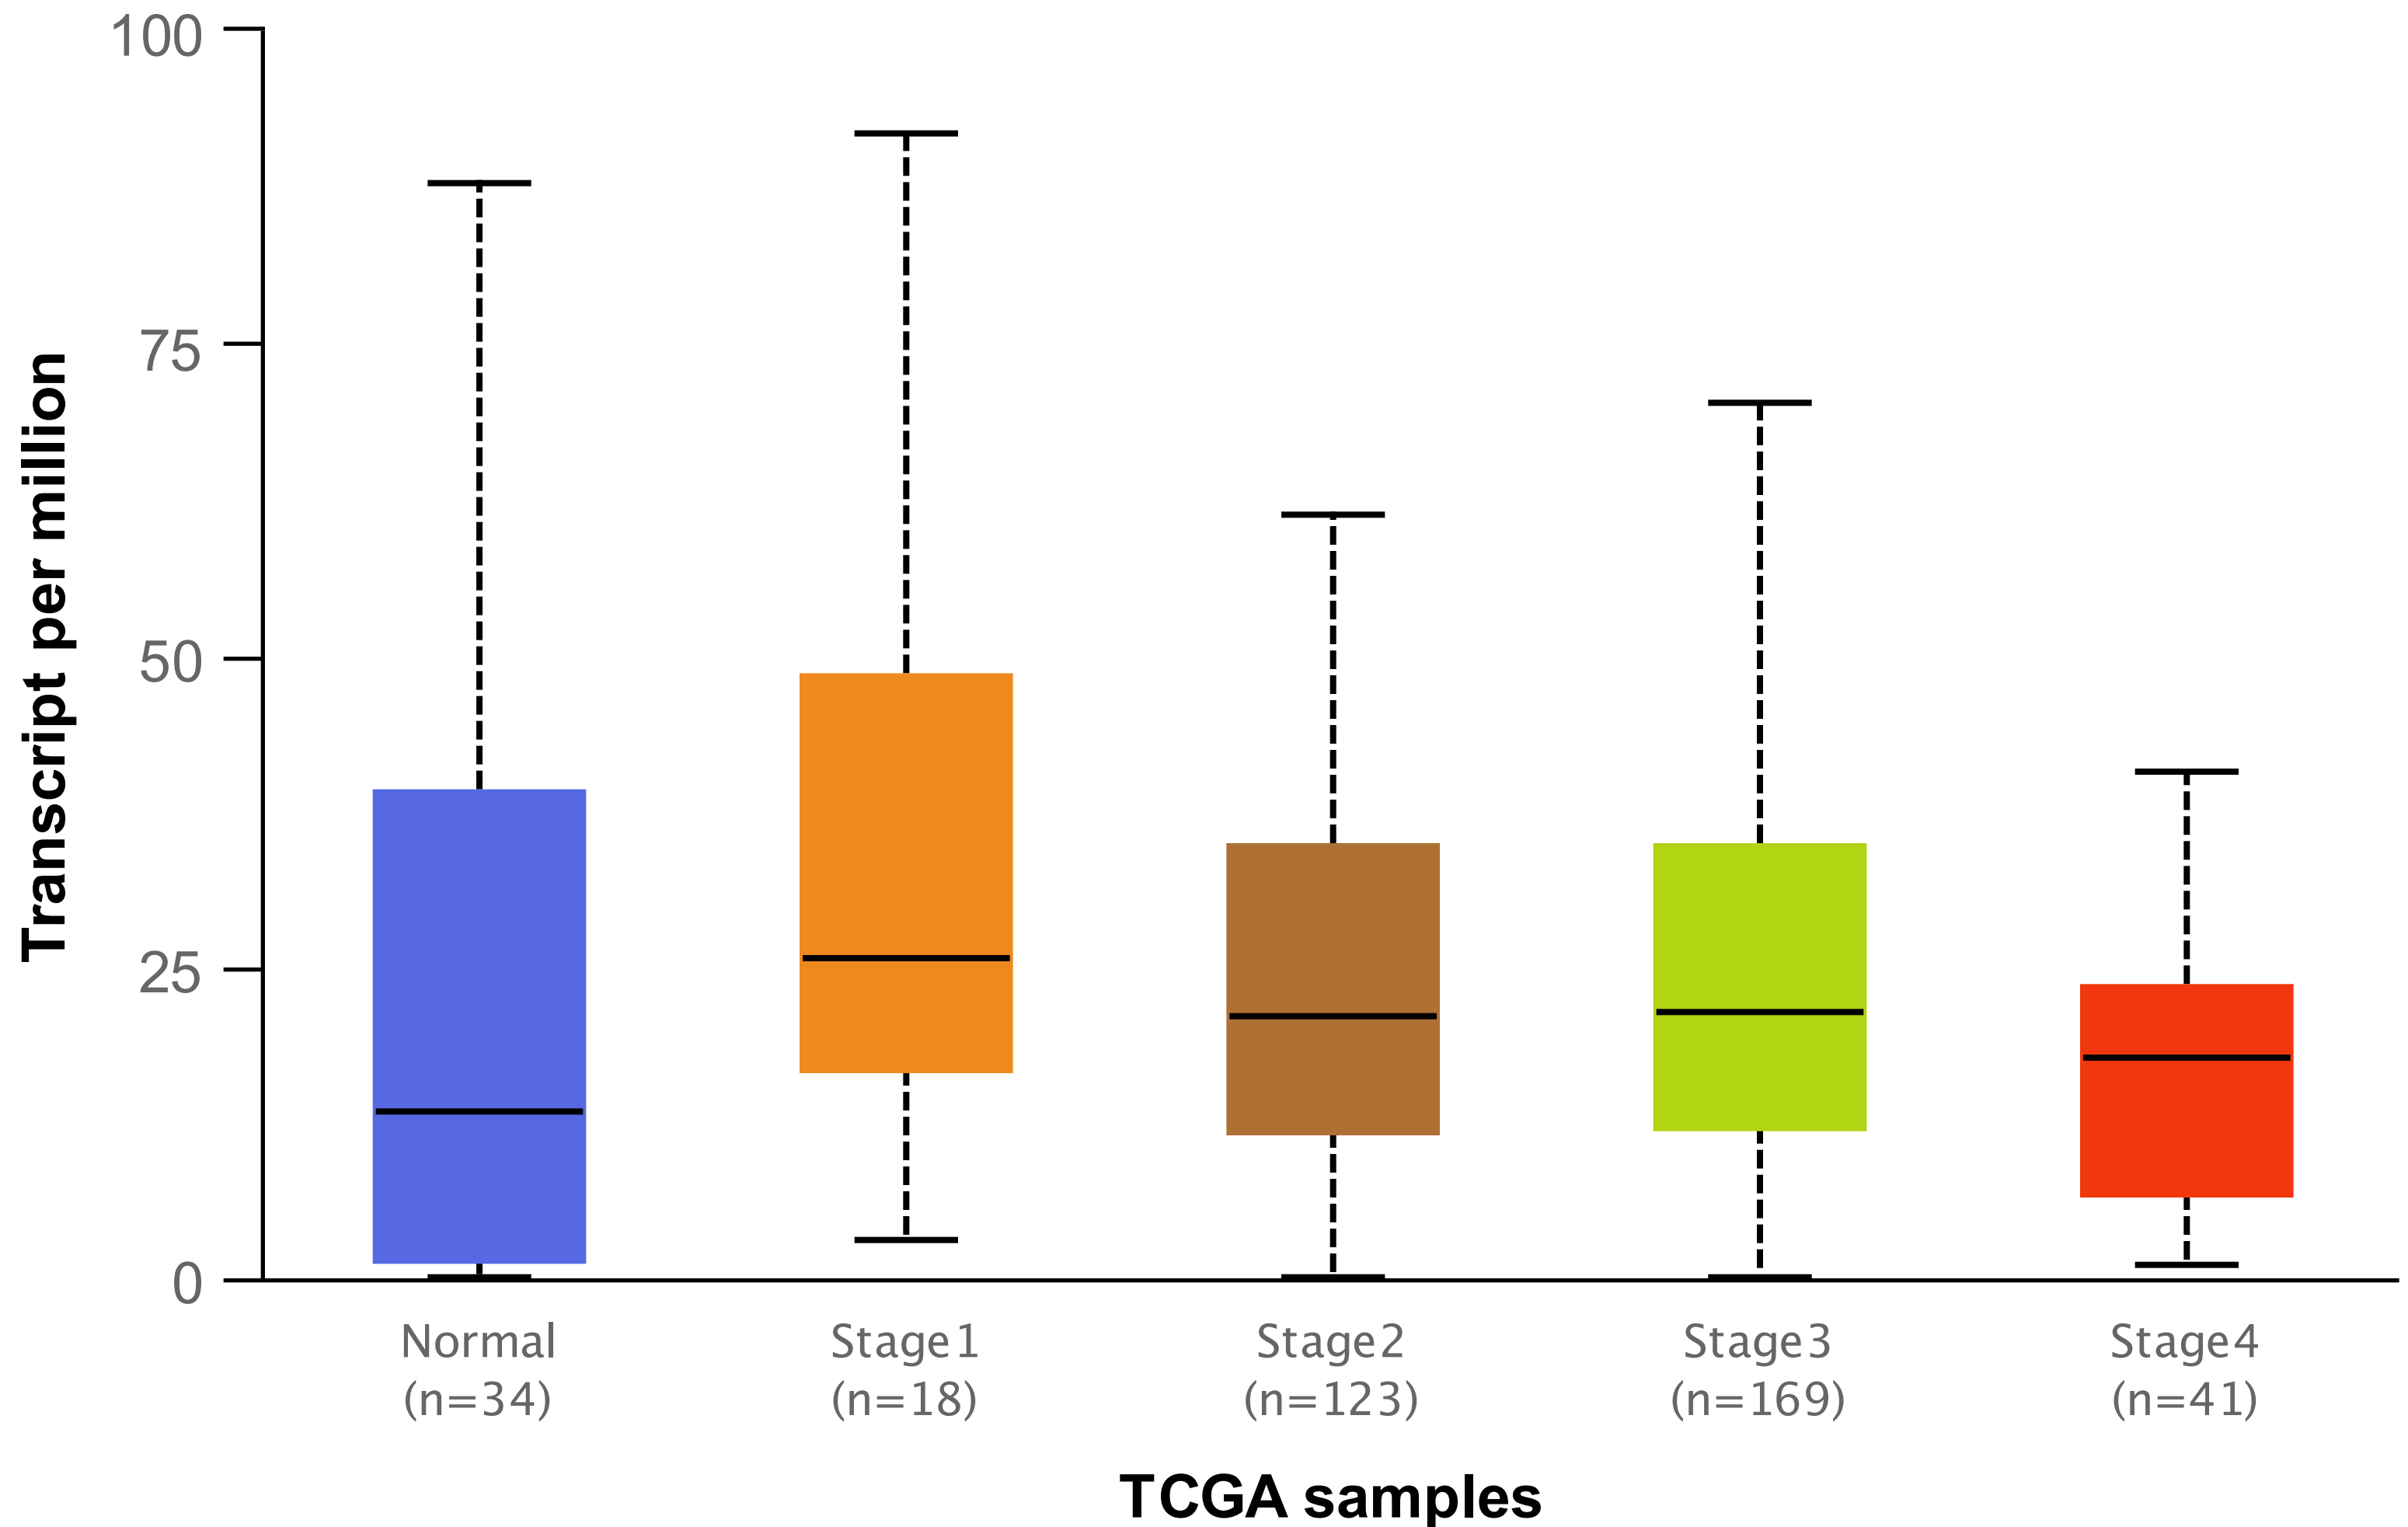

Supplement: Data_Sheet_5.ZIP [file Data_Sheet_5.ZIP]

# Expression of FAM83A in STAD based on individual cancer stages

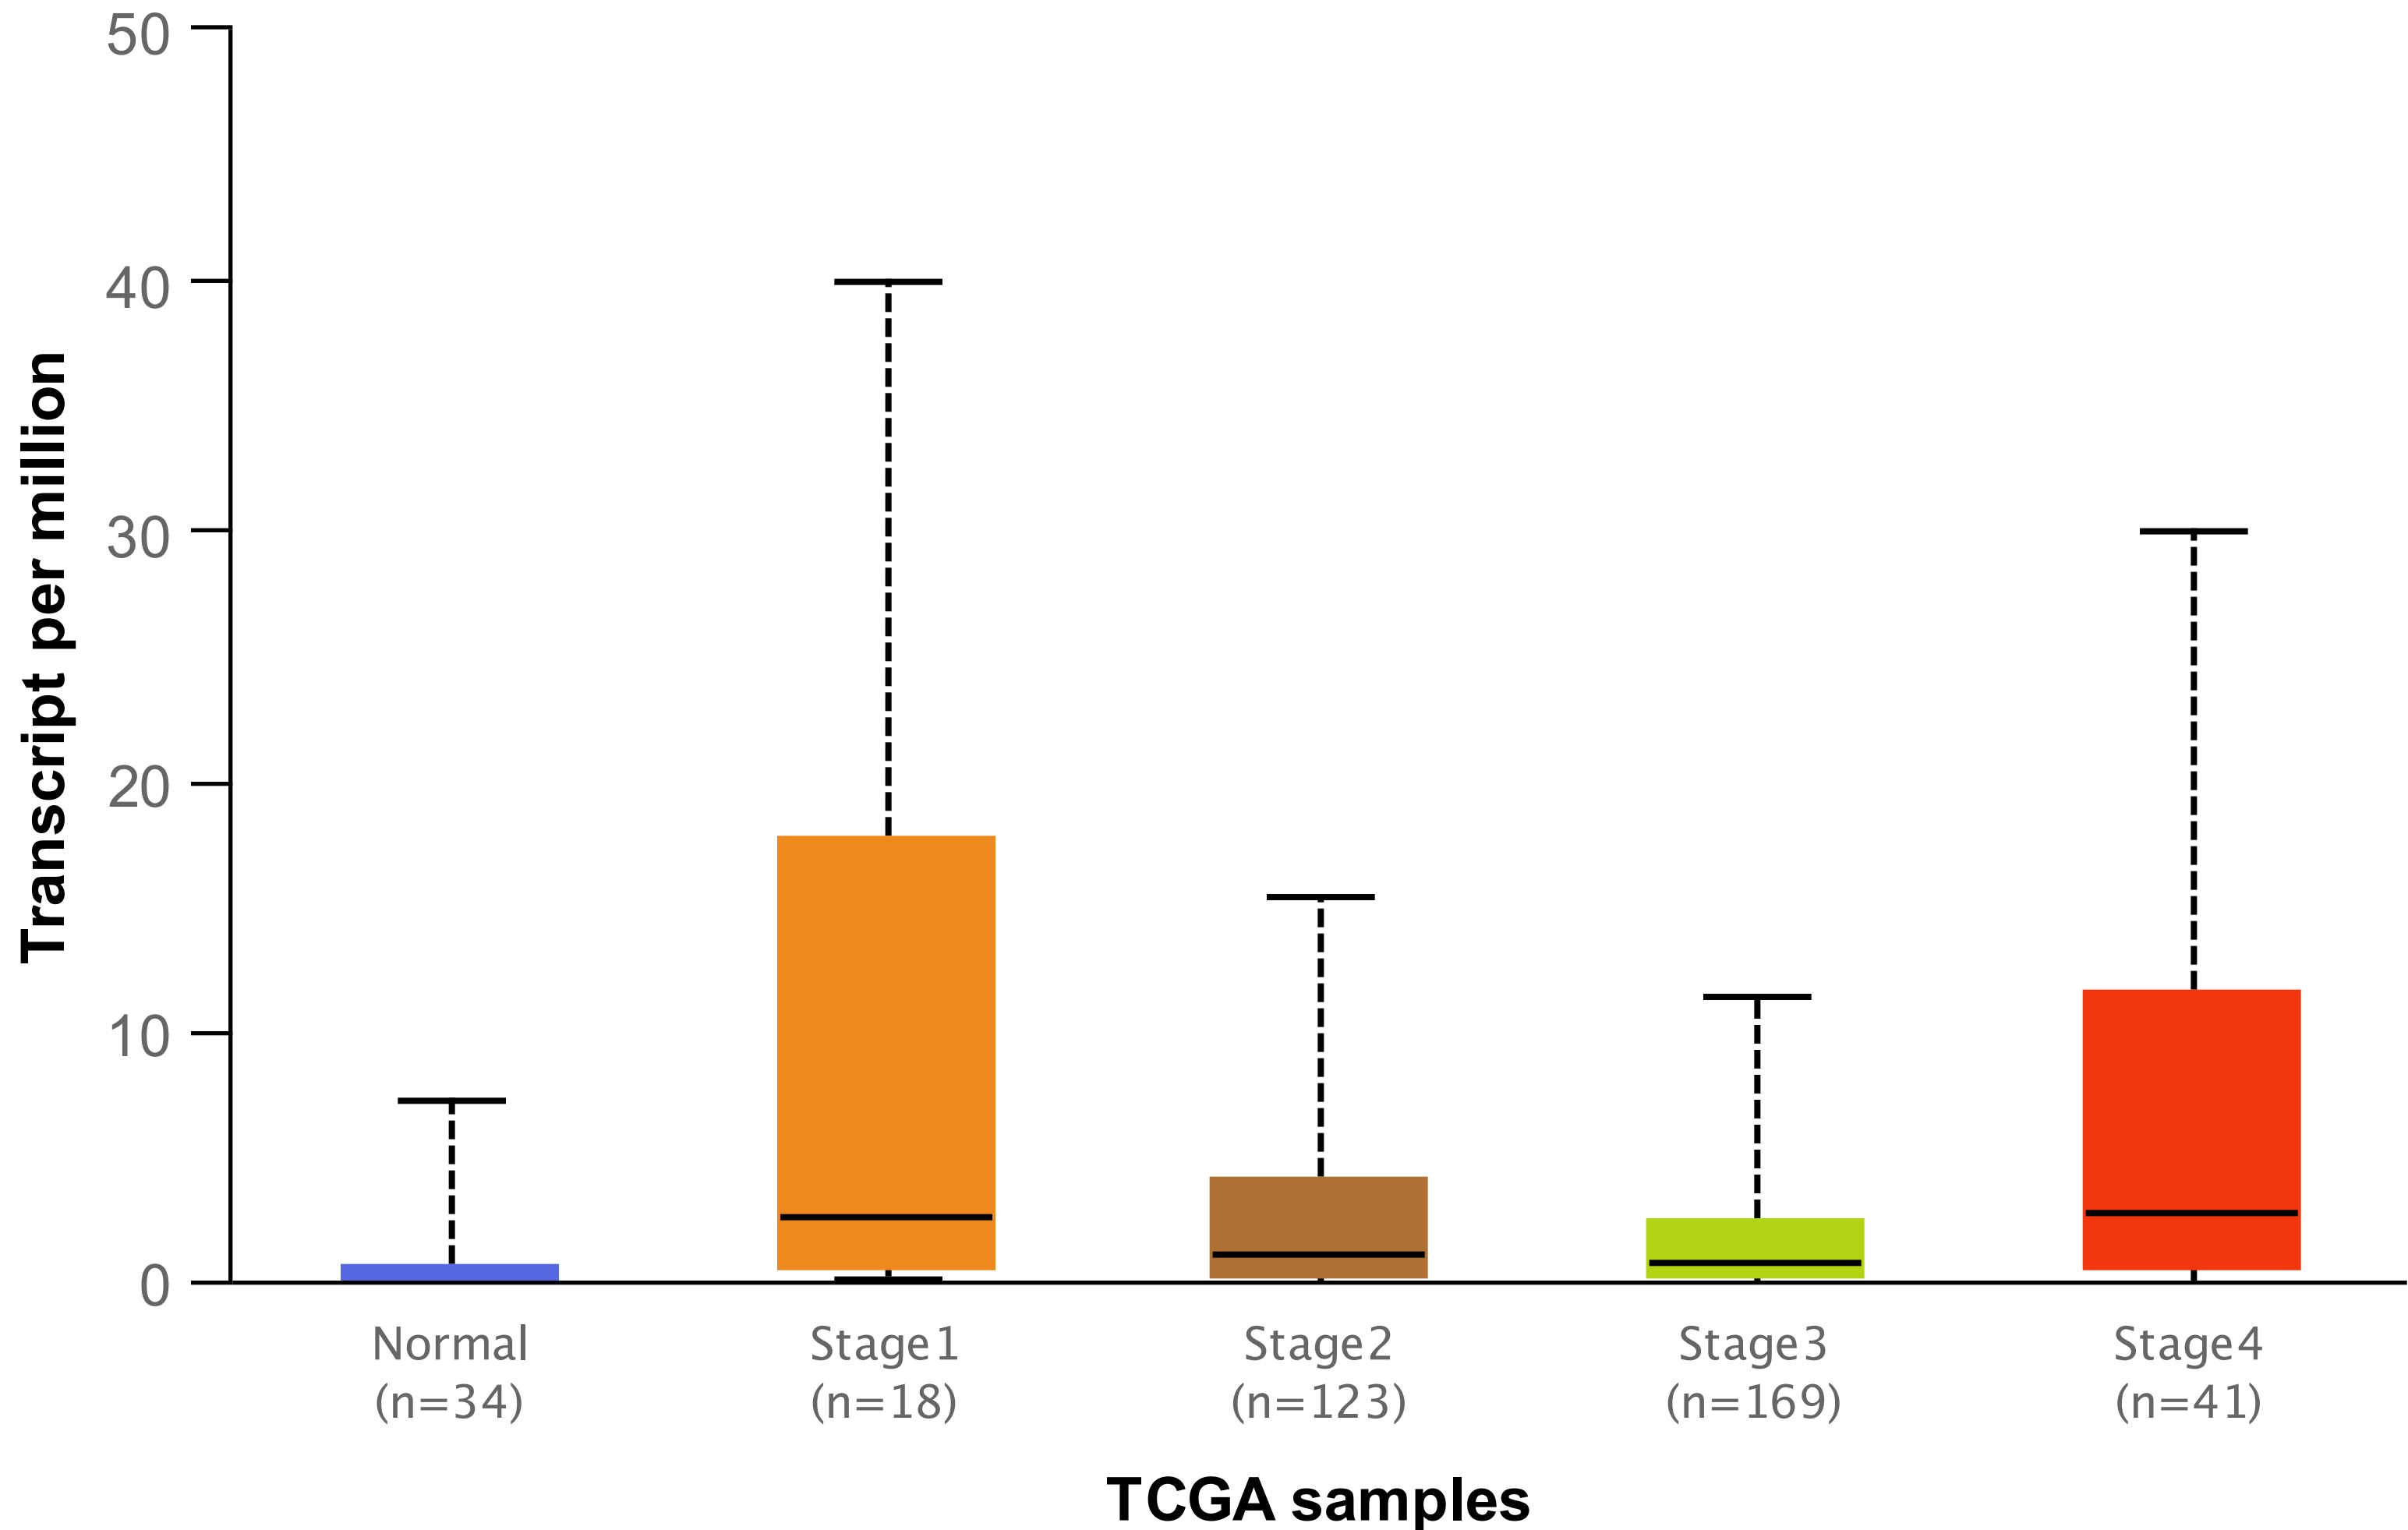

Supplement: Data_Sheet_5.ZIP [file Data_Sheet_5.ZIP]

# Expression of FAM83F in STAD based on individual cancer stages

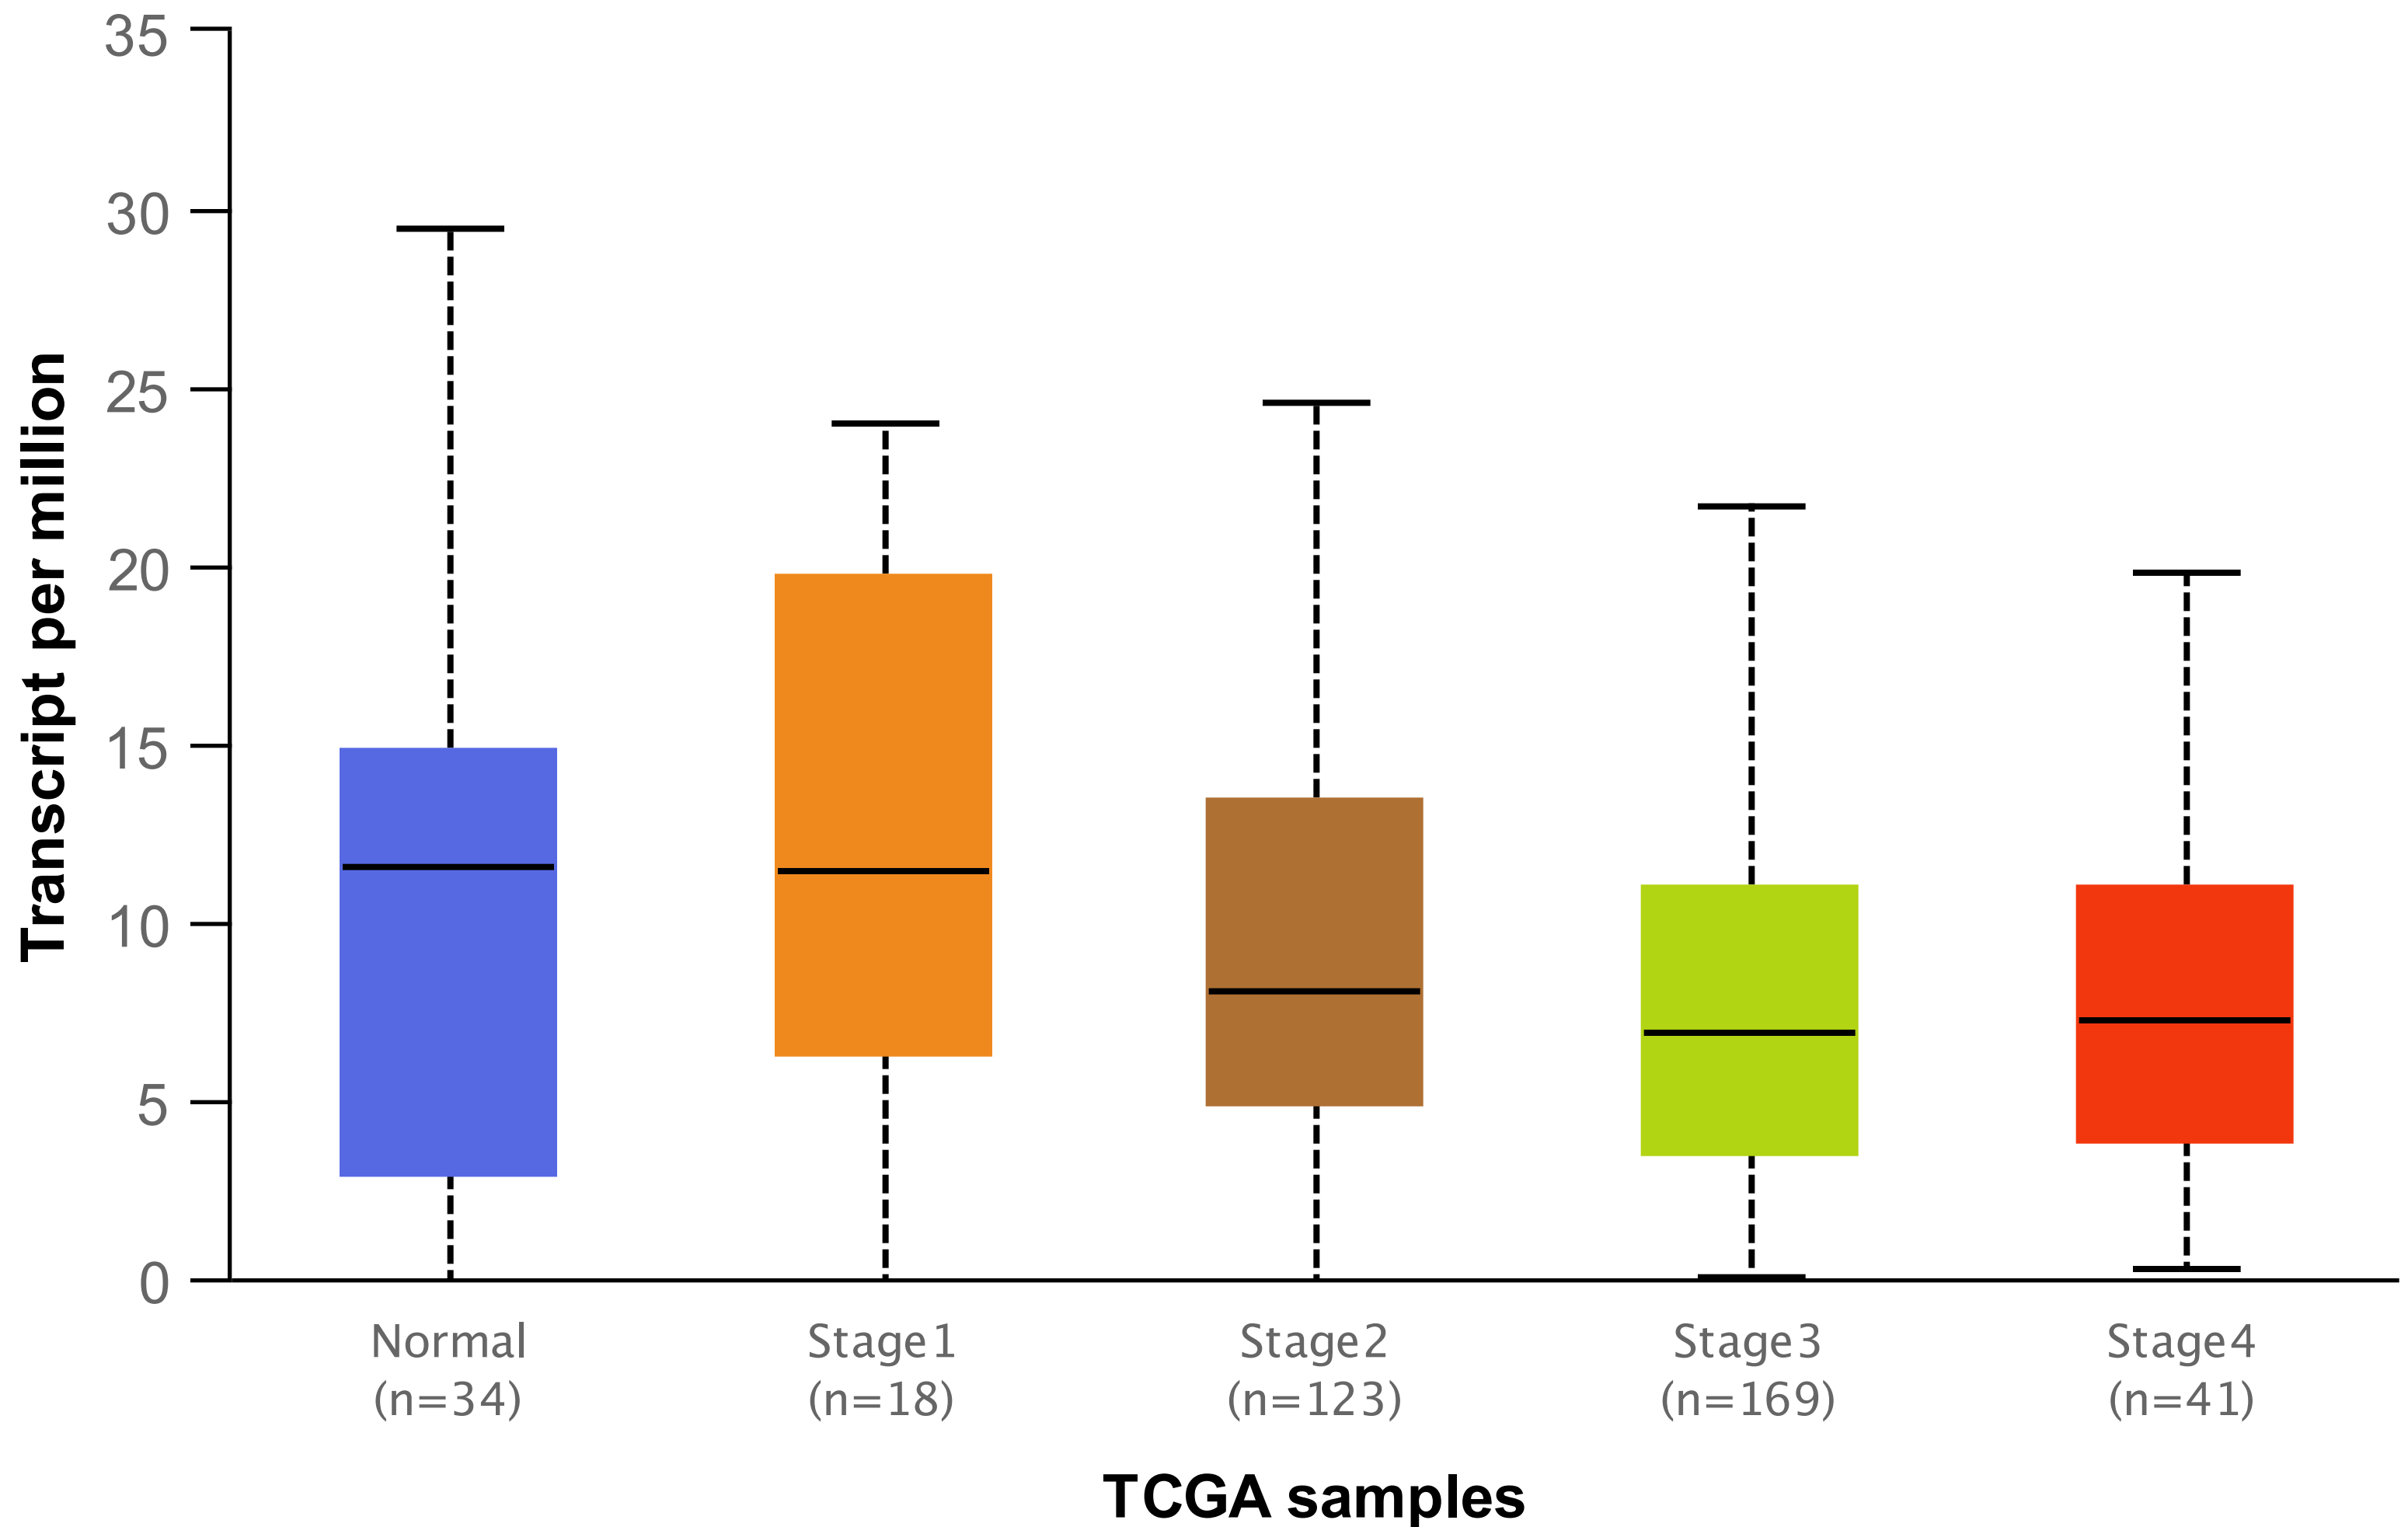

Supplement: Data_Sheet_5.ZIP [file Data_Sheet_5.ZIP]

# Expression of FAM83H in STAD based on individual cancer stages

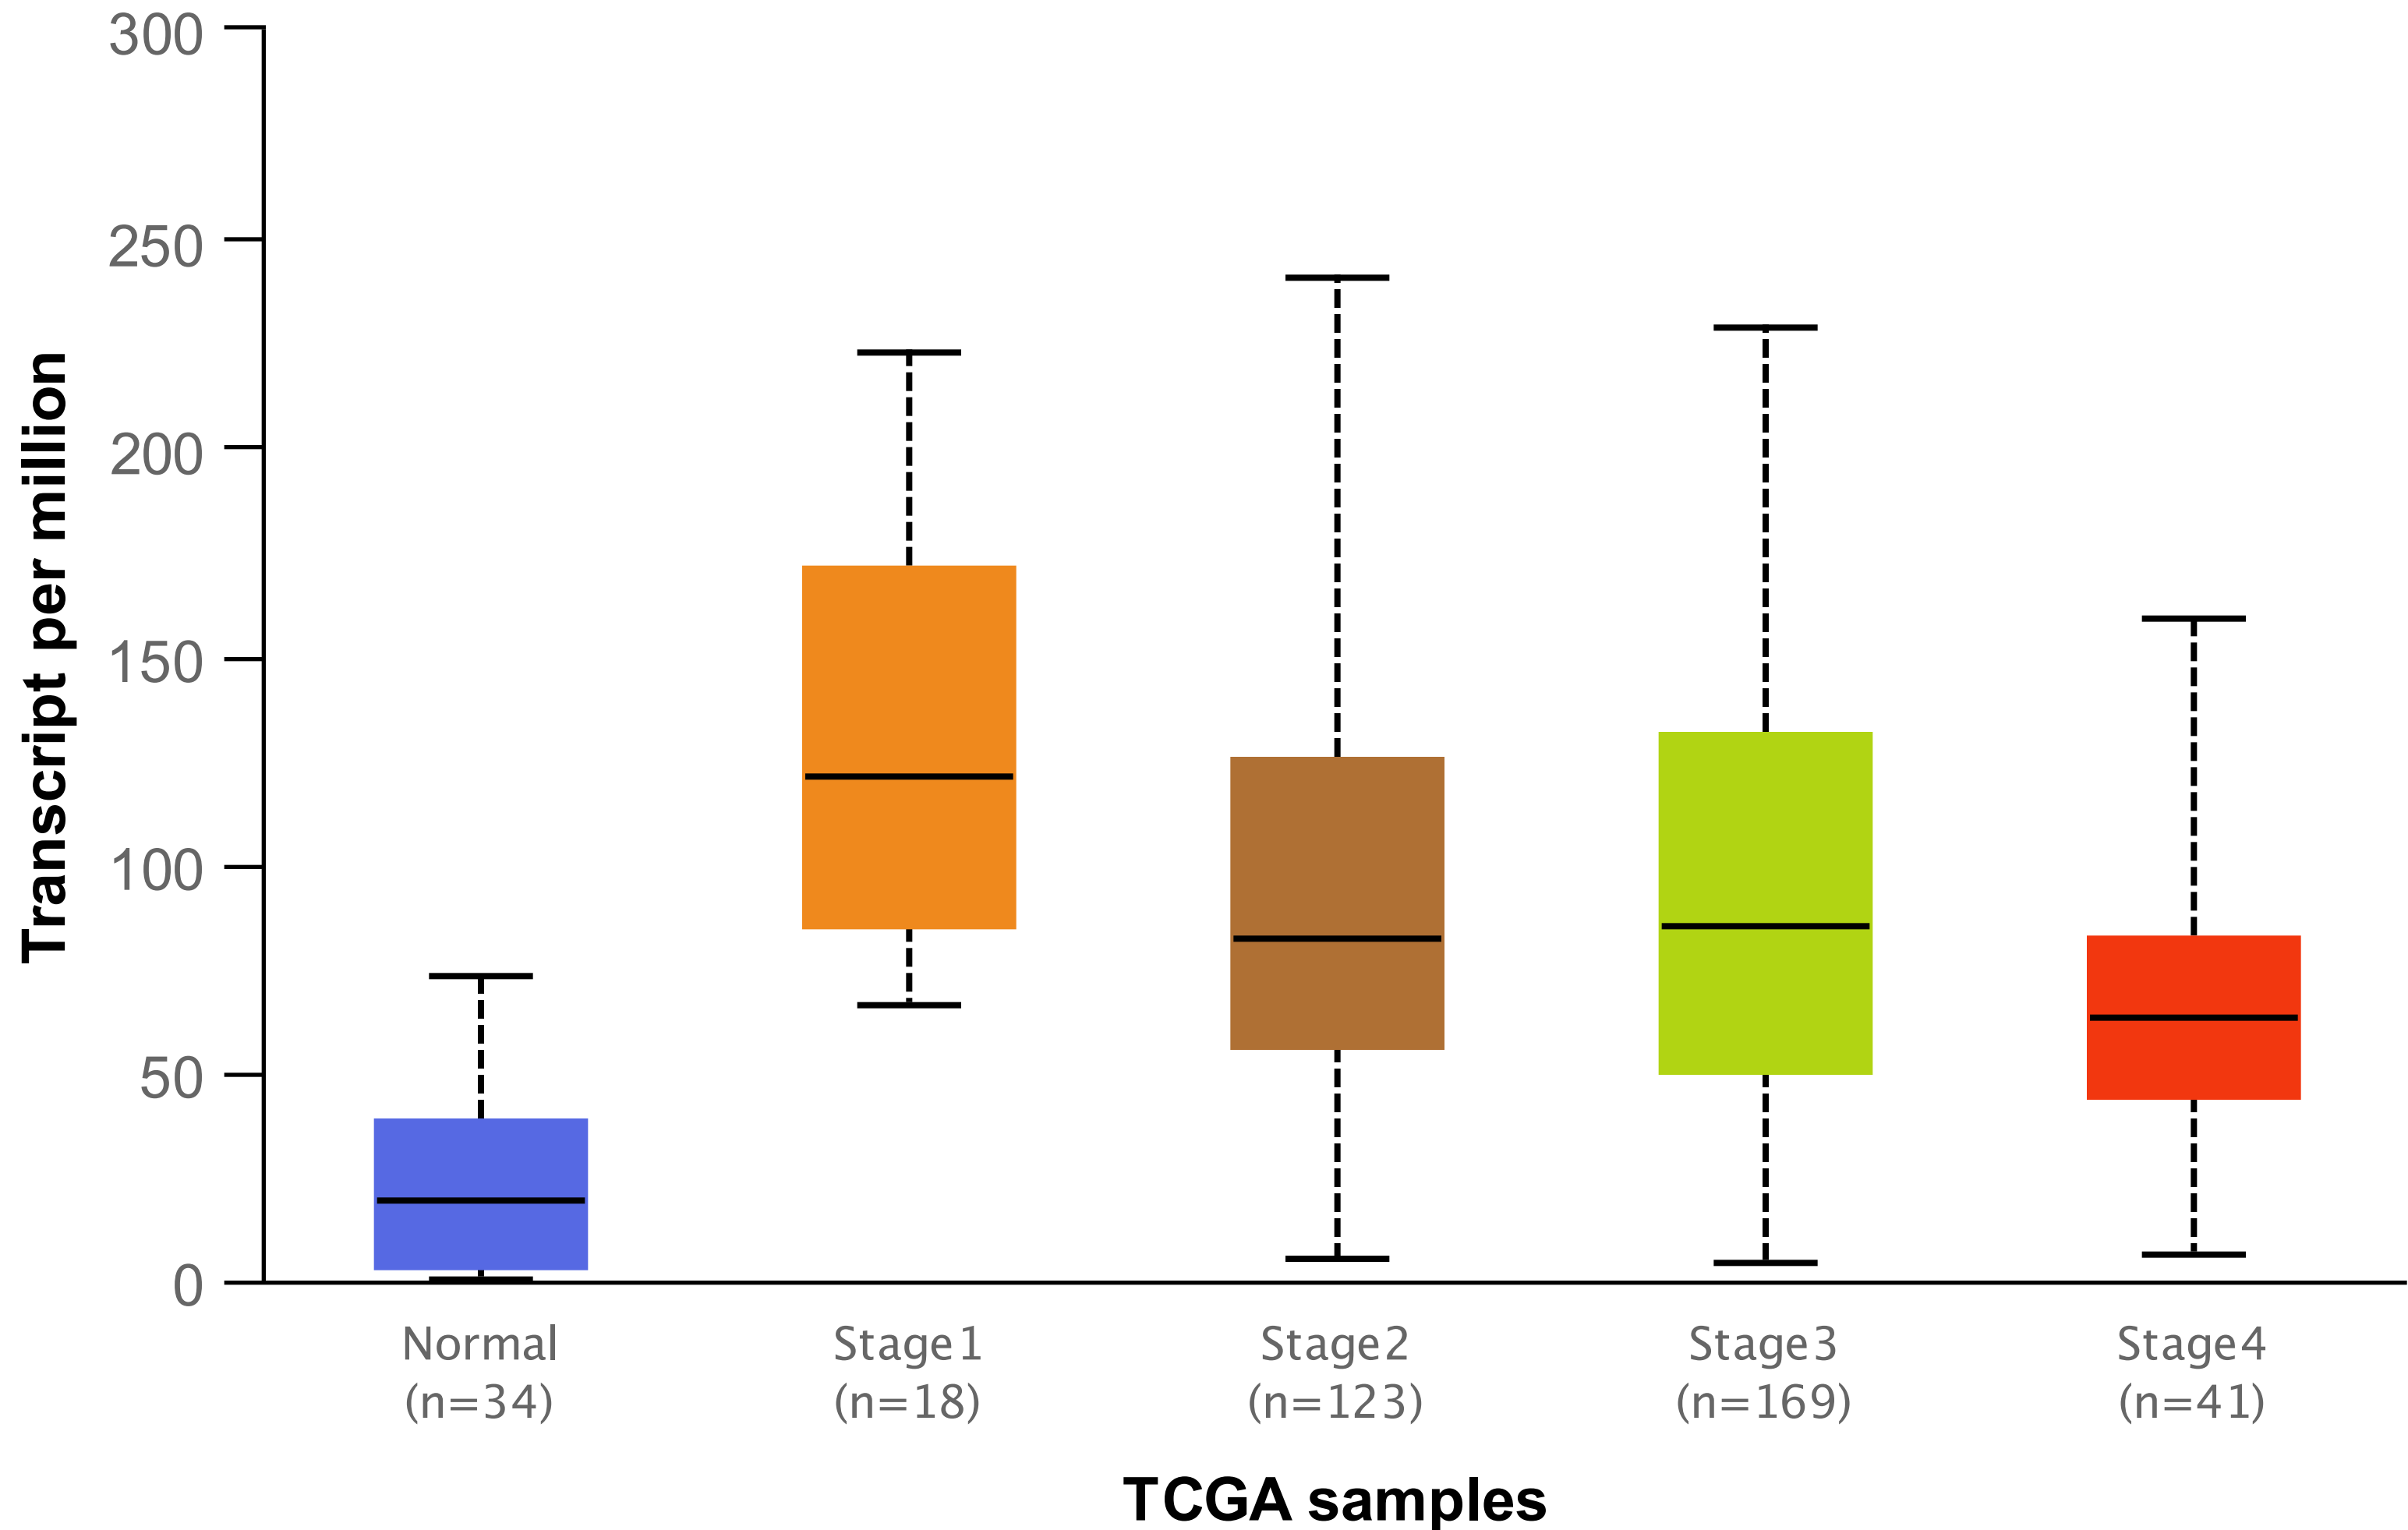

Supplement: Data_Sheet_5.ZIP [file Data_Sheet_5.ZIP]

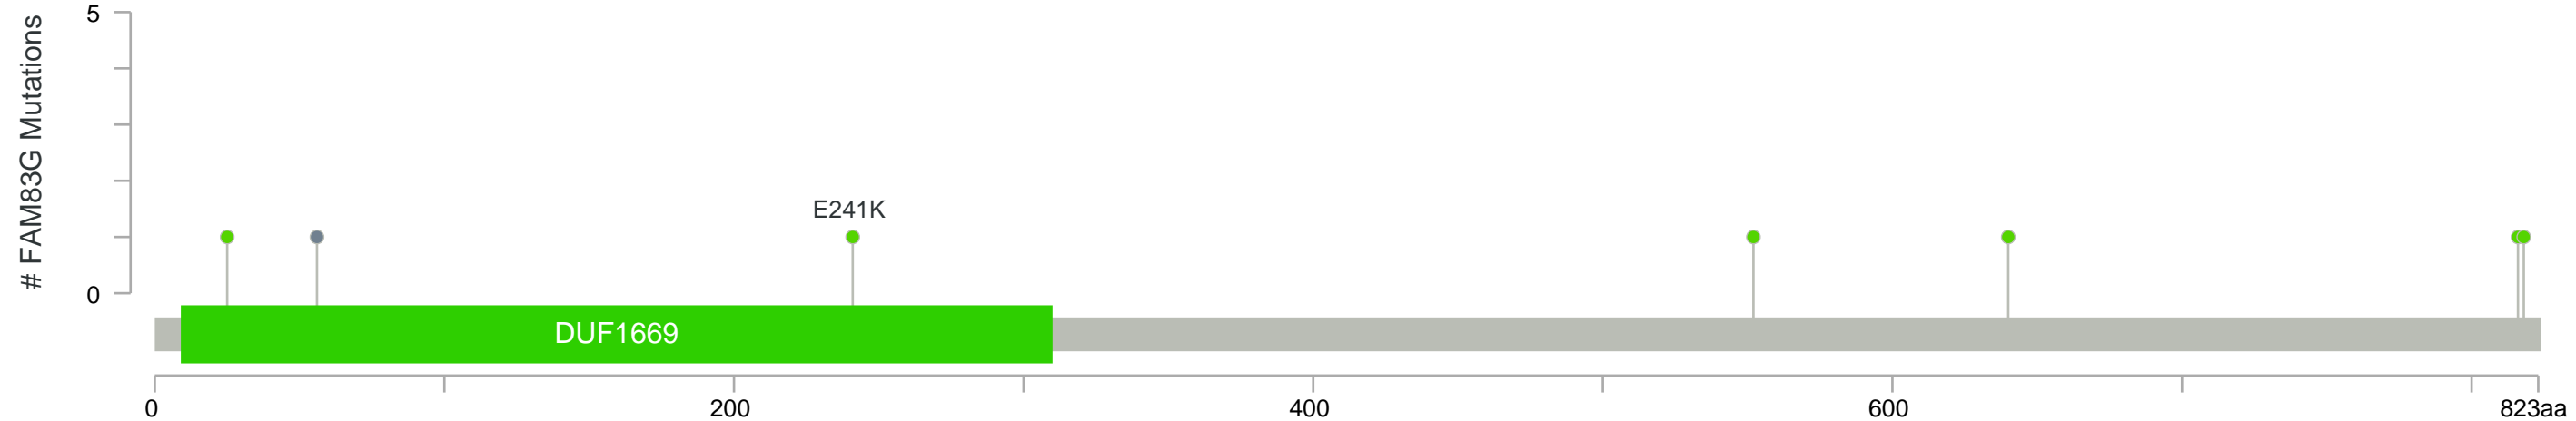

Supplement: Data_Sheet_6.ZIP [file Data_Sheet_6.ZIP]

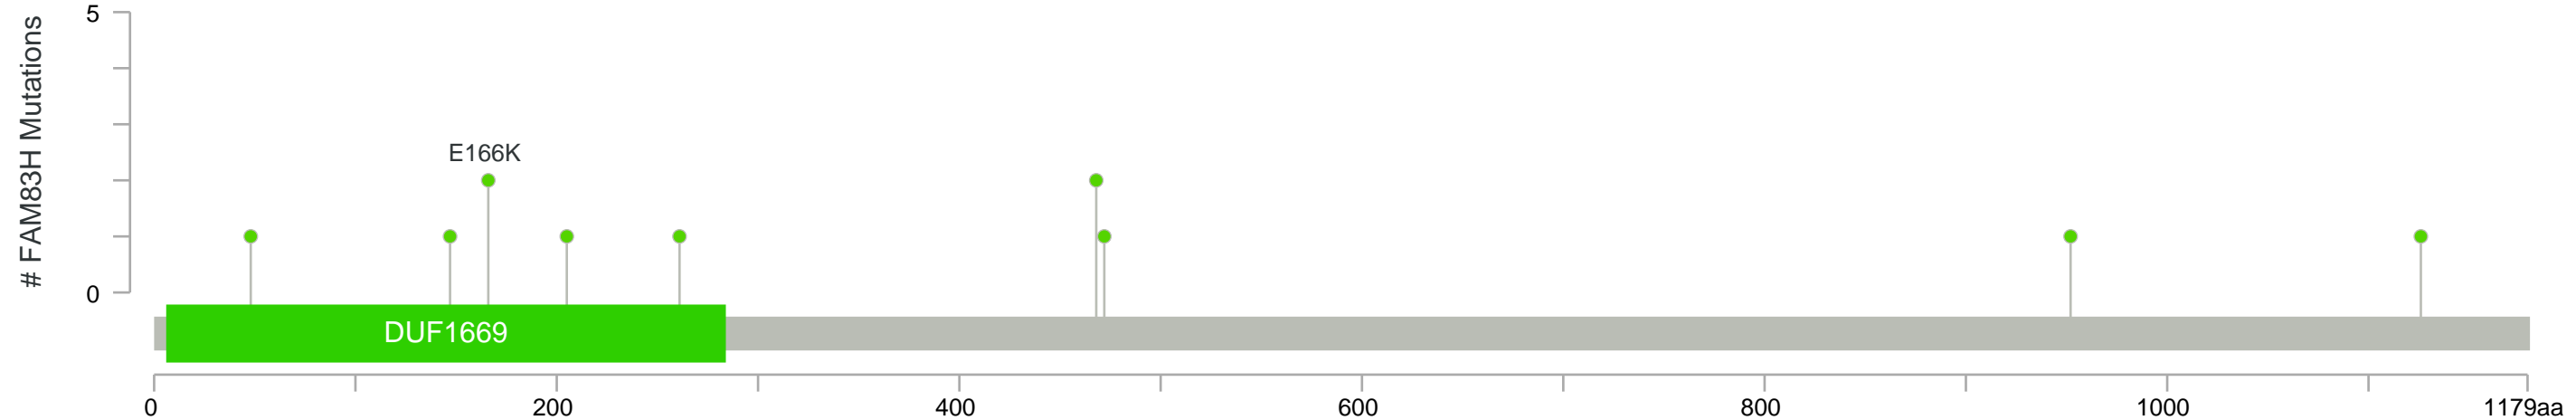

Supplement: Data_Sheet_6.ZIP [file Data_Sheet_6.ZIP]

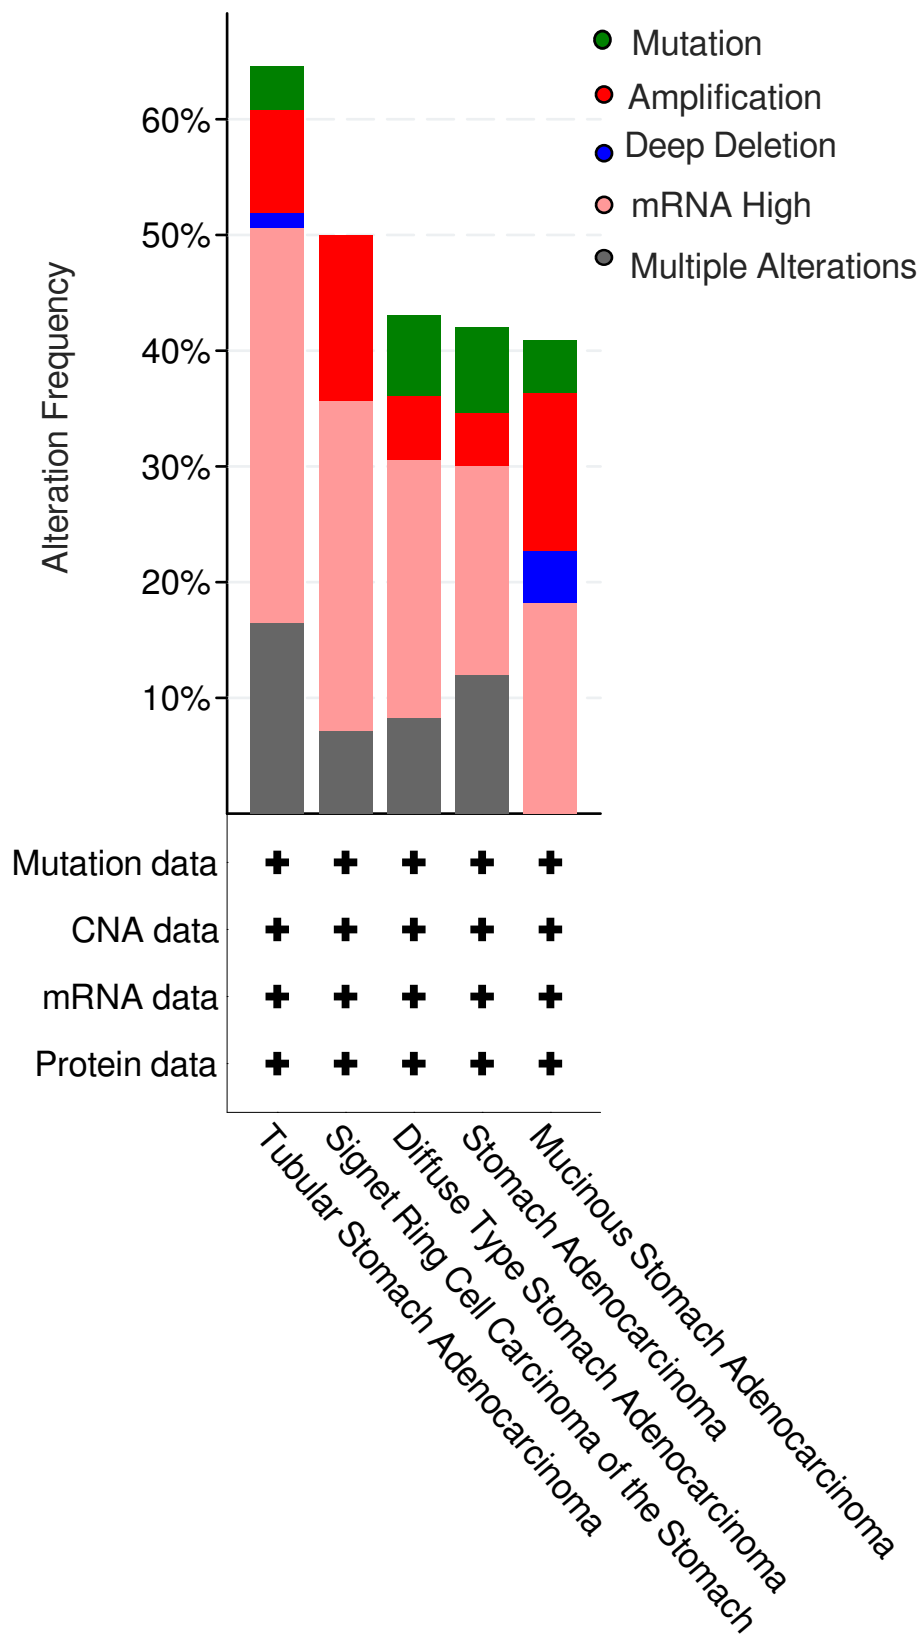

Supplement: Data_Sheet_6.ZIP [file Data_Sheet_6.ZIP]

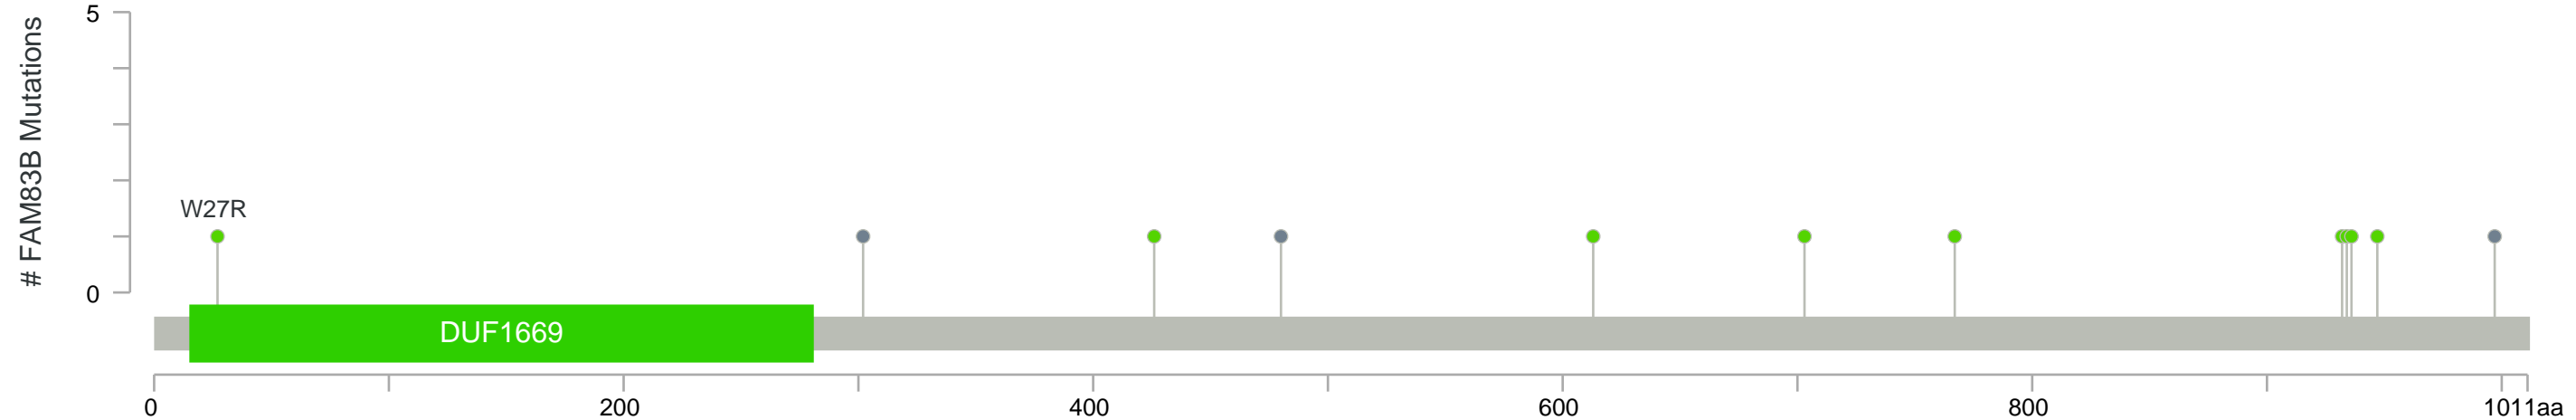

Supplement: Data_Sheet_6.ZIP [file Data_Sheet_6.ZIP]

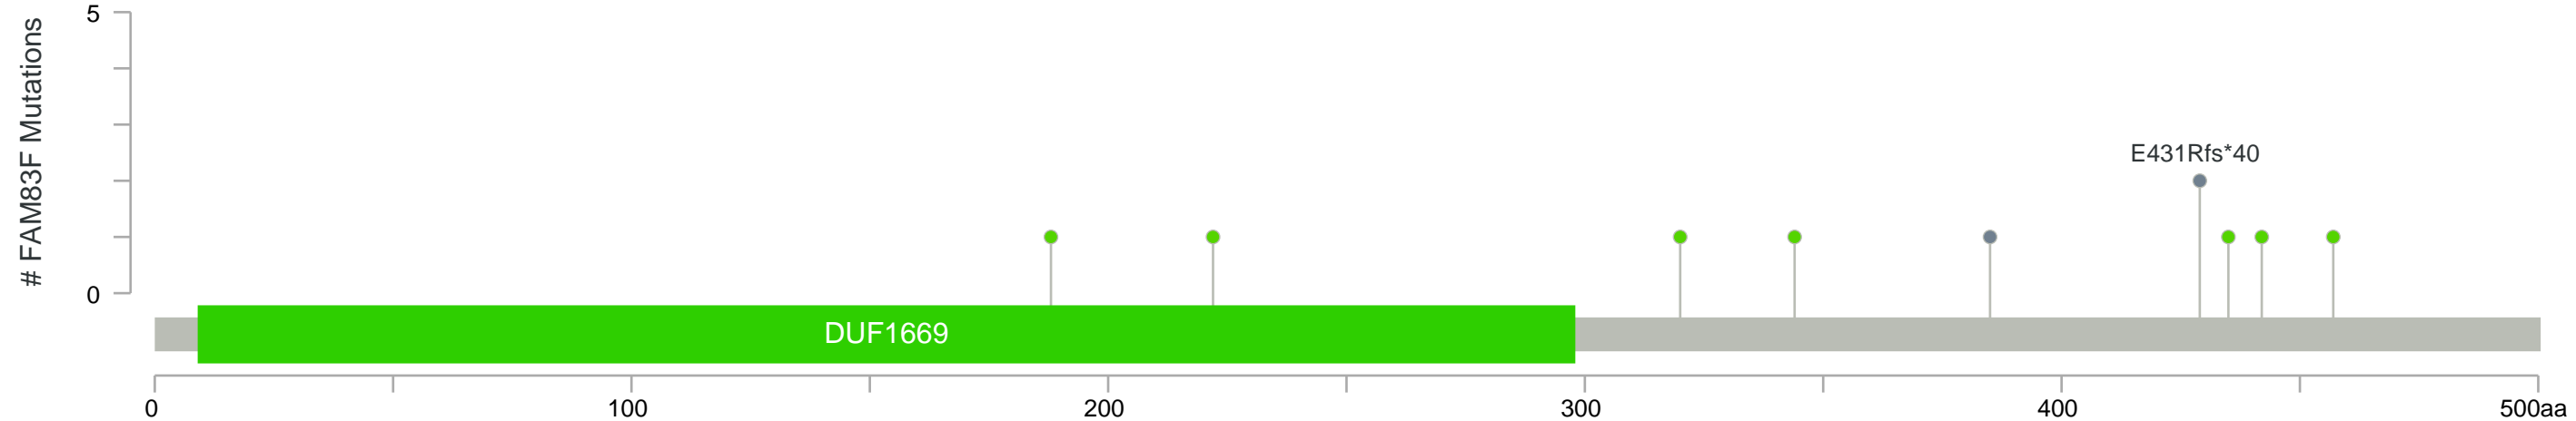

Supplement: Data_Sheet_6.ZIP [file Data_Sheet_6.ZIP]

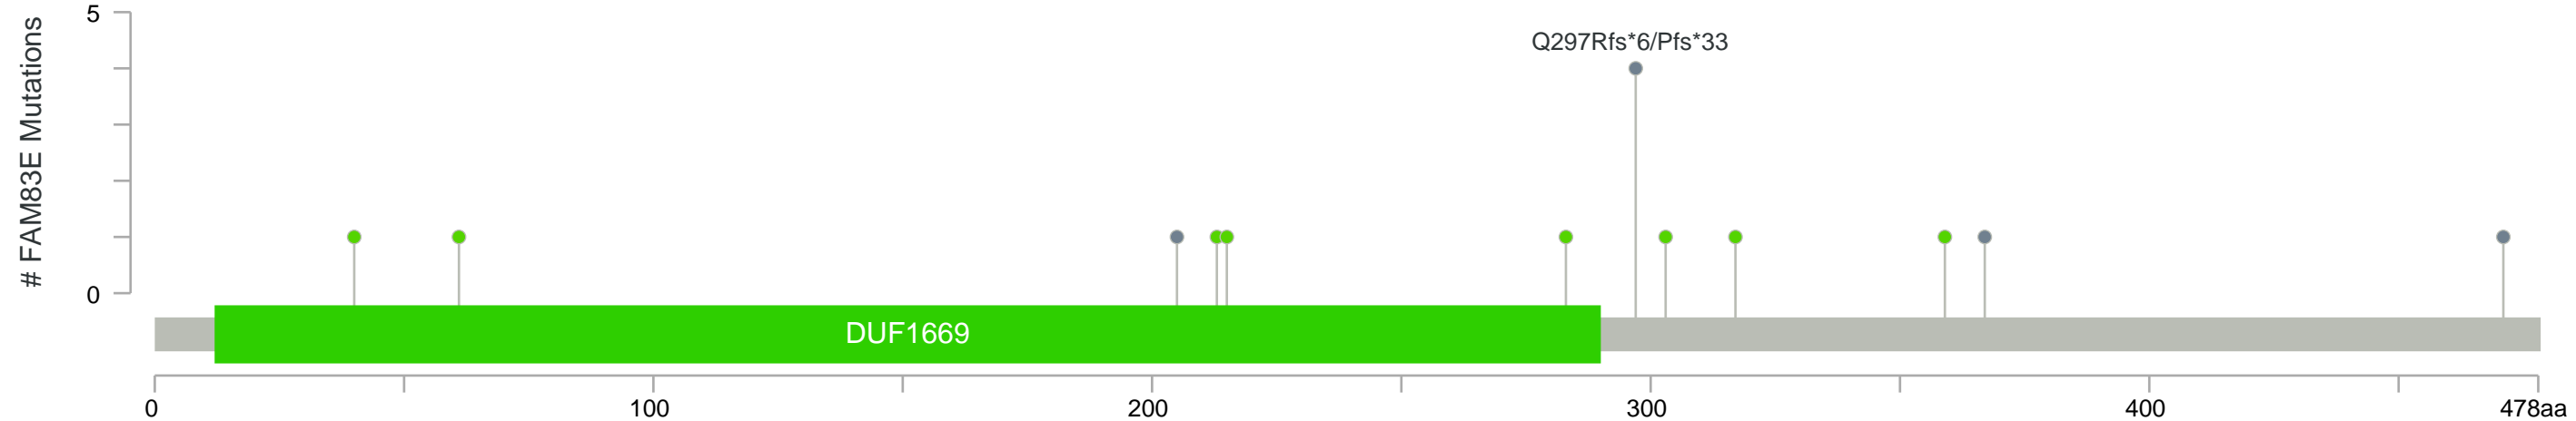

Supplement: Data_Sheet_6.ZIP [file Data_Sheet_6.ZIP]

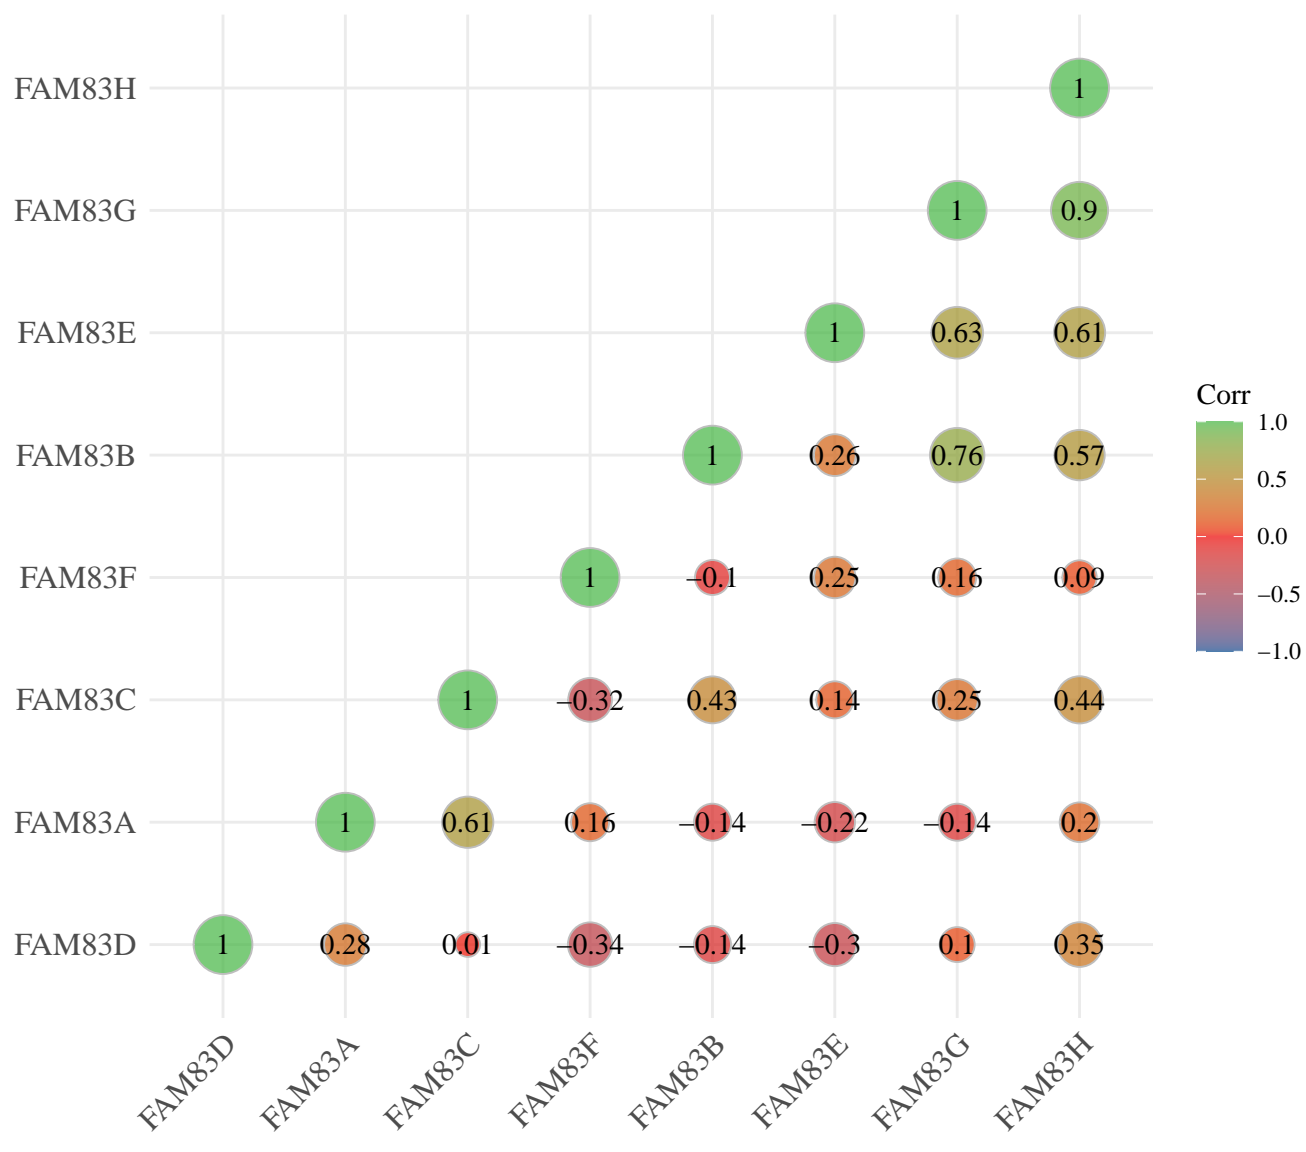

Supplement: Data_Sheet_6.ZIP [file Data_Sheet_6.ZIP]

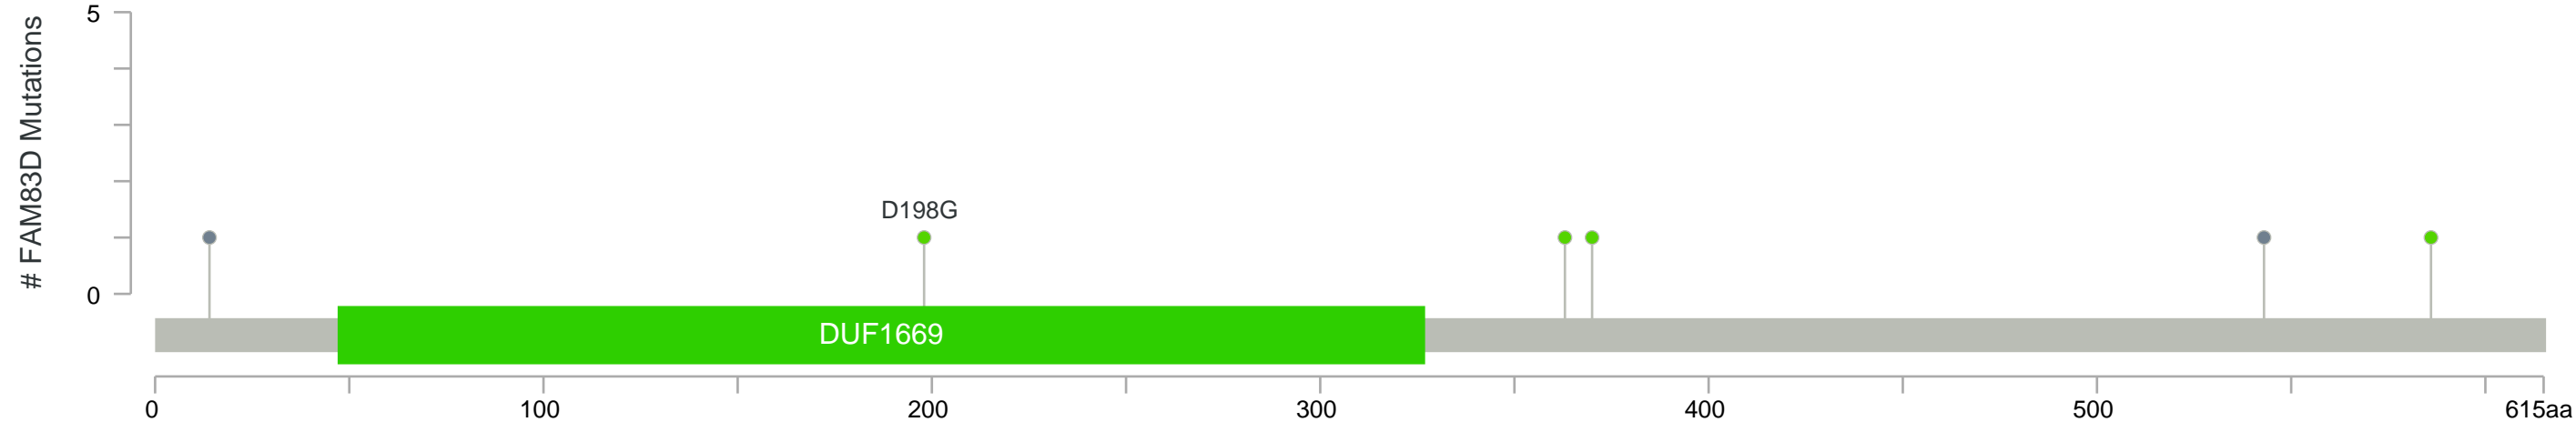

Supplement: Data_Sheet_6.ZIP [file Data_Sheet_6.ZIP]

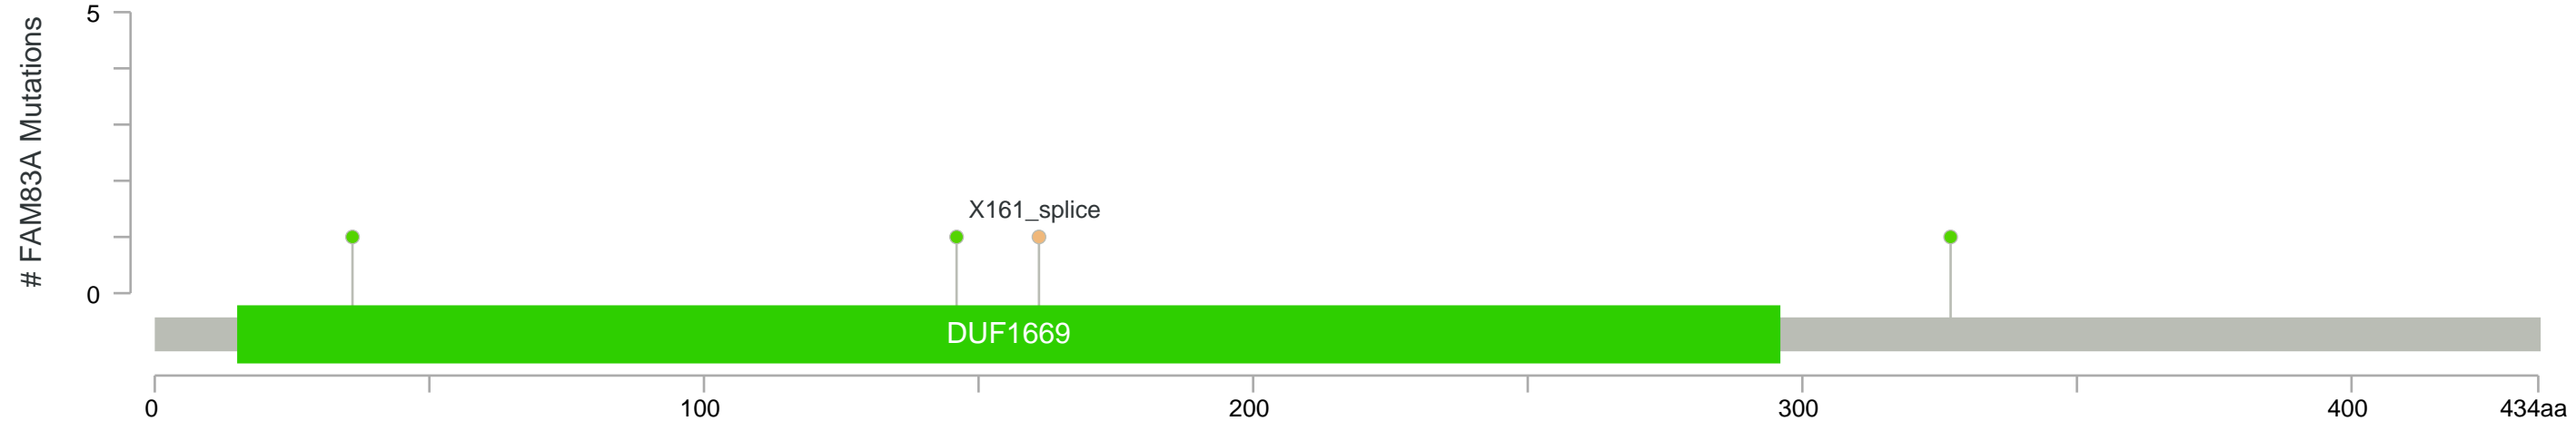

Supplement: Data_Sheet_6.ZIP [file Data_Sheet_6.ZIP]

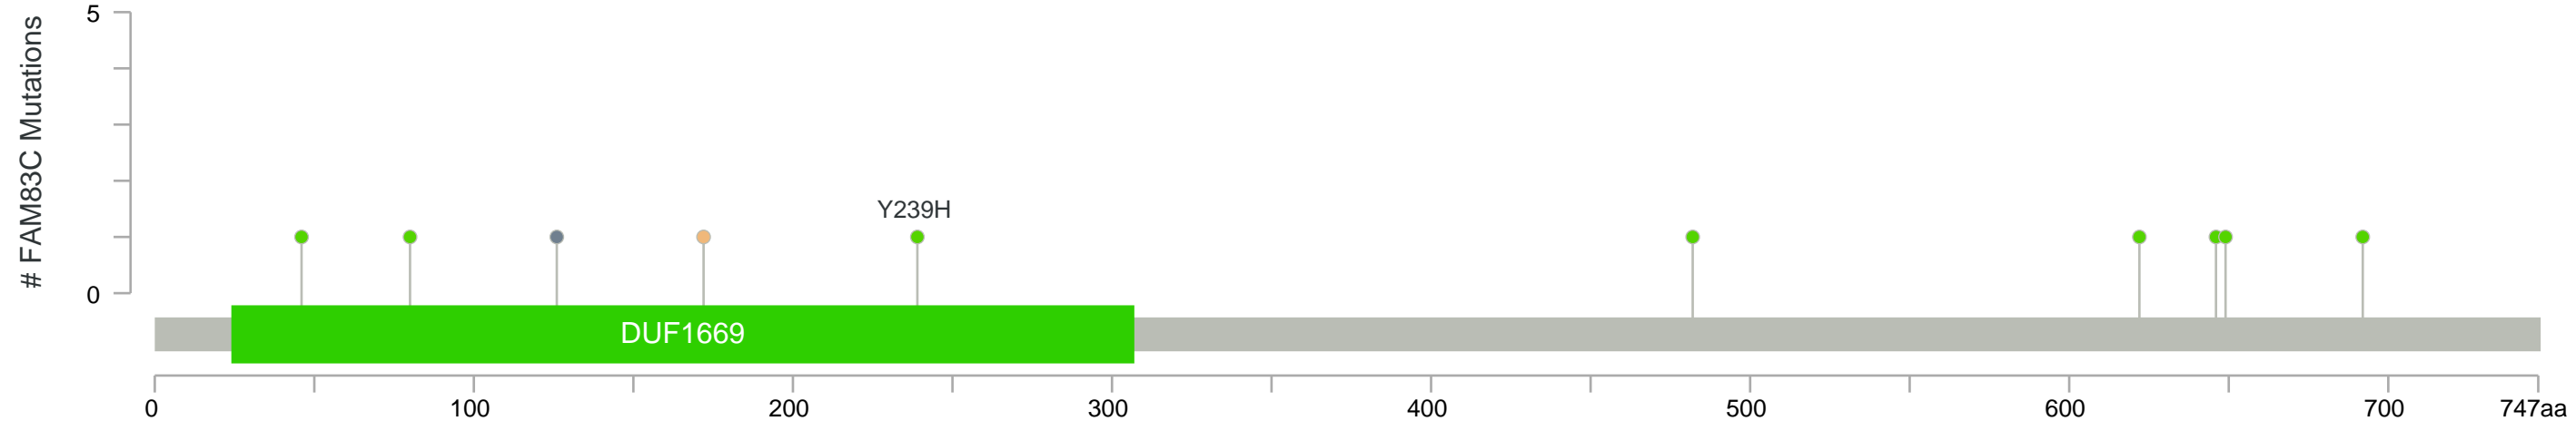

Supplement: Data_Sheet_6.ZIP [file Data_Sheet_6.ZIP]

# Molecular Function\_Enrichment

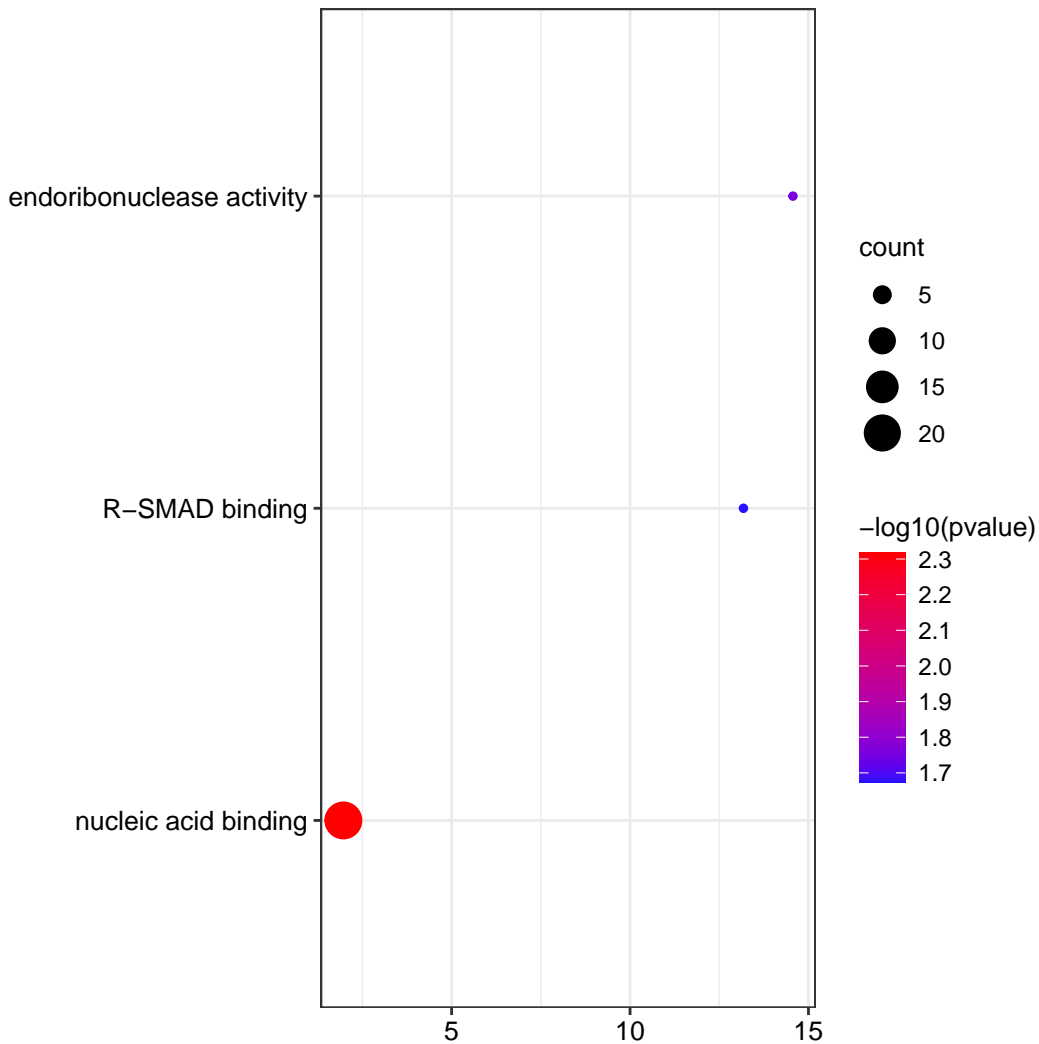

Supplement: Data_Sheet_7.ZIP [file Data_Sheet_7.ZIP]

# KEGG\_Enrichment

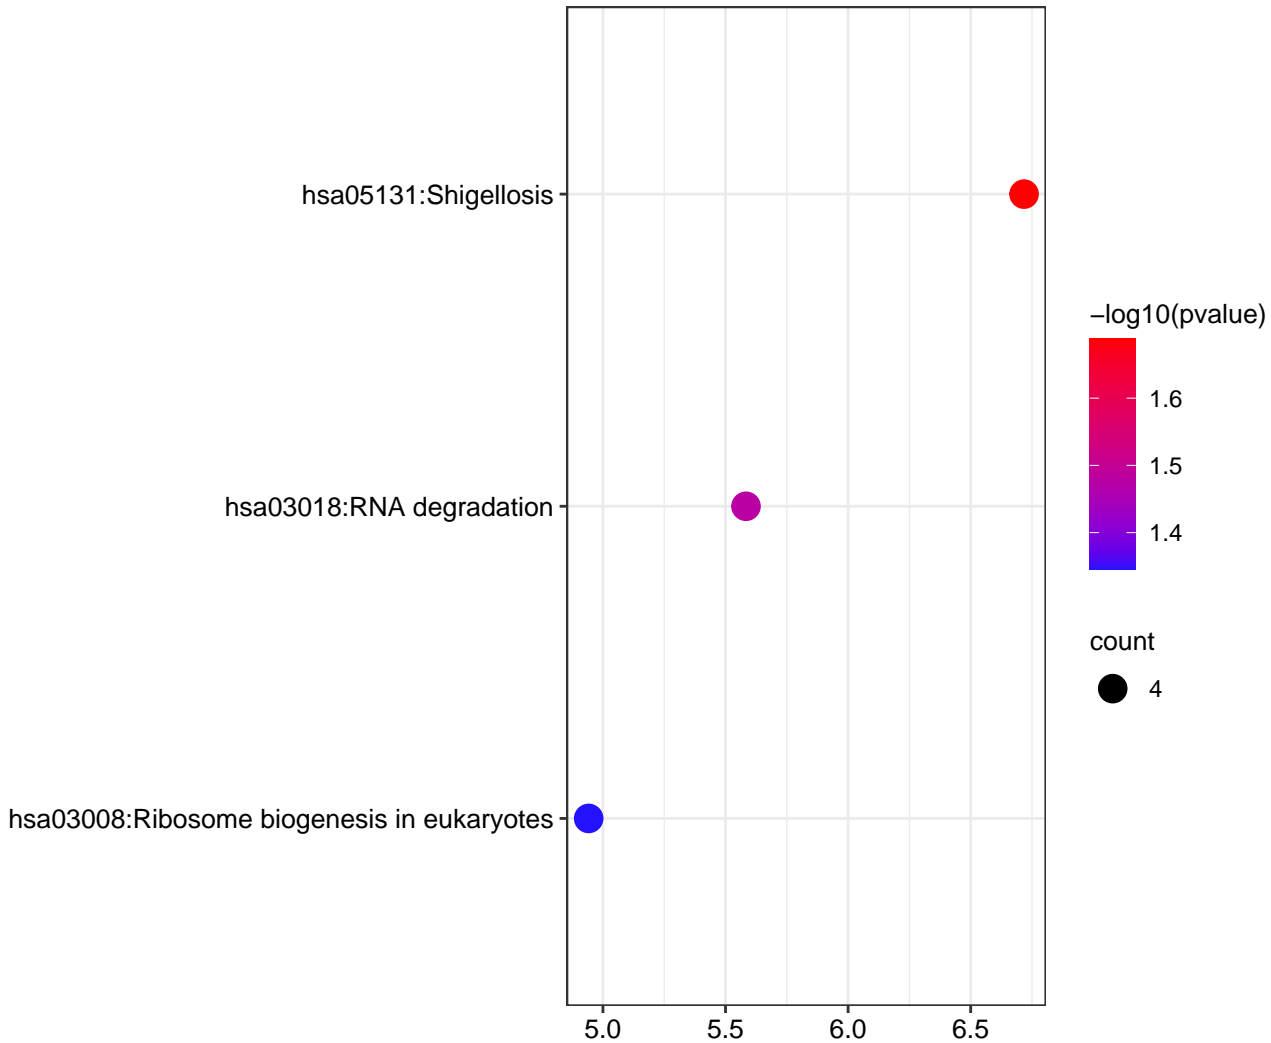

Supplement: Data_Sheet_7.ZIP [file Data_Sheet_7.ZIP]

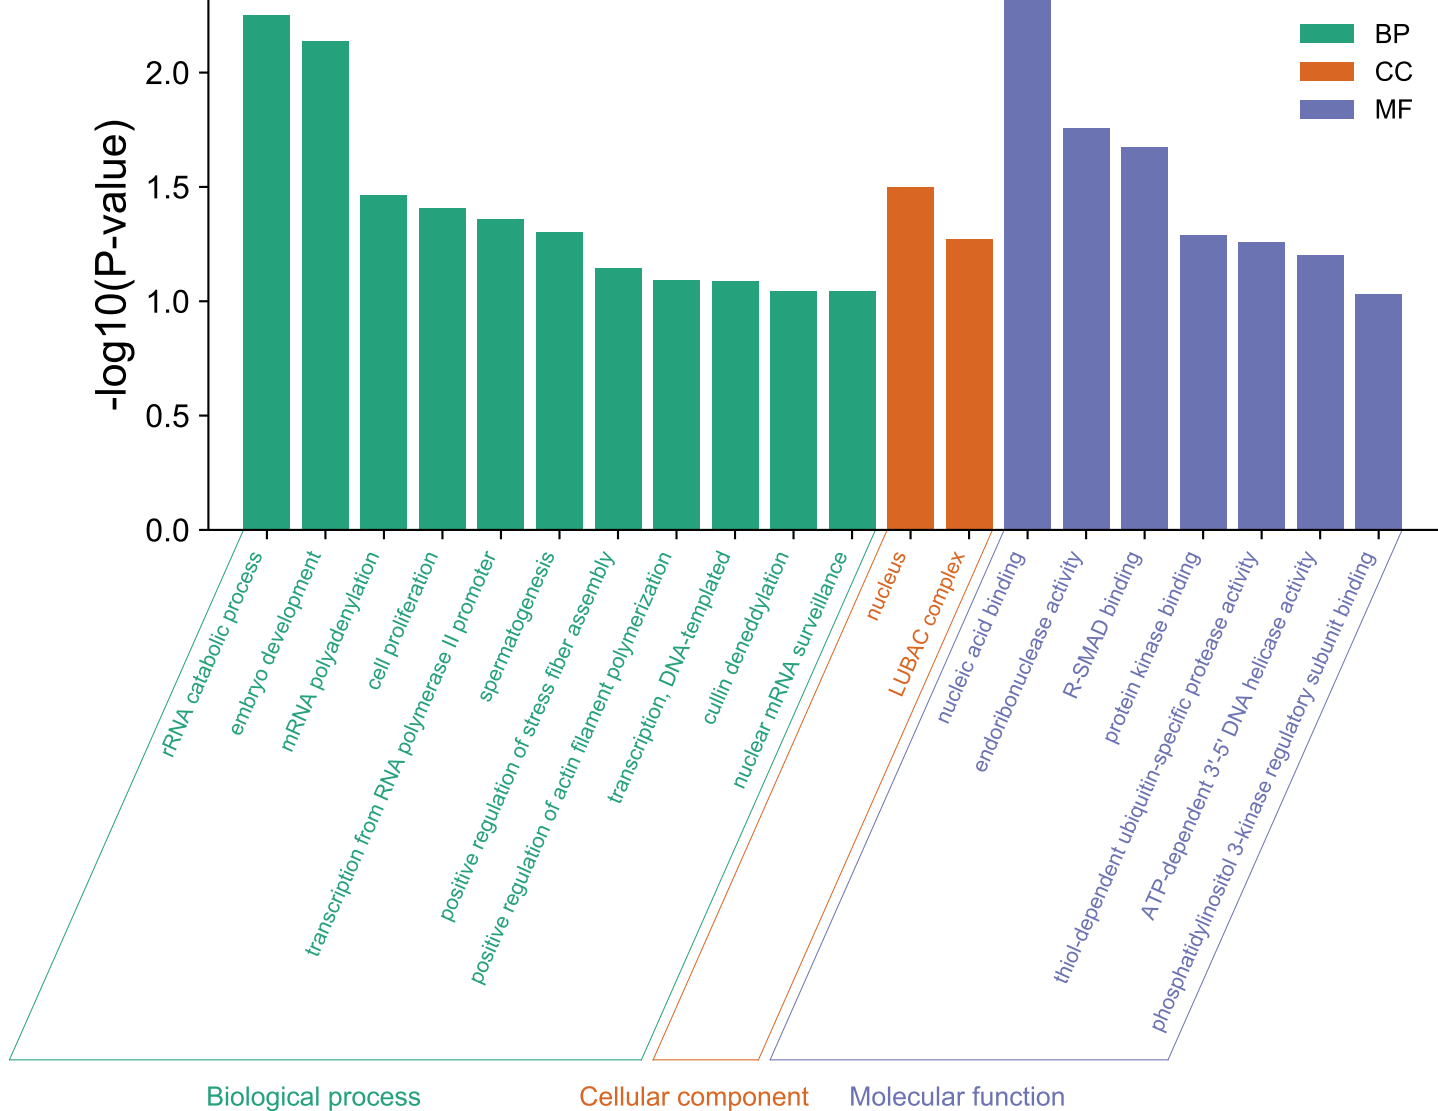

Supplement: Data_Sheet_7.ZIP [file Data_Sheet_7.ZIP]

# Biological Process\_Enrichment

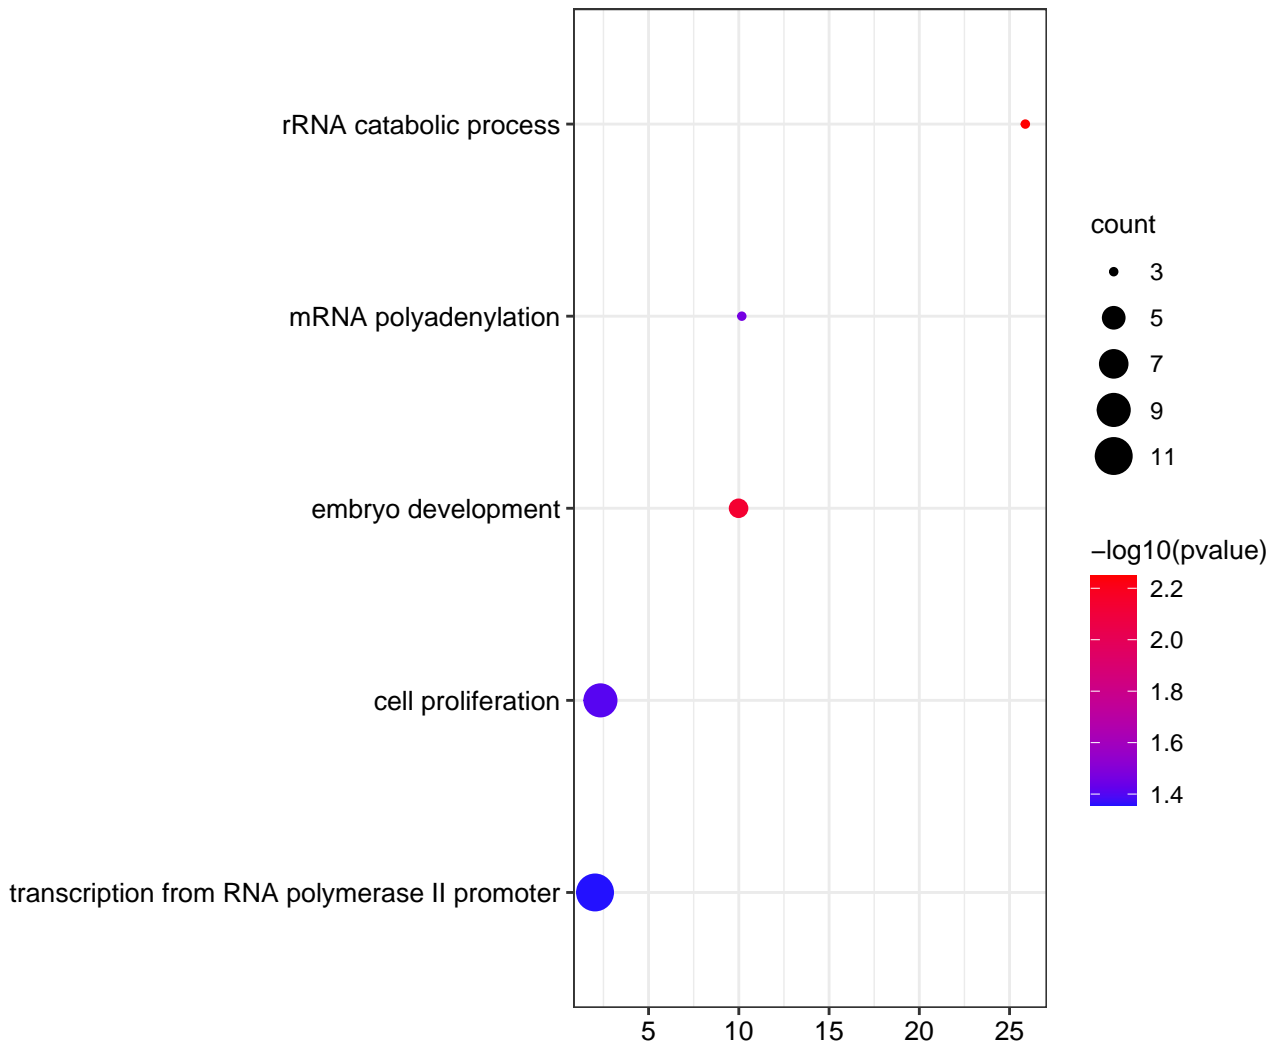

Supplement: Data_Sheet_7.ZIP [file Data_Sheet_7.ZIP]

# Cellular Component\_Enrichment

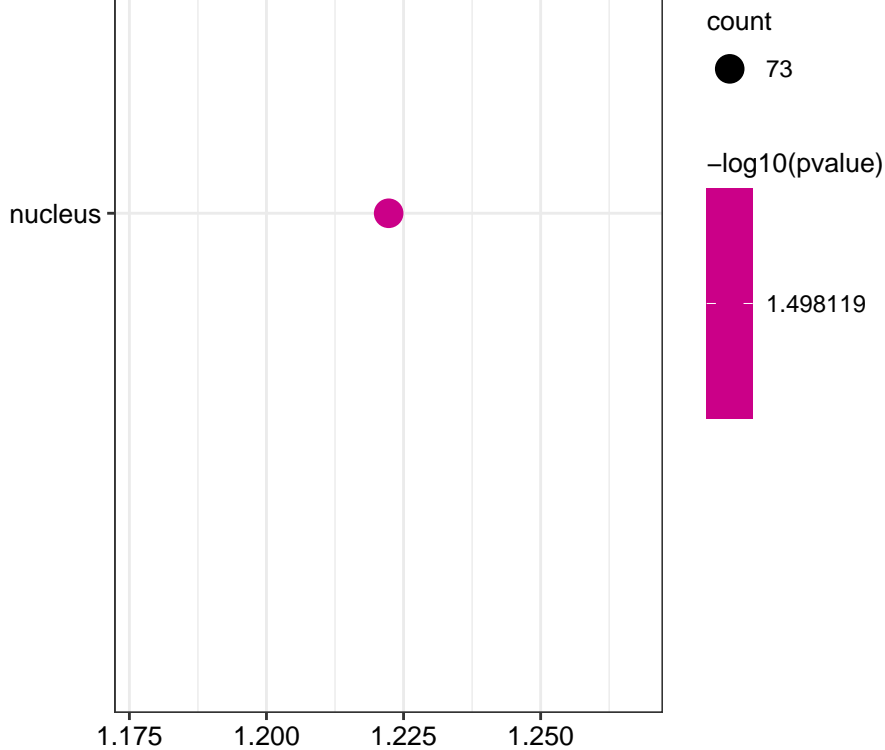

Supplement: Data_Sheet_7.ZIP [file Data_Sheet_7.ZIP]

# FAM83D (225687\_at)

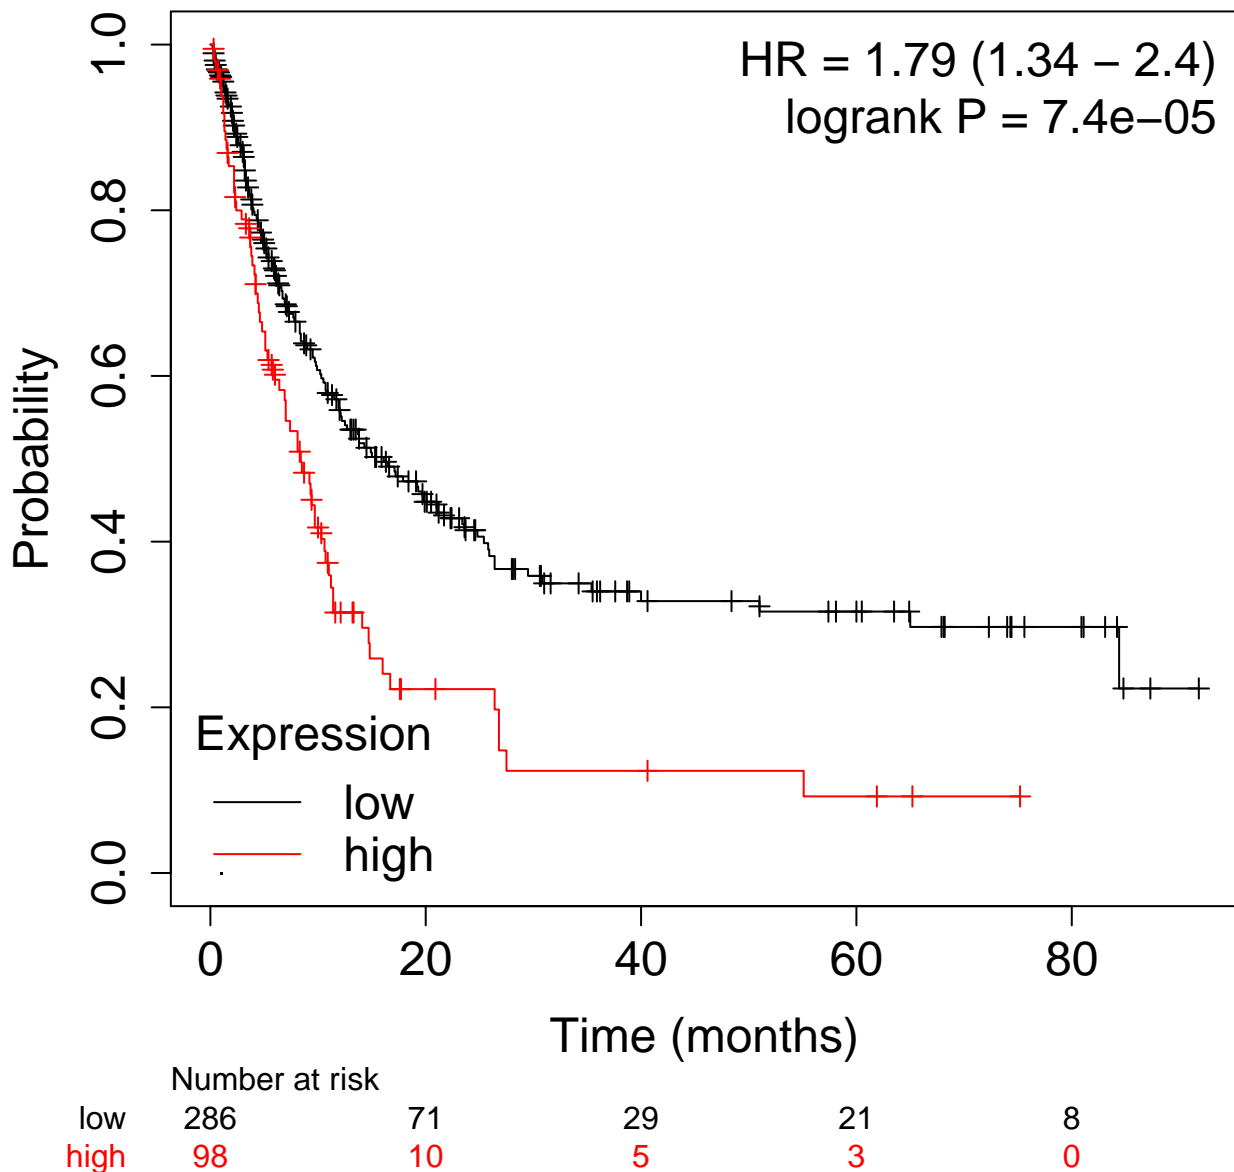

Supplement: Data_Sheet_8.ZIP [file Data_Sheet_8.ZIP]

# FAM83E (220312\_at)

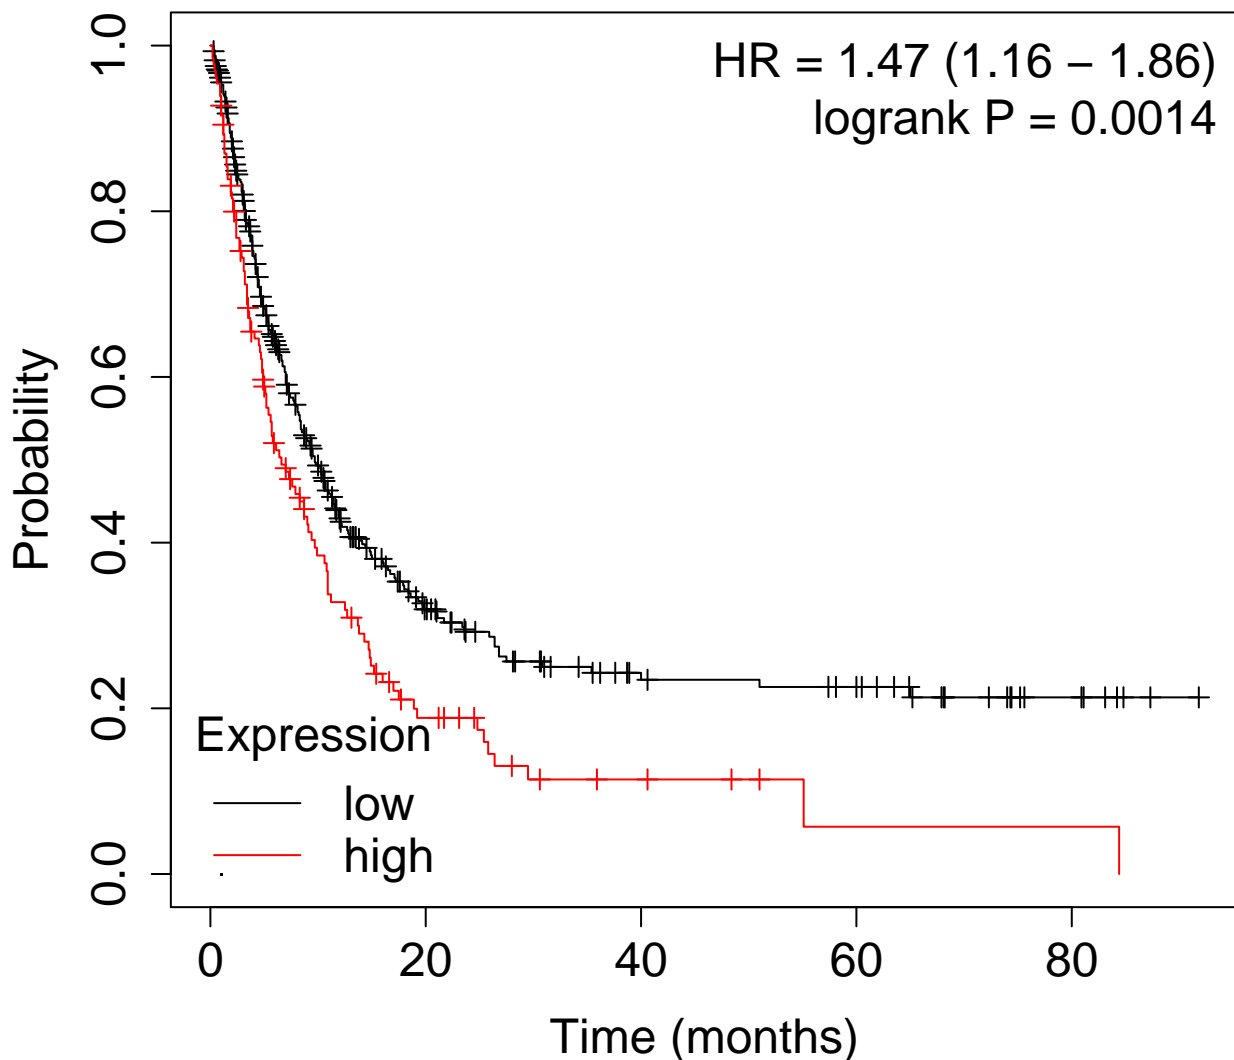

Number at risk

|      |     |    |    |    |   |
|------|-----|----|----|----|---|
| low  | 367 | 64 | 29 | 23 | 7 |
| high | 131 | 17 | 5  | 1  | 1 |

Supplement: Data_Sheet_8.ZIP [file Data_Sheet_8.ZIP]

# FAM83B (232202\_at)

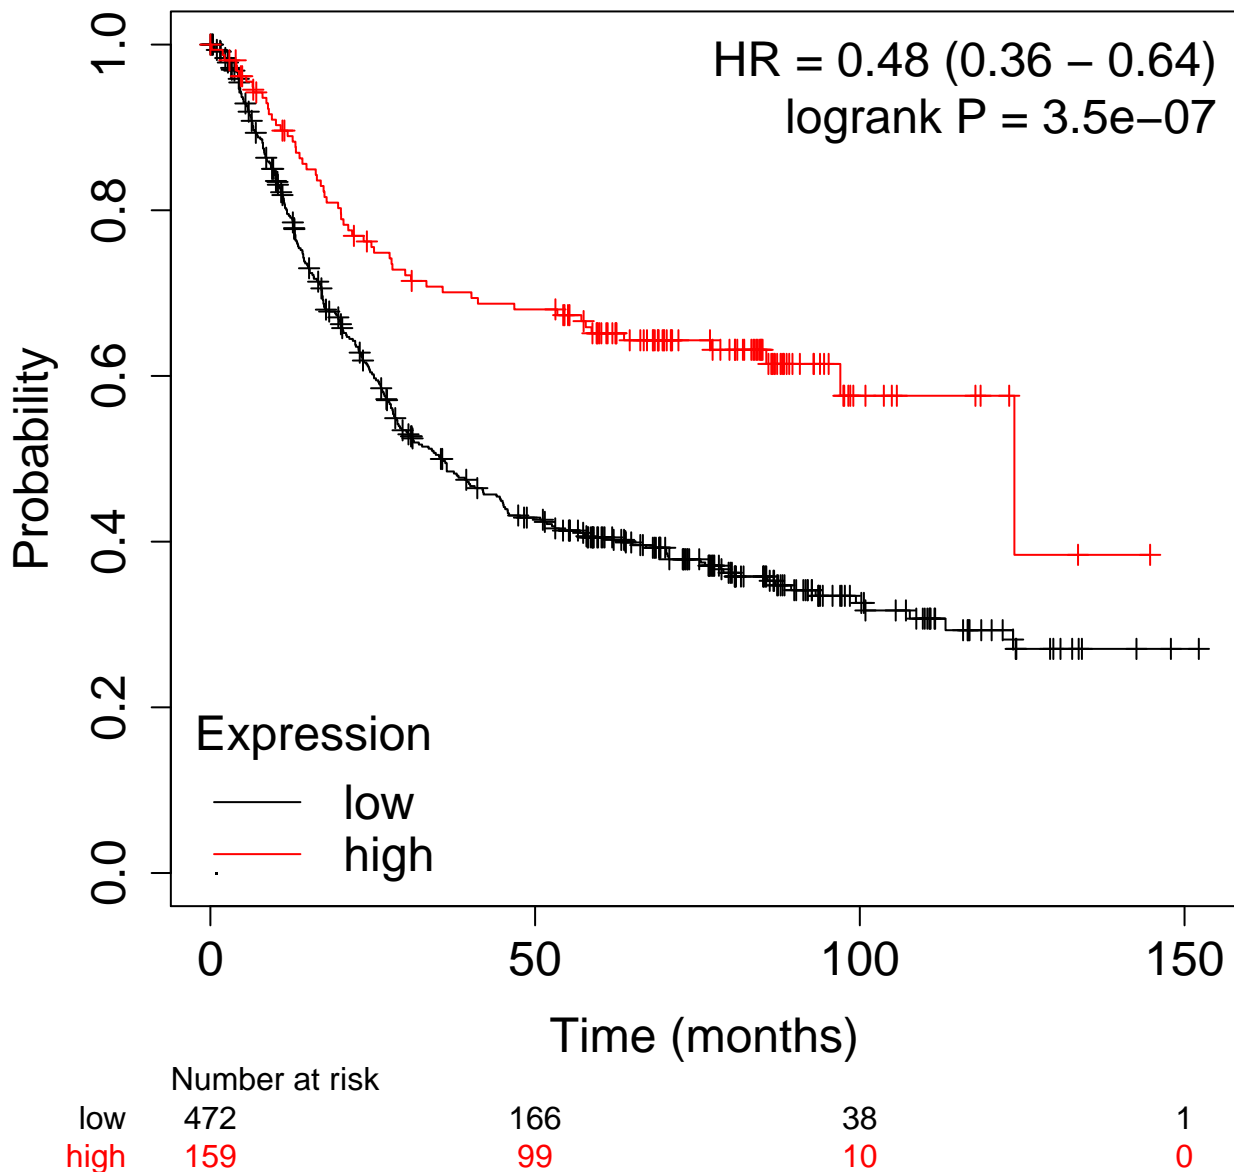

Supplement: Data_Sheet_8.ZIP [file Data_Sheet_8.ZIP]

# FAM83A (239586\_at)

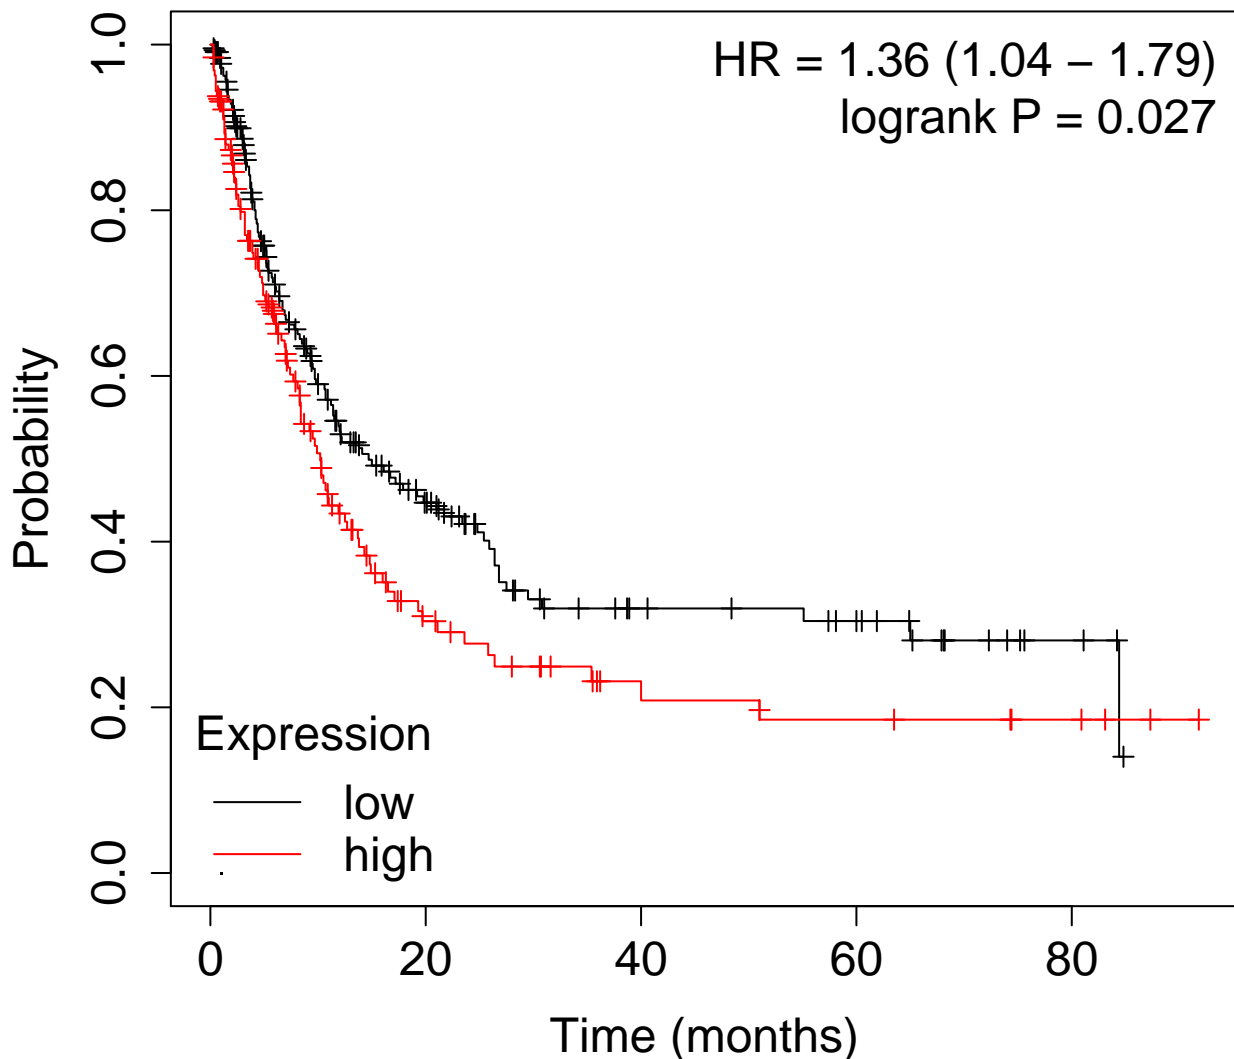

Number at risk

|      |     |    |    |    |   |
|------|-----|----|----|----|---|
| low  | 223 | 57 | 24 | 17 | 4 |
| high | 161 | 24 | 10 | 7  | 4 |

Supplement: Data_Sheet_8.ZIP [file Data_Sheet_8.ZIP]

# FAM83D (225687\_at)

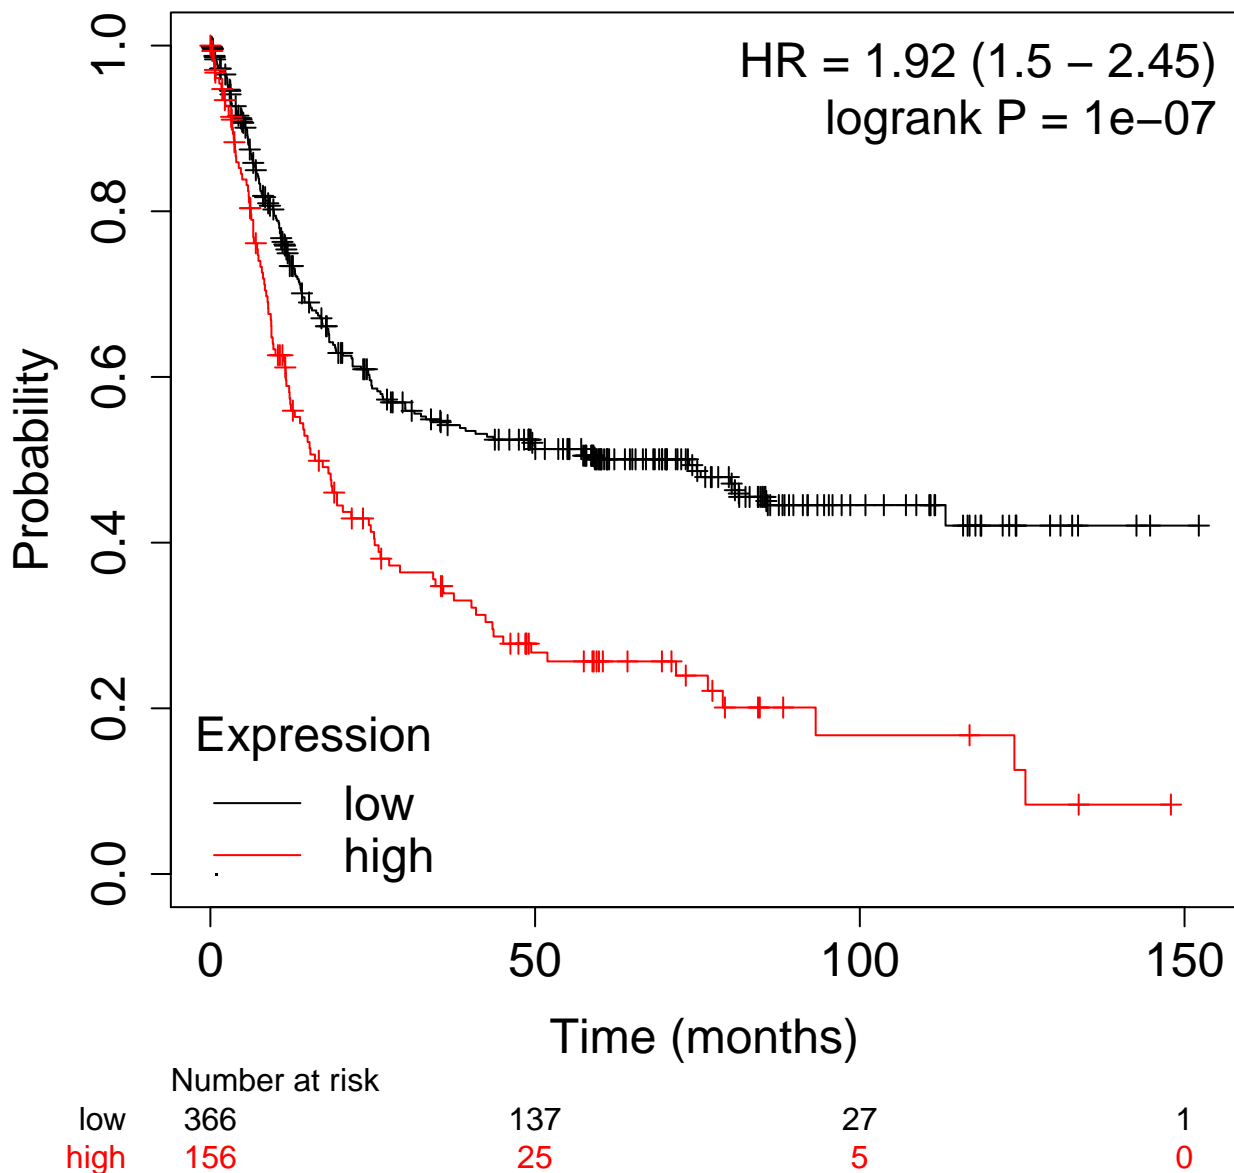

Supplement: Data_Sheet_8.ZIP [file Data_Sheet_8.ZIP]

# FAM83F (235269\_at)

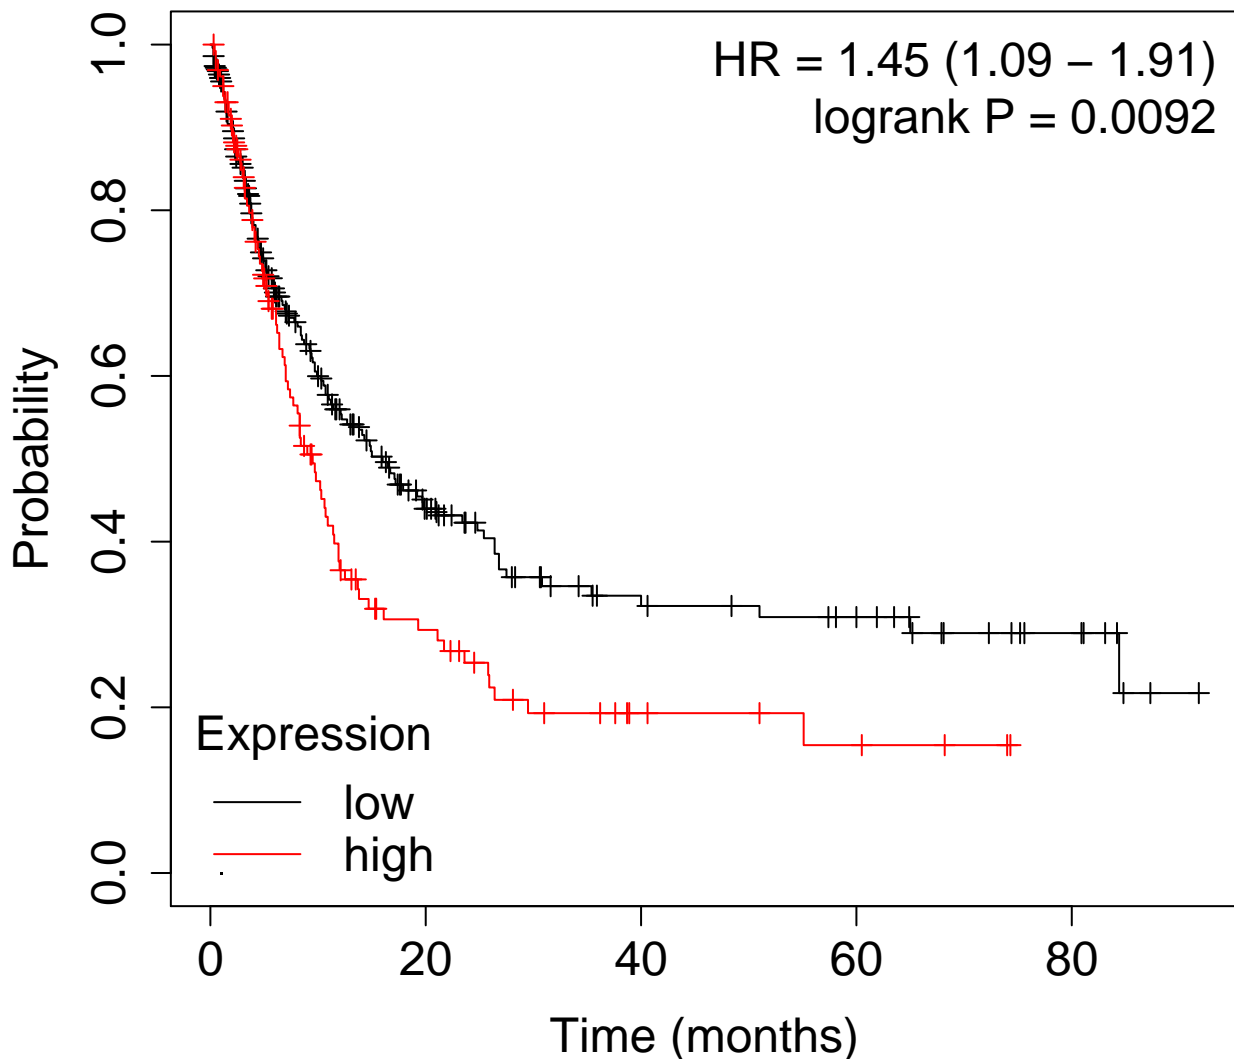

Number at risk

|      |     |    |    |    |   |
|------|-----|----|----|----|---|
| low  | 251 | 58 | 27 | 20 | 8 |
| high | 133 | 23 | 7  | 4  | 0 |

Supplement: Data_Sheet_8.ZIP [file Data_Sheet_8.ZIP]

# FAM83C (1556793\_a\_at)

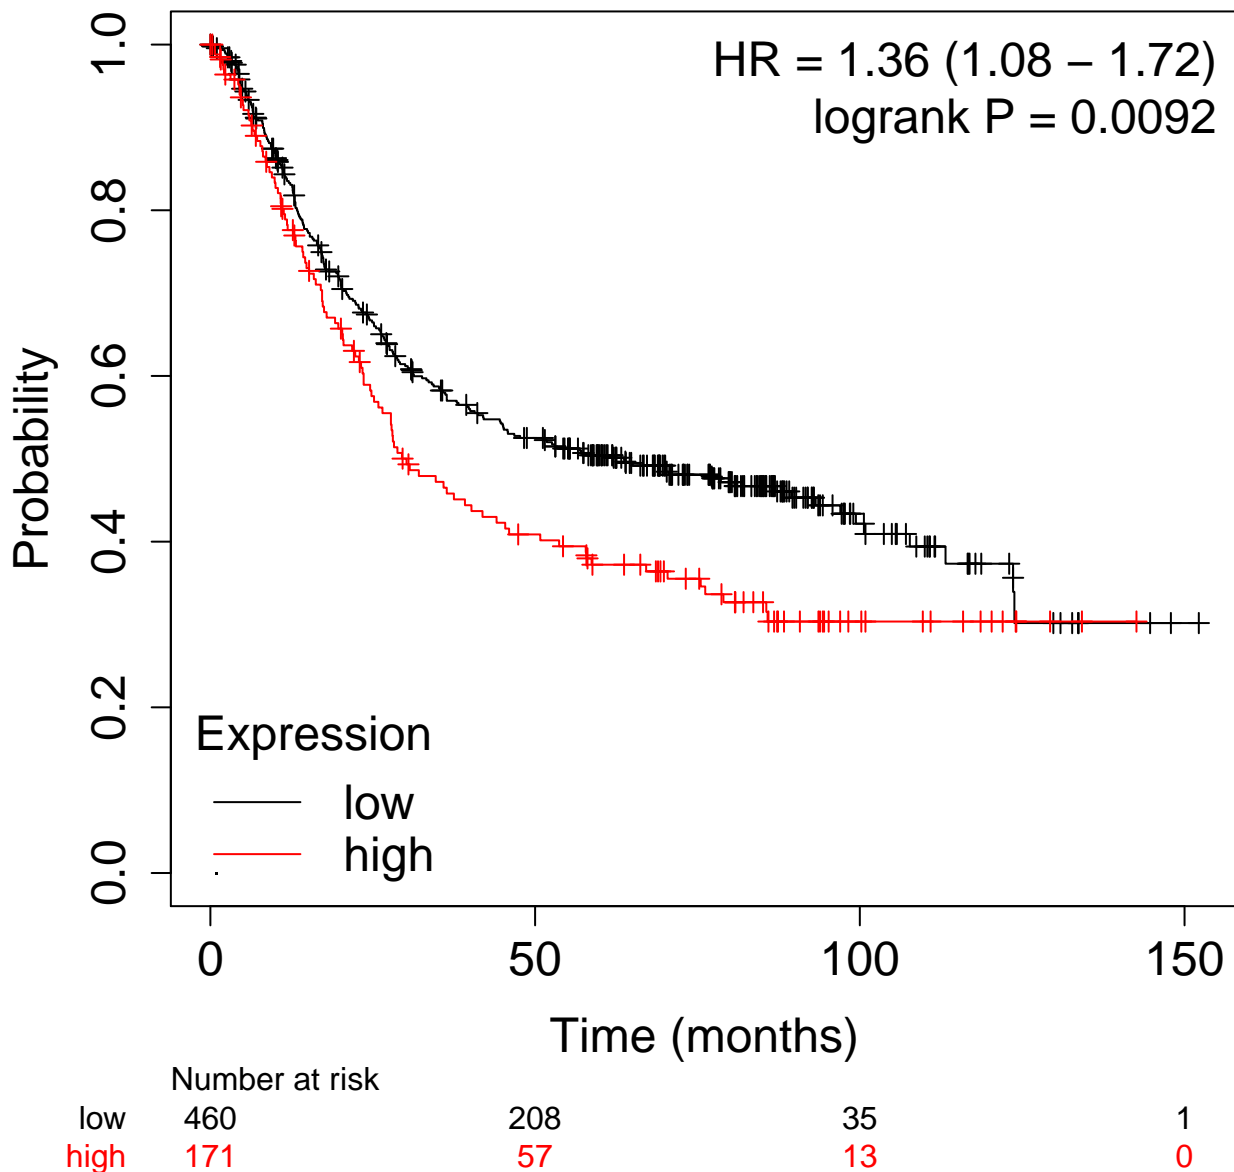

Supplement: Data_Sheet_8.ZIP [file Data_Sheet_8.ZIP]

# FAM83B (232202\_at)

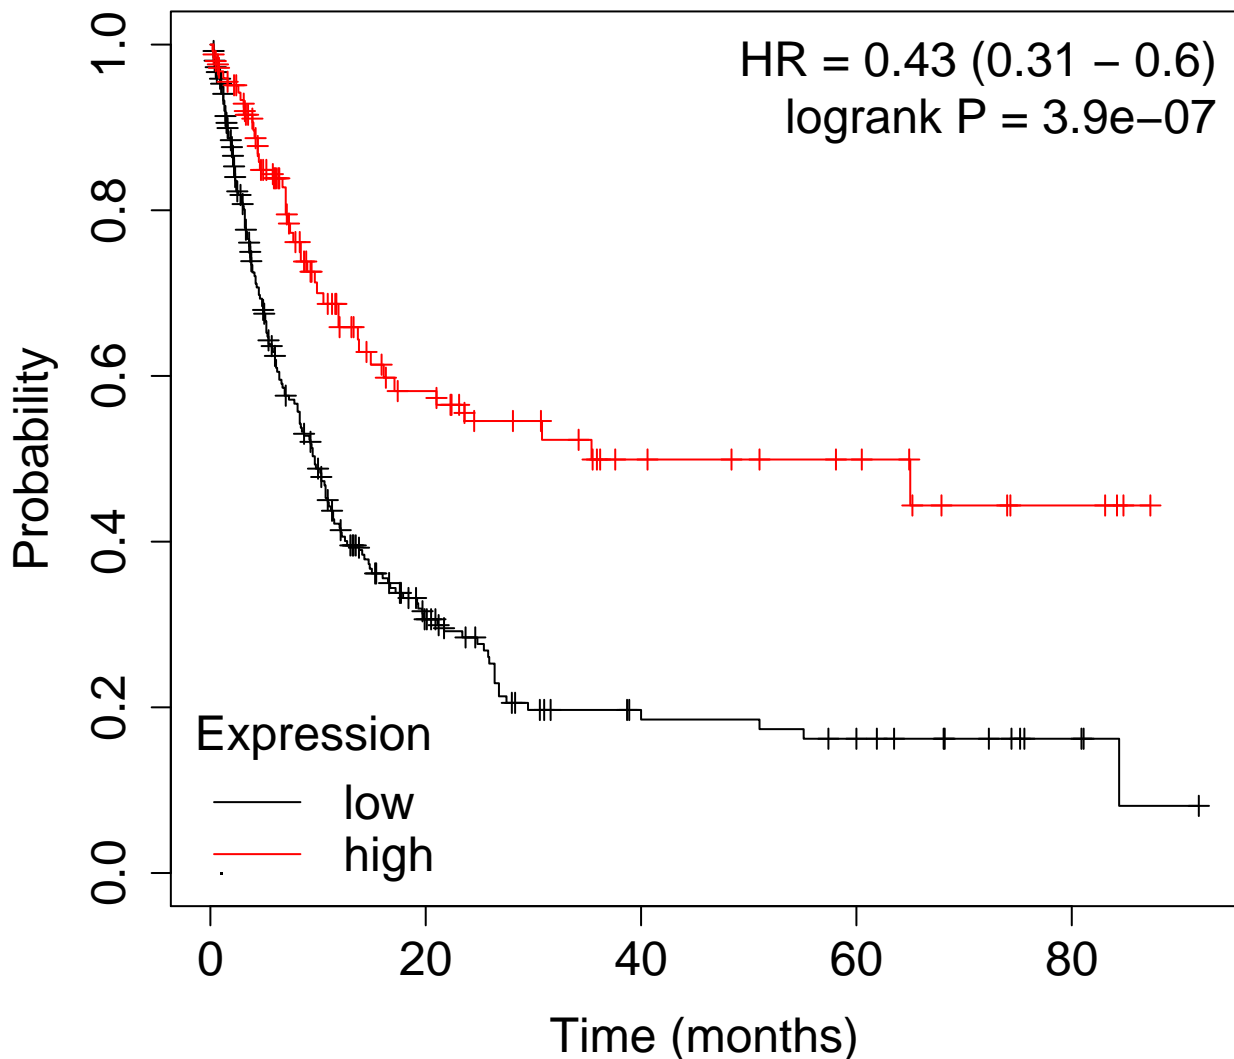

Number at risk

|      |     |    |    |    |   |
|------|-----|----|----|----|---|
| low  | 258 | 46 | 17 | 13 | 4 |
| high | 126 | 35 | 17 | 11 | 4 |

Supplement: Data_Sheet_8.ZIP [file Data_Sheet_8.ZIP]

# FAM83D (225687\_at)

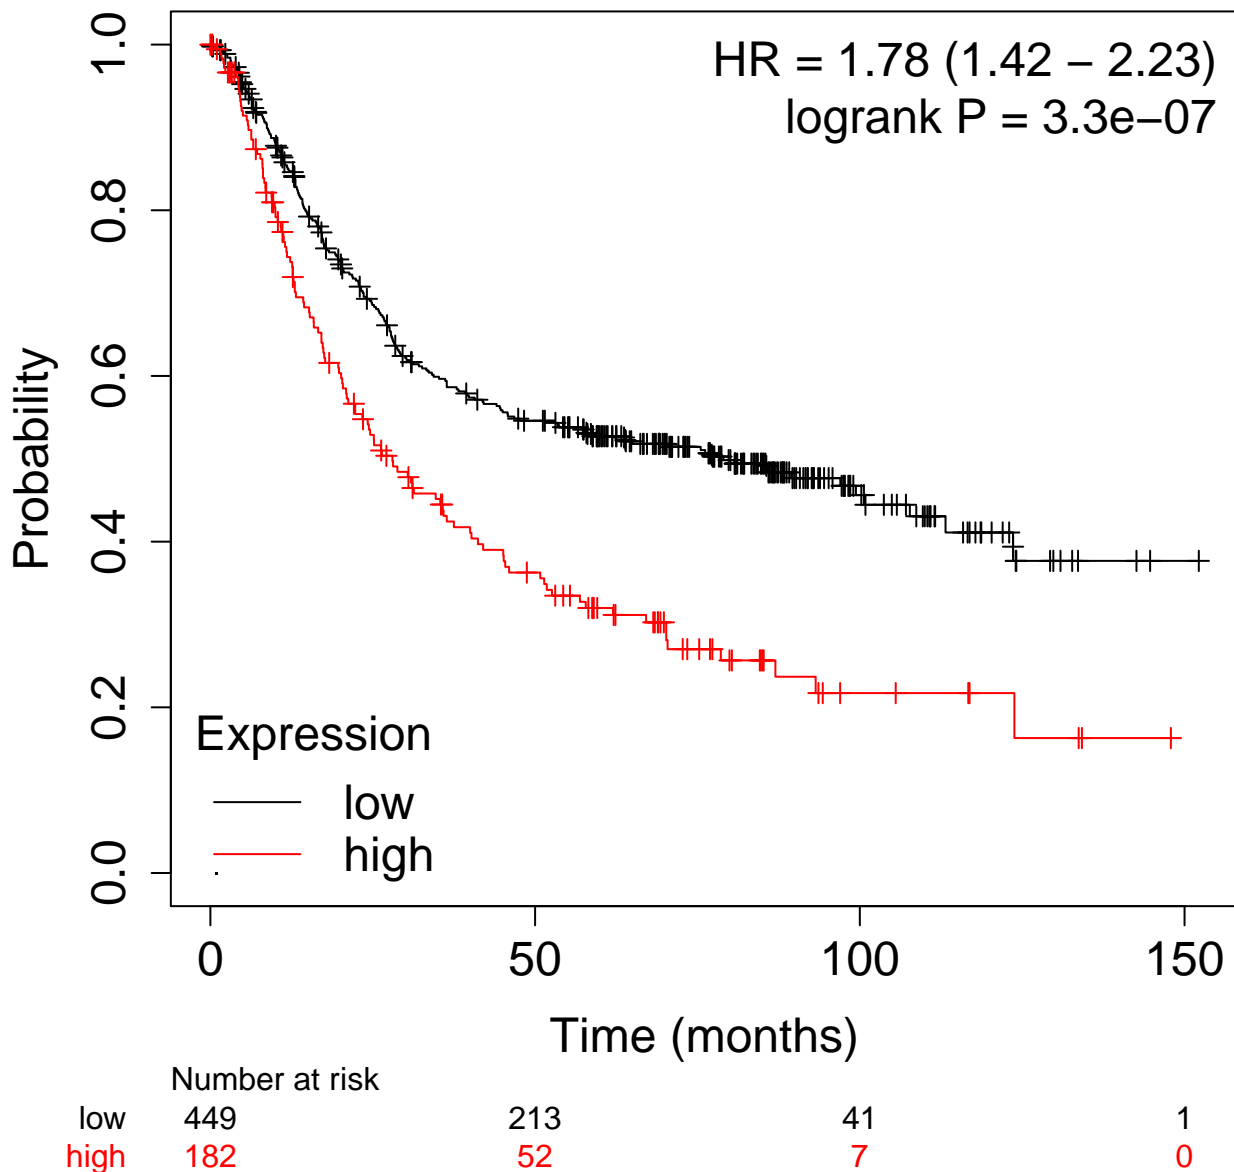

Supplement: Data_Sheet_8.ZIP [file Data_Sheet_8.ZIP]
